# Supplementary material for: Uncovering the class II-bacteriocin predatiome in salivarius streptococci
Source: Research Square preprint supplement (doi:10.21203/rs.3.rs-4499347/v1), 2024-06-26
Supplement: Supplementary file 1 [file 4e3d6bba251c46b37171f698.docx]

Multiparametric bioinformatic script to identify class II bacteriocins.

This script was created by Julien Damoczi and Adrien Knoops.

The script is optimized for complete genomes. Nevertheless, it can be used with genomes fragmented in contigs. In this case, all headers (except the first one) need to be replaced by 4000 "A" to avoid false positives. Areas highlighted in yellow should be modified according to the analysis you wish to perform.

library(BiocManager)
library(msa)

library(Biostrings)
library(XML)
library(universalmotif)
library(writexl)
library(ggseqlogo)
library(systemPipeR)

library(seqinr)

library(writexl)
library(tidyr)

library(dplyr)

library(tidyverse)

library(Peptides)
library(alakazam)

workingDirectory <- "C:/Users/damoczi/OneDrive - UCL/Documents/Thèse/Résultats/Bioinfo/Script papier"

consensus <- readDNAStringSet(paste(workingDirectory,"consensus matrix ComR_Box salivarius.fasta", sep="/"))
msa_results <- msaClustalOmega(consensus, cluster="default", gapOpening="default", gapExtension="default")
PF_matrix <- consensusMatrix(msa_results)
PW_matrix <- PWM(PF_matrix)

#Create a list with all the genomes names

streptococcus <- readDNAStringSet(paste("C:/Users/damoczi/OneDrive - UCL/Documents/Thèse/Résultats/Bioinfo/Script papier/S. salivarius2/complet/HSISS4.fna"))

#search for motif with the PW matrix in the genome


plus_hits <- matchPWM(PW_matrix,streptococcus[[1]],min.score="75%")

df_hits_plus <- rbind(data.frame(start=start(plus_hits), end=end(plus_hits), width=width(plus_hits),
 names="NZ_CP013216.1 Streptococcus salivarius strain HSISS4 chromosome, complete genome"))

results_sense <- data.frame("seqnames"=0,"subject_id"=0,"start"=0,
 "end"=0,"width"=0,"strand"=0,"inframe2end"=0,"comRbox"=0,
 "DNAseq"=0,"PROTseq"=0,stringsAsFactors=FALSE)

# Find the ORFs in the 4 kb after the comRbox
for (i in 1:nrow(df_hits_plus)){
 try(
 orf <- streptococcus[df_hits_plus$names[i]] %>%
 subseq(start = df_hits_plus$start[i], end = min(df_hits_plus$start[i]+4000, streptococcus[df_hits_plus$names[i]][[1]] %>% length)) %>%
 chartr("N", "A",. ) %>%
 predORF(n=90, startcodon = c("ATG", "TTG", "GTG") , stopcodon = c("TAA", "TAG", "TGA"), type="df", mode="orf", strand="sense") %>%
 mutate(end = end+df_hits_plus$start[i]-1) %>%
 mutate(start = start + df_hits_plus$start[i]-1 ) %>%
 mutate(comRbox = df_hits_plus$start[i])
 , silent = T)


 if (orf$start %>% length() != 0){
 for (j in 1:max(min(90,orf$start %>% length()),1)){

 orf$DNAseq[j] <- streptococcus[df_hits_plus$names[i]][[1]] %>%
 subseq(start = orf$start[j],end = orf$end[j]) %>%
 as.character()

 orf$PROTseq[j] <- orf$DNAseq[j] %>%
 s2c %>%
 translate %>%
 paste(sep="",collapse = "")
 }

 results_sense <- rbind(results_sense,orf)

 }
}

results_sense <- results_sense[-c(1),]

Regulation_box <- data.frame("Regulation_Box")
for (m in 1:nrow(results_sense)) {
 start_pos <- results_sense$comRbox[m]
 end_pos <- start_pos + 28
 upstream_seq <- subseq(streptococcus[1], end = end_pos , start = start_pos)
 Regulation_box[m] <- as.character(upstream_seq)
}
Regulation_box2 <- data.frame(t(Regulation_box))
results_sense <- cbind(results_sense, Regulation_box2)

#Reverse strand

streptococcus_rv <- reverseComplement(streptococcus)


#search for motif with the PW matrix in the genome
minus_hits <- matchPWM(PW_matrix, streptococcus_rv[[1]], min.score="75%")
df_hits_minus <- rbind(data.frame(start=start(minus_hits), end=end(minus_hits), width=width(minus_hits),
 names="NZ_CP013216.1 Streptococcus salivarius strain HSISS4 chromosome, complete genome"))

results_antisense <- data.frame("seqnames"=0,"subject_id"=0,"start"=0,
 "end"=0,"width"=0,"strand"=0,"inframe2end"=0,"comRbox"=0,
 "DNAseq"=0,"PROTseq"=0,stringsAsFactors=FALSE)

# Find the ORFs in the 4 kb after the ComRbox
for (i in 1:nrow(df_hits_minus)){
 try(
 orf <- streptococcus_rv[df_hits_minus$names[i]] %>%
 subseq(start = df_hits_minus$start[i], end = min(df_hits_minus$start[i]+4000, streptococcus_rv[df_hits_minus$names[i]][[1]] %>% length)) %>%
 chartr("N", "A",. ) %>%
 predORF(n=90, startcodon = c("ATG", "TTG", "GTG") , stopcodon = c("TAA", "TAG", "TGA"), type="df", mode="orf", strand="sense") %>%
 mutate(end = end+df_hits_minus$start[i]-1) %>%
 mutate(start = start + df_hits_minus$start[i]-1 ) %>%
 mutate(comRbox = df_hits_minus$start[i])
 , silent = T)


 if (orf$start %>% length() != 0){
 for (j in 1:max(min(90,orf$start %>% length()),1)){

 orf$DNAseq[j] <- streptococcus_rv[df_hits_minus$names[i]][[1]] %>%
 subseq(start = orf$start[j],end = orf$end[j]) %>%
 as.character()

 orf$PROTseq[j] <- orf$DNAseq[j] %>%
 s2c %>%
 translate %>%
 paste(sep="",collapse = "")
 }

 results_antisense <- rbind(results_antisense,orf)
 }
}
results_antisense <- results_antisense[-c(1),]

#add Regulation Box to the dataframe

Regulation_box <- data.frame("Regulation_Box")
for (m in 1:nrow(results_antisense)) {
 start_pos <- results_antisense$comRbox[m]
 end_pos <- start_pos + 28
 upstream_seq <- subseq(streptococcus_rv[1], end = end_pos , start = start_pos)
 Regulation_box[m] <- as.character(upstream_seq)
}
Regulation_box2 <- data.frame(t(Regulation_box))
results_antisense <- cbind(results_antisense, Regulation_box2)

#MERGING THE TWO RESULTS
results_final <- rbind(results_sense,results_antisense)


#GETTING ONLY THE ORF WITH THE MOTIF
gg_motifW <- subset(results_final,grepl("[L|V|M]....GG", results_final$PROTseq))

#subselect sequence between 40 and 100 aa
gg_motifX <- subset(gg_motifW, width<300)
gg_motifY <- subset(gg_motifX, width>120)


#split leader and mature sequence
Want_name <- regmatches(gg_motifY$PROTseq[1], regexpr("GG", gg_motifY$PROTseq[1]), invert = TRUE)

for (n in 1:nrow(gg_motifY)){
 Want_name[n] <- regmatches(gg_motifY$PROTseq[n], regexpr("GG", gg_motifY$PROTseq[n]), invert = TRUE)
}

Want_nameA <- unlist(Want_name)
Want_nameB <- as.data.frame(matrix(Want_nameA, ncol = 2, byrow = TRUE))
gg_motifY <-mutate(gg_motifY, Want_nameB)
GG <- "GG"
Want_nameD <- paste(gg_motifY$V1,GG, sep = '')
gg_motifY$V1 <- Want_nameD

#size leader sequence
for (n in 1:nrow(gg_motifY)){
 gg_motifY$Size_leader[n] <- width(gg_motifY$V1[n])
}

#keep only sequence with leader between 14 and 28 aa
gg_motifY <- subset(gg_motifY, Size_leader<29)
gg_motifY <- subset(gg_motifY, Size_leader>13)

#size mature sequence
for (n in 1:nrow(gg_motifY)){
 gg_motifY$Size_mature[n] <- width(gg_motifY$V2[n])
}

#keep only sequence with mature sequence between 25 and 70 aa
gg_motifY <- subset(gg_motifY, Size_mature<71)
gg_motifY <- subset(gg_motifY, Size_mature>24)

#GRAVY index
GRAVY <- data.frame("GRAVY")
for (n in 1:nrow(gg_motifY)) {
 GRAVY[n] <- gravy(gg_motifY$V2[n])
}

GRAVY2 <- data.frame(t(GRAVY))
gg_motifY <- cbind(gg_motifY, GRAVY2)

#Molecular weight
MW <- data.frame("MW")
for (n in 1:nrow(gg_motifY)) {
 MW[n] <- mw(gg_motifY$V2[n],monoisotopic = TRUE)
}

MW2 <- data.frame(t(MW))
gg_motifY <- cbind(gg_motifY, MW2)


#isoelectric_point
isoelectric_point <- data.frame("IP")
for (m in 1:nrow(gg_motifY)) {
 isoelectric_point[m] <- pI(gg_motifY$V2[m], pKscale= "EMBOSS")
}
isoelectric_point2 <- data.frame(t(isoelectric_point))
gg_motifY <- cbind(gg_motifY, isoelectric_point2)

#Charge
Charge <- data.frame("Q")
for (m in 1:nrow(gg_motifY)) {
 Charge[m] <- charge(gg_motifY$V2[m], pH = 7)
}
Charge2 <- data.frame(t(Charge))
gg_motifY <- cbind(gg_motifY, Charge2)

colnames(gg_motifY) <- c('Seqnames','Subject_id','Start','End','Width','Strand','Inframe2end',
 'ComRbox','DNAseq','PROTseq','Regulation box','LEADERseq','MATUREseq','Size_leader',
 'Size_mature','GRAVY','MW','Isoelectric_point','Charge')

new_order <- c('Seqnames','Start','End','Width','Regulation box','DNAseq','PROTseq','LEADERseq','MATUREseq','Size_leader',
 'Size_mature','GRAVY','MW','Isoelectric_point','Charge')

gg_motifY <- gg_motifY[, new_order]


# EXPORTING RESULTS
write_xlsx(gg_motifY,paste(workingDirectory,"bacteriocins_of_HSISS4.xlsx", sep="/"))
