# Supplementary material for: Uncovering the class II-bacteriocin predatiome in salivarius streptococci
Source: Research Square preprint supplement (doi:10.21203/rs.3.rs-4499347/v1), 2024-06-26
Supplement: Supplementary file 2 [file 512d53468c77f75170196eaf.xlsx]

## Sheet: Raw data
Seqnames	Start	End	Width	Regulation box	DNAseq	PROTseq	LEADERseq	MATUREseq	Size_leader	Size_mature	GRAVY	MW	Isoelectric_point	Charge
57.I	253634	253783	150	ATAGTGACATTTATGTCACTATTTTTTTG	ATGCGAACTAAGGCATATGGCGAAGAGCTGACTGCTGAAACCTTAGAAAATGTCACAGGGGGTGATTTTGTATCTAGACCTCAAACCTTACCTGAACGATTGGGTTGGAACAAATGGTGGTTGAAAAGAAGACCTCCTTATGGCGATTAG	MRTKAYGEELTAETLENVTGGDFVSRPQTLPERLGWNKWWLKRRPPYGD*	MRTKAYGEELTAETLENVTGG	DFVSRPQTLPERLGWNKWWLKRRPPYGD*	21	29	-1.34286	3496.83	10.8569	3.00172
57.I	316902	317132	231	GTAGTGACATTTATGTCACTACTTTTTTG	ATGACAACACAAATCATTAACAATTTTAACTCACTTAATTCCGAAGATCTTTCTACTGTTAAGGGTGGAGCATGTAGTTTTTGGGGAGCTACAGCTGCCGTAGGCGTCGGGGCTGTTGGAGGAGCCATTAAAGGTGGTATTCAAACAGGCACTTGGCAAGGTGCAGCCTTAAAGGGTATTGGTTATGGTATTAAAGGTGGGATTACTTATGGCCTTACTTGTCGTTATTAG	MTTQIINNFNSLNSEDLSTVKGGACSFWGATAAVGVGAVGGAIKGGIQTGTWQGAALKGIGYGIKGGITYGLTCRY*	MTTQIINNFNSLNSEDLSTVKGG	ACSFWGATAAVGVGAVGGAIKGGIQTGTWQGAALKGIGYGIKGGITYGLTCRY*	23	54	0.484906	5133.63	9.74961	3.93583
57.I	325505	325735	231	GTGGTGACATTTATGTCACTACTTTTTTG	ATGACAACACAAACAATGAACACTTTTGAAACACTCGATCTCGAGGCACTTGCAAACGTTGAAGGTGGTGGATGTAGCTGGGGAGGTTTTGCTAAACAAGGAGTAGCTACAGGAGTTGGTAATGGTTTACGATTAGGTATCAAAACACGTACTTGGCAAGGTGCTGTCGCAGGAGCAGCTGGAGGTGCTATTGTAGGGGGTGTTGGTTATGGAGCAACATGCTGGTGGTGA	MTTQTMNTFETLDLEALANVEGGGCSWGGFAKQGVATGVGNGLRLGIKTRTWQGAVAGAAGGAIVGGVGYGATCWW*	MTTQTMNTFETLDLEALANVEGG	GCSWGGFAKQGVATGVGNGLRLGIKTRTWQGAVAGAAGGAIVGGVGYGATCWW*	23	54	0.332075	5136.57	10.2636	3.93758
57.I	325520	325735	216	GTGGTGACATTTATGTCACTACTTTTTTG	ATGAACACTTTTGAAACACTCGATCTCGAGGCACTTGCAAACGTTGAAGGTGGTGGATGTAGCTGGGGAGGTTTTGCTAAACAAGGAGTAGCTACAGGAGTTGGTAATGGTTTACGATTAGGTATCAAAACACGTACTTGGCAAGGTGCTGTCGCAGGAGCAGCTGGAGGTGCTATTGTAGGGGGTGTTGGTTATGGAGCAACATGCTGGTGGTGA	MNTFETLDLEALANVEGGGCSWGGFAKQGVATGVGNGLRLGIKTRTWQGAVAGAAGGAIVGGVGYGATCWW*	MNTFETLDLEALANVEGG	GCSWGGFAKQGVATGVGNGLRLGIKTRTWQGAVAGAAGGAIVGGVGYGATCWW*	18	54	0.332075	5136.57	10.2636	3.93758
57.I	44335	44529	195	ATGGTGACATTTATGTCACTATTTTTTGT	ATGGTATTGAATTTAGAAAATGTAAACTGTGTTACTCTTCAAGATGAAGAATTAATGATGGTTAACGGAGGTCTCGCACCGATTGTTATTGGTGGAGTTGTCGTAGGTTGGAAGGTCATTGGTGGAGTGGCAGGTGTTATAGCAGCAAGTGGTGCTGCAGGGATTGCTGCAGGATATTATGCTAATCGTCCGTAA	MVLNLENVNCVTLQDEELMMVNGGLAPIVIGGVVVGWKVIGGVAGVIAASGAAGIAAGYYANRP*	MVLNLENVNCVTLQDEELMMVNGG	LAPIVIGGVVVGWKVIGGVAGVIAASGAAGIAAGYYANRP*	24	41	1.2225	3734.1	10.0086	1.99825
57.I	44341	44529	189	ATGGTGACATTTATGTCACTATTTTTTGT	TTGAATTTAGAAAATGTAAACTGTGTTACTCTTCAAGATGAAGAATTAATGATGGTTAACGGAGGTCTCGCACCGATTGTTATTGGTGGAGTTGTCGTAGGTTGGAAGGTCATTGGTGGAGTGGCAGGTGTTATAGCAGCAAGTGGTGCTGCAGGGATTGCTGCAGGATATTATGCTAATCGTCCGTAA	LNLENVNCVTLQDEELMMVNGGLAPIVIGGVVVGWKVIGGVAGVIAASGAAGIAAGYYANRP*	LNLENVNCVTLQDEELMMVNGG	LAPIVIGGVVVGWKVIGGVAGVIAASGAAGIAAGYYANRP*	22	41	1.2225	3734.1	10.0086	1.99825
57.I	44749	44904	156	ATGGTGACATTTATGTCACTATTTTTTGT	ATGTCTAAAAAATATGAGTTGACTAAAAAAGAATTGCAGGAAATTGAAGGTGGTGTTGCACCAATTATGGTTGCTATTGGTTTAGGAAGTCTAGCAGTAGCATCATTTAGTTCAGGATATAAATTTGGAACAGATTTAGCTAGACGTGGACGATAG	MSKKYELTKKELQEIEGGVAPIMVAIGLGSLAVASFSSGYKFGTDLARRGR*	MSKKYELTKKELQEIEGG	VAPIMVAIGLGSLAVASFSSGYKFGTDLARRGR*	18	34	0.6	3366.82	11.4308	2.99983
57.I	1987571	1987738	168	ATGGTGACATTTATGTCACTACTTTTTTA	ATGACTAAGACCATTAACAATCGTAAAAACATGACTACTCAAGAACTTGAAACTGTATCAGGTGGAGTGGTTCCTTGGGCCGCTATTTCTGTTGGCATTGCTGCTGCAAAACTGACTTATGACCTTAGCTATGCTGCAGGTAAGTCTTTCTATAACCTCACCCACTAA	MTKTINNRKNMTTQELETVSGGVVPWAAISVGIAAAKLTYDLSYAAGKSFYNLTH*	MTKTINNRKNMTTQELETVSGG	VVPWAAISVGIAAAKLTYDLSYAAGKSFYNLTH*	22	34	0.587879	3496.84	9.03496	1.23835
57.I	1987387	1987551	165	ATGGTGACATTTATGTCACTACTTTTTTA	ATGACAATGATTAACAAAGAAATGAAGGCAGCTGACCTAGCCTCAGTAACAGGAGGCGGATGGAAGACTAACCTTGCCATTGGAGGGCTCTGCCTAGCTTCAGGACCTATTGGAACTATGGTATGCCTTGGAGCCTACAATGGCTACATGGACTCTGCGAGATAA	MTMINKEMKAADLASVTGGGWKTNLAIGGLCLASGPIGTMVCLGAYNGYMDSAR*	MTMINKEMKAADLASVTGG	GWKTNLAIGGLCLASGPIGTMVCLGAYNGYMDSAR*	19	36	0.417143	3559.71	8.21289	0.937738
57.I	1987393	1987551	159	ATGGTGACATTTATGTCACTACTTTTTTA	ATGATTAACAAAGAAATGAAGGCAGCTGACCTAGCCTCAGTAACAGGAGGCGGATGGAAGACTAACCTTGCCATTGGAGGGCTCTGCCTAGCTTCAGGACCTATTGGAACTATGGTATGCCTTGGAGCCTACAATGGCTACATGGACTCTGCGAGATAA	MINKEMKAADLASVTGGGWKTNLAIGGLCLASGPIGTMVCLGAYNGYMDSAR*	MINKEMKAADLASVTGG	GWKTNLAIGGLCLASGPIGTMVCLGAYNGYMDSAR*	17	36	0.417143	3559.71	8.21289	0.937738
ATCC 25975	380439	380606	168	ATGGTGACATTTATGTCACTACTTTTTTA	ATGACTAAGACCATTAACAATCGTAAAAACATGACTACTCAAGAACTTGAAACTGTATCAGGTGGAGTGGTTCCTTGGGCCGCTATTTCTGTTGGCATTGCTGCTGCAAAACTGACTTATGACCTTAGCTATGCTGCAGGTAAGTCTTTCTATAACCTCACCCACTAA	MTKTINNRKNMTTQELETVSGGVVPWAAISVGIAAAKLTYDLSYAAGKSFYNLTH*	MTKTINNRKNMTTQELETVSGG	VVPWAAISVGIAAAKLTYDLSYAAGKSFYNLTH*	22	34	0.587879	3496.84	9.03496	1.23835
ATCC 25975	380255	380419	165	ATGGTGACATTTATGTCACTACTTTTTTA	ATGACAATGATTAACAAAGAAATGAAGGCAGCTGACCTAGCCTCAGTAACAGGAGGCGGATGGAAGACTAACCTTGCCATTGGAGGGCTCTGCCTAGCTTCAGGACCTATTGGAACTATGGTATGCCTTGGAGCCTACAATGGCTACATGGACTCTGCGAGATAA	MTMINKEMKAADLASVTGGGWKTNLAIGGLCLASGPIGTMVCLGAYNGYMDSAR*	MTMINKEMKAADLASVTGG	GWKTNLAIGGLCLASGPIGTMVCLGAYNGYMDSAR*	19	36	0.417143	3559.71	8.21289	0.937738
ATCC 25975	380261	380419	159	ATGGTGACATTTATGTCACTACTTTTTTA	ATGATTAACAAAGAAATGAAGGCAGCTGACCTAGCCTCAGTAACAGGAGGCGGATGGAAGACTAACCTTGCCATTGGAGGGCTCTGCCTAGCTTCAGGACCTATTGGAACTATGGTATGCCTTGGAGCCTACAATGGCTACATGGACTCTGCGAGATAA	MINKEMKAADLASVTGGGWKTNLAIGGLCLASGPIGTMVCLGAYNGYMDSAR*	MINKEMKAADLASVTGG	GWKTNLAIGGLCLASGPIGTMVCLGAYNGYMDSAR*	17	36	0.417143	3559.71	8.21289	0.937738
ATCC 25975	2041210	2041359	150	ATAGTGACATTTATGTCACTATTTTTTTG	ATGCGAACTAAGGCATATGGTGAAGAGCTCAATGCTGAAACCTTAGAAAATGTTACAGGGGGTGGTTTTGTATCTAAACCTCAAACCTTACCTGAACGATTGGGTTGGAATAAATGGTGGTTGAAAAGAAGACCTCCTTATGGCGATTAG	MRTKAYGEELNAETLENVTGGGFVSKPQTLPERLGWNKWWLKRRPPYGD*	MRTKAYGEELNAETLENVTGG	GFVSKPQTLPERLGWNKWWLKRRPPYGD*	21	29	-1.21071	3410.82	11.0904	4.00077
ATCC 25975	2109679	2109915	237	GTGGTGACATTAATGTCACTACTTTTTTG	ATGACAACACAAATCATTAACAATTTTAATTCACTTAATTCCGAAGATCTTTCTATTATCGAAGGTGGGGGTGTGATTGGTTGTGTAGCTGGGACTGCTGGATCTGCTGGGCTTGGATTTTTGACTGGAACATCAGTTGGAACTGTTACATTTCCAATTGTTGGGACTGTTTCAGGTGGAGCATTTGGGGCATGGTCAGGAGCTGGCCTTGGAATGGCTACATTTTGCGGAGTTTAG	MTTQIINNFNSLNSEDLSIIEGGGVIGCVAGTAGSAGLGFLTGTSVGTVTFPIVGTVSGGAFGAWSGAGLGMATFCGV*	MTTQIINNFNSLNSEDLSIIEGG	GVIGCVAGTAGSAGLGFLTGTSVGTVTFPIVGTVSGGAFGAWSGAGLGMATFCGV*	23	56	1.15455	4950.44	5.826	-0.0613069
ATCC 25975	2118806	2119039	234	GTGGTGACATACATGTCACTACTTTTTTG	ATGATAACACAAACAATGAACAATTTTGAAACACTCGATCTTGAGGCACTTGCAAACGTTGAAGGTGGAAATAGATGTAAAGATTTAATCTTTGGAGGAGCTTTAACTGGCGCAGGTGCTGGATTTACAGGTGGTATGGCAGCATTTGGTGTTACAGCATTTCCAGGAGCATTTGTAGGAGCACATGTTGGAGCAGTTGCTGGTGGGCTAGCATGTATCGGAGCGAGCTTTTAG	MITQTMNNFETLDLEALANVEGGNRCKDLIFGGALTGAGAGFTGGMAAFGVTAFPGAFVGAHVGAVAGGLACIGASF*	MITQTMNNFETLDLEALANVEGG	NRCKDLIFGGALTGAGAGFTGGMAAFGVTAFPGAFVGAHVGAVAGGLACIGASF*	23	55	0.996296	4987.47	8.24126	1.17958
ATCC 25975	2118821	2119039	219	GTGGTGACATACATGTCACTACTTTTTTG	ATGAACAATTTTGAAACACTCGATCTTGAGGCACTTGCAAACGTTGAAGGTGGAAATAGATGTAAAGATTTAATCTTTGGAGGAGCTTTAACTGGCGCAGGTGCTGGATTTACAGGTGGTATGGCAGCATTTGGTGTTACAGCATTTCCAGGAGCATTTGTAGGAGCACATGTTGGAGCAGTTGCTGGTGGGCTAGCATGTATCGGAGCGAGCTTTTAG	MNNFETLDLEALANVEGGNRCKDLIFGGALTGAGAGFTGGMAAFGVTAFPGAFVGAHVGAVAGGLACIGASF*	MNNFETLDLEALANVEGG	NRCKDLIFGGALTGAGAGFTGGMAAFGVTAFPGAFVGAHVGAVAGGLACIGASF*	18	55	0.996296	4987.47	8.24126	1.17958
ATCC 25975	2119052	2119240	189	GTGGTGACATACATGTCACTACTTTTTTG	ATGAATGTGACTAAGTATAATAAGATGTGCGATGCTGAGCTAGAAATTATTTCTGGTGGTGGGAAAGTTGGAGCAGTAATTGGTGGCTGTCTAGGTGGTATGCTCATGGCATGGGCAGCAGGACCTGTTTCCGCAGGGGGTTATACTATGATATGTGCTACTTCGGGGCTTGCAAATGCTTATTTTTGA	MNVTKYNKMCDAELEIISGGGKVGAVIGGCLGGMLMAWAAGPVSAGGYTMICATSGLANAYF*	MNVTKYNKMCDAELEIISGG	GKVGAVIGGCLGGMLMAWAAGPVSAGGYTMICATSGLANAYF*	20	43	0.985714	3992.91	8.21291	0.936947
ATCC 25975	2119058	2119240	183	GTGGTGACATACATGTCACTACTTTTTTG	GTGACTAAGTATAATAAGATGTGCGATGCTGAGCTAGAAATTATTTCTGGTGGTGGGAAAGTTGGAGCAGTAATTGGTGGCTGTCTAGGTGGTATGCTCATGGCATGGGCAGCAGGACCTGTTTCCGCAGGGGGTTATACTATGATATGTGCTACTTCGGGGCTTGCAAATGCTTATTTTTGA	VTKYNKMCDAELEIISGGGKVGAVIGGCLGGMLMAWAAGPVSAGGYTMICATSGLANAYF*	VTKYNKMCDAELEIISGG	GKVGAVIGGCLGGMLMAWAAGPVSAGGYTMICATSGLANAYF*	18	43	0.985714	3992.91	8.21291	0.936947
ATCC 25975	2118300	2118479	180	GTGGTGACATACATGTCACTACTTTTTTG	ATGACAACACAAACAATGAACAATTTTGAAACACTCAATCTCGAGACACTTGCAAACGTTGAAGGTGGCGGATGGGTTAAGTGTTATGCCGGCACAATTGGCTCTGCTCTAGTAGGATCAGCAGGAGGCCCAGTAGGTTACTGGGGAGGAGCTTTAGTTGGTTACGCTACATTCTGCTAA	MTTQTMNNFETLNLETLANVEGGGWVKCYAGTIGSALVGSAGGPVGYWGGALVGYATFC*	MTTQTMNNFETLNLETLANVEGG	GWVKCYAGTIGSALVGSAGGPVGYWGGALVGYATFC*	23	37	0.763889	3494.68	8.2049	0.936154
ATCC 25975	2118315	2118479	165	GTGGTGACATACATGTCACTACTTTTTTG	ATGAACAATTTTGAAACACTCAATCTCGAGACACTTGCAAACGTTGAAGGTGGCGGATGGGTTAAGTGTTATGCCGGCACAATTGGCTCTGCTCTAGTAGGATCAGCAGGAGGCCCAGTAGGTTACTGGGGAGGAGCTTTAGTTGGTTACGCTACATTCTGCTAA	MNNFETLNLETLANVEGGGWVKCYAGTIGSALVGSAGGPVGYWGGALVGYATFC*	MNNFETLNLETLANVEGG	GWVKCYAGTIGSALVGSAGGPVGYWGGALVGYATFC*	18	37	0.763889	3494.68	8.2049	0.936154
ATCC 25975	2118806	2119039	234	GTGGTGACATTTATGTCACTACTTTTTTG	ATGATAACACAAACAATGAACAATTTTGAAACACTCGATCTTGAGGCACTTGCAAACGTTGAAGGTGGAAATAGATGTAAAGATTTAATCTTTGGAGGAGCTTTAACTGGCGCAGGTGCTGGATTTACAGGTGGTATGGCAGCATTTGGTGTTACAGCATTTCCAGGAGCATTTGTAGGAGCACATGTTGGAGCAGTTGCTGGTGGGCTAGCATGTATCGGAGCGAGCTTTTAG	MITQTMNNFETLDLEALANVEGGNRCKDLIFGGALTGAGAGFTGGMAAFGVTAFPGAFVGAHVGAVAGGLACIGASF*	MITQTMNNFETLDLEALANVEGG	NRCKDLIFGGALTGAGAGFTGGMAAFGVTAFPGAFVGAHVGAVAGGLACIGASF*	23	55	0.996296	4987.47	8.24126	1.17958
ATCC 25975	2118821	2119039	219	GTGGTGACATTTATGTCACTACTTTTTTG	ATGAACAATTTTGAAACACTCGATCTTGAGGCACTTGCAAACGTTGAAGGTGGAAATAGATGTAAAGATTTAATCTTTGGAGGAGCTTTAACTGGCGCAGGTGCTGGATTTACAGGTGGTATGGCAGCATTTGGTGTTACAGCATTTCCAGGAGCATTTGTAGGAGCACATGTTGGAGCAGTTGCTGGTGGGCTAGCATGTATCGGAGCGAGCTTTTAG	MNNFETLDLEALANVEGGNRCKDLIFGGALTGAGAGFTGGMAAFGVTAFPGAFVGAHVGAVAGGLACIGASF*	MNNFETLDLEALANVEGG	NRCKDLIFGGALTGAGAGFTGGMAAFGVTAFPGAFVGAHVGAVAGGLACIGASF*	18	55	0.996296	4987.47	8.24126	1.17958
ATCC 25975	2119052	2119240	189	GTGGTGACATTTATGTCACTACTTTTTTG	ATGAATGTGACTAAGTATAATAAGATGTGCGATGCTGAGCTAGAAATTATTTCTGGTGGTGGGAAAGTTGGAGCAGTAATTGGTGGCTGTCTAGGTGGTATGCTCATGGCATGGGCAGCAGGACCTGTTTCCGCAGGGGGTTATACTATGATATGTGCTACTTCGGGGCTTGCAAATGCTTATTTTTGA	MNVTKYNKMCDAELEIISGGGKVGAVIGGCLGGMLMAWAAGPVSAGGYTMICATSGLANAYF*	MNVTKYNKMCDAELEIISGG	GKVGAVIGGCLGGMLMAWAAGPVSAGGYTMICATSGLANAYF*	20	43	0.985714	3992.91	8.21291	0.936947
ATCC 25975	2119058	2119240	183	GTGGTGACATTTATGTCACTACTTTTTTG	GTGACTAAGTATAATAAGATGTGCGATGCTGAGCTAGAAATTATTTCTGGTGGTGGGAAAGTTGGAGCAGTAATTGGTGGCTGTCTAGGTGGTATGCTCATGGCATGGGCAGCAGGACCTGTTTCCGCAGGGGGTTATACTATGATATGTGCTACTTCGGGGCTTGCAAATGCTTATTTTTGA	VTKYNKMCDAELEIISGGGKVGAVIGGCLGGMLMAWAAGPVSAGGYTMICATSGLANAYF*	VTKYNKMCDAELEIISGG	GKVGAVIGGCLGGMLMAWAAGPVSAGGYTMICATSGLANAYF*	18	43	0.985714	3992.91	8.21291	0.936947
ATCC 27945	1767517	1767666	150	ATAGTGACATTTATGTCACTATTTTTTTG	ATGCGAACTAAGGCATATGGCGAAGAGCTGACTGCTGAAACCTTAGAAAATGTCACAGGGGGTGATTTTGTATCTAGACCTCAAACCTTACCTGGACGATTGGGTTGGAATAGATGGTGGTTGAAAAGAAAATACCCTTATGGTGATTAG	MRTKAYGEELTAETLENVTGGDFVSRPQTLPGRLGWNRWWLKRKYPYGD*	MRTKAYGEELTAETLENVTGG	DFVSRPQTLPGRLGWNRWWLKRKYPYGD*	21	29	-1.22143	3490.82	10.9347	3.99967
ATCC 27945	1837650	1837883	234	GTGGTGACATACATGTCACTACTTTTTTG	ATGACAACACAAACAATGAACAATTTTGAAACACTCGATCTCGAGGCACTTGCAAACGTTGAAGGTGGAAATAGATGTAAAGATTTAATCTTTGGAGGAGCTTTAACTGGCGCAGGTGCTGGATTTACAGGTGGTATGGCAGCATTTGGTGTTACAGCATTTCCAGGAGCATTTGTAGGAGCACATGTTGGAGCAGTTGCTGGTGGGCTAGCATGTATCGGAGCGAGCTTTTAG	MTTQTMNNFETLDLEALANVEGGNRCKDLIFGGALTGAGAGFTGGMAAFGVTAFPGAFVGAHVGAVAGGLACIGASF*	MTTQTMNNFETLDLEALANVEGG	NRCKDLIFGGALTGAGAGFTGGMAAFGVTAFPGAFVGAHVGAVAGGLACIGASF*	23	55	0.996296	4987.47	8.24126	1.17958
ATCC 27945	1837665	1837883	219	GTGGTGACATACATGTCACTACTTTTTTG	ATGAACAATTTTGAAACACTCGATCTCGAGGCACTTGCAAACGTTGAAGGTGGAAATAGATGTAAAGATTTAATCTTTGGAGGAGCTTTAACTGGCGCAGGTGCTGGATTTACAGGTGGTATGGCAGCATTTGGTGTTACAGCATTTCCAGGAGCATTTGTAGGAGCACATGTTGGAGCAGTTGCTGGTGGGCTAGCATGTATCGGAGCGAGCTTTTAG	MNNFETLDLEALANVEGGNRCKDLIFGGALTGAGAGFTGGMAAFGVTAFPGAFVGAHVGAVAGGLACIGASF*	MNNFETLDLEALANVEGG	NRCKDLIFGGALTGAGAGFTGGMAAFGVTAFPGAFVGAHVGAVAGGLACIGASF*	18	55	0.996296	4987.47	8.24126	1.17958
ATCC 27945	1837896	1838084	189	GTGGTGACATACATGTCACTACTTTTTTG	ATGAATGTGACTAAGTATAATAAGATGTGCGATGCTGAGCTAGAAATTATTTCTGGTGGTGGGAAAGTTGGAGAAGTAATTGGTGGCTGTCTAGGTGGTATGCTCATGGCATGGGCAGCAGGACCTGTTTCCGCAGGGGGTTATACTATGATATGTGCTACTTCGGGGCTTGCAAATGCTTATTTTTGA	MNVTKYNKMCDAELEIISGGGKVGEVIGGCLGGMLMAWAAGPVSAGGYTMICATSGLANAYF*	MNVTKYNKMCDAELEIISGG	GKVGEVIGGCLGGMLMAWAAGPVSAGGYTMICATSGLANAYF*	20	43	0.859524	4050.92	6.13145	-0.0617954
ATCC 27945	1837902	1838084	183	GTGGTGACATACATGTCACTACTTTTTTG	GTGACTAAGTATAATAAGATGTGCGATGCTGAGCTAGAAATTATTTCTGGTGGTGGGAAAGTTGGAGAAGTAATTGGTGGCTGTCTAGGTGGTATGCTCATGGCATGGGCAGCAGGACCTGTTTCCGCAGGGGGTTATACTATGATATGTGCTACTTCGGGGCTTGCAAATGCTTATTTTTGA	VTKYNKMCDAELEIISGGGKVGEVIGGCLGGMLMAWAAGPVSAGGYTMICATSGLANAYF*	VTKYNKMCDAELEIISGG	GKVGEVIGGCLGGMLMAWAAGPVSAGGYTMICATSGLANAYF*	18	43	0.859524	4050.92	6.13145	-0.0617954
ATCC 27945	1926889	1927059	171	TTAGTGACATGAATGTCACTATTTTTTTC	ATGTTAGAAATAAATATGATTTATTCTGATTTATCACTTACTGAACTTGCTCAAATTAATGGGGGAGGAATTCTGTCAAGTGTAGCTGGACTTGTTAAAGATACCTGGGGAACGTTATATTCTACAGGAAGAGACTTTGGACGTAGCGTTGTTAACGCTGCTATGCCTTAA	MLEINMIYSDLSLTELAQINGGGILSSVAGLVKDTWGTLYSTGRDFGRSVVNAAMP*	MLEINMIYSDLSLTELAQINGG	GILSSVAGLVKDTWGTLYSTGRDFGRSVVNAAMP*	22	35	0.244118	3524.81	9.2964	1.00063
ATCC 27945	1927071	1927241	171	TTAGTGACATGAATGTCACTATTTTTTTC	ATGTATAGAGAAAAGAGAAATGATGAAGAACTGAATATTAATGATCTTGCCATGATTAATGGTGGAGTAGCCCCTGTAGTTATTGCTGTAGGGGTAGTTGCGACACCATTCGTACTGGGCGCGATTGCTGGAGGCGCAGATGAGTACGCAAGAAAGAGAGGGCATCACTGA	MYREKRNDEELNINDLAMINGGVAPVVIAVGVVATPFVLGAIAGGADEYARKRGHH*	MYREKRNDEELNINDLAMINGG	VAPVVIAVGVVATPFVLGAIAGGADEYARKRGHH*	22	35	0.708824	3396.88	9.30118	1.4816
ATCC 27945	1926904	1927059	156	TTAGTGACATGAATGTCACTATTTTTTTC	ATGATTTATTCTGATTTATCACTTACTGAACTTGCTCAAATTAATGGGGGAGGAATTCTGTCAAGTGTAGCTGGACTTGTTAAAGATACCTGGGGAACGTTATATTCTACAGGAAGAGACTTTGGACGTAGCGTTGTTAACGCTGCTATGCCTTAA	MIYSDLSLTELAQINGGGILSSVAGLVKDTWGTLYSTGRDFGRSVVNAAMP*	MIYSDLSLTELAQINGG	GILSSVAGLVKDTWGTLYSTGRDFGRSVVNAAMP*	17	35	0.244118	3524.81	9.2964	1.00063
ATCC 27945	438422	438589	168	ATGGTGACATTTATGTCACTACTTTTTTA	ATGACTAAGACCATTAATAATCGTAAAAACATGACTACTCAAGAACTTGAAGCTGTATCAGGTGGAGTGGTTCCTTGGGCCGCTATTTCTGTTGGCATTGCTGCTGCAAAACTGACTTATGACCTTAGCTATGCTGCAGGTAAGTCTTTCTATAACCTCACCCACTAA	MTKTINNRKNMTTQELEAVSGGVVPWAAISVGIAAAKLTYDLSYAAGKSFYNLTH*	MTKTINNRKNMTTQELEAVSGG	VVPWAAISVGIAAAKLTYDLSYAAGKSFYNLTH*	22	34	0.587879	3496.84	9.03496	1.23835
ATCC 27945	438238	438402	165	ATGGTGACATTTATGTCACTACTTTTTTA	ATGACAGTGATTAACAAAGAAATGAAGGCAGCTGACCTAGCCTCAGTAACAGGAGGCGGATGGAAGACTAACCTTGCCATTGGAGGGCTCTGCCTAGCTTCAGGACCTATTGGAACTATGGTATGCCTTGGAGCCTACAATGGCTACATGGACTCTGCGCGATAA	MTVINKEMKAADLASVTGGGWKTNLAIGGLCLASGPIGTMVCLGAYNGYMDSAR*	MTVINKEMKAADLASVTGG	GWKTNLAIGGLCLASGPIGTMVCLGAYNGYMDSAR*	19	36	0.417143	3559.71	8.21289	0.937738
ATCC 27945	438244	438402	159	ATGGTGACATTTATGTCACTACTTTTTTA	GTGATTAACAAAGAAATGAAGGCAGCTGACCTAGCCTCAGTAACAGGAGGCGGATGGAAGACTAACCTTGCCATTGGAGGGCTCTGCCTAGCTTCAGGACCTATTGGAACTATGGTATGCCTTGGAGCCTACAATGGCTACATGGACTCTGCGCGATAA	VINKEMKAADLASVTGGGWKTNLAIGGLCLASGPIGTMVCLGAYNGYMDSAR*	VINKEMKAADLASVTGG	GWKTNLAIGGLCLASGPIGTMVCLGAYNGYMDSAR*	17	36	0.417143	3559.71	8.21289	0.937738
CCHSS3	53510	53704	195	ATGGTGACATTTATGTCACTATTTTTTGT	ATGGTATTGAATTTAGAAAATGTAAACTGTGTTACTCTTCAAGATGAAGAATTGATGATGGTTAACGGAGGTCTTGCACCGATTGTAATTGGTGGAGTTGTCGTAGGTTGGAAGGTCATTGGTGGCGTTGCAGGTGTTATAGCAGCAAGTGGTGCTGCAGGGATTGCAGCAGGTTATTATGCTAATCGTCCTTAA	MVLNLENVNCVTLQDEELMMVNGGLAPIVIGGVVVGWKVIGGVAGVIAASGAAGIAAGYYANRP*	MVLNLENVNCVTLQDEELMMVNGG	LAPIVIGGVVVGWKVIGGVAGVIAASGAAGIAAGYYANRP*	24	41	1.2225	3734.1	10.0086	1.99825
CCHSS3	53516	53704	189	ATGGTGACATTTATGTCACTATTTTTTGT	TTGAATTTAGAAAATGTAAACTGTGTTACTCTTCAAGATGAAGAATTGATGATGGTTAACGGAGGTCTTGCACCGATTGTAATTGGTGGAGTTGTCGTAGGTTGGAAGGTCATTGGTGGCGTTGCAGGTGTTATAGCAGCAAGTGGTGCTGCAGGGATTGCAGCAGGTTATTATGCTAATCGTCCTTAA	LNLENVNCVTLQDEELMMVNGGLAPIVIGGVVVGWKVIGGVAGVIAASGAAGIAAGYYANRP*	LNLENVNCVTLQDEELMMVNGG	LAPIVIGGVVVGWKVIGGVAGVIAASGAAGIAAGYYANRP*	22	41	1.2225	3734.1	10.0086	1.99825
CCHSS3	53924	54079	156	ATGGTGACATTTATGTCACTATTTTTTGT	ATGTCTAAAAAATATGAGTTGAGTAAAAAAGAATTACAGGAAATTCAAGGAGGTGTTGCACCAATTATGGTTGCTATTGGTTTAGGAAGTCTAGCAGTAGCATCATTTAGTTCAGGATATAAATTTGGAACAGATTTAGCTAGACGTGGACGATAG	MSKKYELSKKELQEIQGGVAPIMVAIGLGSLAVASFSSGYKFGTDLARRGR*	MSKKYELSKKELQEIQGG	VAPIMVAIGLGSLAVASFSSGYKFGTDLARRGR*	18	34	0.6	3366.82	11.4308	2.99983
CCHSS3	2058055	2058222	168	ATAGTGACATTTATGTCACTACTTTTTTA	ATGACTAAGACAATTAACAATCGTAAACACATGACTACTCAAGAACTTGAAGCTGTATCAGGTGGAGTGGTTCCTTGGGGGGCTATTTCTGTTGGCATGGCTGCTGCGAAACTGACTTATGACCTTAGCTATGCTGCGGGTAAATCTTTCTATAACCTCACCCACTAA	MTKTINNRKHMTTQELEAVSGGVVPWGAISVGMAAAKLTYDLSYAAGKSFYNLTH*	MTKTINNRKHMTTQELEAVSGG	VVPWGAISVGMAAAKLTYDLSYAAGKSFYNLTH*	22	34	0.442424	3500.78	9.03496	1.23835
CCHSS3	2057876	2058034	159	ATAGTGACATTTATGTCACTACTTTTTTA	ATGACTAACAAAGAAATGAACACTTCTGATTTAGCCTCAGTAACAGGAGGCGGATGGAAGACTAACCTTGCCGTTGGAGGGCTCTGCCTAGCTTCAGGACCTATTGGAACTATGATTTGCCTTGGTGCCTACAACGGCTACATGGACTCTGCACGATAA	MTNKEMNTSDLASVTGGGWKTNLAVGGLCLASGPIGTMICLGAYNGYMDSAR*	MTNKEMNTSDLASVTGG	GWKTNLAVGGLCLASGPIGTMICLGAYNGYMDSAR*	17	36	0.417143	3559.71	8.21289	0.937738
CCHSS3	260174	260323	150	ATAGTGACATTTATGTCACTATTTTTTTT	ATGCGAACTAAGGTATATGGCGAAGAGCTCACTGCTGAAACGTTAGAAAATGTCACAGGGGGTGATTTTGTATCTAGACCTCAAACCTTACCTGAACGATTGGGTTGGAACAAATGGTGGTTGAAAAGAAAATACCCTTATGGTGATTAA	MRTKVYGEELTAETLENVTGGDFVSRPQTLPERLGWNKWWLKRKYPYGD*	MRTKVYGEELTAETLENVTGG	DFVSRPQTLPERLGWNKWWLKRKYPYGD*	21	29	-1.31071	3534.83	10.3219	3.00077
CCHSS3	327575	327805	231	GTAGTGACATTTATGTCACTACTTTTTTG	ATGACAACACAAATCATTAACAATTTTAATTCACTTAATTCCGAAGATCTTTCTACTGTTAAGGGGGGAGCATGTAGTTTTTGGGGAGCTACAGCTGCCGTAGGTGTCGGGGCTGTTGGAGGAGCCGTTAAAGGTGGTATTCAAACAGGTACTTGGCAAGGTGCAGCCTTAAAGGGTATTGGTTATGGTATTAAAGGTGGGATTACTTATGGCCTTACTTGTCGTTATTAG	MTTQIINNFNSLNSEDLSTVKGGACSFWGATAAVGVGAVGGAVKGGIQTGTWQGAALKGIGYGIKGGITYGLTCRY*	MTTQIINNFNSLNSEDLSTVKGG	ACSFWGATAAVGVGAVGGAVKGGIQTGTWQGAALKGIGYGIKGGITYGLTCRY*	23	54	0.479245	5119.62	9.74961	3.93583
CCHSS3	336182	336412	231	GTGGTGACATTTATGTCACTACTTTTTTG	ATGACAACACAAACAATGAACACTTTTGAAACACTCGATCTCGAGACACTTGCAAACGTTGAAGGTGGTGGATGTAGCTGGGGAGGTTTTGCTAAACAAGGAGTAGCTACAGGAGTTGGTAATGGTTTACGATTAGGTATCAAAACACGTACTTGGCAAGGTGCTGTCGCAGGAGCAGCTGGAGGTGCTATTGTAGGGGGTGTTGGTTATGGAGCAACATGCTGGTGGTGA	MTTQTMNTFETLDLETLANVEGGGCSWGGFAKQGVATGVGNGLRLGIKTRTWQGAVAGAAGGAIVGGVGYGATCWW*	MTTQTMNTFETLDLETLANVEGG	GCSWGGFAKQGVATGVGNGLRLGIKTRTWQGAVAGAAGGAIVGGVGYGATCWW*	23	54	0.332075	5136.57	10.2636	3.93758
CCHSS3	336197	336412	216	GTGGTGACATTTATGTCACTACTTTTTTG	ATGAACACTTTTGAAACACTCGATCTCGAGACACTTGCAAACGTTGAAGGTGGTGGATGTAGCTGGGGAGGTTTTGCTAAACAAGGAGTAGCTACAGGAGTTGGTAATGGTTTACGATTAGGTATCAAAACACGTACTTGGCAAGGTGCTGTCGCAGGAGCAGCTGGAGGTGCTATTGTAGGGGGTGTTGGTTATGGAGCAACATGCTGGTGGTGA	MNTFETLDLETLANVEGGGCSWGGFAKQGVATGVGNGLRLGIKTRTWQGAVAGAAGGAIVGGVGYGATCWW*	MNTFETLDLETLANVEGG	GCSWGGFAKQGVATGVGNGLRLGIKTRTWQGAVAGAAGGAIVGGVGYGATCWW*	18	54	0.332075	5136.57	10.2636	3.93758
DB-B5	1955471	1955638	168	ATGGTGACATTTATGTCACTACTTTTTTA	ATGACTAAGACCATTAACAATCGTAAAAACATGACTACTCAAGAACTTGAAGCTGTATCAGGTGGAGTGGTTCCTTGGGCCGCTATTTCTGTTGGCATTGCTGCTGCAAAACTGACTTATGACCTTAGCTATGCTGCAGGTAAGTCTTTCTATAACCTCACCCACTAA	MTKTINNRKNMTTQELEAVSGGVVPWAAISVGIAAAKLTYDLSYAAGKSFYNLTH*	MTKTINNRKNMTTQELEAVSGG	VVPWAAISVGIAAAKLTYDLSYAAGKSFYNLTH*	22	34	0.587879	3496.84	9.03496	1.23835
DB-B5	1955287	1955451	165	ATGGTGACATTTATGTCACTACTTTTTTA	ATGACAATGATTAACAAAGAAATGAAGGCAGCTGACCTAGCCTCAGTAACAGGAGGCGGATGGAAGACTAACCTTGCCATTGGAGGGCTCTGCCTAGCTTCAGGACCTATTGGAACTATGGTATGCCTTGGAGCCTACAATGGCTACATGGACTCTGCGCGATAA	MTMINKEMKAADLASVTGGGWKTNLAIGGLCLASGPIGTMVCLGAYNGYMDSAR*	MTMINKEMKAADLASVTGG	GWKTNLAIGGLCLASGPIGTMVCLGAYNGYMDSAR*	19	36	0.417143	3559.71	8.21289	0.937738
DB-B5	1955293	1955451	159	ATGGTGACATTTATGTCACTACTTTTTTA	ATGATTAACAAAGAAATGAAGGCAGCTGACCTAGCCTCAGTAACAGGAGGCGGATGGAAGACTAACCTTGCCATTGGAGGGCTCTGCCTAGCTTCAGGACCTATTGGAACTATGGTATGCCTTGGAGCCTACAATGGCTACATGGACTCTGCGCGATAA	MINKEMKAADLASVTGGGWKTNLAIGGLCLASGPIGTMVCLGAYNGYMDSAR*	MINKEMKAADLASVTGG	GWKTNLAIGGLCLASGPIGTMVCLGAYNGYMDSAR*	17	36	0.417143	3559.71	8.21289	0.937738
DB-B5	285424	285573	150	ATAGTGACATTTATGTCACTATTTTTTTG	ATGCGAACTAAGGCATATGGCGAAGAGCTCACTGCTGAAACCTTAGAAAATGTCACAGGGGGTGATTTTGTATCTAGACCTCAAACCTTACCTGAACGATTGGGTTGGAATAGATGGTGGTTGAAAAGAAAATACCCTTATGGTGATTAG	MRTKAYGEELTAETLENVTGGDFVSRPQTLPERLGWNRWWLKRKYPYGD*	MRTKAYGEELTAETLENVTGG	DFVSRPQTLPERLGWNRWWLKRKYPYGD*	21	29	-1.33214	3562.84	10.4397	3.00093
DB-B5	348939	349169	231	GTAGTGACATTTATGTCACTACTTTTTTG	ATGACAACACAAATCATTAACAATTTTAATTCACTTAATTCCGAAGATCTTTCTACTGTTAAGGGTGGAGCATGTAGTTTCTGGGGAGCTACAGCTGCCGTAGGCGTTGGGGCTGTTGGAGGAGCCATTAAAGGTGGTATTCAAACAGGTACTTGGCAAGGTGCAGCCTTAAAGGGTATTGGTTATGGTATTAAAGATGGGATTACTTATGGCCTTATTTGTCGTTATTAG	MTTQIINNFNSLNSEDLSTVKGGACSFWGATAAVGVGAVGGAIKGGIQTGTWQGAALKGIGYGIKDGITYGLICRY*	MTTQIINNFNSLNSEDLSTVKGG	ACSFWGATAAVGVGAVGGAIKGGIQTGTWQGAALKGIGYGIKDGITYGLICRY*	23	54	0.524528	5203.67	9.26645	2.93663
DB-B5	357546	357776	231	GTGGTGACATTTATGTCACTACTTTTTTG	ATGACAACACAAACAATGAACAATTTTGAAACACTCGATCTTGAGGCACTTGCAAACGTTGAAGGTGGCGGATGTAGCTGGGGAGGTTTTGCTAAACAAGGAGTAGCTACAGGAGTTGGTAATGGTTTACGATTAGGTATCAAAACACGTACTTGGCAAGGTGCTGTCGCAGGAGCAGCCGGAGGTGCTATCGTAGGTGGTGTTGGTTATGGAGCAACATGCTGGTGGTGA	MTTQTMNNFETLDLEALANVEGGGCSWGGFAKQGVATGVGNGLRLGIKTRTWQGAVAGAAGGAIVGGVGYGATCWW*	MTTQTMNNFETLDLEALANVEGG	GCSWGGFAKQGVATGVGNGLRLGIKTRTWQGAVAGAAGGAIVGGVGYGATCWW*	23	54	0.332075	5136.57	10.2636	3.93758
DB-B5	357561	357776	216	GTGGTGACATTTATGTCACTACTTTTTTG	ATGAACAATTTTGAAACACTCGATCTTGAGGCACTTGCAAACGTTGAAGGTGGCGGATGTAGCTGGGGAGGTTTTGCTAAACAAGGAGTAGCTACAGGAGTTGGTAATGGTTTACGATTAGGTATCAAAACACGTACTTGGCAAGGTGCTGTCGCAGGAGCAGCCGGAGGTGCTATCGTAGGTGGTGTTGGTTATGGAGCAACATGCTGGTGGTGA	MNNFETLDLEALANVEGGGCSWGGFAKQGVATGVGNGLRLGIKTRTWQGAVAGAAGGAIVGGVGYGATCWW*	MNNFETLDLEALANVEGG	GCSWGGFAKQGVATGVGNGLRLGIKTRTWQGAVAGAAGGAIVGGVGYGATCWW*	18	54	0.332075	5136.57	10.2636	3.93758
FDAARGOS_259	1270996	1271145	150	ATAGTGACATTTATGTCACTATTTTTTTG	ATGCGAACTAAGGCATATGGCGAAGAGCTGACTGCTGAAACCTTAGAAAATGTCACAGGGGGTGATTTTGTATCTAGACCTCAAACCTTACCTGAACGATTGGGTTGGAACAAATGGTGGTTGAAAAGAAGACCTCCTTATGGCGATTAG	MRTKAYGEELTAETLENVTGGDFVSRPQTLPERLGWNKWWLKRRPPYGD*	MRTKAYGEELTAETLENVTGG	DFVSRPQTLPERLGWNKWWLKRRPPYGD*	21	29	-1.34286	3496.83	10.8569	3.00172
FDAARGOS_259	1335010	1335240	231	GTAGTGACATTTATGTCACTACTTTTTTG	ATGACAACACAAATCATTAACAATTTTAACTCACTTAATTCCGAAGATCTTTCTACTGTTAAGGGTGGAGTATGTAGTTTTTGGGGAGCTACAGCTGCCGTAGGCGTCGGGGCTGTTGGAGGAGCCATTAAAGGTGGTATTCAAACAGGTACTTGGCAAGGTGCAGCCTTAAAGGGTATTGGTTATGGTATTAAAGATGGGATTACTTATGGCCTTATTTGTCGTTATTAG	MTTQIINNFNSLNSEDLSTVKGGVCSFWGATAAVGVGAVGGAIKGGIQTGTWQGAALKGIGYGIKDGITYGLICRY*	MTTQIINNFNSLNSEDLSTVKGG	VCSFWGATAAVGVGAVGGAIKGGIQTGTWQGAALKGIGYGIKDGITYGLICRY*	23	54	0.569811	5231.71	9.26645	2.93663
FDAARGOS_259	1343616	1343795	180	GTGGTGACATCCATGTCACTACTTTTTTG	ATGACAACACAAACAATGAACAATTTTGAAACACTCGATCTTGAGGCACTTGCAAACGTTGAAGGTGGTGGATGGGTTAAGTGTTATGCCGGAACAATCGGATCTGCTCTAGTAGGATCAGCAGGAGGCCCAGTAGGTTACTGGGGAGGAGCTTTAGTTGGTTATGCCACATTCTGCTAA	MTTQTMNNFETLDLEALANVEGGGWVKCYAGTIGSALVGSAGGPVGYWGGALVGYATFC*	MTTQTMNNFETLDLEALANVEGG	GWVKCYAGTIGSALVGSAGGPVGYWGGALVGYATFC*	23	37	0.763889	3494.68	8.2049	0.936154
FDAARGOS_259	1343631	1343795	165	GTGGTGACATCCATGTCACTACTTTTTTG	ATGAACAATTTTGAAACACTCGATCTTGAGGCACTTGCAAACGTTGAAGGTGGTGGATGGGTTAAGTGTTATGCCGGAACAATCGGATCTGCTCTAGTAGGATCAGCAGGAGGCCCAGTAGGTTACTGGGGAGGAGCTTTAGTTGGTTATGCCACATTCTGCTAA	MNNFETLDLEALANVEGGGWVKCYAGTIGSALVGSAGGPVGYWGGALVGYATFC*	MNNFETLDLEALANVEGG	GWVKCYAGTIGSALVGSAGGPVGYWGGALVGYATFC*	18	37	0.763889	3494.68	8.2049	0.936154
FDAARGOS_259	1086442	1086609	168	ATGTTGACATTTATGTCACTACTTTTTTA	ATGACTAAGACAATTAACAATCGTAAACACATGACTACTCAAGAACTTGAAGCTGTATCAGGTGGAGTGGTTCCTTGGGTGGCTATTTCTGTTGGCATGGCTGCTGCGAAACTGACTTATGACCTTAGCTATGCTGCGGGTAAATCTTTCTATAACCTCACCCACTAA	MTKTINNRKHMTTQELEAVSGGVVPWVAISVGMAAAKLTYDLSYAAGKSFYNLTH*	MTKTINNRKHMTTQELEAVSGG	VVPWVAISVGMAAAKLTYDLSYAAGKSFYNLTH*	22	34	0.581818	3542.83	9.03496	1.23835
FDAARGOS_259	1086263	1086421	159	ATGTTGACATTTATGTCACTACTTTTTTA	ATGACTAACAAAGAAAGGAACACTTCTGATTTAGCCTCAGTAACAGGAGGCGGATGGAAGACTAACCTTGCCGTTGGAGGGCTCTGCCTAGCTTCAGGACCTATTGGAACTATGATTTGCCTTGGTGCCTACAACGGCTACATGGACTCTGCACGATAA	MTNKERNTSDLASVTGGGWKTNLAVGGLCLASGPIGTMICLGAYNGYMDSAR*	MTNKERNTSDLASVTGG	GWKTNLAVGGLCLASGPIGTMICLGAYNGYMDSAR*	17	36	0.417143	3559.71	8.21289	0.937738
FDAARGOS_771	977383	977550	168	ATGGTGACATTTATGTCACTACTTTTTTA	ATGACTAAGACCATTAACAATCGTAAAAACATGACTACTCAAGAACTTGAAGCTGTATCAGGTGGAGTGGTTCCTTGGGCCGCTATTTCTGTTGGCATTGCTGCTGCAAAACTGACTTATGACCTTAGCTATGCTGCAGGTAAGTCTTTCTATAACCTCACCCACTAA	MTKTINNRKNMTTQELEAVSGGVVPWAAISVGIAAAKLTYDLSYAAGKSFYNLTH*	MTKTINNRKNMTTQELEAVSGG	VVPWAAISVGIAAAKLTYDLSYAAGKSFYNLTH*	22	34	0.587879	3496.84	9.03496	1.23835
FDAARGOS_771	977199	977363	165	ATGGTGACATTTATGTCACTACTTTTTTA	ATGACAATGATTAACAAAGAAATGAAGGCAGCTGACCTAGCCTCAGTAACAGGAGGCGGATGGAAGACTAACCTTGCCATTGGAGGGCTCTGCCTAGCTTCAGGACCTATTGGAACTATGGTATGCCTTGGGGCCTACAATGGCTACATGGACTCTGCGCGATAA	MTMINKEMKAADLASVTGGGWKTNLAIGGLCLASGPIGTMVCLGAYNGYMDSAR*	MTMINKEMKAADLASVTGG	GWKTNLAIGGLCLASGPIGTMVCLGAYNGYMDSAR*	19	36	0.417143	3559.71	8.21289	0.937738
FDAARGOS_771	977205	977363	159	ATGGTGACATTTATGTCACTACTTTTTTA	ATGATTAACAAAGAAATGAAGGCAGCTGACCTAGCCTCAGTAACAGGAGGCGGATGGAAGACTAACCTTGCCATTGGAGGGCTCTGCCTAGCTTCAGGACCTATTGGAACTATGGTATGCCTTGGGGCCTACAATGGCTACATGGACTCTGCGCGATAA	MINKEMKAADLASVTGGGWKTNLAIGGLCLASGPIGTMVCLGAYNGYMDSAR*	MINKEMKAADLASVTGG	GWKTNLAIGGLCLASGPIGTMVCLGAYNGYMDSAR*	17	36	0.417143	3559.71	8.21289	0.937738
FDAARGOS_771	1175280	1175474	195	ATGGTGACATTTATGTCACTATTTTTTGT	ATGGTATTGAATTTAGAAAATGTAAACTGTGTTACTCTTCAAGATGAAGAATTAATGATGGTTAACGGAGGTCTCGCACCGATTGTTATTGGTGGAGTTGTCGTAGGTTGGAAGGTCATTGGTGGAGTGGCAGGTGTTATAGCAGCAAGTGGTGCTGCAGGGATTGCTGCAGGATATTATGCTAATCGTCCGTAA	MVLNLENVNCVTLQDEELMMVNGGLAPIVIGGVVVGWKVIGGVAGVIAASGAAGIAAGYYANRP*	MVLNLENVNCVTLQDEELMMVNGG	LAPIVIGGVVVGWKVIGGVAGVIAASGAAGIAAGYYANRP*	24	41	1.2225	3734.1	10.0086	1.99825
FDAARGOS_771	1175286	1175474	189	ATGGTGACATTTATGTCACTATTTTTTGT	TTGAATTTAGAAAATGTAAACTGTGTTACTCTTCAAGATGAAGAATTAATGATGGTTAACGGAGGTCTCGCACCGATTGTTATTGGTGGAGTTGTCGTAGGTTGGAAGGTCATTGGTGGAGTGGCAGGTGTTATAGCAGCAAGTGGTGCTGCAGGGATTGCTGCAGGATATTATGCTAATCGTCCGTAA	LNLENVNCVTLQDEELMMVNGGLAPIVIGGVVVGWKVIGGVAGVIAASGAAGIAAGYYANRP*	LNLENVNCVTLQDEELMMVNGG	LAPIVIGGVVVGWKVIGGVAGVIAASGAAGIAAGYYANRP*	22	41	1.2225	3734.1	10.0086	1.99825
FDAARGOS_771	1175694	1175849	156	ATGGTGACATTTATGTCACTATTTTTTGT	ATGTCTAAAAAATATGAGTTGACTAAAAAAGAATTGCAGGAAATTGAAGGAGGTGTTGCACCAATTATGGTTGCTATTGGTTTAGGAAGTCTAGCAGTAGCATCATTTAGTTCAGGATATAAATTTGGAACAGATTTAGCTAGACGTGGACGATAG	MSKKYELTKKELQEIEGGVAPIMVAIGLGSLAVASFSSGYKFGTDLARRGR*	MSKKYELTKKELQEIEGG	VAPIMVAIGLGSLAVASFSSGYKFGTDLARRGR*	18	34	0.6	3366.82	11.4308	2.99983
FDAARGOS_771	1118746	1118895	150	ATAGTGACATTTATGTCACTATTTTTTTG	ATGCGAACGAAGGTATATGGCGAAGAGCTAACTGCTGAAACGTTAGAAAATGTCACAGGAGGTGATTTTGTATCTAGACCTCAAACCTTACCTGAACGATTGGGTTGGAACAGATGGTGGTTGAAAAGAAAACACCCTTATGGTGATTAG	MRTKVYGEELTAETLENVTGGDFVSRPQTLPERLGWNRWWLKRKHPYGD*	MRTKVYGEELTAETLENVTGG	DFVSRPQTLPERLGWNRWWLKRKHPYGD*	21	29	-1.4	3536.83	10.857	3.24197
FDAARGOS_771	1189639	1189866	228	GTAGTGACATCCATGTCACTACTTTTTTA	ATGACAACACAAACAATTAACAATTTTGAAACACTCGATCTTGAGGCGCTTGCGAACGTTGAAGGTGGAAAAGTCAATTGGGACCGCTTATCTAGTAGCGCTAGTGGTGCTGCTGAAGGGATTTACTTCTGTGCCGCATCAGGTGCCCCACTCTTTACGCTTGCACCTTATGCTATTGTAGGGTGTGGAGTTGTCGGAGCTGGTCTTGGTTATGCTTTCCCACATTAA	MTTQTINNFETLDLEALANVEGGKVNWDRLSSSASGAAEGIYFCAASGAPLFTLAPYAIVGCGVVGAGLGYAFPH*	MTTQTINNFETLDLEALANVEGG	KVNWDRLSSSASGAAEGIYFCAASGAPLFTLAPYAIVGCGVVGAGLGYAFPH*	23	53	0.630769	5188.56	7.24779	0.178455
FDAARGOS_771	1277969	1278139	171	TTAGTGACATGAATGTCACTATTTTTTTC	ATGTTAGAAATAAATATGATTTATTCTGATTTATCACTTACTGAACTTGCTCAAATTAATGGGGGAGGAATTCTGTCAAGTGTAGCTGGACTTGTTAAAGATACCTGGGGAACGTTATATTCTACAGGAAGAGACTTTGGACGTAGCGTTGTTAACGCTGCTATGCCTTAA	MLEINMIYSDLSLTELAQINGGGILSSVAGLVKDTWGTLYSTGRDFGRSVVNAAMP*	MLEINMIYSDLSLTELAQINGG	GILSSVAGLVKDTWGTLYSTGRDFGRSVVNAAMP*	22	35	0.244118	3524.81	9.2964	1.00063
FDAARGOS_771	1278151	1278321	171	TTAGTGACATGAATGTCACTATTTTTTTC	ATGTATAGAGAAAAGAGAAATGATGAAGAACTGAATATTAATGATCTTGCCATGATTAATGGTGGAGTAGCCCCTGTAGTTATTGCTGTAGGGGTAGTTGCGACACCATTCGTACTGGGCGCGATTGCTGGAGGCGCAGATGAGTACGCAAGAAAGAGAGGGCATCACTGA	MYREKRNDEELNINDLAMINGGVAPVVIAVGVVATPFVLGAIAGGADEYARKRGHH*	MYREKRNDEELNINDLAMINGG	VAPVVIAVGVVATPFVLGAIAGGADEYARKRGHH*	22	35	0.708824	3396.88	9.30118	1.4816
FDAARGOS_771	1277984	1278139	156	TTAGTGACATGAATGTCACTATTTTTTTC	ATGATTTATTCTGATTTATCACTTACTGAACTTGCTCAAATTAATGGGGGAGGAATTCTGTCAAGTGTAGCTGGACTTGTTAAAGATACCTGGGGAACGTTATATTCTACAGGAAGAGACTTTGGACGTAGCGTTGTTAACGCTGCTATGCCTTAA	MIYSDLSLTELAQINGGGILSSVAGLVKDTWGTLYSTGRDFGRSVVNAAMP*	MIYSDLSLTELAQINGG	GILSSVAGLVKDTWGTLYSTGRDFGRSVVNAAMP*	17	35	0.244118	3524.81	9.2964	1.00063
FDAARGOS_771	1180954	1181274	231	GTAGTGACATTTATGTCACTACTTTTTTG	ATGACAACACAAATCATTAACAATTTTAACTCACTTAATTCCGAAGATCTTTCTACTGTTAAGGGTGGAGCATGTAGTTTTTGGGGAGCTACAGCTGCCGTAGGCGTCGGGGCTGTTGGAGGAGCCATTAAAGGTGGTATTCAAACAGGTACTTGGCAAGGTGCAGCCTTAAAGGGTATTGGTTATGGTATTAAAGATGGGATTACTTATGGCCTTATTTGTCGTTATTAG	MTTQIINNFNSLNSEDLSTVKGGACSFWGATAAVGVGAVGGAIKGGIQTGTWQGAALKGIGYGIKDGITYGLICRY*	MTTQIINNFNSLNSEDLSTVKGG	ACSFWGATAAVGVGAVGGAIKGGIQTGTWQGAALKGIGYGIKDGITYGLICRY*	23	54	0.524528	5203.67	9.26645	2.93663
FDAARGOS_1045	140018	140167	150	GTAGTGACATTTATGTCACTATTTTTTTG	ATGCGAACTAAGGCATATGGTGAAGAGCTCAATGCTGAAACCTTAGAAAATGTTACAGGGGGTGGTTTTGTATCTAAACCTCAAACCTTACCTGAACGATTGGGTTGGAACAAATGGTGGTTGAAAAGAAGACCTCCTTATGGCGATTAG	MRTKAYGEELNAETLENVTGGGFVSKPQTLPERLGWNKWWLKRRPPYGD*	MRTKAYGEELNAETLENVTGG	GFVSKPQTLPERLGWNKWWLKRRPPYGD*	21	29	-1.21071	3410.82	11.0904	4.00077
FDAARGOS_1045	209141	209371	231	GTGGTGACATAAATGTCACTACTTTTTTG	ATGACAACACAAATCATTAACAATTTTAACTCACTTAATTCCGAAGATCTTTCTACTGTTAAGGGGGGAGCATGTAGTTTTTGGGGAGCTACAGCTGCCGTAGGTGTCGGGGCTGTTGGAGGAGCCGTTAAAGGTGGTATTCAAACAGGTACTTGGCAAGGTGCAGCCTTAAAGGGTATTGGTTATGGTATTAAAGGTGGGATTACTTATGGCCTTACTTGTCGTTATTAG	MTTQIINNFNSLNSEDLSTVKGGACSFWGATAAVGVGAVGGAVKGGIQTGTWQGAALKGIGYGIKGGITYGLTCRY*	MTTQIINNFNSLNSEDLSTVKGG	ACSFWGATAAVGVGAVGGAVKGGIQTGTWQGAALKGIGYGIKGGITYGLTCRY*	23	54	0.479245	5119.62	9.74961	3.93583
FDAARGOS_1045	217737	217964	228	GTGGTGACATTCATGTCACTACTTTTTTG	ATGACAACACAAACAATTAACACTTTTGAAACACTCGATTTCGAGGCACTTGCAAACGTTGAAGGTGGAAAAGTCAATTGGGACCGTTTATCTAGTAGCGCTAGTGGTGCTGCTGAGGGAATTTATTTCTGTGCCGCATCAGGTGCTCCACTCTTTACGCTTGCACCTTATGCTATTGTAGGGTGTGGAGTTGTCGGAGCTGGTCTTGGTTATGCTTTCCCACATTAA	MTTQTINTFETLDFEALANVEGGKVNWDRLSSSASGAAEGIYFCAASGAPLFTLAPYAIVGCGVVGAGLGYAFPH*	MTTQTINTFETLDFEALANVEGG	KVNWDRLSSSASGAAEGIYFCAASGAPLFTLAPYAIVGCGVVGAGLGYAFPH*	23	53	0.630769	5188.56	7.24779	0.178455
FDAARGOS_1045	2269950	2270117	168	ATGGTGACATTTATGTCACTACTTTTTTA	ATGACTAAGACAATTAACAATCGTAAACACATGACTACTCAAGAACTTGAAGCTGTATCAGGTGGAGTAGTTCCTTGGGTGGCTATTTCTGTTGGCATGGCTGCTGCAAAACTGACTTATGACCTTAGCTATGCTGCAGGTAAGTCTTTCTATAACCTCACCCACTAA	MTKTINNRKHMTTQELEAVSGGVVPWVAISVGMAAAKLTYDLSYAAGKSFYNLTH*	MTKTINNRKHMTTQELEAVSGG	VVPWVAISVGMAAAKLTYDLSYAAGKSFYNLTH*	22	34	0.581818	3542.83	9.03496	1.23835
FDAARGOS_1045	2269771	2269929	159	ATGGTGACATTTATGTCACTACTTTTTTA	ATGACTAACAAAGAAATGAACACTTCTGATTTAGCCTCAGTAACAGGAGGCGGATGGAAGACTAACCTTGCCGTTGGAGGGCTCTGCCTAGCTTCAGGACCTATTGGAACTATGATTTGCCTTGGTGCCTACAACGGCTACATGGACTCTGCACGATAA	MTNKEMNTSDLASVTGGGWKTNLAVGGLCLASGPIGTMICLGAYNGYMDSAR*	MTNKEMNTSDLASVTGG	GWKTNLAVGGLCLASGPIGTMICLGAYNGYMDSAR*	17	36	0.417143	3559.71	8.21289	0.937738
HSISS4	1949894	1950061	168	ATGGTGACATTTATGTCACTACTTTTTTA	ATGACTAAGACCATTAACAATCGTAAAAACATGACTACTCAAGAACTTGAAGCTGTATCAGGTGGAGTAGTTCCTTGGGCCGCTATTTCTGTTGGCATCGCTGCTGCAAAACTGACTTATGACCTTAGCTATGCTGCAGGTAAGTCTTTCTATAACCTCACCCACTAA	MTKTINNRKNMTTQELEAVSGGVVPWAAISVGIAAAKLTYDLSYAAGKSFYNLTH*	MTKTINNRKNMTTQELEAVSGG	VVPWAAISVGIAAAKLTYDLSYAAGKSFYNLTH*	22	34	0.587879	3496.84	9.03496	1.23835
HSISS4	1949710	1949874	165	ATGGTGACATTTATGTCACTACTTTTTTA	ATGACAATGATTAACAAAGAAATGAAGGCAGCTGACCTAGCCTCAGTAACAGGAGGAGGATGGAAGACTAACCTTGCCATTGGAGGGCTCTGCCTAGCTTCAGGACCTATTGGAACGATGGTATGCCTTGGAGCCTACAATGGCTACATGGACTCTGCGCGATAA	MTMINKEMKAADLASVTGGGWKTNLAIGGLCLASGPIGTMVCLGAYNGYMDSAR*	MTMINKEMKAADLASVTGG	GWKTNLAIGGLCLASGPIGTMVCLGAYNGYMDSAR*	19	36	0.417143	3559.71	8.21289	0.937738
HSISS4	1949716	1949874	159	ATGGTGACATTTATGTCACTACTTTTTTA	ATGATTAACAAAGAAATGAAGGCAGCTGACCTAGCCTCAGTAACAGGAGGAGGATGGAAGACTAACCTTGCCATTGGAGGGCTCTGCCTAGCTTCAGGACCTATTGGAACGATGGTATGCCTTGGAGCCTACAATGGCTACATGGACTCTGCGCGATAA	MINKEMKAADLASVTGGGWKTNLAIGGLCLASGPIGTMVCLGAYNGYMDSAR*	MINKEMKAADLASVTGG	GWKTNLAIGGLCLASGPIGTMVCLGAYNGYMDSAR*	17	36	0.417143	3559.71	8.21289	0.937738
HSISS4	236992	237192	201	ATAGTGACATTTATGTCACTATTTTTTAT	TTGAAAACATCAGAAATGACACAACAAGTATTGACACATCAGGAATTATCAGTGGTTGTAGGTGGTGGATGTAGTTGGAACAATGCAGCTAAGGCAGCCCTCGGAACAAGTATCACGGGTCTTATCACTAGTGGCCCAGGAGGAGCTTTATTGGGATTAGCTGGAGGAGCAGTAAGTTACGGAGCGTTGTGTTGGGTATGA	LKTSEMTQQVLTHQELSVVVGGGCSWNNAAKAALGTSITGLITSGPGGALLGLAGGAVSYGALCWV*	LKTSEMTQQVLTHQELSVVVGG	GCSWNNAAKAALGTSITGLITSGPGGALLGLAGGAVSYGALCWV*	22	45	0.788636	4105.08	8.22118	0.937741
HSISS4	237007	237192	186	ATAGTGACATTTATGTCACTATTTTTTAT	ATGACACAACAAGTATTGACACATCAGGAATTATCAGTGGTTGTAGGTGGTGGATGTAGTTGGAACAATGCAGCTAAGGCAGCCCTCGGAACAAGTATCACGGGTCTTATCACTAGTGGCCCAGGAGGAGCTTTATTGGGATTAGCTGGAGGAGCAGTAAGTTACGGAGCGTTGTGTTGGGTATGA	MTQQVLTHQELSVVVGGGCSWNNAAKAALGTSITGLITSGPGGALLGLAGGAVSYGALCWV*	MTQQVLTHQELSVVVGG	GCSWNNAAKAALGTSITGLITSGPGGALLGLAGGAVSYGALCWV*	17	45	0.788636	4105.08	8.22118	0.937741
HSISS4	248360	248509	150	ATAGTGACATTTATGTCACTATTTTTTTG	ATGCGAACTAAGGCATATGGCGAAGAGCTGACTGCTGAAACCTTAGAAAATGTCACAGGGGGTGATTTTGTATCTAGACCTCAAACCTTACCTGAACGATTGGGTTGGAACAAATGGTGGTTGAAAAGAAGACCTCCTTATGGCGATTAG	MRTKAYGEELTAETLENVTGGDFVSRPQTLPERLGWNKWWLKRRPPYGD*	MRTKAYGEELTAETLENVTGG	DFVSRPQTLPERLGWNKWWLKRRPPYGD*	21	29	-1.34286	3496.83	10.8569	3.00172
HSISS4	311847	312077	231	GTAGTGACATTTATGTCACTACTTTTTTG	ATGACGACACAAATCATTAACAATTTTAACTCACTTAATTCCGAAGATCTTTCTACTGTTAAGGGTGGAGCATGTAGTTTTTGGGGAGCTACAGCTGCCGTAGGCGTCGGGGCTGTTGGAGGAGCCATTAAAGGTGGTATTCAAACAGGTACTTGGCAAGGTGCAGCCTTAAAGGGTATTGGTTATGGTATTAAAGATGGGATTACTTATGGACTTATTTGTCGTTATTAG	MTTQIINNFNSLNSEDLSTVKGGACSFWGATAAVGVGAVGGAIKGGIQTGTWQGAALKGIGYGIKDGITYGLICRY*	MTTQIINNFNSLNSEDLSTVKGG	ACSFWGATAAVGVGAVGGAIKGGIQTGTWQGAALKGIGYGIKDGITYGLICRY*	23	54	0.524528	5203.67	9.26645	2.93663
HSISS4	320444	320674	231	GTAGTGACATTTATGTCACTACTTTTTTG	ATGACAACACAAACAATGAACAATTTTGAAACACTCGATCTTGAGGCGCTTGCAAACGTTGAAGGTGGTGGATGTAGCTGGGGAGGTTTTGCTAAACAAGGAGTAGCTACAGGAGTTGGTAATGGTTTACGACTAGGTATCAAAACACGTACTTGGCAAGGTGCTGTCGCAGGAGCAGCTGGAGGTGCTATCGTAGGTGGTGTTGGTTATGGAGCAACATGCTGGTGGTGA	MTTQTMNNFETLDLEALANVEGGGCSWGGFAKQGVATGVGNGLRLGIKTRTWQGAVAGAAGGAIVGGVGYGATCWW*	MTTQTMNNFETLDLEALANVEGG	GCSWGGFAKQGVATGVGNGLRLGIKTRTWQGAVAGAAGGAIVGGVGYGATCWW*	23	54	0.332075	5136.57	10.2636	3.93758
HSISS4	320459	320674	216	GTAGTGACATTTATGTCACTACTTTTTTG	ATGAACAATTTTGAAACACTCGATCTTGAGGCGCTTGCAAACGTTGAAGGTGGTGGATGTAGCTGGGGAGGTTTTGCTAAACAAGGAGTAGCTACAGGAGTTGGTAATGGTTTACGACTAGGTATCAAAACACGTACTTGGCAAGGTGCTGTCGCAGGAGCAGCTGGAGGTGCTATCGTAGGTGGTGTTGGTTATGGAGCAACATGCTGGTGGTGA	MNNFETLDLEALANVEGGGCSWGGFAKQGVATGVGNGLRLGIKTRTWQGAVAGAAGGAIVGGVGYGATCWW*	MNNFETLDLEALANVEGG	GCSWGGFAKQGVATGVGNGLRLGIKTRTWQGAVAGAAGGAIVGGVGYGATCWW*	18	54	0.332075	5136.57	10.2636	3.93758
ICDC1	2040628	2040795	168	ATGGTGACATTTATGTCACTACTTTTTTA	ATGACTAAGACCATTAACAATCGTAAAAACATGACTACTCAAGAACTTGAAACTGTATCAGGTGGAGTGGTTCCTTGGGCCGCTATTTCTGTTGGCATTGCTGCTGCAAAACTGACTTATGACCTTAGCTATGCTGCAGGTAAGTCTTTCTATAACCTCACCCACTAA	MTKTINNRKNMTTQELETVSGGVVPWAAISVGIAAAKLTYDLSYAAGKSFYNLTH*	MTKTINNRKNMTTQELETVSGG	VVPWAAISVGIAAAKLTYDLSYAAGKSFYNLTH*	22	34	0.587879	3496.84	9.03496	1.23835
ICDC1	2040444	2040608	165	ATGGTGACATTTATGTCACTACTTTTTTA	ATGACAATGATTAACAAAGAAATGAAGGCAGCTGACCTAGCCTCAGTAACAGGAGGCGGATGGAAGACTAACCTTGCCATTGGAGGGCTCTGCCTAGCTTCAGGACCTATTGGAACTATGGTATGCCTTGGAGCCTACAATGGCTACATGGACTCTGCGAGATAA	MTMINKEMKAADLASVTGGGWKTNLAIGGLCLASGPIGTMVCLGAYNGYMDSAR*	MTMINKEMKAADLASVTGG	GWKTNLAIGGLCLASGPIGTMVCLGAYNGYMDSAR*	19	36	0.417143	3559.71	8.21289	0.937738
ICDC1	2040450	2040608	159	ATGGTGACATTTATGTCACTACTTTTTTA	ATGATTAACAAAGAAATGAAGGCAGCTGACCTAGCCTCAGTAACAGGAGGCGGATGGAAGACTAACCTTGCCATTGGAGGGCTCTGCCTAGCTTCAGGACCTATTGGAACTATGGTATGCCTTGGAGCCTACAATGGCTACATGGACTCTGCGAGATAA	MINKEMKAADLASVTGGGWKTNLAIGGLCLASGPIGTMVCLGAYNGYMDSAR*	MINKEMKAADLASVTGG	GWKTNLAIGGLCLASGPIGTMVCLGAYNGYMDSAR*	17	36	0.417143	3559.71	8.21289	0.937738
ICDC1	247087	247236	150	ATAGTGACATTTATGTCACTATTTTTTTG	ATGCGAACTAAGGTATATGGCGAAGAGCTCACTGCTGAAACGTTAGAAAATGTCACAGGGGGTGATTTTGTATCTAGACCTCAAACCTTACCTGAACGATTGGGTTGGAACAAATGGTGGTTGAAAAGAAAATACCCTTATGGTGATTAA	MRTKVYGEELTAETLENVTGGDFVSRPQTLPERLGWNKWWLKRKYPYGD*	MRTKVYGEELTAETLENVTGG	DFVSRPQTLPERLGWNKWWLKRKYPYGD*	21	29	-1.31071	3534.83	10.3219	3.00077
ICDC1	310090	310320	231	GTAGTGACATTTATGTCACTACTTTTTTG	ATGACAACACAAATCATTAACAATTTTAACTCACTTAATTCCGAAGATCTTTCTACTGTTAAGGGTGGAGCATGTAGTTTTTGGGGAGCTACAGCTGCCGTAGGCGTCGGGGCTGTTGGAGGAGCCATTAAAGGTGGTATTCAAACAGGTACTTGGCAAGGTGCAGCCTTAAAGGGTATTGGTTATGGTATTAAAGATGGGATTACTTATGGCCTTATTTGTCGTTATTAG	MTTQIINNFNSLNSEDLSTVKGGACSFWGATAAVGVGAVGGAIKGGIQTGTWQGAALKGIGYGIKDGITYGLICRY*	MTTQIINNFNSLNSEDLSTVKGG	ACSFWGATAAVGVGAVGGAIKGGIQTGTWQGAALKGIGYGIKDGITYGLICRY*	23	54	0.524528	5203.67	9.26645	2.93663
ICDC1	321698	321922	225	GTGGTGACATTTATGTCACTACTTTTTTG	ATGGCAACTAAAACAATTGAAAACTTTAACACCCTTGACTTCGAAACGCTTGCAAGTGTTGAAGGGGGGAAAGTCATTTATTACGGTAATGGCCTATACTGTAAATCAAATGGTGGTTGTTGGGTAGATTGGTCACAAACAATTAATTCTATTCTAACGAATTCTGCAATGAATTGGGCGACTCGCGGAAATGCTGGATGGCATTCAGGTGGTATTGCTCCATAA	MATKTIENFNTLDFETLASVEGGKVIYYGNGLYCKSNGGCWVDWSQTINSILTNSAMNWATRGNAGWHSGGIAP*	MATKTIENFNTLDFETLASVEGG	KVIYYGNGLYCKSNGGCWVDWSQTINSILTNSAMNWATRGNAGWHSGGIAP*	23	52	-0.270588	5517.59	8.74685	2.17704
ICDC1	322177	322356	180	GTGGTGACATTTATGTCACTACTTTTTTG	ATGCTTACAGAACTAACATATAACGACCTTGAAGTAACCCAAGGTGGCGCTGTTTGTCGTATGCCAAATGTGAATAGCAAAGAGGGGGACCCTCTCAAAGACGGTTGGGTATCACCACCTAAATATCGAAGCGGTGAAGCCTATCCGATGGTTTATATACCTATCTGTGCTATTATGTAA	MLTELTYNDLEVTQGGAVCRMPNVNSKEGDPLKDGWVSPPKYRSGEAYPMVYIPICAIM*	MLTELTYNDLEVTQGG	AVCRMPNVNSKEGDPLKDGWVSPPKYRSGEAYPMVYIPICAIM*	16	44	-0.22093	4781.33	8.2018	0.939932
ICDC1	318688	318867	180	GTGGTGACATTTATGTCACTACTTTTTTG	ATGACAACACAAACAATGAACAATTTTGAAACACTCGATCTCGAGACACTTGCAAACGTTGAAGGTGGTGGATGGGTTAAGTGTTATGCCGGCACAATTGGATCTGCTCTAGTAGGATCAGCAGGAGGCCCAGTAGGTTACTGGGGAGGAGCTTTAGTTGGTTACGCCACATTCTGCTAA	MTTQTMNNFETLDLETLANVEGGGWVKCYAGTIGSALVGSAGGPVGYWGGALVGYATFC*	MTTQTMNNFETLDLETLANVEGG	GWVKCYAGTIGSALVGSAGGPVGYWGGALVGYATFC*	23	37	0.763889	3494.68	8.2049	0.936154
ICDC1	318703	318867	165	GTGGTGACATTTATGTCACTACTTTTTTG	ATGAACAATTTTGAAACACTCGATCTCGAGACACTTGCAAACGTTGAAGGTGGTGGATGGGTTAAGTGTTATGCCGGCACAATTGGATCTGCTCTAGTAGGATCAGCAGGAGGCCCAGTAGGTTACTGGGGAGGAGCTTTAGTTGGTTACGCCACATTCTGCTAA	MNNFETLDLETLANVEGGGWVKCYAGTIGSALVGSAGGPVGYWGGALVGYATFC*	MNNFETLDLETLANVEGG	GWVKCYAGTIGSALVGSAGGPVGYWGGALVGYATFC*	18	37	0.763889	3494.68	8.2049	0.936154
ICDC1	321698	321922	225	GTAGTGACATTTATGTCACTACTTTTTTG	ATGGCAACTAAAACAATTGAAAACTTTAACACCCTTGACTTCGAAACGCTTGCAAGTGTTGAAGGGGGGAAAGTCATTTATTACGGTAATGGCCTATACTGTAAATCAAATGGTGGTTGTTGGGTAGATTGGTCACAAACAATTAATTCTATTCTAACGAATTCTGCAATGAATTGGGCGACTCGCGGAAATGCTGGATGGCATTCAGGTGGTATTGCTCCATAA	MATKTIENFNTLDFETLASVEGGKVIYYGNGLYCKSNGGCWVDWSQTINSILTNSAMNWATRGNAGWHSGGIAP*	MATKTIENFNTLDFETLASVEGG	KVIYYGNGLYCKSNGGCWVDWSQTINSILTNSAMNWATRGNAGWHSGGIAP*	23	52	-0.270588	5517.59	8.74685	2.17704
ICDC1	322177	322356	180	GTAGTGACATTTATGTCACTACTTTTTTG	ATGCTTACAGAACTAACATATAACGACCTTGAAGTAACCCAAGGTGGCGCTGTTTGTCGTATGCCAAATGTGAATAGCAAAGAGGGGGACCCTCTCAAAGACGGTTGGGTATCACCACCTAAATATCGAAGCGGTGAAGCCTATCCGATGGTTTATATACCTATCTGTGCTATTATGTAA	MLTELTYNDLEVTQGGAVCRMPNVNSKEGDPLKDGWVSPPKYRSGEAYPMVYIPICAIM*	MLTELTYNDLEVTQGG	AVCRMPNVNSKEGDPLKDGWVSPPKYRSGEAYPMVYIPICAIM*	16	44	-0.22093	4781.33	8.2018	0.939932
ICDC1	321698	321922	225	GTAGTGACATTTATGTCACTACTTTTTTA	ATGGCAACTAAAACAATTGAAAACTTTAACACCCTTGACTTCGAAACGCTTGCAAGTGTTGAAGGGGGGAAAGTCATTTATTACGGTAATGGCCTATACTGTAAATCAAATGGTGGTTGTTGGGTAGATTGGTCACAAACAATTAATTCTATTCTAACGAATTCTGCAATGAATTGGGCGACTCGCGGAAATGCTGGATGGCATTCAGGTGGTATTGCTCCATAA	MATKTIENFNTLDFETLASVEGGKVIYYGNGLYCKSNGGCWVDWSQTINSILTNSAMNWATRGNAGWHSGGIAP*	MATKTIENFNTLDFETLASVEGG	KVIYYGNGLYCKSNGGCWVDWSQTINSILTNSAMNWATRGNAGWHSGGIAP*	23	52	-0.270588	5517.59	8.74685	2.17704
ICDC1	322177	322356	180	GTAGTGACATTTATGTCACTACTTTTTTA	ATGCTTACAGAACTAACATATAACGACCTTGAAGTAACCCAAGGTGGCGCTGTTTGTCGTATGCCAAATGTGAATAGCAAAGAGGGGGACCCTCTCAAAGACGGTTGGGTATCACCACCTAAATATCGAAGCGGTGAAGCCTATCCGATGGTTTATATACCTATCTGTGCTATTATGTAA	MLTELTYNDLEVTQGGAVCRMPNVNSKEGDPLKDGWVSPPKYRSGEAYPMVYIPICAIM*	MLTELTYNDLEVTQGG	AVCRMPNVNSKEGDPLKDGWVSPPKYRSGEAYPMVYIPICAIM*	16	44	-0.22093	4781.33	8.2018	0.939932
ICDC2	2094094	2094261	168	ATGGTGACATTTATGTCACTACTTTTTTA	ATGACTAAGACCATTAACAATCGTAAAAACATGACTACTCAAGAACTTGAAACTGTATCAGGTGGAGTGGTTCCTTGGGCCGCTATTTCTGTTGGCATTGCTGCTGCAAAACTGACTTATGACCTTAGCTATGCTGCAGGTAAGTCTTTCTATAACCTCACCCACTAA	MTKTINNRKNMTTQELETVSGGVVPWAAISVGIAAAKLTYDLSYAAGKSFYNLTH*	MTKTINNRKNMTTQELETVSGG	VVPWAAISVGIAAAKLTYDLSYAAGKSFYNLTH*	22	34	0.587879	3496.84	9.03496	1.23835
ICDC2	2093910	2094074	165	ATGGTGACATTTATGTCACTACTTTTTTA	ATGACAATGATTAACAAAGAAATGAAGGCAGCTGACCTAGCCTCAGTAACAGGAGGCGGATGGAAGACTAACCTTGCCATTGGAGGGCTCTGCCTAGCTTCAGGACCTATTGGAACTATGGTATGCCTTGGAGCCTACAATGGCTACATGGACTCTGCGAGATAA	MTMINKEMKAADLASVTGGGWKTNLAIGGLCLASGPIGTMVCLGAYNGYMDSAR*	MTMINKEMKAADLASVTGG	GWKTNLAIGGLCLASGPIGTMVCLGAYNGYMDSAR*	19	36	0.417143	3559.71	8.21289	0.937738
ICDC2	2093916	2094074	159	ATGGTGACATTTATGTCACTACTTTTTTA	ATGATTAACAAAGAAATGAAGGCAGCTGACCTAGCCTCAGTAACAGGAGGCGGATGGAAGACTAACCTTGCCATTGGAGGGCTCTGCCTAGCTTCAGGACCTATTGGAACTATGGTATGCCTTGGAGCCTACAATGGCTACATGGACTCTGCGAGATAA	MINKEMKAADLASVTGGGWKTNLAIGGLCLASGPIGTMVCLGAYNGYMDSAR*	MINKEMKAADLASVTGG	GWKTNLAIGGLCLASGPIGTMVCLGAYNGYMDSAR*	17	36	0.417143	3559.71	8.21289	0.937738
ICDC2	266090	266239	150	GTAGTGACATTTATGTCACTATTTTTTTG	ATGCGAACTAAGGCATATGGTGAAGAGCTCAATGCTGAAACCTTAGAAAATGTTACAGGGGGTGGTTTTGTATCTAAACCTCAAACCTTACCTGAACGATTGGGTTGGAACAAATGGTGGTTGAAAAGAAGACCTCCTTATGGCGATTAG	MRTKAYGEELNAETLENVTGGGFVSKPQTLPERLGWNKWWLKRRPPYGD*	MRTKAYGEELNAETLENVTGG	GFVSKPQTLPERLGWNKWWLKRRPPYGD*	21	29	-1.21071	3410.82	11.0904	4.00077
ICDC2	330757	330987	231	GTAGTGACATTTATGTCACTACTTTTTTG	ATGACAACACAAATCATTAACAATTTTAACTCACTTAATTCCGAAGATCTTTCTACTGTTAAGGGTGGAGCATGTAGTTTTTGGGGAGCTACAGCTGCCGTAGGCGTCGGGGCTGTTGGAGGAGCCATTAAAGGTGGTATTCAAACAGGTACTTGGCAAGGTGCAGCCTTAAAGGGTATTGGTTATGGTATTAAAGATGGGATTACTTATGGCCTTATTTGTCGTTATTAG	MTTQIINNFNSLNSEDLSTVKGGACSFWGATAAVGVGAVGGAIKGGIQTGTWQGAALKGIGYGIKDGITYGLICRY*	MTTQIINNFNSLNSEDLSTVKGG	ACSFWGATAAVGVGAVGGAIKGGIQTGTWQGAALKGIGYGIKDGITYGLICRY*	23	54	0.524528	5203.67	9.26645	2.93663
ICDC2	339364	339591	228	GTGGTGACATTCATGTCACTACTTTTTTG	ATGACAACACAAACAATTAACACTTTTGAAACACTCGATTTCGAGGCACTTGCAAACGTTGAAGGTGGAAAAGTCAATTGGGACCGTTTATCTAGTAGCGCTAGTGGTGCTGCTGAGGGAATTTATTTCTGTGCCGCATCAGGTGCTCCACTCTTTACGCTTGCACCTTATGCTATTGTAGGGTGTGGAGTTGTCGGAGCTGGTCTTGGTTATGCTTTCCCACATTAA	MTTQTINTFETLDFEALANVEGGKVNWDRLSSSASGAAEGIYFCAASGAPLFTLAPYAIVGCGVVGAGLGYAFPH*	MTTQTINTFETLDFEALANVEGG	KVNWDRLSSSASGAAEGIYFCAASGAPLFTLAPYAIVGCGVVGAGLGYAFPH*	23	53	0.630769	5188.56	7.24779	0.178455
ICDC3	2040623	2040790	168	ATGGTGACATTTATGTCACTACTTTTTTA	ATGACTAAGACCATTAACAATCGTAAAAACATGACTACTCAAGAACTTGAAACTGTATCAGGTGGAGTGGTTCCTTGGGCCGCTATTTCTGTTGGCATTGCTGCTGCAAAACTGACTTATGACCTTAGCTATGCTGCAGGTAAGTCTTTCTATAACCTCACCCACTAA	MTKTINNRKNMTTQELETVSGGVVPWAAISVGIAAAKLTYDLSYAAGKSFYNLTH*	MTKTINNRKNMTTQELETVSGG	VVPWAAISVGIAAAKLTYDLSYAAGKSFYNLTH*	22	34	0.587879	3496.84	9.03496	1.23835
ICDC3	2040439	2040603	165	ATGGTGACATTTATGTCACTACTTTTTTA	ATGACAATGATTAACAAAGAAATGAAGGCAGCTGACCTAGCCTCAGTAACAGGAGGCGGATGGAAGACTAACCTTGCCATTGGAGGGCTCTGCCTAGCTTCAGGACCTATTGGAACTATGGTATGCCTTGGAGCCTACAATGGCTACATGGACTCTGCGAGATAA	MTMINKEMKAADLASVTGGGWKTNLAIGGLCLASGPIGTMVCLGAYNGYMDSAR*	MTMINKEMKAADLASVTGG	GWKTNLAIGGLCLASGPIGTMVCLGAYNGYMDSAR*	19	36	0.417143	3559.71	8.21289	0.937738
ICDC3	2040445	2040603	159	ATGGTGACATTTATGTCACTACTTTTTTA	ATGATTAACAAAGAAATGAAGGCAGCTGACCTAGCCTCAGTAACAGGAGGCGGATGGAAGACTAACCTTGCCATTGGAGGGCTCTGCCTAGCTTCAGGACCTATTGGAACTATGGTATGCCTTGGAGCCTACAATGGCTACATGGACTCTGCGAGATAA	MINKEMKAADLASVTGGGWKTNLAIGGLCLASGPIGTMVCLGAYNGYMDSAR*	MINKEMKAADLASVTGG	GWKTNLAIGGLCLASGPIGTMVCLGAYNGYMDSAR*	17	36	0.417143	3559.71	8.21289	0.937738
ICDC3	247087	247236	150	ATAGTGACATTTATGTCACTATTTTTTTG	ATGCGAACTAAGGTATATGGCGAAGAGCTCACTGCTGAAACGTTAGAAAATGTCACAGGGGGTGATTTTGTATCTAGACCTCAAACCTTACCTGAACGATTGGGTTGGAACAAATGGTGGTTGAAAAGAAAATACCCTTATGGTGATTAA	MRTKVYGEELTAETLENVTGGDFVSRPQTLPERLGWNKWWLKRKYPYGD*	MRTKVYGEELTAETLENVTGG	DFVSRPQTLPERLGWNKWWLKRKYPYGD*	21	29	-1.31071	3534.83	10.3219	3.00077
ICDC3	310090	310320	231	GTAGTGACATTTATGTCACTACTTTTTTG	ATGACAACACAAATCATTAACAATTTTAACTCACTTAATTCCGAAGATCTTTCTACTGTTAAGGGTGGAGCATGTAGTTTTTGGGGAGCTACAGCTGCCGTAGGCGTCGGGGCTGTTGGAGGAGCCATTAAAGGTGGTATTCAAACAGGTACTTGGCAAGGTGCAGCCTTAAAGGGTATTGGTTATGGTATTAAAGATGGGATTACTTATGGCCTTATTTGTCGTTATTAG	MTTQIINNFNSLNSEDLSTVKGGACSFWGATAAVGVGAVGGAIKGGIQTGTWQGAALKGIGYGIKDGITYGLICRY*	MTTQIINNFNSLNSEDLSTVKGG	ACSFWGATAAVGVGAVGGAIKGGIQTGTWQGAALKGIGYGIKDGITYGLICRY*	23	54	0.524528	5203.67	9.26645	2.93663
ICDC3	321698	321922	225	GTGGTGACATTTATGTCACTACTTTTTTG	ATGGCAACTAAAACAATTGAAAACTTTAACACCCTTGACTTCGAAACGCTTGCAAGTGTTGAAGGGGGGAAAGTCATTTATTACGGTAATGGCCTATACTGTAAATCAAATGGTGGTTGTTGGGTAGATTGGTCACAAACAATTAATTCTATTCTAACGAATTCTGCAATGAATTGGGCGACTCGCGGAAATGCTGGATGGCATTCAGGTGGTATTGCTCCATAA	MATKTIENFNTLDFETLASVEGGKVIYYGNGLYCKSNGGCWVDWSQTINSILTNSAMNWATRGNAGWHSGGIAP*	MATKTIENFNTLDFETLASVEGG	KVIYYGNGLYCKSNGGCWVDWSQTINSILTNSAMNWATRGNAGWHSGGIAP*	23	52	-0.270588	5517.59	8.74685	2.17704
ICDC3	322177	322356	180	GTGGTGACATTTATGTCACTACTTTTTTG	ATGCTTACAGAACTAACATATAACGACCTTGAAGTAACCCAAGGTGGCGCTGTTTGTCGTATGCCAAATGTGAATAGCAAAGAGGGGGACCCTCTCAAAGACGGTTGGGTATCACCACCTAAATATCGAAGCGGTGAAGCCTATCCGATGGTTTATATACCTATCTGTGCTATTATGTAA	MLTELTYNDLEVTQGGAVCRMPNVNSKEGDPLKDGWVSPPKYRSGEAYPMVYIPICAIM*	MLTELTYNDLEVTQGG	AVCRMPNVNSKEGDPLKDGWVSPPKYRSGEAYPMVYIPICAIM*	16	44	-0.22093	4781.33	8.2018	0.939932
ICDC3	318688	318867	180	GTGGTGACATTTATGTCACTACTTTTTTG	ATGACAACACAAACAATGAACAATTTTGAAACACTCGATCTCGAGACACTTGCAAACGTTGAAGGTGGTGGATGGGTTAAGTGTTATGCCGGCACAATTGGATCTGCTCTAGTAGGATCAGCAGGAGGCCCAGTAGGTTACTGGGGAGGAGCTTTAGTTGGTTACGCCACATTCTGCTAA	MTTQTMNNFETLDLETLANVEGGGWVKCYAGTIGSALVGSAGGPVGYWGGALVGYATFC*	MTTQTMNNFETLDLETLANVEGG	GWVKCYAGTIGSALVGSAGGPVGYWGGALVGYATFC*	23	37	0.763889	3494.68	8.2049	0.936154
ICDC3	318703	318867	165	GTGGTGACATTTATGTCACTACTTTTTTG	ATGAACAATTTTGAAACACTCGATCTCGAGACACTTGCAAACGTTGAAGGTGGTGGATGGGTTAAGTGTTATGCCGGCACAATTGGATCTGCTCTAGTAGGATCAGCAGGAGGCCCAGTAGGTTACTGGGGAGGAGCTTTAGTTGGTTACGCCACATTCTGCTAA	MNNFETLDLETLANVEGGGWVKCYAGTIGSALVGSAGGPVGYWGGALVGYATFC*	MNNFETLDLETLANVEGG	GWVKCYAGTIGSALVGSAGGPVGYWGGALVGYATFC*	18	37	0.763889	3494.68	8.2049	0.936154
ICDC3	321698	321922	225	GTAGTGACATTTATGTCACTACTTTTTTG	ATGGCAACTAAAACAATTGAAAACTTTAACACCCTTGACTTCGAAACGCTTGCAAGTGTTGAAGGGGGGAAAGTCATTTATTACGGTAATGGCCTATACTGTAAATCAAATGGTGGTTGTTGGGTAGATTGGTCACAAACAATTAATTCTATTCTAACGAATTCTGCAATGAATTGGGCGACTCGCGGAAATGCTGGATGGCATTCAGGTGGTATTGCTCCATAA	MATKTIENFNTLDFETLASVEGGKVIYYGNGLYCKSNGGCWVDWSQTINSILTNSAMNWATRGNAGWHSGGIAP*	MATKTIENFNTLDFETLASVEGG	KVIYYGNGLYCKSNGGCWVDWSQTINSILTNSAMNWATRGNAGWHSGGIAP*	23	52	-0.270588	5517.59	8.74685	2.17704
ICDC3	322177	322356	180	GTAGTGACATTTATGTCACTACTTTTTTG	ATGCTTACAGAACTAACATATAACGACCTTGAAGTAACCCAAGGTGGCGCTGTTTGTCGTATGCCAAATGTGAATAGCAAAGAGGGGGACCCTCTCAAAGACGGTTGGGTATCACCACCTAAATATCGAAGCGGTGAAGCCTATCCGATGGTTTATATACCTATCTGTGCTATTATGTAA	MLTELTYNDLEVTQGGAVCRMPNVNSKEGDPLKDGWVSPPKYRSGEAYPMVYIPICAIM*	MLTELTYNDLEVTQGG	AVCRMPNVNSKEGDPLKDGWVSPPKYRSGEAYPMVYIPICAIM*	16	44	-0.22093	4781.33	8.2018	0.939932
ICDC3	321698	321922	225	GTAGTGACATTTATGTCACTACTTTTTTA	ATGGCAACTAAAACAATTGAAAACTTTAACACCCTTGACTTCGAAACGCTTGCAAGTGTTGAAGGGGGGAAAGTCATTTATTACGGTAATGGCCTATACTGTAAATCAAATGGTGGTTGTTGGGTAGATTGGTCACAAACAATTAATTCTATTCTAACGAATTCTGCAATGAATTGGGCGACTCGCGGAAATGCTGGATGGCATTCAGGTGGTATTGCTCCATAA	MATKTIENFNTLDFETLASVEGGKVIYYGNGLYCKSNGGCWVDWSQTINSILTNSAMNWATRGNAGWHSGGIAP*	MATKTIENFNTLDFETLASVEGG	KVIYYGNGLYCKSNGGCWVDWSQTINSILTNSAMNWATRGNAGWHSGGIAP*	23	52	-0.270588	5517.59	8.74685	2.17704
ICDC3	322177	322356	180	GTAGTGACATTTATGTCACTACTTTTTTA	ATGCTTACAGAACTAACATATAACGACCTTGAAGTAACCCAAGGTGGCGCTGTTTGTCGTATGCCAAATGTGAATAGCAAAGAGGGGGACCCTCTCAAAGACGGTTGGGTATCACCACCTAAATATCGAAGCGGTGAAGCCTATCCGATGGTTTATATACCTATCTGTGCTATTATGTAA	MLTELTYNDLEVTQGGAVCRMPNVNSKEGDPLKDGWVSPPKYRSGEAYPMVYIPICAIM*	MLTELTYNDLEVTQGG	AVCRMPNVNSKEGDPLKDGWVSPPKYRSGEAYPMVYIPICAIM*	16	44	-0.22093	4781.33	8.2018	0.939932
JF	1715927	1716157	231	GTAGTGACATTTATGTCACTACTTTTTTG	ATGACAACACAAATCATTAACAATTTTAACTCACTTAATTCCGAAGATCTTTCTACTGTTAAGGGTGGAGCATGTAGTTTTTGGGGAGCTACAGCTGCCGTAGGCGTCGGGGCTGTTGGAGGAGCCATTAAAGGTGGTATTCAAACAGGTACTTGGCAAGGTGCAGCCTTAAAGGGTATTGGTTATGGTATTAAAGATGGGATTACTTATGGACTTATTTGTCGTTATTAG	MTTQIINNFNSLNSEDLSTVKGGACSFWGATAAVGVGAVGGAIKGGIQTGTWQGAALKGIGYGIKDGITYGLICRY*	MTTQIINNFNSLNSEDLSTVKGG	ACSFWGATAAVGVGAVGGAIKGGIQTGTWQGAALKGIGYGIKDGITYGLICRY*	23	54	0.524528	5203.67	9.26645	2.93663
JF	1724539	1724769	231	GTAGTGACATTTATGTCACTACTTTTTTG	ATGACAACACAAACAATGAACAATTTTGAAACACTCGATCTCGAGGCACTTGCAAACGTTGAAGGTGGCGGATGTAGCTGGGGAGGTTTTGCTAAACAAGGAGTAGCTACAGGAGTTGGTAATGGTTTACGATTAGGTATCAAAACACGTACTTGGCAAGGTGCTGTCGCAGGAGCAGCCGGAGGTGCTATCGTAGGTGGTGTTGGTTATGGAGCAACATGCTGGTGGTGA	MTTQTMNNFETLDLEALANVEGGGCSWGGFAKQGVATGVGNGLRLGIKTRTWQGAVAGAAGGAIVGGVGYGATCWW*	MTTQTMNNFETLDLEALANVEGG	GCSWGGFAKQGVATGVGNGLRLGIKTRTWQGAVAGAAGGAIVGGVGYGATCWW*	23	54	0.332075	5136.57	10.2636	3.93758
JF	1724554	1724769	216	GTAGTGACATTTATGTCACTACTTTTTTG	ATGAACAATTTTGAAACACTCGATCTCGAGGCACTTGCAAACGTTGAAGGTGGCGGATGTAGCTGGGGAGGTTTTGCTAAACAAGGAGTAGCTACAGGAGTTGGTAATGGTTTACGATTAGGTATCAAAACACGTACTTGGCAAGGTGCTGTCGCAGGAGCAGCCGGAGGTGCTATCGTAGGTGGTGTTGGTTATGGAGCAACATGCTGGTGGTGA	MNNFETLDLEALANVEGGGCSWGGFAKQGVATGVGNGLRLGIKTRTWQGAVAGAAGGAIVGGVGYGATCWW*	MNNFETLDLEALANVEGG	GCSWGGFAKQGVATGVGNGLRLGIKTRTWQGAVAGAAGGAIVGGVGYGATCWW*	18	54	0.332075	5136.57	10.2636	3.93758
JF	1728555	1728713	159	GTAGTGACATTTATGTCACTACTTTTTTG	ATGGGAACTCAAACAATTGAAAACTTTAACACCCTCGACCTTGAAACACTTGCTAGTGTTGAAGGAGGACGAGTCAATTGGGAACGATGGGGAATGTGTGGGGCCTCTGTCGCCGTAGGTGCAACTATTGGAGGTGGAGTAGCCTTACTTGGCTGTTAA	MGTQTIENFNTLDLETLASVEGGRVNWERWGMCGASVAVGATIGGGVALLGC*	MGTQTIENFNTLDLETLASVEGG	RVNWERWGMCGASVAVGATIGGGVALLGC*	23	30	0.72069	2889.42	8.23143	0.939944
JF	1967964	1968131	168	ATGGTGACATTTATGTCACTACTTTTTTA	ATGACTAAGACCATTAACAATCGTAAAAACATGACTACTCAAGAACTTGAAGCTGTATCAGGTGGAGTGGTTCCTTGGGCCGCTATTTCTGTTGGCATTGCTGCTGCAAAACTGACTTATGACCTTAGCTATGCTGCAGGTAAGTCTTTCTATAACCTCACCCACTAA	MTKTINNRKNMTTQELEAVSGGVVPWAAISVGIAAAKLTYDLSYAAGKSFYNLTH*	MTKTINNRKNMTTQELEAVSGG	VVPWAAISVGIAAAKLTYDLSYAAGKSFYNLTH*	22	34	0.587879	3496.84	9.03496	1.23835
JF	1967780	1967944	165	ATGGTGACATTTATGTCACTACTTTTTTA	ATGACAGTGATTAACAAAGAAATGAAGGCAGCTGACCTAGCCTCAGTAACAGGAGGCGGATGGAAGACTAACCTTGCCATTGGAGGGCTCTGCCTAGCTTCAAGACCTATTGGAACTATGGTATGCCTTGGAGCCTACAATGGCTACATGGACTCTGCGCGATAA	MTVINKEMKAADLASVTGGGWKTNLAIGGLCLASRPIGTMVCLGAYNGYMDSAR*	MTVINKEMKAADLASVTGG	GWKTNLAIGGLCLASRPIGTMVCLGAYNGYMDSAR*	19	36	0.3	3658.79	8.77177	1.93773
JF	1967786	1967944	159	ATGGTGACATTTATGTCACTACTTTTTTA	GTGATTAACAAAGAAATGAAGGCAGCTGACCTAGCCTCAGTAACAGGAGGCGGATGGAAGACTAACCTTGCCATTGGAGGGCTCTGCCTAGCTTCAAGACCTATTGGAACTATGGTATGCCTTGGAGCCTACAATGGCTACATGGACTCTGCGCGATAA	VINKEMKAADLASVTGGGWKTNLAIGGLCLASRPIGTMVCLGAYNGYMDSAR*	VINKEMKAADLASVTGG	GWKTNLAIGGLCLASRPIGTMVCLGAYNGYMDSAR*	17	36	0.3	3658.79	8.77177	1.93773
JF	318506	318655	150	ATAGTGACATTTATGTCACTATTTTTTTG	ATGCGAACTAAGGCATATGGCGAAGAGCTCACTGCTGAAACCTTAGAAAATGTCACAGGGGGTGATTTTGTATCTAGACCTCAAACCTTACCTGAACGATTGGGTTGGAACAGATGGTGGTTGAAAAGGAAATACCCTTATGGTGATTAG	MRTKAYGEELTAETLENVTGGDFVSRPQTLPERLGWNRWWLKRKYPYGD*	MRTKAYGEELTAETLENVTGG	DFVSRPQTLPERLGWNRWWLKRKYPYGD*	21	29	-1.33214	3562.84	10.4397	3.00093
JIM8777	2049688	2049855	168	ATGGTGACATTTATGTCACTACTTTTTTA	ATGACTAAGACCATTAACAATCGTAAAAACATGACTACTCAAGAACTTGAAGCTGTATCAGGTGGAGTGGTTCCTTGGGCCGCTATTTCTGTTGGCATTGCTGCTGCAAAACTGACTTATGACCTTAGCTATGCTGCAGGTAAGTCTTTCTATAACCTCACCCACTAA	MTKTINNRKNMTTQELEAVSGGVVPWAAISVGIAAAKLTYDLSYAAGKSFYNLTH*	MTKTINNRKNMTTQELEAVSGG	VVPWAAISVGIAAAKLTYDLSYAAGKSFYNLTH*	22	34	0.587879	3496.84	9.03496	1.23835
JIM8777	2049504	2049668	165	ATGGTGACATTTATGTCACTACTTTTTTA	ATGACAATGATTAATAAAGAAATGAAGGCAGCTGACCTAGCCTCAGTAACAGGAGGCGGATGGAAGACTAACCTTGCCATTGGAGGGCTCTGCCTAGCTTCAGGACCTATTGGAACTATGATGTGCCTTGGAGCCTACAATGGCTACATGGACTCTGCGCGATAA	MTMINKEMKAADLASVTGGGWKTNLAIGGLCLASGPIGTMMCLGAYNGYMDSAR*	MTMINKEMKAADLASVTGG	GWKTNLAIGGLCLASGPIGTMMCLGAYNGYMDSAR*	19	36	0.351429	3591.68	8.21289	0.937738
JIM8777	2049510	2049668	159	ATGGTGACATTTATGTCACTACTTTTTTA	ATGATTAATAAAGAAATGAAGGCAGCTGACCTAGCCTCAGTAACAGGAGGCGGATGGAAGACTAACCTTGCCATTGGAGGGCTCTGCCTAGCTTCAGGACCTATTGGAACTATGATGTGCCTTGGAGCCTACAATGGCTACATGGACTCTGCGCGATAA	MINKEMKAADLASVTGGGWKTNLAIGGLCLASGPIGTMMCLGAYNGYMDSAR*	MINKEMKAADLASVTGG	GWKTNLAIGGLCLASGPIGTMMCLGAYNGYMDSAR*	17	36	0.351429	3591.68	8.21289	0.937738
JIM8777	252741	252890	150	ATAGTGACATTTATGTCACTATTTTTTTG	ATGCGAACTAAGGTATATGGCGAAGAGCTAACTGCTGAAACGTTAGAAAATGTCACAGGGGGTGATTTTGTATCTAGACCTCAAACCTTACCTGAACGATTGGGTTGGAACAGATGGTGGTTGAAAAGAAAATACCCTTATGGTGATTAG	MRTKVYGEELTAETLENVTGGDFVSRPQTLPERLGWNRWWLKRKYPYGD*	MRTKVYGEELTAETLENVTGG	DFVSRPQTLPERLGWNRWWLKRKYPYGD*	21	29	-1.33214	3562.84	10.4397	3.00093
JIM8777	314645	314875	231	GTAGTGACATTTATGTCACTACTTTTTTG	ATGACAACACAAATCATTAACAATTTTAACTCACTTAATTCCGAAGATCTTTCTACTGTTAAGGGTGGAGCATGTAGTTTTTGGGGAGCTACAGCTGCCGTAGGCGTCGGGGCTGTTGGAGGAGCCATTAAAGGTGGTATTCAAACAGGTACTTGGCAAGGTGCAGCCTTAAAGGGTATTGGTTATGGTATTAAAGATGGGATTACTTATGGCCTTATTTGTCGTTATTAG	MTTQIINNFNSLNSEDLSTVKGGACSFWGATAAVGVGAVGGAIKGGIQTGTWQGAALKGIGYGIKDGITYGLICRY*	MTTQIINNFNSLNSEDLSTVKGG	ACSFWGATAAVGVGAVGGAIKGGIQTGTWQGAALKGIGYGIKDGITYGLICRY*	23	54	0.524528	5203.67	9.26645	2.93663
JIM8777	323258	323488	231	GTGGTGACATTTATGTCACTACTTTTTTG	ATGACAACACAAACAATGAACACTTTTGAAACACTCGATCTCGAGACACTTGCAAACGTTGAAGGTGGCGGATGTAGCTGGGGAGGTTTTGCTAAACAAGGAGTAGCTACAGGAGTTGGTAATGGTTTACGATTAGGTATCAAAACACGTACTTGGCAAGGTGCTGTCGCAGGAGCAGCTGGAGGTGCTATCGTAGGGGGTGTTGGTTATGGAGCAACATGCTGGTGGTGA	MTTQTMNTFETLDLETLANVEGGGCSWGGFAKQGVATGVGNGLRLGIKTRTWQGAVAGAAGGAIVGGVGYGATCWW*	MTTQTMNTFETLDLETLANVEGG	GCSWGGFAKQGVATGVGNGLRLGIKTRTWQGAVAGAAGGAIVGGVGYGATCWW*	23	54	0.332075	5136.57	10.2636	3.93758
JIM8777	323273	323488	216	GTGGTGACATTTATGTCACTACTTTTTTG	ATGAACACTTTTGAAACACTCGATCTCGAGACACTTGCAAACGTTGAAGGTGGCGGATGTAGCTGGGGAGGTTTTGCTAAACAAGGAGTAGCTACAGGAGTTGGTAATGGTTTACGATTAGGTATCAAAACACGTACTTGGCAAGGTGCTGTCGCAGGAGCAGCTGGAGGTGCTATCGTAGGGGGTGTTGGTTATGGAGCAACATGCTGGTGGTGA	MNTFETLDLETLANVEGGGCSWGGFAKQGVATGVGNGLRLGIKTRTWQGAVAGAAGGAIVGGVGYGATCWW*	MNTFETLDLETLANVEGG	GCSWGGFAKQGVATGVGNGLRLGIKTRTWQGAVAGAAGGAIVGGVGYGATCWW*	18	54	0.332075	5136.57	10.2636	3.93758
JIM8777	327276	327434	159	GTAGTGACATTTATGTCACTACTTTTTTG	ATGGGAACTCAAACAATTGAAAACTTTAACACCCTCGACCTTGAAACACTTGCTAGTGTTGAAGGAGGACGAGTCAATTGGGAACGATGGGGAATGTGTGGGGCCTCTGTCGCCGTAGGTGCAACTATTGGAGGTGGAGTAGCCTTACTTGGCTGTTAA	MGTQTIENFNTLDLETLASVEGGRVNWERWGMCGASVAVGATIGGGVALLGC*	MGTQTIENFNTLDLETLASVEGG	RVNWERWGMCGASVAVGATIGGGVALLGC*	23	30	0.72069	2889.42	8.23143	0.939944
LAB813	448331	448480	150	ATAGTGACATTTATGTCACTATTTTTTTG	ATGCGAACTAAGGTATATGGCGAAGAGCTCACTGCTGAAACGTTAGAAAATGTCACAGGGGGTGATTTTGTATCTAGACCTCAAACCTTACCTGAACGATTGGGTTGGAACAAATGGTGGTTGAAAAGAAAATACCCTTATGGTGATTAA	MRTKVYGEELTAETLENVTGGDFVSRPQTLPERLGWNKWWLKRKYPYGD*	MRTKVYGEELTAETLENVTGG	DFVSRPQTLPERLGWNKWWLKRKYPYGD*	21	29	-1.31071	3534.83	10.3219	3.00077
LAB813	512752	512982	231	GTAGTGACATTTATGTCACTACTTTTTTG	ATGACAACACAAATCATTAACAATTTTAACTCACTTAATTCCGAAGATCTTTCTACTGTTAAGGGTGGAGCATGTAGTTTTTGGGGAGCTACAGCTGCCGTAGGCGTCGGGGCTGTTGGAGGAGCCATTAAAGGTGGTATTCAAACAGGCACTTGGCAAGGTGCAGCCTTAAAGGGTATTGGTTATGGTATTAAAGGTGGGATTACTTATGGCCTTACTTGTCGTTATTAG	MTTQIINNFNSLNSEDLSTVKGGACSFWGATAAVGVGAVGGAIKGGIQTGTWQGAALKGIGYGIKGGITYGLTCRY*	MTTQIINNFNSLNSEDLSTVKGG	ACSFWGATAAVGVGAVGGAIKGGIQTGTWQGAALKGIGYGIKGGITYGLTCRY*	23	54	0.484906	5133.63	9.74961	3.93583
LAB813	521356	521586	231	GTGGTGACATTTATGTCACTACTTTTTTG	ATGACAACACAAACAATGAACACTTTTGAAACACTCGATCTCGAGGCACTTGCAAACGTTGAAGGTGGTGGATGTAGCTGGGGAGGTTTTGCTAAACAAGGAGTAGCTACAGGAGTTGGTAATGGTTTACGATTAGGTATCAAAACACGTACTTGGCAAGGTGCTGTCGCAGGAGCAGCTGGAGGTGCTATCGTAGGGGGTGTTGGTTATGGAGCAACATGCTGGTGGTGA	MTTQTMNTFETLDLEALANVEGGGCSWGGFAKQGVATGVGNGLRLGIKTRTWQGAVAGAAGGAIVGGVGYGATCWW*	MTTQTMNTFETLDLEALANVEGG	GCSWGGFAKQGVATGVGNGLRLGIKTRTWQGAVAGAAGGAIVGGVGYGATCWW*	23	54	0.332075	5136.57	10.2636	3.93758
LAB813	521371	521586	216	GTGGTGACATTTATGTCACTACTTTTTTG	ATGAACACTTTTGAAACACTCGATCTCGAGGCACTTGCAAACGTTGAAGGTGGTGGATGTAGCTGGGGAGGTTTTGCTAAACAAGGAGTAGCTACAGGAGTTGGTAATGGTTTACGATTAGGTATCAAAACACGTACTTGGCAAGGTGCTGTCGCAGGAGCAGCTGGAGGTGCTATCGTAGGGGGTGTTGGTTATGGAGCAACATGCTGGTGGTGA	MNTFETLDLEALANVEGGGCSWGGFAKQGVATGVGNGLRLGIKTRTWQGAVAGAAGGAIVGGVGYGATCWW*	MNTFETLDLEALANVEGG	GCSWGGFAKQGVATGVGNGLRLGIKTRTWQGAVAGAAGGAIVGGVGYGATCWW*	18	54	0.332075	5136.57	10.2636	3.93758
LAB813	2122422	2122589	168	ATGGTGACATTTATGTCACTACTTTTTTA	ATGACTAAGACCATTAACAATCGTAAAAACATGACTACTCAAGAACTTGAAGCTGTATCAGGTGGAGTAGTTCCTTGGGCCGCTATTTCTGTTGGCATCGCTGCTGCAAAACTGACTTATGACCTTAGCTATGCTGCAGGTAAGTCTTTCTATAACCTCACCCACTAA	MTKTINNRKNMTTQELEAVSGGVVPWAAISVGIAAAKLTYDLSYAAGKSFYNLTH*	MTKTINNRKNMTTQELEAVSGG	VVPWAAISVGIAAAKLTYDLSYAAGKSFYNLTH*	22	34	0.587879	3496.84	9.03496	1.23835
LAB813	2122238	2122402	165	ATGGTGACATTTATGTCACTACTTTTTTA	ATGACAATGATTAACAAAGAAATGAAGGCAGCTGACCTAGTCTCAGTAACAGGAGGAGGATGGAAGACTAACCTTGCCATTGGAGGGCTCTGCCTAGCTTCAGGACCTATTGGAACGATGGTATGCCTTGGAGCCTACAATGGCTACATGGACTCTGCGCGATAA	MTMINKEMKAADLVSVTGGGWKTNLAIGGLCLASGPIGTMVCLGAYNGYMDSAR*	MTMINKEMKAADLVSVTGG	GWKTNLAIGGLCLASGPIGTMVCLGAYNGYMDSAR*	19	36	0.417143	3559.71	8.21289	0.937738
LAB813	2122244	2122402	159	ATGGTGACATTTATGTCACTACTTTTTTA	ATGATTAACAAAGAAATGAAGGCAGCTGACCTAGTCTCAGTAACAGGAGGAGGATGGAAGACTAACCTTGCCATTGGAGGGCTCTGCCTAGCTTCAGGACCTATTGGAACGATGGTATGCCTTGGAGCCTACAATGGCTACATGGACTCTGCGCGATAA	MINKEMKAADLVSVTGGGWKTNLAIGGLCLASGPIGTMVCLGAYNGYMDSAR*	MINKEMKAADLVSVTGG	GWKTNLAIGGLCLASGPIGTMVCLGAYNGYMDSAR*	17	36	0.417143	3559.71	8.21289	0.937738
NCTC7366	2023931	2024098	168	ATGGTGACATTTATGTCACTACTTTTTTA	ATGACTAAGACCATTAACAATCGTAAAAACATGACTACTCAAGAACTTGAAACTGTATCAGGTGGAGTGGTTCCTTGGGCCGCTATTTCTGTTGGCATTGCTGCTGCAAAACTGACTTATGACCTTAGCTATGCTGCAGGTAAGTCTTTCTATAACCTCACCCACTAA	MTKTINNRKNMTTQELETVSGGVVPWAAISVGIAAAKLTYDLSYAAGKSFYNLTH*	MTKTINNRKNMTTQELETVSGG	VVPWAAISVGIAAAKLTYDLSYAAGKSFYNLTH*	22	34	0.587879	3496.84	9.03496	1.23835
NCTC7366	2023747	2023911	165	ATGGTGACATTTATGTCACTACTTTTTTA	ATGACAATGATTAACAAAGAAATGAAGGCAGCTGACCTAGCCTCAGTAACAGGAGGCGGATGGAAGACTAACCTTGCCATTGGAGGGCTCTGCCTAGCTTCAGGACCTATTGGAACTATGGTATGCCTTGGAGCCTACAATGGCTACATGGACTCTGCGAGATAA	MTMINKEMKAADLASVTGGGWKTNLAIGGLCLASGPIGTMVCLGAYNGYMDSAR*	MTMINKEMKAADLASVTGG	GWKTNLAIGGLCLASGPIGTMVCLGAYNGYMDSAR*	19	36	0.417143	3559.71	8.21289	0.937738
NCTC7366	2023753	2023911	159	ATGGTGACATTTATGTCACTACTTTTTTA	ATGATTAACAAAGAAATGAAGGCAGCTGACCTAGCCTCAGTAACAGGAGGCGGATGGAAGACTAACCTTGCCATTGGAGGGCTCTGCCTAGCTTCAGGACCTATTGGAACTATGGTATGCCTTGGAGCCTACAATGGCTACATGGACTCTGCGAGATAA	MINKEMKAADLASVTGGGWKTNLAIGGLCLASGPIGTMVCLGAYNGYMDSAR*	MINKEMKAADLASVTGG	GWKTNLAIGGLCLASGPIGTMVCLGAYNGYMDSAR*	17	36	0.417143	3559.71	8.21289	0.937738
NCTC7366	257009	257158	150	ATAGTGACATTTATGTCACTATTTTTTTG	ATGCGAACTAAGGTATATGGCGAAGAGCTCACTGCTGAAACGTTAGAAAATGTCACAGGGGGTGATTTTGTATCTAGACCTCAAACCTTACCTGAACGATTGGGTTGGAACAAATGGTGGTTGAAAAGAAAATACCCTTATGGTGATTAA	MRTKVYGEELTAETLENVTGGDFVSRPQTLPERLGWNKWWLKRKYPYGD*	MRTKVYGEELTAETLENVTGG	DFVSRPQTLPERLGWNKWWLKRKYPYGD*	21	29	-1.31071	3534.83	10.3219	3.00077
NCTC7366	326434	326670	237	GTGGTGACATTAATGTCACTACTTTTTTG	ATGACAACACAAATCATTAACAATTTTAATTCACTTAATTCCGAAGATCTTTCTATTATCGAAGGTGGGGGTGTGATTGGTTGTGTAGCTGGGACTGCTGGATCTGCTGGGCTTGGATTTTTGACTGGAACATCAGTTGGAACTGTTACATTTCCAATTGTTGGGACTGTTTCAGGTGGAGCATTTGGGGCATGGTCAGGAGCTGGCCTTGGAATGGCTACATTTTGCGGAGTTTAG	MTTQIINNFNSLNSEDLSIIEGGGVIGCVAGTAGSAGLGFLTGTSVGTVTFPIVGTVSGGAFGAWSGAGLGMATFCGV*	MTTQIINNFNSLNSEDLSIIEGG	GVIGCVAGTAGSAGLGFLTGTSVGTVTFPIVGTVSGGAFGAWSGAGLGMATFCGV*	23	56	1.15455	4950.44	5.826	-0.0613069
NCTC7366	335561	335794	234	GTGGTGACATTTATGTCACTACTTTTTTG	ATGATAACACAAACAATGAACAATTTTGAAACACTCGATCTTGAGGCACTTGCAAACGTTGAAGGTGGAAATAGATGTAAAGATTTAATCTTTGGAGGAGCTTTAACTGGCGCAGGTGCTGGATTTACAGGTGGTATGGCAGCATTTGGTGTTACAGCATTTCCAGGAGCATTTGTAGGAGCACATGTTGGAGCAGTTGCTGGTGGGCTAGCATGTATCGGAGCGAGCTTTTAG	MITQTMNNFETLDLEALANVEGGNRCKDLIFGGALTGAGAGFTGGMAAFGVTAFPGAFVGAHVGAVAGGLACIGASF*	MITQTMNNFETLDLEALANVEGG	NRCKDLIFGGALTGAGAGFTGGMAAFGVTAFPGAFVGAHVGAVAGGLACIGASF*	23	55	0.996296	4987.47	8.24126	1.17958
NCTC7366	335576	335794	219	GTGGTGACATTTATGTCACTACTTTTTTG	ATGAACAATTTTGAAACACTCGATCTTGAGGCACTTGCAAACGTTGAAGGTGGAAATAGATGTAAAGATTTAATCTTTGGAGGAGCTTTAACTGGCGCAGGTGCTGGATTTACAGGTGGTATGGCAGCATTTGGTGTTACAGCATTTCCAGGAGCATTTGTAGGAGCACATGTTGGAGCAGTTGCTGGTGGGCTAGCATGTATCGGAGCGAGCTTTTAG	MNNFETLDLEALANVEGGNRCKDLIFGGALTGAGAGFTGGMAAFGVTAFPGAFVGAHVGAVAGGLACIGASF*	MNNFETLDLEALANVEGG	NRCKDLIFGGALTGAGAGFTGGMAAFGVTAFPGAFVGAHVGAVAGGLACIGASF*	18	55	0.996296	4987.47	8.24126	1.17958
NCTC7366	335807	335995	189	GTGGTGACATTTATGTCACTACTTTTTTG	ATGAATGTGACTAAGTATAATAAGATGTGCGATGCTGAGCTAGAAATTATTTCTGGTGGTGGGAAAGTTGGAGCAGTAATTGGTGGCTGTCTAGGTGGTATGCTCATGGCATGGGCAGCAGGACCTGTTTCCGCAGGGGGTTATACTATGATATGTGCTACTTCGGGGCTTGCAAATGCTTATTTTTGA	MNVTKYNKMCDAELEIISGGGKVGAVIGGCLGGMLMAWAAGPVSAGGYTMICATSGLANAYF*	MNVTKYNKMCDAELEIISGG	GKVGAVIGGCLGGMLMAWAAGPVSAGGYTMICATSGLANAYF*	20	43	0.985714	3992.91	8.21291	0.936947
NCTC7366	335813	335995	183	GTGGTGACATTTATGTCACTACTTTTTTG	GTGACTAAGTATAATAAGATGTGCGATGCTGAGCTAGAAATTATTTCTGGTGGTGGGAAAGTTGGAGCAGTAATTGGTGGCTGTCTAGGTGGTATGCTCATGGCATGGGCAGCAGGACCTGTTTCCGCAGGGGGTTATACTATGATATGTGCTACTTCGGGGCTTGCAAATGCTTATTTTTGA	VTKYNKMCDAELEIISGGGKVGAVIGGCLGGMLMAWAAGPVSAGGYTMICATSGLANAYF*	VTKYNKMCDAELEIISGG	GKVGAVIGGCLGGMLMAWAAGPVSAGGYTMICATSGLANAYF*	18	43	0.985714	3992.91	8.21291	0.936947
NCTC7366	335055	335234	180	GTGGTGACATTTATGTCACTACTTTTTTG	ATGACAACACAAACAATGAACACTTTTGAAACACTCGATCTCGAGGCACTTGCAAACGTTGAAGGTGGCGGATGGGTTAAGTGTTATGCCGGCACAATTGGCTCTGCTCTAGTAGGATCAGCAGGAGGCCCAGTAGGTTACTGGGGAGGAGCTTTAGTTGGTTACGCTACATTCTGCTAA	MTTQTMNTFETLDLEALANVEGGGWVKCYAGTIGSALVGSAGGPVGYWGGALVGYATFC*	MTTQTMNTFETLDLEALANVEGG	GWVKCYAGTIGSALVGSAGGPVGYWGGALVGYATFC*	23	37	0.763889	3494.68	8.2049	0.936154
NCTC7366	335070	335234	165	GTGGTGACATTTATGTCACTACTTTTTTG	ATGAACACTTTTGAAACACTCGATCTCGAGGCACTTGCAAACGTTGAAGGTGGCGGATGGGTTAAGTGTTATGCCGGCACAATTGGCTCTGCTCTAGTAGGATCAGCAGGAGGCCCAGTAGGTTACTGGGGAGGAGCTTTAGTTGGTTACGCTACATTCTGCTAA	MNTFETLDLEALANVEGGGWVKCYAGTIGSALVGSAGGPVGYWGGALVGYATFC*	MNTFETLDLEALANVEGG	GWVKCYAGTIGSALVGSAGGPVGYWGGALVGYATFC*	18	37	0.763889	3494.68	8.2049	0.936154
NCTC7366	335561	335794	234	GTGGTGACATTTATGTCACTACTTTTTTG	ATGATAACACAAACAATGAACAATTTTGAAACACTCGATCTTGAGGCACTTGCAAACGTTGAAGGTGGAAATAGATGTAAAGATTTAATCTTTGGAGGAGCTTTAACTGGCGCAGGTGCTGGATTTACAGGTGGTATGGCAGCATTTGGTGTTACAGCATTTCCAGGAGCATTTGTAGGAGCACATGTTGGAGCAGTTGCTGGTGGGCTAGCATGTATCGGAGCGAGCTTTTAG	MITQTMNNFETLDLEALANVEGGNRCKDLIFGGALTGAGAGFTGGMAAFGVTAFPGAFVGAHVGAVAGGLACIGASF*	MITQTMNNFETLDLEALANVEGG	NRCKDLIFGGALTGAGAGFTGGMAAFGVTAFPGAFVGAHVGAVAGGLACIGASF*	23	55	0.996296	4987.47	8.24126	1.17958
NCTC7366	335576	335794	219	GTGGTGACATTTATGTCACTACTTTTTTG	ATGAACAATTTTGAAACACTCGATCTTGAGGCACTTGCAAACGTTGAAGGTGGAAATAGATGTAAAGATTTAATCTTTGGAGGAGCTTTAACTGGCGCAGGTGCTGGATTTACAGGTGGTATGGCAGCATTTGGTGTTACAGCATTTCCAGGAGCATTTGTAGGAGCACATGTTGGAGCAGTTGCTGGTGGGCTAGCATGTATCGGAGCGAGCTTTTAG	MNNFETLDLEALANVEGGNRCKDLIFGGALTGAGAGFTGGMAAFGVTAFPGAFVGAHVGAVAGGLACIGASF*	MNNFETLDLEALANVEGG	NRCKDLIFGGALTGAGAGFTGGMAAFGVTAFPGAFVGAHVGAVAGGLACIGASF*	18	55	0.996296	4987.47	8.24126	1.17958
NCTC7366	335807	335995	189	GTGGTGACATTTATGTCACTACTTTTTTG	ATGAATGTGACTAAGTATAATAAGATGTGCGATGCTGAGCTAGAAATTATTTCTGGTGGTGGGAAAGTTGGAGCAGTAATTGGTGGCTGTCTAGGTGGTATGCTCATGGCATGGGCAGCAGGACCTGTTTCCGCAGGGGGTTATACTATGATATGTGCTACTTCGGGGCTTGCAAATGCTTATTTTTGA	MNVTKYNKMCDAELEIISGGGKVGAVIGGCLGGMLMAWAAGPVSAGGYTMICATSGLANAYF*	MNVTKYNKMCDAELEIISGG	GKVGAVIGGCLGGMLMAWAAGPVSAGGYTMICATSGLANAYF*	20	43	0.985714	3992.91	8.21291	0.936947
NCTC7366	335813	335995	183	GTGGTGACATTTATGTCACTACTTTTTTG	GTGACTAAGTATAATAAGATGTGCGATGCTGAGCTAGAAATTATTTCTGGTGGTGGGAAAGTTGGAGCAGTAATTGGTGGCTGTCTAGGTGGTATGCTCATGGCATGGGCAGCAGGACCTGTTTCCGCAGGGGGTTATACTATGATATGTGCTACTTCGGGGCTTGCAAATGCTTATTTTTGA	VTKYNKMCDAELEIISGGGKVGAVIGGCLGGMLMAWAAGPVSAGGYTMICATSGLANAYF*	VTKYNKMCDAELEIISGG	GKVGAVIGGCLGGMLMAWAAGPVSAGGYTMICATSGLANAYF*	18	43	0.985714	3992.91	8.21291	0.936947
NCTC8618	2054460	2054627	168	ATGGTGACATTTATGTCACTACTTTTTTA	ATGACTAAGACCATTAACAATCGTAAAAACATGACTACTCAAGAACTTGAAGCTGTATCAGGTGGAGTGGTTCCTTGGGCCGCTATTTCTGTTGGCATTGCTGCTGCAAAACTGACTTATGACCTTAGCTATGCTGCAGGTAAGTCTTTCTATAACCTCACCCACTAA	MTKTINNRKNMTTQELEAVSGGVVPWAAISVGIAAAKLTYDLSYAAGKSFYNLTH*	MTKTINNRKNMTTQELEAVSGG	VVPWAAISVGIAAAKLTYDLSYAAGKSFYNLTH*	22	34	0.587879	3496.84	9.03496	1.23835
NCTC8618	2054276	2054440	165	ATGGTGACATTTATGTCACTACTTTTTTA	ATGACAGTGATTAACAAAGAAATGAAGGCAGCTGACCTAGCCTCAGTAACAGGAGGCGGATGGAAGACTAACCTTGCCATTGGAGGGCTCTGCCTAGCTTCAAGACCTATTGGAACTATGGTATGCCTTGGAGCCTACAATGGCTACATGGACTCTGCGCGATAA	MTVINKEMKAADLASVTGGGWKTNLAIGGLCLASRPIGTMVCLGAYNGYMDSAR*	MTVINKEMKAADLASVTGG	GWKTNLAIGGLCLASRPIGTMVCLGAYNGYMDSAR*	19	36	0.3	3658.79	8.77177	1.93773
NCTC8618	2054282	2054440	159	ATGGTGACATTTATGTCACTACTTTTTTA	GTGATTAACAAAGAAATGAAGGCAGCTGACCTAGCCTCAGTAACAGGAGGCGGATGGAAGACTAACCTTGCCATTGGAGGGCTCTGCCTAGCTTCAAGACCTATTGGAACTATGGTATGCCTTGGAGCCTACAATGGCTACATGGACTCTGCGCGATAA	VINKEMKAADLASVTGGGWKTNLAIGGLCLASRPIGTMVCLGAYNGYMDSAR*	VINKEMKAADLASVTGG	GWKTNLAIGGLCLASRPIGTMVCLGAYNGYMDSAR*	17	36	0.3	3658.79	8.77177	1.93773
NCTC8618	249906	250055	150	ATAGTGACATTTATGTCACTATTTTTTTG	ATGCGAACTAAGGCATATGGCGAAGAGCTCACTGCTGAAACCTTAGAAAATGTCACAGGGGGTGATTTTGTATCTAGACCTCAAACCTTACCTGAACGATTGGGTTGGAACAGATGGTGGTTGAAAAGGAAATACCCTTATGGTGATTAG	MRTKAYGEELTAETLENVTGGDFVSRPQTLPERLGWNRWWLKRKYPYGD*	MRTKAYGEELTAETLENVTGG	DFVSRPQTLPERLGWNRWWLKRKYPYGD*	21	29	-1.33214	3562.84	10.4397	3.00093
NCTC8618	313658	313888	231	GTAGTGACATTTATGTCACTACTTTTTTG	ATGACAACACAAATCATTAACAATTTTAACTCACTTAATTCCGAAGATCTTTCTACTGTTAAGGGTGGAGCATGTAGTTTTTGGGGAGCTACAGCTGCCGTAGGCGTCGGGGCTGTTGGAGGAGCCATTAAAGGTGGTATTCAAACAGGTACTTGGCAAGGTGCAGCCTTAAAGGGTATTGGTTATGGTATTAAAGATGGGATTACTTATGGACTTATTTGTCGTTATTAG	MTTQIINNFNSLNSEDLSTVKGGACSFWGATAAVGVGAVGGAIKGGIQTGTWQGAALKGIGYGIKDGITYGLICRY*	MTTQIINNFNSLNSEDLSTVKGG	ACSFWGATAAVGVGAVGGAIKGGIQTGTWQGAALKGIGYGIKDGITYGLICRY*	23	54	0.524528	5203.67	9.26645	2.93663
NCTC8618	322270	322500	231	GTAGTGACATTTATGTCACTACTTTTTTG	ATGACAACACAAACAATGAACAATTTTGAAACACTCGATCTCGAGGCACTTGCAAACGTTGAAGGTGGCGGATGTAGCTGGGGAGGTTTTGCTAAACAAGGAGTAGCTACAGGAGTTGGTAATGGTTTACGATTAGGTATCAAAACACGTACTTGGCAAGGTGCTGTCGCAGGAGCAGCCGGAGGTGCTATCGTAGGTGGTGTTGGTTATGGAGCAACATGCTGGTGGTGA	MTTQTMNNFETLDLEALANVEGGGCSWGGFAKQGVATGVGNGLRLGIKTRTWQGAVAGAAGGAIVGGVGYGATCWW*	MTTQTMNNFETLDLEALANVEGG	GCSWGGFAKQGVATGVGNGLRLGIKTRTWQGAVAGAAGGAIVGGVGYGATCWW*	23	54	0.332075	5136.57	10.2636	3.93758
NCTC8618	322285	322500	216	GTAGTGACATTTATGTCACTACTTTTTTG	ATGAACAATTTTGAAACACTCGATCTCGAGGCACTTGCAAACGTTGAAGGTGGCGGATGTAGCTGGGGAGGTTTTGCTAAACAAGGAGTAGCTACAGGAGTTGGTAATGGTTTACGATTAGGTATCAAAACACGTACTTGGCAAGGTGCTGTCGCAGGAGCAGCCGGAGGTGCTATCGTAGGTGGTGTTGGTTATGGAGCAACATGCTGGTGGTGA	MNNFETLDLEALANVEGGGCSWGGFAKQGVATGVGNGLRLGIKTRTWQGAVAGAAGGAIVGGVGYGATCWW*	MNNFETLDLEALANVEGG	GCSWGGFAKQGVATGVGNGLRLGIKTRTWQGAVAGAAGGAIVGGVGYGATCWW*	18	54	0.332075	5136.57	10.2636	3.93758
NCTC8618	326286	326444	159	GTAGTGACATTTATGTCACTACTTTTTTG	ATGGGAACTCAAACAATTGAAAACTTTAACACCCTCGACCTTGAAACACTTGCTAGTGTTGAAGGAGGACGAGTCAATTGGGAACGATGGGGAATGTGTGGGGCCTCTGTCGCCGTAGGTGCAACTATTGGAGGTGGAGTAGCCTTACTTGGCTGTTAA	MGTQTIENFNTLDLETLASVEGGRVNWERWGMCGASVAVGATIGGGVALLGC*	MGTQTIENFNTLDLETLASVEGG	RVNWERWGMCGASVAVGATIGGGVALLGC*	23	30	0.72069	2889.42	8.23143	0.939944
SALI-10	975016	975183	168	ATGGTGACATTTATGTCACTACTTTTTTA	ATGACTAAGACCATTAACAATCGTAAAAACATGACTACTCAAGAACTTGAAGCTGTATCAGGTGGAGTGGTTCCTTGGGCCGCTATTTCTGTTGGCATTGCTGCTGCAAAACTGACTTATGACCTTAGCTATGCTGCAGGTAAGTCTTTCTATAACCTCATCCACTAA	MTKTINNRKNMTTQELEAVSGGVVPWAAISVGIAAAKLTYDLSYAAGKSFYNLIH*	MTKTINNRKNMTTQELEAVSGG	VVPWAAISVGIAAAKLTYDLSYAAGKSFYNLIH*	22	34	0.745455	3508.88	9.03496	1.23835
SALI-10	974831	974995	165	ATGGTGACATTTATGTCACTACTTTTTTA	ATGACAATGATTAACAAAGAAATAAAGGTAGCTGACCTAGCCTCAGTAACAGGAGGCGGATGGAAGACCAACCTTGCCATTGGAGGGCTCTGCCTAGCTTCAGGACCTATTGGAACTATGGTATGCCTTGGAGCCTACAATGGCTACATGGACTCTGCACGATGA	MTMINKEIKVADLASVTGGGWKTNLAIGGLCLASGPIGTMVCLGAYNGYMDSAR*	MTMINKEIKVADLASVTGG	GWKTNLAIGGLCLASGPIGTMVCLGAYNGYMDSAR*	19	36	0.417143	3559.71	8.21289	0.937738
SALI-10	974837	974995	159	ATGGTGACATTTATGTCACTACTTTTTTA	ATGATTAACAAAGAAATAAAGGTAGCTGACCTAGCCTCAGTAACAGGAGGCGGATGGAAGACCAACCTTGCCATTGGAGGGCTCTGCCTAGCTTCAGGACCTATTGGAACTATGGTATGCCTTGGAGCCTACAATGGCTACATGGACTCTGCACGATGA	MINKEIKVADLASVTGGGWKTNLAIGGLCLASGPIGTMVCLGAYNGYMDSAR*	MINKEIKVADLASVTGG	GWKTNLAIGGLCLASGPIGTMVCLGAYNGYMDSAR*	17	36	0.417143	3559.71	8.21289	0.937738
SALI-10	1170104	1170298	195	ATGGTGACATTTATGTCACTATTTTTTGT	ATGGTATTGAATTTAGAAAATGTAAACTGTGTTACTCTTCAAGATGAAGAATTAATGATGGTTAACGGAGGTCTCGCACCGATTGTTATTGGTGGAGTTGTCGTAGGTTGGAAGGTCATTGGTGGAGTGGCAGGTGTTATAGCAGCAAGTGGTGCTGCAGGGATTGCTGCAGGATATTATGCTAATCGTCCGTAA	MVLNLENVNCVTLQDEELMMVNGGLAPIVIGGVVVGWKVIGGVAGVIAASGAAGIAAGYYANRP*	MVLNLENVNCVTLQDEELMMVNGG	LAPIVIGGVVVGWKVIGGVAGVIAASGAAGIAAGYYANRP*	24	41	1.2225	3734.1	10.0086	1.99825
SALI-10	1170110	1170298	189	ATGGTGACATTTATGTCACTATTTTTTGT	TTGAATTTAGAAAATGTAAACTGTGTTACTCTTCAAGATGAAGAATTAATGATGGTTAACGGAGGTCTCGCACCGATTGTTATTGGTGGAGTTGTCGTAGGTTGGAAGGTCATTGGTGGAGTGGCAGGTGTTATAGCAGCAAGTGGTGCTGCAGGGATTGCTGCAGGATATTATGCTAATCGTCCGTAA	LNLENVNCVTLQDEELMMVNGGLAPIVIGGVVVGWKVIGGVAGVIAASGAAGIAAGYYANRP*	LNLENVNCVTLQDEELMMVNGG	LAPIVIGGVVVGWKVIGGVAGVIAASGAAGIAAGYYANRP*	22	41	1.2225	3734.1	10.0086	1.99825
SALI-10	1170518	1170673	156	ATGGTGACATTTATGTCACTATTTTTTGT	ATGTCTAAAAAATATGAGTTGACTAAAAAAGAATTGCAGGAAATTGAAGGTGGTGTTGCACCAATTATGGTTGCTATTGGTTTAGGAAGTCTAGCAGTAGCATCATTTAGTTCAGGATATAAATTTGGAACAGATTTAGCTAGACGTGGACGATAG	MSKKYELTKKELQEIEGGVAPIMVAIGLGSLAVASFSSGYKFGTDLARRGR*	MSKKYELTKKELQEIEGG	VAPIMVAIGLGSLAVASFSSGYKFGTDLARRGR*	18	34	0.6	3366.82	11.4308	2.99983
SALI-10	1289322	1289552	231	GTAGTGACATTTATGTCACTACTTTTTTG	ATGACAACACAAATCATTAACAATTTTAACTCACTTAATTCCGAAGATCTTTCTACTGTTAAGGGTGGAGCATGTAGTTTTTGGGGAGCTACAGCTGCCGTAGGCGTCGGGGCTGTTGGAGGAGCCATTAAAGGTGGTATTCAAACAGGTACTTGGCAAGGTGCAGCCTTAAAGGGTATTGGTTATGGTATTAAAGATGGGATTACTTATGGCCTTATTTGTCGTTATTAG	MTTQIINNFNSLNSEDLSTVKGGACSFWGATAAVGVGAVGGAIKGGIQTGTWQGAALKGIGYGIKDGITYGLICRY*	MTTQIINNFNSLNSEDLSTVKGG	ACSFWGATAAVGVGAVGGAIKGGIQTGTWQGAALKGIGYGIKDGITYGLICRY*	23	54	0.524528	5203.67	9.26645	2.93663
SALI-10	1297931	1298161	231	GTGGTGACATACATGTCACTACTTTTTTG	ATGACAACACAAACAATGAACAATTTTGAAACACTCGATCTCGAGGCACTTGCAAACGTTGAAGGTGGCGGATGTAGCTGGGGAGGTTTTGCTAAACAAGGAGTAGCTACAGGAGTTGGTAATGGTTTACGATTAGGTATCAAAACACGTACTTGGCAAGGTGCTGTCGCAGGAGCAGCTGGAGGTGCTATCGTAGGGGGTGTTGGTTATGGAGCAACATGCTGGTGGTGA	MTTQTMNNFETLDLEALANVEGGGCSWGGFAKQGVATGVGNGLRLGIKTRTWQGAVAGAAGGAIVGGVGYGATCWW*	MTTQTMNNFETLDLEALANVEGG	GCSWGGFAKQGVATGVGNGLRLGIKTRTWQGAVAGAAGGAIVGGVGYGATCWW*	23	54	0.332075	5136.57	10.2636	3.93758
SALI-10	1297946	1298161	216	GTGGTGACATACATGTCACTACTTTTTTG	ATGAACAATTTTGAAACACTCGATCTCGAGGCACTTGCAAACGTTGAAGGTGGCGGATGTAGCTGGGGAGGTTTTGCTAAACAAGGAGTAGCTACAGGAGTTGGTAATGGTTTACGATTAGGTATCAAAACACGTACTTGGCAAGGTGCTGTCGCAGGAGCAGCTGGAGGTGCTATCGTAGGGGGTGTTGGTTATGGAGCAACATGCTGGTGGTGA	MNNFETLDLEALANVEGGGCSWGGFAKQGVATGVGNGLRLGIKTRTWQGAVAGAAGGAIVGGVGYGATCWW*	MNNFETLDLEALANVEGG	GCSWGGFAKQGVATGVGNGLRLGIKTRTWQGAVAGAAGGAIVGGVGYGATCWW*	18	54	0.332075	5136.57	10.2636	3.93758
1001175st1_H3	1066754	1066921	168	ATGGTGACATTTATGTCACTACTTTTTTA	ATGACTAAGACCATTAACAATCGTAAAAACATGACTACTCAAGAACTTGAAACTGTATCAGGTGGAGTGGTTCCTTGGGCCGCTATTTCTGTTGGCATTGCTGCTGCAAAACTGACTTATGACCTTAGCTATGCTGCAGGTAAGTCTTTCTATAACCTCACCCACTAA	MTKTINNRKNMTTQELETVSGGVVPWAAISVGIAAAKLTYDLSYAAGKSFYNLTH*	MTKTINNRKNMTTQELETVSGG	VVPWAAISVGIAAAKLTYDLSYAAGKSFYNLTH*	22	34	0.587879	3496.84	9.03496	1.23835
1001175st1_H3	1066570	1066734	165	ATGGTGACATTTATGTCACTACTTTTTTA	ATGACAATGATTAACAAAGAAATGAAGGCAGCTGACCTAGCCTCAGTAACAGGAGGCGGATGGAAGACTAACCTTGCCATTGGAGGGCTCTGCCTAGCTTCAGGACCTATTGGAACTATGGTATGCCTTGGAGCCTACAATGGCTACATGGACTCTGCGAGATAA	MTMINKEMKAADLASVTGGGWKTNLAIGGLCLASGPIGTMVCLGAYNGYMDSAR*	MTMINKEMKAADLASVTGG	GWKTNLAIGGLCLASGPIGTMVCLGAYNGYMDSAR*	19	36	0.417143	3559.71	8.21289	0.937738
1001175st1_H3	1066576	1066734	159	ATGGTGACATTTATGTCACTACTTTTTTA	ATGATTAACAAAGAAATGAAGGCAGCTGACCTAGCCTCAGTAACAGGAGGCGGATGGAAGACTAACCTTGCCATTGGAGGGCTCTGCCTAGCTTCAGGACCTATTGGAACTATGGTATGCCTTGGAGCCTACAATGGCTACATGGACTCTGCGAGATAA	MINKEMKAADLASVTGGGWKTNLAIGGLCLASGPIGTMVCLGAYNGYMDSAR*	MINKEMKAADLASVTGG	GWKTNLAIGGLCLASGPIGTMVCLGAYNGYMDSAR*	17	36	0.417143	3559.71	8.21289	0.937738
1001175st1_H3	1870157	1870315	159	GTAGTGACATTTATGTCACTACTTTTTTG	ATGGGAACTCAAACAATTGAAAACTTTAACACCCTCGACCTTGAAACACTTGCTAGTGTTGAAGGAGGACGAGTCAATTGGGAACGATGGGGAATGTGTGGGGCCTCTGTCGCCGTAGGTGCAACTATTGGAGGTGGAGTAGCCTTACTTGGCTGTTAA	MGTQTIENFNTLDLETLASVEGGRVNWERWGMCGASVAVGATIGGGVALLGC*	MGTQTIENFNTLDLETLASVEGG	RVNWERWGMCGASVAVGATIGGGVALLGC*	23	30	0.72069	2889.42	8.23143	0.939944
1001175st1_H3	1627584	1627733	150	ATAGTGACATTTATGTCACTATTTTTTTG	ATGCGAACTAAGGTATATGGCGAAGAGCTCACTGCTGAAACGTTAGAAAATGTCACAGGGGGTGATTTTGTATCTAGACCTCAAACCTTACCTGAACGATTGGGTTGGAACAAATGGTGGTTGAAAAGAAAATACCCTTATGGTGATTAA	MRTKVYGEELTAETLENVTGGDFVSRPQTLPERLGWNKWWLKRKYPYGD*	MRTKVYGEELTAETLENVTGG	DFVSRPQTLPERLGWNKWWLKRKYPYGD*	21	29	-1.31071	3534.83	10.3219	3.00077
1001175st1_H3	1931033	1931263	231	GTAGTGACATTTATGTCACTACTTTTTTG	ATGACAACACAAATCATTAACAATTTTAACTCACTTAATTCCGAAGATCTTTCTACTGTTAAGGGTGGAGCATGTAGTTTTTGGGGAGCTACAGCTGCCGTAGGCGTCGGGGCTGTTGGAGGAGCCATTAAAGGTGGTATTCAAACAGGCACTTGGCAAGGTGCAGCCTTAAAGGGTATTGGTTATGGTATTAAAGGTGGGATTACTTATGGCCTTACTTGTCGTTATTAG	MTTQIINNFNSLNSEDLSTVKGGACSFWGATAAVGVGAVGGAIKGGIQTGTWQGAALKGIGYGIKGGITYGLTCRY*	MTTQIINNFNSLNSEDLSTVKGG	ACSFWGATAAVGVGAVGGAIKGGIQTGTWQGAALKGIGYGIKGGITYGLTCRY*	23	54	0.484906	5133.63	9.74961	3.93583
1001175st1_H3	1939636	1939866	231	GTGGTGACATTTATGTCACTACTTTTTTG	ATGACAACACAAACAATGAACAATTTTGAAACACTCGATCTCGAGACACTTGCAAACGCTGAAGGTGGCGGATGTAGCTGGGGAGGTTTTGCTAAACAAGGAGTAGCTACAGGAGTTGGTAATGGTTTACGATTAGGTATCAAAACACGTACTTGGCAAGGTGCTGTCGCAGGAGCAGCTGGAGGTGCTATCGTAGGGGGTGTTGGTTATGGAGCAACATGCTGGTGGTGA	MTTQTMNNFETLDLETLANAEGGGCSWGGFAKQGVATGVGNGLRLGIKTRTWQGAVAGAAGGAIVGGVGYGATCWW*	MTTQTMNNFETLDLETLANAEGG	GCSWGGFAKQGVATGVGNGLRLGIKTRTWQGAVAGAAGGAIVGGVGYGATCWW*	23	54	0.332075	5136.57	10.2636	3.93758
1001175st1_H3	1939651	1939866	216	GTGGTGACATTTATGTCACTACTTTTTTG	ATGAACAATTTTGAAACACTCGATCTCGAGACACTTGCAAACGCTGAAGGTGGCGGATGTAGCTGGGGAGGTTTTGCTAAACAAGGAGTAGCTACAGGAGTTGGTAATGGTTTACGATTAGGTATCAAAACACGTACTTGGCAAGGTGCTGTCGCAGGAGCAGCTGGAGGTGCTATCGTAGGGGGTGTTGGTTATGGAGCAACATGCTGGTGGTGA	MNNFETLDLETLANAEGGGCSWGGFAKQGVATGVGNGLRLGIKTRTWQGAVAGAAGGAIVGGVGYGATCWW*	MNNFETLDLETLANAEGG	GCSWGGFAKQGVATGVGNGLRLGIKTRTWQGAVAGAAGGAIVGGVGYGATCWW*	18	54	0.332075	5136.57	10.2636	3.93758
1003_SOLI	69605	69835	231	GTAGTGACATTTATGTCACTACTTTTTTG	ATGACGACACAAATCATTAACAATTTTAACTCACTTAATTCCGAAGATCTTTCTACTGTTAAGGGTGGAGCATGTAGTTTTTGGGGAGCTACAGCTGCCGTAGGCGTCGGGGCTGTTGGAGGAGCCATTAAAGGTGGTATTCAAACAGGTACTTGGCAAGGTGCAGCCTTAAAGGGTATTGGTTATGGTATTAAAGATGGGATTACTTATGGACTTATTTGTCGTTATTAG	MTTQIINNFNSLNSEDLSTVKGGACSFWGATAAVGVGAVGGAIKGGIQTGTWQGAALKGIGYGIKDGITYGLICRY*	MTTQIINNFNSLNSEDLSTVKGG	ACSFWGATAAVGVGAVGGAIKGGIQTGTWQGAALKGIGYGIKDGITYGLICRY*	23	54	0.524528	5203.67	9.26645	2.93663
1003_SOLI	78197	78376	180	GTGGTGACATACATGTCACTACTTTTTTG	ATGACAACACAAACAATGAACAATTTTGAAACACTCGATCTCGAGGCACTTGCAAACGTTGAAGGTGGTGGATGGGTTAAGTGTTATGCCGGCACAATCGGATCTGCTCTAGTAGGATCAGCAGGAGGCCCAGTAGGTTACTGGGGAGGAGCTTTAGTTGGTTATGCCACATTCTGCTAA	MTTQTMNNFETLDLEALANVEGGGWVKCYAGTIGSALVGSAGGPVGYWGGALVGYATFC*	MTTQTMNNFETLDLEALANVEGG	GWVKCYAGTIGSALVGSAGGPVGYWGGALVGYATFC*	23	37	0.763889	3494.68	8.2049	0.936154
1003_SOLI	78212	78376	165	GTGGTGACATACATGTCACTACTTTTTTG	ATGAACAATTTTGAAACACTCGATCTCGAGGCACTTGCAAACGTTGAAGGTGGTGGATGGGTTAAGTGTTATGCCGGCACAATCGGATCTGCTCTAGTAGGATCAGCAGGAGGCCCAGTAGGTTACTGGGGAGGAGCTTTAGTTGGTTATGCCACATTCTGCTAA	MNNFETLDLEALANVEGGGWVKCYAGTIGSALVGSAGGPVGYWGGALVGYATFC*	MNNFETLDLEALANVEGG	GWVKCYAGTIGSALVGSAGGPVGYWGGALVGYATFC*	18	37	0.763889	3494.68	8.2049	0.936154
1003_SOLI	539874	540041	168	ATGGTGACATTTATGTCACTACTTTTTTA	ATGACTAAGACCATTAACAATCGTAAAAACATGACTACTCAAGAACTTGAAGCTGTATCAGGTGGAGTAGTTCCTTGGGCCGCTATTTCTGTTGGCATCGCTGCTGCAAAACTGACTTATGACCTTAGCTATGCTGCAGGTAAGTCTTTCTATAACCTCACCCACTAA	MTKTINNRKNMTTQELEAVSGGVVPWAAISVGIAAAKLTYDLSYAAGKSFYNLTH*	MTKTINNRKNMTTQELEAVSGG	VVPWAAISVGIAAAKLTYDLSYAAGKSFYNLTH*	22	34	0.587879	3496.84	9.03496	1.23835
1003_SOLI	539690	539854	165	ATGGTGACATTTATGTCACTACTTTTTTA	ATGACAATGATTAACAAAGAAATGAAGGCAGCTGACCTAGCCTCAGTAACAGGAGGAGGATGGAAGACTAACCTTGCCATTGGAGGGCTCTGCCTAGCTTCAGGACCTATTGGAACGATGGTATGCCTTGGAGCCTACAATGGCTACATGGACTCTGCGCGATAA	MTMINKEMKAADLASVTGGGWKTNLAIGGLCLASGPIGTMVCLGAYNGYMDSAR*	MTMINKEMKAADLASVTGG	GWKTNLAIGGLCLASGPIGTMVCLGAYNGYMDSAR*	19	36	0.417143	3559.71	8.21289	0.937738
1003_SOLI	539696	539854	159	ATGGTGACATTTATGTCACTACTTTTTTA	ATGATTAACAAAGAAATGAAGGCAGCTGACCTAGCCTCAGTAACAGGAGGAGGATGGAAGACTAACCTTGCCATTGGAGGGCTCTGCCTAGCTTCAGGACCTATTGGAACGATGGTATGCCTTGGAGCCTACAATGGCTACATGGACTCTGCGCGATAA	MINKEMKAADLASVTGGGWKTNLAIGGLCLASGPIGTMVCLGAYNGYMDSAR*	MINKEMKAADLASVTGG	GWKTNLAIGGLCLASGPIGTMVCLGAYNGYMDSAR*	17	36	0.417143	3559.71	8.21289	0.937738
1003_SOLI	848852	849052	201	ATAGTGACATTTATGTCACTATTTTTTAT	TTGAAAACATCAGAAATGACACAACAAGTATTGACACATCAGGAATTATCAGTGGTTGTAGGTGGTGGATGTAGTTGGAACAATGCAGCTAAGGCAGCCCTCGGAACAAGTATCACGGGTCTTATCACTAGTGGCCCAGGAGGAGCTTTATTGGGATTAGCTGGAGGAGCAGTAAGTTACGGAGCGTTGTGTTGGGTATGA	LKTSEMTQQVLTHQELSVVVGGGCSWNNAAKAALGTSITGLITSGPGGALLGLAGGAVSYGALCWV*	LKTSEMTQQVLTHQELSVVVGG	GCSWNNAAKAALGTSITGLITSGPGGALLGLAGGAVSYGALCWV*	22	45	0.788636	4105.08	8.22118	0.937741
1003_SOLI	848867	849052	186	ATAGTGACATTTATGTCACTATTTTTTAT	ATGACACAACAAGTATTGACACATCAGGAATTATCAGTGGTTGTAGGTGGTGGATGTAGTTGGAACAATGCAGCTAAGGCAGCCCTCGGAACAAGTATCACGGGTCTTATCACTAGTGGCCCAGGAGGAGCTTTATTGGGATTAGCTGGAGGAGCAGTAAGTTACGGAGCGTTGTGTTGGGTATGA	MTQQVLTHQELSVVVGGGCSWNNAAKAALGTSITGLITSGPGGALLGLAGGAVSYGALCWV*	MTQQVLTHQELSVVVGG	GCSWNNAAKAALGTSITGLITSGPGGALLGLAGGAVSYGALCWV*	17	45	0.788636	4105.08	8.22118	0.937741
1003_SOLI	860224	860373	150	ATAGTGACATTTATGTCACTATTTTTTTG	ATGCGAACGAAGGTATATGGCGAAGAGCTAACTGCTGAAACCTTAGAAAATGTCACAGGAGGTGATTTTGTATCTAGACCTCAAACCTTACCTGAACGATTGGGTTGGAACAGATGGTGGTTGAAAAGAAAACACCCTTATGGTGATTAG	MRTKVYGEELTAETLENVTGGDFVSRPQTLPERLGWNRWWLKRKHPYGD*	MRTKVYGEELTAETLENVTGG	DFVSRPQTLPERLGWNRWWLKRKHPYGD*	21	29	-1.4	3536.83	10.857	3.24197
1270_SSAL	197715	197945	231	GTAGTGACATTTATGTCACTACTTTTTTG	ATGACAACACAAATCATTAACAATTTTAACTCACTTAATTCCGAAGATCTTTCTACTGTTAAGGGTGGAGCATGTAGTTTTTGGGGAGCTACAGCTGCCGTAGGCGTCGGGGCTGTTGGAGGAGCCATTAAAGGTGGTATTCAAACAGGTACTTGGCAAGGTGCAGCCTTAAAGGGTATTGGTTATGGTATTAAAGATGGGATTACTTATGGCCTTATTTGTCGTTATTAG	MTTQIINNFNSLNSEDLSTVKGGACSFWGATAAVGVGAVGGAIKGGIQTGTWQGAALKGIGYGIKDGITYGLICRY*	MTTQIINNFNSLNSEDLSTVKGG	ACSFWGATAAVGVGAVGGAIKGGIQTGTWQGAALKGIGYGIKDGITYGLICRY*	23	54	0.524528	5203.67	9.26645	2.93663
1270_SSAL	206319	206498	180	GTGGTGACATTTATGTCACTACTTTTTTG	ATGACAACACAAACAATGAACACTTTTGAAACACTCGATCTCGAGACACTTGCAAACGTTGAAGGTGGCGGATGGGTTAAGTGTTATGCCGGCACAATTGGCTCTGCTCTAGTAGGATCAGCAGGAGGCCCGGTAGGTTACTGGGGAGGAGCTTTAGTTGGCTATGCTACATTCTGCTAA	MTTQTMNTFETLDLETLANVEGGGWVKCYAGTIGSALVGSAGGPVGYWGGALVGYATFC*	MTTQTMNTFETLDLETLANVEGG	GWVKCYAGTIGSALVGSAGGPVGYWGGALVGYATFC*	23	37	0.763889	3494.68	8.2049	0.936154
1270_SSAL	206334	206498	165	GTGGTGACATTTATGTCACTACTTTTTTG	ATGAACACTTTTGAAACACTCGATCTCGAGACACTTGCAAACGTTGAAGGTGGCGGATGGGTTAAGTGTTATGCCGGCACAATTGGCTCTGCTCTAGTAGGATCAGCAGGAGGCCCGGTAGGTTACTGGGGAGGAGCTTTAGTTGGCTATGCTACATTCTGCTAA	MNTFETLDLETLANVEGGGWVKCYAGTIGSALVGSAGGPVGYWGGALVGYATFC*	MNTFETLDLETLANVEGG	GWVKCYAGTIGSALVGSAGGPVGYWGGALVGYATFC*	18	37	0.763889	3494.68	8.2049	0.936154
1270_SSAL	511619	511768	150	ATAGTGACATTTATGTCACTATTTTTTTG	ATGCGAACTAAGGTATATGGCGAAGAGCTCACTGCTGAAACGTTAGAAAATGTCACAGGGGGTGATTTTGTATCTAGACCTCAAACCTTACCTGAACGATTGGGTTGGAACAAATGGTGGTTGAAAAGAAAATACCCTTATGGTGATTAA	MRTKVYGEELTAETLENVTGGDFVSRPQTLPERLGWNKWWLKRKYPYGD*	MRTKVYGEELTAETLENVTGG	DFVSRPQTLPERLGWNKWWLKRKYPYGD*	21	29	-1.31071	3534.83	10.3219	3.00077
1270_SSAL	541257	541424	168	ATGGTGACATTTATGTCACTACTTTTTTA	ATGACTAAGACCATTAACAATCGTAAAAACATGACTACTCAAGAACTTGAAACTGTATCAGGTGGAGTGGTTCCTTGGGCCGCTATTTCTGTTGGCATTGCTGCTGCAAAACTGACTTATGACCTTAGCTATGCTGCAGGTAAGTCTTTCTATAACCTCACCCACTAA	MTKTINNRKNMTTQELETVSGGVVPWAAISVGIAAAKLTYDLSYAAGKSFYNLTH*	MTKTINNRKNMTTQELETVSGG	VVPWAAISVGIAAAKLTYDLSYAAGKSFYNLTH*	22	34	0.587879	3496.84	9.03496	1.23835
1270_SSAL	541073	541237	165	ATGGTGACATTTATGTCACTACTTTTTTA	ATGACAATGATTAACAAAGAAATGAAGGCAGCTGACCTAGCCTCAGTAACAGGAGGCGGATGGAAGACTAACCTTGCCATTGGAGGGCTCTGCCTAGCTTCAGGACCTATTGGAACTATGGTATGCCTTGGAGCCTACAATGGCTACATGGACTCTGCGAGATAA	MTMINKEMKAADLASVTGGGWKTNLAIGGLCLASGPIGTMVCLGAYNGYMDSAR*	MTMINKEMKAADLASVTGG	GWKTNLAIGGLCLASGPIGTMVCLGAYNGYMDSAR*	19	36	0.417143	3559.71	8.21289	0.937738
1270_SSAL	541079	541237	159	ATGGTGACATTTATGTCACTACTTTTTTA	ATGATTAACAAAGAAATGAAGGCAGCTGACCTAGCCTCAGTAACAGGAGGCGGATGGAAGACTAACCTTGCCATTGGAGGGCTCTGCCTAGCTTCAGGACCTATTGGAACTATGGTATGCCTTGGAGCCTACAATGGCTACATGGACTCTGCGAGATAA	MINKEMKAADLASVTGGGWKTNLAIGGLCLASGPIGTMVCLGAYNGYMDSAR*	MINKEMKAADLASVTGG	GWKTNLAIGGLCLASGPIGTMVCLGAYNGYMDSAR*	17	36	0.417143	3559.71	8.21289	0.937738
140_SSAL	305036	305194	159	GTAGTGACATTTATGTCACTATTTTTTTG	ATGTATATGGATACAATGATGATGGATAAATTTGATTCTTTAACCTTTGATAAGCTTTCTGAAATTGTTGGGGGAAATGTAGCATATGACATTGGTTATGGAGTTGGACAAGTAAGTTATATTGCAGTTGAGATTTTAAAACTTAGAAAAATAAGATAG	MYMDTMMMDKFDSLTFDKLSEIVGGNVAYDIGYGVGQVSYIAVEILKLRKIR*	MYMDTMMMDKFDSLTFDKLSEIVGG	NVAYDIGYGVGQVSYIAVEILKLRKIR*	25	28	0.344444	3036.71	9.73602	1.99935
140_SSAL	305042	305194	153	GTAGTGACATTTATGTCACTATTTTTTTG	ATGGATACAATGATGATGGATAAATTTGATTCTTTAACCTTTGATAAGCTTTCTGAAATTGTTGGGGGAAATGTAGCATATGACATTGGTTATGGAGTTGGACAAGTAAGTTATATTGCAGTTGAGATTTTAAAACTTAGAAAAATAAGATAG	MDTMMMDKFDSLTFDKLSEIVGGNVAYDIGYGVGQVSYIAVEILKLRKIR*	MDTMMMDKFDSLTFDKLSEIVGG	NVAYDIGYGVGQVSYIAVEILKLRKIR*	23	28	0.344444	3036.71	9.73602	1.99935
140_SSAL	304880	305029	150	GTAGTGACATTTATGTCACTATTTTTTTG	ATGAAAAATACATTTCAAAAAATTGATATTAAAGATTTAGCAATTGTAGTTGGTGGAAGTATTTACTCATCTGTAGGATATGGAGTCGGAGTAGTTACTCACACGGTTTATGATTTTGGTCGTGGATTTGTAGATGGATTTAGAGGTTAA	MKNTFQKIDIKDLAIVVGGSIYSSVGYGVGVVTHTVYDFGRGFVDGFRG*	MKNTFQKIDIKDLAIVVGG	SIYSSVGYGVGVVTHTVYDFGRGFVDGFRG*	19	31	0.28	3197.56	7.52846	0.239453
140_SSAL	305051	305194	144	GTAGTGACATTTATGTCACTATTTTTTTG	ATGATGATGGATAAATTTGATTCTTTAACCTTTGATAAGCTTTCTGAAATTGTTGGGGGAAATGTAGCATATGACATTGGTTATGGAGTTGGACAAGTAAGTTATATTGCAGTTGAGATTTTAAAACTTAGAAAAATAAGATAG	MMMDKFDSLTFDKLSEIVGGNVAYDIGYGVGQVSYIAVEILKLRKIR*	MMMDKFDSLTFDKLSEIVGG	NVAYDIGYGVGQVSYIAVEILKLRKIR*	20	28	0.344444	3036.71	9.73602	1.99935
140_SSAL	305054	305194	141	GTAGTGACATTTATGTCACTATTTTTTTG	ATGATGGATAAATTTGATTCTTTAACCTTTGATAAGCTTTCTGAAATTGTTGGGGGAAATGTAGCATATGACATTGGTTATGGAGTTGGACAAGTAAGTTATATTGCAGTTGAGATTTTAAAACTTAGAAAAATAAGATAG	MMDKFDSLTFDKLSEIVGGNVAYDIGYGVGQVSYIAVEILKLRKIR*	MMDKFDSLTFDKLSEIVGG	NVAYDIGYGVGQVSYIAVEILKLRKIR*	19	28	0.344444	3036.71	9.73602	1.99935
140_SSAL	305057	305194	138	GTAGTGACATTTATGTCACTATTTTTTTG	ATGGATAAATTTGATTCTTTAACCTTTGATAAGCTTTCTGAAATTGTTGGGGGAAATGTAGCATATGACATTGGTTATGGAGTTGGACAAGTAAGTTATATTGCAGTTGAGATTTTAAAACTTAGAAAAATAAGATAG	MDKFDSLTFDKLSEIVGGNVAYDIGYGVGQVSYIAVEILKLRKIR*	MDKFDSLTFDKLSEIVGG	NVAYDIGYGVGQVSYIAVEILKLRKIR*	18	28	0.344444	3036.71	9.73602	1.99935
140_SSAL	305036	305194	159	ATAGTGACATTTATGTCACTATTTTTTAT	ATGTATATGGATACAATGATGATGGATAAATTTGATTCTTTAACCTTTGATAAGCTTTCTGAAATTGTTGGGGGAAATGTAGCATATGACATTGGTTATGGAGTTGGACAAGTAAGTTATATTGCAGTTGAGATTTTAAAACTTAGAAAAATAAGATAG	MYMDTMMMDKFDSLTFDKLSEIVGGNVAYDIGYGVGQVSYIAVEILKLRKIR*	MYMDTMMMDKFDSLTFDKLSEIVGG	NVAYDIGYGVGQVSYIAVEILKLRKIR*	25	28	0.344444	3036.71	9.73602	1.99935
140_SSAL	305042	305194	153	ATAGTGACATTTATGTCACTATTTTTTAT	ATGGATACAATGATGATGGATAAATTTGATTCTTTAACCTTTGATAAGCTTTCTGAAATTGTTGGGGGAAATGTAGCATATGACATTGGTTATGGAGTTGGACAAGTAAGTTATATTGCAGTTGAGATTTTAAAACTTAGAAAAATAAGATAG	MDTMMMDKFDSLTFDKLSEIVGGNVAYDIGYGVGQVSYIAVEILKLRKIR*	MDTMMMDKFDSLTFDKLSEIVGG	NVAYDIGYGVGQVSYIAVEILKLRKIR*	23	28	0.344444	3036.71	9.73602	1.99935
140_SSAL	304880	305029	150	ATAGTGACATTTATGTCACTATTTTTTAT	ATGAAAAATACATTTCAAAAAATTGATATTAAAGATTTAGCAATTGTAGTTGGTGGAAGTATTTACTCATCTGTAGGATATGGAGTCGGAGTAGTTACTCACACGGTTTATGATTTTGGTCGTGGATTTGTAGATGGATTTAGAGGTTAA	MKNTFQKIDIKDLAIVVGGSIYSSVGYGVGVVTHTVYDFGRGFVDGFRG*	MKNTFQKIDIKDLAIVVGG	SIYSSVGYGVGVVTHTVYDFGRGFVDGFRG*	19	31	0.28	3197.56	7.52846	0.239453
140_SSAL	305051	305194	144	ATAGTGACATTTATGTCACTATTTTTTAT	ATGATGATGGATAAATTTGATTCTTTAACCTTTGATAAGCTTTCTGAAATTGTTGGGGGAAATGTAGCATATGACATTGGTTATGGAGTTGGACAAGTAAGTTATATTGCAGTTGAGATTTTAAAACTTAGAAAAATAAGATAG	MMMDKFDSLTFDKLSEIVGGNVAYDIGYGVGQVSYIAVEILKLRKIR*	MMMDKFDSLTFDKLSEIVGG	NVAYDIGYGVGQVSYIAVEILKLRKIR*	20	28	0.344444	3036.71	9.73602	1.99935
140_SSAL	305054	305194	141	ATAGTGACATTTATGTCACTATTTTTTAT	ATGATGGATAAATTTGATTCTTTAACCTTTGATAAGCTTTCTGAAATTGTTGGGGGAAATGTAGCATATGACATTGGTTATGGAGTTGGACAAGTAAGTTATATTGCAGTTGAGATTTTAAAACTTAGAAAAATAAGATAG	MMDKFDSLTFDKLSEIVGGNVAYDIGYGVGQVSYIAVEILKLRKIR*	MMDKFDSLTFDKLSEIVGG	NVAYDIGYGVGQVSYIAVEILKLRKIR*	19	28	0.344444	3036.71	9.73602	1.99935
140_SSAL	305057	305194	138	ATAGTGACATTTATGTCACTATTTTTTAT	ATGGATAAATTTGATTCTTTAACCTTTGATAAGCTTTCTGAAATTGTTGGGGGAAATGTAGCATATGACATTGGTTATGGAGTTGGACAAGTAAGTTATATTGCAGTTGAGATTTTAAAACTTAGAAAAATAAGATAG	MDKFDSLTFDKLSEIVGGNVAYDIGYGVGQVSYIAVEILKLRKIR*	MDKFDSLTFDKLSEIVGG	NVAYDIGYGVGQVSYIAVEILKLRKIR*	18	28	0.344444	3036.71	9.73602	1.99935
140_SSAL	1591659	1591889	231	GTGGTGACATAAATGTCACTACTGTTTTG	ATGACAACAAAAATCGTTAACAATTTTAACTCACTTAATTCCGAAGATCTTTCTACTGTTAAGGGGGGAGCATGTAGTTTTTGGGGAGCTACAGCTGCCGTAGGTGTCGGGGCTGTTGGAGGAGCCGTTAAAGGTGGTATTCAAACAGGTACTTGGCAAGGTGCAGCCTTAAAGGGTATTGGTTATGGTATTAAAGGTGGGATTACTTATGGCCTTACTTGTCGTTATTAG	MTTKIVNNFNSLNSEDLSTVKGGACSFWGATAAVGVGAVGGAVKGGIQTGTWQGAALKGIGYGIKGGITYGLTCRY*	MTTKIVNNFNSLNSEDLSTVKGG	ACSFWGATAAVGVGAVGGAVKGGIQTGTWQGAALKGIGYGIKGGITYGLTCRY*	23	54	0.479245	5119.62	9.74961	3.93583
140_SSAL	1600254	1600433	180	GTGGTGACATCCATGTCACTACTTTTTTG	ATGACAACACAAACAATGAACAATTTTGAAACACTCGATCTTGAGGCACTTGCAAACGTTGAAGGTGGTGGATGGGTTAAGTGTTATGCCGGAACAATCGGATCTGCTCTAGTAGGATCAGCAGGAGGCCCAGTAGGTTACTGGGGAGGAGCTTTAGTTGGTTATGCCACATTCTGCTAA	MTTQTMNNFETLDLEALANVEGGGWVKCYAGTIGSALVGSAGGPVGYWGGALVGYATFC*	MTTQTMNNFETLDLEALANVEGG	GWVKCYAGTIGSALVGSAGGPVGYWGGALVGYATFC*	23	37	0.763889	3494.68	8.2049	0.936154
140_SSAL	1600269	1600433	165	GTGGTGACATCCATGTCACTACTTTTTTG	ATGAACAATTTTGAAACACTCGATCTTGAGGCACTTGCAAACGTTGAAGGTGGTGGATGGGTTAAGTGTTATGCCGGAACAATCGGATCTGCTCTAGTAGGATCAGCAGGAGGCCCAGTAGGTTACTGGGGAGGAGCTTTAGTTGGTTATGCCACATTCTGCTAA	MNNFETLDLEALANVEGGGWVKCYAGTIGSALVGSAGGPVGYWGGALVGYATFC*	MNNFETLDLEALANVEGG	GWVKCYAGTIGSALVGSAGGPVGYWGGALVGYATFC*	18	37	0.763889	3494.68	8.2049	0.936154
140_SSAL	124576	124743	168	ATGGTGACATTTATGTCACTACTTTTTTA	ATGACTAAGACCATTAACAATCGTAAAAACATGACTACTCAAGAACTTGAAGCTGTATCAGGTGGAGTGGTTCCTTGGGCCGCTATTTCTGTTGGCATTGCTGCTGCAAAACTGACTTATGACCTTAGCTATGCTGCAGGTAAGTCTTTCTATAACCTCACCCACTAA	MTKTINNRKNMTTQELEAVSGGVVPWAAISVGIAAAKLTYDLSYAAGKSFYNLTH*	MTKTINNRKNMTTQELEAVSGG	VVPWAAISVGIAAAKLTYDLSYAAGKSFYNLTH*	22	34	0.587879	3496.84	9.03496	1.23835
140_SSAL	124392	124556	165	ATGGTGACATTTATGTCACTACTTTTTTA	ATGACAATGATTAATAAAGAAATGAAGGCAGCTGACCTAGCCTCAGTAACAGGAGGCGGATGGAAGACTAACCTTGCCATTGGAGGGCTCTGCCTAGCTTCAGGACCTATTGGAACTATGATGTGCCTTGGAGCCTACAATGGCTACATGGACTCTGCGCGATAA	MTMINKEMKAADLASVTGGGWKTNLAIGGLCLASGPIGTMMCLGAYNGYMDSAR*	MTMINKEMKAADLASVTGG	GWKTNLAIGGLCLASGPIGTMMCLGAYNGYMDSAR*	19	36	0.351429	3591.68	8.21289	0.937738
140_SSAL	124398	124556	159	ATGGTGACATTTATGTCACTACTTTTTTA	ATGATTAATAAAGAAATGAAGGCAGCTGACCTAGCCTCAGTAACAGGAGGCGGATGGAAGACTAACCTTGCCATTGGAGGGCTCTGCCTAGCTTCAGGACCTATTGGAACTATGATGTGCCTTGGAGCCTACAATGGCTACATGGACTCTGCGCGATAA	MINKEMKAADLASVTGGGWKTNLAIGGLCLASGPIGTMMCLGAYNGYMDSAR*	MINKEMKAADLASVTGG	GWKTNLAIGGLCLASGPIGTMMCLGAYNGYMDSAR*	17	36	0.351429	3591.68	8.21289	0.937738
140_SSAL	2126848	2127042	195	ATGGTGACATTTATGTCACTATTTTTTGT	ATGGTATTGAATTTAGAAAATGTAAACTGTGTTACTCTTCAAGATGAAGAATTGATGATGGTTAACGGAGGTCTTGCACCGATTGTAATTGGTGGAGTTGTCGTAGGTTGGAAGGTCATTGGTGGCGTTGCAGGTGTTATAGCAGCAAGTGGTGCTGCAGGGATTGCAGCAGGTTATTATGCTAATCGTCCTTAA	MVLNLENVNCVTLQDEELMMVNGGLAPIVIGGVVVGWKVIGGVAGVIAASGAAGIAAGYYANRP*	MVLNLENVNCVTLQDEELMMVNGG	LAPIVIGGVVVGWKVIGGVAGVIAASGAAGIAAGYYANRP*	24	41	1.2225	3734.1	10.0086	1.99825
140_SSAL	2126854	2127042	189	ATGGTGACATTTATGTCACTATTTTTTGT	TTGAATTTAGAAAATGTAAACTGTGTTACTCTTCAAGATGAAGAATTGATGATGGTTAACGGAGGTCTTGCACCGATTGTAATTGGTGGAGTTGTCGTAGGTTGGAAGGTCATTGGTGGCGTTGCAGGTGTTATAGCAGCAAGTGGTGCTGCAGGGATTGCAGCAGGTTATTATGCTAATCGTCCTTAA	LNLENVNCVTLQDEELMMVNGGLAPIVIGGVVVGWKVIGGVAGVIAASGAAGIAAGYYANRP*	LNLENVNCVTLQDEELMMVNGG	LAPIVIGGVVVGWKVIGGVAGVIAASGAAGIAAGYYANRP*	22	41	1.2225	3734.1	10.0086	1.99825
140_SSAL	2127262	2127417	156	ATGGTGACATTTATGTCACTATTTTTTGT	ATGTCTAAAAAATATGAGTTGAGTAAAAAAGAATTACAGGAAATTCAAGGAGGTGTTGCACCAATTATGGTTGCTATTGGTTTAGGAAGTCTAGCAGTAGCATCATTTAGTTCAGGATATAAATTTGGAACAGATTTAGCTAGACGTGGACGATAG	MSKKYELSKKELQEIQGGVAPIMVAIGLGSLAVASFSSGYKFGTDLARRGR*	MSKKYELSKKELQEIQGG	VAPIMVAIGLGSLAVASFSSGYKFGTDLARRGR*	18	34	0.6	3366.82	11.4308	2.99983
20-12 S2	2129885	2130034	150	ATAGTGACATTTATGTCACTATTTTTTTG	ATGCGAACTAAGGCATATGGCGAAGAGCTGACTGCTGAAACCTTAGAAAATGTCACAGGGGGTGATTTTGTATCTAGACCTCAAACCTTACCTGAACGATTGGGTTGGAACAAATGGTGGTTGAAAAGAAGACCTCCTTATGGCGATTAG	MRTKAYGEELTAETLENVTGGDFVSRPQTLPERLGWNKWWLKRRPPYGD*	MRTKAYGEELTAETLENVTGG	DFVSRPQTLPERLGWNKWWLKRRPPYGD*	21	29	-1.34286	3496.83	10.8569	3.00172
20-12 S2	794225	794392	168	ATGGTGACATTTATGTCACTACTTTTTTA	ATGACTAAGACCATTAACAATCGTAAAAACATGACTACTCAAGAACTTGAAGCTGTATCAGGTGGAGTAGTTCCTTGGGCCGCTATTTCTGTTGGCATCGCTGCTGCAAAACTGACTTATGACCTTAGCTATGCTGCAGGTAAGTCTTTCTATAACCTCACCCACTAA	MTKTINNRKNMTTQELEAVSGGVVPWAAISVGIAAAKLTYDLSYAAGKSFYNLTH*	MTKTINNRKNMTTQELEAVSGG	VVPWAAISVGIAAAKLTYDLSYAAGKSFYNLTH*	22	34	0.587879	3496.84	9.03496	1.23835
20-12 S2	794041	794205	165	ATGGTGACATTTATGTCACTACTTTTTTA	ATGACAATGATTAACAAAGAAATGAAGGCAGCTGACCTAGCCTCAGTAACAGGAGGAGGATGGAAGACTAACCTTGCCATTGGAGGGCTCTGCCTAGCTTCAGGACCTATTGGAACGATGGTATGCCTTGGAGCCTACAATGGCTACATGGACTCTGCGCGATAA	MTMINKEMKAADLASVTGGGWKTNLAIGGLCLASGPIGTMVCLGAYNGYMDSAR*	MTMINKEMKAADLASVTGG	GWKTNLAIGGLCLASGPIGTMVCLGAYNGYMDSAR*	19	36	0.417143	3559.71	8.21289	0.937738
20-12 S2	794047	794205	159	ATGGTGACATTTATGTCACTACTTTTTTA	ATGATTAACAAAGAAATGAAGGCAGCTGACCTAGCCTCAGTAACAGGAGGAGGATGGAAGACTAACCTTGCCATTGGAGGGCTCTGCCTAGCTTCAGGACCTATTGGAACGATGGTATGCCTTGGAGCCTACAATGGCTACATGGACTCTGCGCGATAA	MINKEMKAADLASVTGGGWKTNLAIGGLCLASGPIGTMVCLGAYNGYMDSAR*	MINKEMKAADLASVTGG	GWKTNLAIGGLCLASGPIGTMVCLGAYNGYMDSAR*	17	36	0.417143	3559.71	8.21289	0.937738
20-12 S2	1966204	1966437	234	GTGGTGACATACATGTCACTACTTTTTTG	ATGACAACACAAACAATGAACAATTTTGAAACACTCGATCTCGAGGCACTTGCAAACGTTGAAGGTGGAAATAGATGTAAAGATTTAATCTTTGGAGGAGCTTTAACTGGCGCAGGTGCTGGATTTACAGGTGGTATGGCAGCATTTGGTGTTACAGCATTTCCAGGAGCATTTGTAGGAGCACATGTTGGAGCAGTTGCTGGTGGGCTAGCATGTATCGGAGCGAGCTTTTAG	MTTQTMNNFETLDLEALANVEGGNRCKDLIFGGALTGAGAGFTGGMAAFGVTAFPGAFVGAHVGAVAGGLACIGASF*	MTTQTMNNFETLDLEALANVEGG	NRCKDLIFGGALTGAGAGFTGGMAAFGVTAFPGAFVGAHVGAVAGGLACIGASF*	23	55	0.996296	4987.47	8.24126	1.17958
20-12 S2	1966219	1966437	219	GTGGTGACATACATGTCACTACTTTTTTG	ATGAACAATTTTGAAACACTCGATCTCGAGGCACTTGCAAACGTTGAAGGTGGAAATAGATGTAAAGATTTAATCTTTGGAGGAGCTTTAACTGGCGCAGGTGCTGGATTTACAGGTGGTATGGCAGCATTTGGTGTTACAGCATTTCCAGGAGCATTTGTAGGAGCACATGTTGGAGCAGTTGCTGGTGGGCTAGCATGTATCGGAGCGAGCTTTTAG	MNNFETLDLEALANVEGGNRCKDLIFGGALTGAGAGFTGGMAAFGVTAFPGAFVGAHVGAVAGGLACIGASF*	MNNFETLDLEALANVEGG	NRCKDLIFGGALTGAGAGFTGGMAAFGVTAFPGAFVGAHVGAVAGGLACIGASF*	18	55	0.996296	4987.47	8.24126	1.17958
20-12 S2	1966450	1966638	189	GTGGTGACATACATGTCACTACTTTTTTG	ATGAATGTGACTAAGTATAATAAGATGTGCGATGCTGAGCTAGAAATTATTTCTGGTGGTGGGAAAGTTGGAGCAGTAATTGGTGGCTGTCTAGGTGGTATGCTCATGGCATGGGCAGCAGGACCTGTTTCCGCAGGGGGTTATACTATGATATGTGCTACTTCGGGGCTTGCAAATGCTTATTTTTGA	MNVTKYNKMCDAELEIISGGGKVGAVIGGCLGGMLMAWAAGPVSAGGYTMICATSGLANAYF*	MNVTKYNKMCDAELEIISGG	GKVGAVIGGCLGGMLMAWAAGPVSAGGYTMICATSGLANAYF*	20	43	0.985714	3992.91	8.21291	0.936947
20-12 S2	1966456	1966638	183	GTGGTGACATACATGTCACTACTTTTTTG	GTGACTAAGTATAATAAGATGTGCGATGCTGAGCTAGAAATTATTTCTGGTGGTGGGAAAGTTGGAGCAGTAATTGGTGGCTGTCTAGGTGGTATGCTCATGGCATGGGCAGCAGGACCTGTTTCCGCAGGGGGTTATACTATGATATGTGCTACTTCGGGGCTTGCAAATGCTTATTTTTGA	VTKYNKMCDAELEIISGGGKVGAVIGGCLGGMLMAWAAGPVSAGGYTMICATSGLANAYF*	VTKYNKMCDAELEIISGG	GKVGAVIGGCLGGMLMAWAAGPVSAGGYTMICATSGLANAYF*	18	43	0.985714	3992.91	8.21291	0.936947
22-08 S7	673786	673944	159	ATAGTGACATTTATGTCACTATTTTTTTG	ATGTATATGGATACAATGATGATGGATAAATTTGATTCTTTAACCTTTGATAAGCTTTCTGAAATTGTTGGGGGAAATGTAGCATATGACATTGGTTATGGAGTTGGACAAGTAAGTTATATTGCAGTTGAGATTTTAAAACTGAGAAAAATAAGATAG	MYMDTMMMDKFDSLTFDKLSEIVGGNVAYDIGYGVGQVSYIAVEILKLRKIR*	MYMDTMMMDKFDSLTFDKLSEIVGG	NVAYDIGYGVGQVSYIAVEILKLRKIR*	25	28	0.344444	3036.71	9.73602	1.99935
22-08 S7	673792	673944	153	ATAGTGACATTTATGTCACTATTTTTTTG	ATGGATACAATGATGATGGATAAATTTGATTCTTTAACCTTTGATAAGCTTTCTGAAATTGTTGGGGGAAATGTAGCATATGACATTGGTTATGGAGTTGGACAAGTAAGTTATATTGCAGTTGAGATTTTAAAACTGAGAAAAATAAGATAG	MDTMMMDKFDSLTFDKLSEIVGGNVAYDIGYGVGQVSYIAVEILKLRKIR*	MDTMMMDKFDSLTFDKLSEIVGG	NVAYDIGYGVGQVSYIAVEILKLRKIR*	23	28	0.344444	3036.71	9.73602	1.99935
22-08 S7	673630	673779	150	ATAGTGACATTTATGTCACTATTTTTTTG	ATGAAAAATACATTTCAAAAAATTGATATTAAAGATTTAGCAATTGTAGTTGGTGGAAGTATTTACTCATCTGTAGGATATGGAGTCGGAGTAGTTACTCACACGGTTTATGATTTTGGTCGTGGATTTGTAGATGGATTTAGAGGTTAA	MKNTFQKIDIKDLAIVVGGSIYSSVGYGVGVVTHTVYDFGRGFVDGFRG*	MKNTFQKIDIKDLAIVVGG	SIYSSVGYGVGVVTHTVYDFGRGFVDGFRG*	19	31	0.28	3197.56	7.52846	0.239453
22-08 S7	672868	673017	150	ATAGTGACATTTATGTCACTATTTTTTTG	ATGCGAACTAAGGCATATGGCGAAGAGCTCACTGCTGAAACGTTAGAAAATGTCACAGGGGGTGATTTTGTATCTAGACCTCAAACCTTACCTGAACGATTGGGTTGGAACAAATGGTGGTTGAAAAGAAGACCTCCTTATGGCGATTAG	MRTKAYGEELTAETLENVTGGDFVSRPQTLPERLGWNKWWLKRRPPYGD*	MRTKAYGEELTAETLENVTGG	DFVSRPQTLPERLGWNKWWLKRRPPYGD*	21	29	-1.34286	3496.83	10.8569	3.00172
22-08 S7	673801	673944	144	ATAGTGACATTTATGTCACTATTTTTTTG	ATGATGATGGATAAATTTGATTCTTTAACCTTTGATAAGCTTTCTGAAATTGTTGGGGGAAATGTAGCATATGACATTGGTTATGGAGTTGGACAAGTAAGTTATATTGCAGTTGAGATTTTAAAACTGAGAAAAATAAGATAG	MMMDKFDSLTFDKLSEIVGGNVAYDIGYGVGQVSYIAVEILKLRKIR*	MMMDKFDSLTFDKLSEIVGG	NVAYDIGYGVGQVSYIAVEILKLRKIR*	20	28	0.344444	3036.71	9.73602	1.99935
22-08 S7	673804	673944	141	ATAGTGACATTTATGTCACTATTTTTTTG	ATGATGGATAAATTTGATTCTTTAACCTTTGATAAGCTTTCTGAAATTGTTGGGGGAAATGTAGCATATGACATTGGTTATGGAGTTGGACAAGTAAGTTATATTGCAGTTGAGATTTTAAAACTGAGAAAAATAAGATAG	MMDKFDSLTFDKLSEIVGGNVAYDIGYGVGQVSYIAVEILKLRKIR*	MMDKFDSLTFDKLSEIVGG	NVAYDIGYGVGQVSYIAVEILKLRKIR*	19	28	0.344444	3036.71	9.73602	1.99935
22-08 S7	673807	673944	138	ATAGTGACATTTATGTCACTATTTTTTTG	ATGGATAAATTTGATTCTTTAACCTTTGATAAGCTTTCTGAAATTGTTGGGGGAAATGTAGCATATGACATTGGTTATGGAGTTGGACAAGTAAGTTATATTGCAGTTGAGATTTTAAAACTGAGAAAAATAAGATAG	MDKFDSLTFDKLSEIVGGNVAYDIGYGVGQVSYIAVEILKLRKIR*	MDKFDSLTFDKLSEIVGG	NVAYDIGYGVGQVSYIAVEILKLRKIR*	18	28	0.344444	3036.71	9.73602	1.99935
22-08 S7	673786	673944	159	ATGGTGACATTTATGTCACTATTTTTTAT	ATGTATATGGATACAATGATGATGGATAAATTTGATTCTTTAACCTTTGATAAGCTTTCTGAAATTGTTGGGGGAAATGTAGCATATGACATTGGTTATGGAGTTGGACAAGTAAGTTATATTGCAGTTGAGATTTTAAAACTGAGAAAAATAAGATAG	MYMDTMMMDKFDSLTFDKLSEIVGGNVAYDIGYGVGQVSYIAVEILKLRKIR*	MYMDTMMMDKFDSLTFDKLSEIVGG	NVAYDIGYGVGQVSYIAVEILKLRKIR*	25	28	0.344444	3036.71	9.73602	1.99935
22-08 S7	673792	673944	153	ATGGTGACATTTATGTCACTATTTTTTAT	ATGGATACAATGATGATGGATAAATTTGATTCTTTAACCTTTGATAAGCTTTCTGAAATTGTTGGGGGAAATGTAGCATATGACATTGGTTATGGAGTTGGACAAGTAAGTTATATTGCAGTTGAGATTTTAAAACTGAGAAAAATAAGATAG	MDTMMMDKFDSLTFDKLSEIVGGNVAYDIGYGVGQVSYIAVEILKLRKIR*	MDTMMMDKFDSLTFDKLSEIVGG	NVAYDIGYGVGQVSYIAVEILKLRKIR*	23	28	0.344444	3036.71	9.73602	1.99935
22-08 S7	673630	673779	150	ATGGTGACATTTATGTCACTATTTTTTAT	ATGAAAAATACATTTCAAAAAATTGATATTAAAGATTTAGCAATTGTAGTTGGTGGAAGTATTTACTCATCTGTAGGATATGGAGTCGGAGTAGTTACTCACACGGTTTATGATTTTGGTCGTGGATTTGTAGATGGATTTAGAGGTTAA	MKNTFQKIDIKDLAIVVGGSIYSSVGYGVGVVTHTVYDFGRGFVDGFRG*	MKNTFQKIDIKDLAIVVGG	SIYSSVGYGVGVVTHTVYDFGRGFVDGFRG*	19	31	0.28	3197.56	7.52846	0.239453
22-08 S7	673801	673944	144	ATGGTGACATTTATGTCACTATTTTTTAT	ATGATGATGGATAAATTTGATTCTTTAACCTTTGATAAGCTTTCTGAAATTGTTGGGGGAAATGTAGCATATGACATTGGTTATGGAGTTGGACAAGTAAGTTATATTGCAGTTGAGATTTTAAAACTGAGAAAAATAAGATAG	MMMDKFDSLTFDKLSEIVGGNVAYDIGYGVGQVSYIAVEILKLRKIR*	MMMDKFDSLTFDKLSEIVGG	NVAYDIGYGVGQVSYIAVEILKLRKIR*	20	28	0.344444	3036.71	9.73602	1.99935
22-08 S7	673804	673944	141	ATGGTGACATTTATGTCACTATTTTTTAT	ATGATGGATAAATTTGATTCTTTAACCTTTGATAAGCTTTCTGAAATTGTTGGGGGAAATGTAGCATATGACATTGGTTATGGAGTTGGACAAGTAAGTTATATTGCAGTTGAGATTTTAAAACTGAGAAAAATAAGATAG	MMDKFDSLTFDKLSEIVGGNVAYDIGYGVGQVSYIAVEILKLRKIR*	MMDKFDSLTFDKLSEIVGG	NVAYDIGYGVGQVSYIAVEILKLRKIR*	19	28	0.344444	3036.71	9.73602	1.99935
22-08 S7	673807	673944	138	ATGGTGACATTTATGTCACTATTTTTTAT	ATGGATAAATTTGATTCTTTAACCTTTGATAAGCTTTCTGAAATTGTTGGGGGAAATGTAGCATATGACATTGGTTATGGAGTTGGACAAGTAAGTTATATTGCAGTTGAGATTTTAAAACTGAGAAAAATAAGATAG	MDKFDSLTFDKLSEIVGGNVAYDIGYGVGQVSYIAVEILKLRKIR*	MDKFDSLTFDKLSEIVGG	NVAYDIGYGVGQVSYIAVEILKLRKIR*	18	28	0.344444	3036.71	9.73602	1.99935
22-08 S7	1432035	1432265	231	GTAGTGACATTTATGTCACTACTTTTTTG	ATGACGACACAAATCATTAACAATTTTAACTCACTTAATTCCGAAGATCTTTCTACTGTTAAGGGTGGAGCATGTAGTTTTTGGGGAGCTACAGCTGCCGTAGGCGTCGGGGCTGTTGGAGGAGCCATTAAAGGTGGTATTCAAACAGGTACTTGGCAAGGTGCAGCCTTAAAGGGTATTGGTTATGGTATTAAAGATGGGATTACTTATGGACTTATTTGTCGTTATTAG	MTTQIINNFNSLNSEDLSTVKGGACSFWGATAAVGVGAVGGAIKGGIQTGTWQGAALKGIGYGIKDGITYGLICRY*	MTTQIINNFNSLNSEDLSTVKGG	ACSFWGATAAVGVGAVGGAIKGGIQTGTWQGAALKGIGYGIKDGITYGLICRY*	23	54	0.524528	5203.67	9.26645	2.93663
22-08 S7	1440650	1440829	180	GTAGTGACATTTATGTCACTACTTTTTTG	ATGACAACACAAACAATGAACAATTTTGAAACACTCGATCTCGAGGCACTTGCAAACGTTGAAGGTGGCGGATGGGTTAAGTGTTATGCCGGCACAATCGGATCTGCTCTAGTAGGATCAGCTGGAGGCCCAGTAGGTTACTGGGGAGGAGCTTTAGTTGGTTATGCCACATTCTGCTAA	MTTQTMNNFETLDLEALANVEGGGWVKCYAGTIGSALVGSAGGPVGYWGGALVGYATFC*	MTTQTMNNFETLDLEALANVEGG	GWVKCYAGTIGSALVGSAGGPVGYWGGALVGYATFC*	23	37	0.763889	3494.68	8.2049	0.936154
22-08 S7	1440665	1440829	165	GTAGTGACATTTATGTCACTACTTTTTTG	ATGAACAATTTTGAAACACTCGATCTCGAGGCACTTGCAAACGTTGAAGGTGGCGGATGGGTTAAGTGTTATGCCGGCACAATCGGATCTGCTCTAGTAGGATCAGCTGGAGGCCCAGTAGGTTACTGGGGAGGAGCTTTAGTTGGTTATGCCACATTCTGCTAA	MNNFETLDLEALANVEGGGWVKCYAGTIGSALVGSAGGPVGYWGGALVGYATFC*	MNNFETLDLEALANVEGG	GWVKCYAGTIGSALVGSAGGPVGYWGGALVGYATFC*	18	37	0.763889	3494.68	8.2049	0.936154
22-08 S7	2330167	2330334	168	ATGGTGACATTTATGTCACTACTTTTTTA	ATGACTAAGACCATTAACAATCGTAAAAACATGACTACTCAAGAACTTGAAGCTGTATCAGGTGGAGTGGTTCCTTGGGCCGCTATTTCTGTTGGCATTGCTGCTGCAAAACTGACTTATGACCTTAGCTATGCTGCAGGTAAGTCTTTCTATAACCTCACCCACTAA	MTKTINNRKNMTTQELEAVSGGVVPWAAISVGIAAAKLTYDLSYAAGKSFYNLTH*	MTKTINNRKNMTTQELEAVSGG	VVPWAAISVGIAAAKLTYDLSYAAGKSFYNLTH*	22	34	0.587879	3496.84	9.03496	1.23835
22-08 S7	2329983	2330147	165	ATGGTGACATTTATGTCACTACTTTTTTA	ATGACAATGATTAATAAAGAAATGAAGGCAGCTGACCTAGCCTCAGTAACAGGAGGCGGATGGAAGACTAACCTTGCCATTGGAGGGCTCTGCCTAGCTTCAGGACCTATTGGAACTATGATGTGCCTTGGAGCCTACAATGGCTACATGGACTCTGCGCGATAA	MTMINKEMKAADLASVTGGGWKTNLAIGGLCLASGPIGTMMCLGAYNGYMDSAR*	MTMINKEMKAADLASVTGG	GWKTNLAIGGLCLASGPIGTMMCLGAYNGYMDSAR*	19	36	0.351429	3591.68	8.21289	0.937738
22-08 S7	2329989	2330147	159	ATGGTGACATTTATGTCACTACTTTTTTA	ATGATTAATAAAGAAATGAAGGCAGCTGACCTAGCCTCAGTAACAGGAGGCGGATGGAAGACTAACCTTGCCATTGGAGGGCTCTGCCTAGCTTCAGGACCTATTGGAACTATGATGTGCCTTGGAGCCTACAATGGCTACATGGACTCTGCGCGATAA	MINKEMKAADLASVTGGGWKTNLAIGGLCLASGPIGTMMCLGAYNGYMDSAR*	MINKEMKAADLASVTGG	GWKTNLAIGGLCLASGPIGTMMCLGAYNGYMDSAR*	17	36	0.351429	3591.68	8.21289	0.937738
34-09 S8	526753	526989	237	GTAGTGACATAAATGTCACTACTTTTTTG	ATGACAACACAAATCATTAACAATTTTAATTCACTTAATTCCGAAGATCTTTCTATTATCGAAGGTGGTGGTGTGATTGGTTGTGTAGCTGGGACCGCTGGATCTGCTGGACTTGGATTTTTGACTGGAACATCAGTTGGAACTGTTACATTTCCAATTGTTGGGACTGTTTCAGGTGGAGCATTTGGGGCATGGTCAGGAGCCGGCCTTGGAATGGCTACATTTTGCGGAGTTTAG	MTTQIINNFNSLNSEDLSIIEGGGVIGCVAGTAGSAGLGFLTGTSVGTVTFPIVGTVSGGAFGAWSGAGLGMATFCGV*	MTTQIINNFNSLNSEDLSIIEGG	GVIGCVAGTAGSAGLGFLTGTSVGTVTFPIVGTVSGGAFGAWSGAGLGMATFCGV*	23	56	1.15455	4950.44	5.826	-0.0613069
34-09 S8	535365	535592	228	GTGGTGACATTTATGTCACTACTTTTTTG	ATGACAACACAAACAATTAACACTTTTGAAACGCTCGATTTCGAGGCACTTGCAAACGTTGAAGGTGGAAAAGTCAATTGGGACCGCTTATCTAGTAGCGCTAGTGGTGCTGCTGAAGGGATTTACTTCTGTGCCGCATCAGGTGCCCCACTCTTTACGCTTGCACCTTATGCTATTGTAGGGTGTGGAGTTGTCGGAGCTGGTCTTGGTTATGCTTTCCCACATTAA	MTTQTINTFETLDFEALANVEGGKVNWDRLSSSASGAAEGIYFCAASGAPLFTLAPYAIVGCGVVGAGLGYAFPH*	MTTQTINTFETLDFEALANVEGG	KVNWDRLSSSASGAAEGIYFCAASGAPLFTLAPYAIVGCGVVGAGLGYAFPH*	23	53	0.630769	5188.56	7.24779	0.178455
34-09 S8	1453130	1453297	168	ATGGTGACATTTATGTCACTACTTTTTTA	ATGACTAAGACCATTAACAATCGTAAAAACATGACTACTCAAGAACTTGAAGCTGTATCAGGTGGAGTGGTTCCTTGGGCCGCTATTTCTGTTGGCATTGCTGCTGCAAAACTGACTTATGACCTTAGCTATGCTGCAGGTAAGTCTTTCTATAACCTCACCCACTAA	MTKTINNRKNMTTQELEAVSGGVVPWAAISVGIAAAKLTYDLSYAAGKSFYNLTH*	MTKTINNRKNMTTQELEAVSGG	VVPWAAISVGIAAAKLTYDLSYAAGKSFYNLTH*	22	34	0.587879	3496.84	9.03496	1.23835
34-09 S8	1452946	1453110	165	ATGGTGACATTTATGTCACTACTTTTTTA	ATGACAATGATTAATAAAGAAATGAAGGCAGCTGACCTAGCCTCAGTAACAGGAGGCGGATGGAAGACTAACCTTGCCATTGGAGGGCTCTGCCTAGCTTCAGGACCTATTGGAACTATGATGTGCCTTGGAGCCTACAATGGCTACATGGACTCTGCGCGATAA	MTMINKEMKAADLASVTGGGWKTNLAIGGLCLASGPIGTMMCLGAYNGYMDSAR*	MTMINKEMKAADLASVTGG	GWKTNLAIGGLCLASGPIGTMMCLGAYNGYMDSAR*	19	36	0.351429	3591.68	8.21289	0.937738
34-09 S8	1452952	1453110	159	ATGGTGACATTTATGTCACTACTTTTTTA	ATGATTAATAAAGAAATGAAGGCAGCTGACCTAGCCTCAGTAACAGGAGGCGGATGGAAGACTAACCTTGCCATTGGAGGGCTCTGCCTAGCTTCAGGACCTATTGGAACTATGATGTGCCTTGGAGCCTACAATGGCTACATGGACTCTGCGCGATAA	MINKEMKAADLASVTGGGWKTNLAIGGLCLASGPIGTMMCLGAYNGYMDSAR*	MINKEMKAADLASVTGG	GWKTNLAIGGLCLASGPIGTMMCLGAYNGYMDSAR*	17	36	0.351429	3591.68	8.21289	0.937738
34-09 S8	1258911	1259051	141	TTAGTGACATCTATGTCACTATTTTTTTC	TTGTCTATCCCAGTAGCTATGGGTGTCCTCCACCTCTTTGGAGGTCCCCTTCTTGACCCAATGATAGCAGGACTTGCCATGAGCTTTAGCTCTGTTTCGGTCGTCCTTAATGCTCTGCGCCTCAAACGTCGCAAAGTCTAA	LSIPVAMGVLHLFGGPLLDPMIAGLAMSFSSVSVVLNALRLKRRKV*	LSIPVAMGVLHLFGG	PLLDPMIAGLAMSFSSVSVVLNALRLKRRKV*	15	32	0.677419	3380.95	12.2437	4.00047
34-09 S8	1881176	1881325	150	GTAGTGACATTTATGTCACTATTTTTTTG	ATGCGAACTAAGGTATATGGTGAAGAGCTCAATGCTGAAATCTTAGAAAATGTTACAGGGGGTGGTTTTGTATCTAAACCTCAAACCTTACCTGAACGATTGGGTTGGAACAAATGGTGGTTGAAAAGAAGACCTCCTTATGGGGATTAG	MRTKVYGEELNAEILENVTGGGFVSKPQTLPERLGWNKWWLKRRPPYGD*	MRTKVYGEELNAEILENVTGG	GFVSKPQTLPERLGWNKWWLKRRPPYGD*	21	29	-1.21071	3410.82	11.0904	4.00077
34-19 S9	979647	979814	168	ATGGTGACATTTATGTCACTACTTTTTTA	ATGACTAAGACCATTAACAATCGTAAAAACATGACTACTCAAGAACTTGAAGCTGTATCAGGTGGAGTGGTTCCTTGGGCCGCTATTTCTGTTGGCATTGCTGCTGCAAAACTGACTTATGACCTTAGCTATGCTGCAGGTAAGTCTTTCTATAACCTCACCCACTAA	MTKTINNRKNMTTQELEAVSGGVVPWAAISVGIAAAKLTYDLSYAAGKSFYNLTH*	MTKTINNRKNMTTQELEAVSGG	VVPWAAISVGIAAAKLTYDLSYAAGKSFYNLTH*	22	34	0.587879	3496.84	9.03496	1.23835
34-19 S9	979463	979627	165	ATGGTGACATTTATGTCACTACTTTTTTA	ATGACAATGATTAATAAAGAAATGAAGGCAGCTGACCTAGCCTCAGTAACAGGAGGCGGATGGAAGACTAACCTTGCCATTGGAGGGCTCTGCCTAGCTTCAGGACCTATTGGAACTATGATGTGCCTTGGAGCCTACAATGGCTACATGGACTCTGCGCGATAA	MTMINKEMKAADLASVTGGGWKTNLAIGGLCLASGPIGTMMCLGAYNGYMDSAR*	MTMINKEMKAADLASVTGG	GWKTNLAIGGLCLASGPIGTMMCLGAYNGYMDSAR*	19	36	0.351429	3591.68	8.21289	0.937738
34-19 S9	979469	979627	159	ATGGTGACATTTATGTCACTACTTTTTTA	ATGATTAATAAAGAAATGAAGGCAGCTGACCTAGCCTCAGTAACAGGAGGCGGATGGAAGACTAACCTTGCCATTGGAGGGCTCTGCCTAGCTTCAGGACCTATTGGAACTATGATGTGCCTTGGAGCCTACAATGGCTACATGGACTCTGCGCGATAA	MINKEMKAADLASVTGGGWKTNLAIGGLCLASGPIGTMMCLGAYNGYMDSAR*	MINKEMKAADLASVTGG	GWKTNLAIGGLCLASGPIGTMMCLGAYNGYMDSAR*	17	36	0.351429	3591.68	8.21289	0.937738
34-19 S9	1169017	1169166	150	GTAGTGACATTTATGTCACTATTTTTTTG	ATGCGAACTAAGGTATATGGTGAAGAGCTCAATGCTGAAATCTTAGAAAATGTTACAGGGGGTGGTTTTGTATCTAAACCTCAAACCTTACCTGAACGATTGGGTTGGAACAAATGGTGGTTGAAAAGAAGACCTCCTTATGGGGATTAG	MRTKVYGEELNAEILENVTGGGFVSKPQTLPERLGWNKWWLKRRPPYGD*	MRTKVYGEELNAEILENVTGG	GFVSKPQTLPERLGWNKWWLKRRPPYGD*	21	29	-1.21071	3410.82	11.0904	4.00077
34-19 S9	833798	834025	228	GTGGTGACATTTATGTCACTACTTTTTTG	ATGACAACACAAACAATTAACACTTTTGAAACGCTCGATTTCGAGGCACTTGCAAACGTTGAAGGTGGAAAAGTCAATTGGGACCGCTTATCTAGTAGCGCTAGTGGTGCTGCTGAAGGGATTTACTTCTGTGCCGCATCAGGTGCCCCACTCTTTACGCTTGCACCTTATGCTATTGTAGGGTGTGGAGTTGTCGGAGCTGGTCTTGGTTATGCTTTCCCACATTAA	MTTQTINTFETLDFEALANVEGGKVNWDRLSSSASGAAEGIYFCAASGAPLFTLAPYAIVGCGVVGAGLGYAFPH*	MTTQTINTFETLDFEALANVEGG	KVNWDRLSSSASGAAEGIYFCAASGAPLFTLAPYAIVGCGVVGAGLGYAFPH*	23	53	0.630769	5188.56	7.24779	0.178455
34-19 S9	2002135	2002371	237	GTAGTGACATAAATGTCACTACTTTTTTG	ATGACAACACAAATCATTAACAATTTTAATTCACTTAATTCCGAAGATCTTTCTATTATCGAAGGTGGTGGTGTGATTGGTTGTGTAGCTGGGACCGCTGGATCTGCTGGACTTGGATTTTTGACTGGAACATCAGTTGGAACTGTTACATTTCCAATTGTTGGGACTGTTTCAGGTGGAGCATTTGGGGCATGGTCAGGAGCCGGCCTTGGAATGGCTACATTTTGCGGAGTTTAG	MTTQIINNFNSLNSEDLSIIEGGGVIGCVAGTAGSAGLGFLTGTSVGTVTFPIVGTVSGGAFGAWSGAGLGMATFCGV*	MTTQIINNFNSLNSEDLSIIEGG	GVIGCVAGTAGSAGLGFLTGTSVGTVTFPIVGTVSGGAFGAWSGAGLGMATFCGV*	23	56	1.15455	4950.44	5.826	-0.0613069
34-19 S9	3638426	3638566	141	TTAGTGACATCTATGTCACTATTTTTTTC	TTGTCTATCCCAGTAGCTATGGGTGTCCTCCACCTCTTTGGAGGTCCCCTTCTTGACCCAATGATAGCAGGACTTGCCATGAGCTTTAGCTCTGTTTCGGTCGTCCTTAATGCTCTGCGCCTCAAACGTCGCAAAGTCTAA	LSIPVAMGVLHLFGGPLLDPMIAGLAMSFSSVSVVLNALRLKRRKV*	LSIPVAMGVLHLFGG	PLLDPMIAGLAMSFSSVSVVLNALRLKRRKV*	15	32	0.677419	3380.95	12.2437	4.00047
34-24 S10	1270302	1270442	141	TTAGTGACATCTATGTCACTATTTTTTTC	TTGTCTATCCCAGTAGCTATGGGTGTCCTCCACCTCTTTGGAGGTCCCCTTCTTGACCCAATGATAGCAGGACTTGCCATGAGCTTTAGCTCTGTTTCGGTCGTCCTTAATGCTCTGCGCCTCAAACGTCGCAAAGTCTAA	LSIPVAMGVLHLFGGPLLDPMIAGLAMSFSSVSVVLNALRLKRRKV*	LSIPVAMGVLHLFGG	PLLDPMIAGLAMSFSSVSVVLNALRLKRRKV*	15	32	0.677419	3380.95	12.2437	4.00047
34-24 S10	1580531	1580698	168	ATGGTGACATTTATGTCACTACTTTTTTA	ATGACTAAGACCATTAACAATCGTAAAAACATGACTACTCAAGAACTTGAAGCTGTATCAGGTGGAGTGGTTCCTTGGGCCGCTATTTCTGTTGGCATTGCTGCTGCAAAACTGACTTATGACCTTAGCTATGCTGCAGGTAAGTCTTTCTATAACCTCACCCACTAA	MTKTINNRKNMTTQELEAVSGGVVPWAAISVGIAAAKLTYDLSYAAGKSFYNLTH*	MTKTINNRKNMTTQELEAVSGG	VVPWAAISVGIAAAKLTYDLSYAAGKSFYNLTH*	22	34	0.587879	3496.84	9.03496	1.23835
34-24 S10	1580347	1580511	165	ATGGTGACATTTATGTCACTACTTTTTTA	ATGACAATGATTAATAAAGAAATGAAGGCAGCTGACCTAGCCTCAGTAACAGGAGGCGGATGGAAGACTAACCTTGCCATTGGAGGGCTCTGCCTAGCTTCAGGACCTATTGGAACTATGATGTGCCTTGGAGCCTACAATGGCTACATGGACTCTGCGCGATAA	MTMINKEMKAADLASVTGGGWKTNLAIGGLCLASGPIGTMMCLGAYNGYMDSAR*	MTMINKEMKAADLASVTGG	GWKTNLAIGGLCLASGPIGTMMCLGAYNGYMDSAR*	19	36	0.351429	3591.68	8.21289	0.937738
34-24 S10	1580353	1580511	159	ATGGTGACATTTATGTCACTACTTTTTTA	ATGATTAATAAAGAAATGAAGGCAGCTGACCTAGCCTCAGTAACAGGAGGCGGATGGAAGACTAACCTTGCCATTGGAGGGCTCTGCCTAGCTTCAGGACCTATTGGAACTATGATGTGCCTTGGAGCCTACAATGGCTACATGGACTCTGCGCGATAA	MINKEMKAADLASVTGGGWKTNLAIGGLCLASGPIGTMMCLGAYNGYMDSAR*	MINKEMKAADLASVTGG	GWKTNLAIGGLCLASGPIGTMMCLGAYNGYMDSAR*	17	36	0.351429	3591.68	8.21289	0.937738
34-24 S10	1649109	1649258	150	GTAGTGACATTTATGTCACTATTTTTTTG	ATGCGAACTAAGGTATATGGTGAAGAGCTCAATGCTGAAATCTTAGAAAATGTTACAGGGGGTGGTTTTGTATCTAAACCTCAAACCTTACCTGAACGATTGGGTTGGAACAAATGGTGGTTGAAAAGAAGACCTCCTTATGGGGATTAG	MRTKVYGEELNAEILENVTGGGFVSKPQTLPERLGWNKWWLKRRPPYGD*	MRTKVYGEELNAEILENVTGG	GFVSKPQTLPERLGWNKWWLKRRPPYGD*	21	29	-1.21071	3410.82	11.0904	4.00077
34-24 S10	833171	833407	237	GTAGTGACATAAATGTCACTACTTTTTTG	ATGACAACACAAATCATTAACAATTTTAATTCACTTAATTCCGAAGATCTTTCTATTATCGAAGGTGGTGGTGTGATTGGTTGTGTAGCTGGGACCGCTGGATCTGCTGGACTTGGATTTTTGACTGGAACATCAGTTGGAACTGTTACATTTCCAATTGTTGGGACTGTTTCAGGTGGAGCATTTGGGGCATGGTCAGGAGCCGGCCTTGGAATGGCTACATTTTGCGGAGTTTAG	MTTQIINNFNSLNSEDLSIIEGGGVIGCVAGTAGSAGLGFLTGTSVGTVTFPIVGTVSGGAFGAWSGAGLGMATFCGV*	MTTQIINNFNSLNSEDLSIIEGG	GVIGCVAGTAGSAGLGFLTGTSVGTVTFPIVGTVSGGAFGAWSGAGLGMATFCGV*	23	56	1.15455	4950.44	5.826	-0.0613069
34-24 S10	841783	842010	228	GTGGTGACATTTATGTCACTACTTTTTTG	ATGACAACACAAACAATTAACACTTTTGAAACGCTCGATTTCGAGGCACTTGCAAACGTTGAAGGTGGAAAAGTCAATTGGGACCGCTTATCTAGTAGCGCTAGTGGTGCTGCTGAAGGGATTTACTTCTGTGCCGCATCAGGTGCCCCACTCTTTACGCTTGCACCTTATGCTATTGTAGGGTGTGGAGTTGTCGGAGCTGGTCTTGGTTATGCTTTCCCACATTAA	MTTQTINTFETLDFEALANVEGGKVNWDRLSSSASGAAEGIYFCAASGAPLFTLAPYAIVGCGVVGAGLGYAFPH*	MTTQTINTFETLDFEALANVEGG	KVNWDRLSSSASGAAEGIYFCAASGAPLFTLAPYAIVGCGVVGAGLGYAFPH*	23	53	0.630769	5188.56	7.24779	0.178455
37-08 S12	1092489	1092719	231	GTAGTGACATTTATGTCACTACTTTTTTG	ATGACAACACAAATCATTAACAATTTTAACTCACTTAATTCCGAAGATCTTTCTACTGTTAAGGGTGGAGCATGTAGTTTTTGGGGAGCTACAGCTGCCGTAGGCGTCGGGGCTGTTGGAGGAGCCATTAAAGGTGGTATTCAAACAGGTACTTGGCAAGGTGCAGCCTTAAAGGGTATTGGTTATGGTATTAAAGATGGGATTACTTATGGCCTTATTTGTCGTTATTAG	MTTQIINNFNSLNSEDLSTVKGGACSFWGATAAVGVGAVGGAIKGGIQTGTWQGAALKGIGYGIKDGITYGLICRY*	MTTQIINNFNSLNSEDLSTVKGG	ACSFWGATAAVGVGAVGGAIKGGIQTGTWQGAALKGIGYGIKDGITYGLICRY*	23	54	0.524528	5203.67	9.26645	2.93663
37-08 S12	1101102	1101332	231	GTGGTGACATTTATGTCACTACTTTTTTG	ATGACAACACAAACAATGAACACTTTTGAAACACTCGATCTCGAGACACTTGCAAACGTTGAAGGTGGCGGATGTAGCTGGGGAGGTTTTGCTAAACAAGGAGTAGCTACAGGAGTTGGTAATGGTTTACGATTAGGTATCAAAACACGTACTTGGCAAGGTGCTGTCGCAGGAGCAGCCGGAGGTGCTATCGTAGGTGGTGTTGGTTATGGAGCAACATGCTGGTGGTGA	MTTQTMNTFETLDLETLANVEGGGCSWGGFAKQGVATGVGNGLRLGIKTRTWQGAVAGAAGGAIVGGVGYGATCWW*	MTTQTMNTFETLDLETLANVEGG	GCSWGGFAKQGVATGVGNGLRLGIKTRTWQGAVAGAAGGAIVGGVGYGATCWW*	23	54	0.332075	5136.57	10.2636	3.93758
37-08 S12	1101117	1101332	216	GTGGTGACATTTATGTCACTACTTTTTTG	ATGAACACTTTTGAAACACTCGATCTCGAGACACTTGCAAACGTTGAAGGTGGCGGATGTAGCTGGGGAGGTTTTGCTAAACAAGGAGTAGCTACAGGAGTTGGTAATGGTTTACGATTAGGTATCAAAACACGTACTTGGCAAGGTGCTGTCGCAGGAGCAGCCGGAGGTGCTATCGTAGGTGGTGTTGGTTATGGAGCAACATGCTGGTGGTGA	MNTFETLDLETLANVEGGGCSWGGFAKQGVATGVGNGLRLGIKTRTWQGAVAGAAGGAIVGGVGYGATCWW*	MNTFETLDLETLANVEGG	GCSWGGFAKQGVATGVGNGLRLGIKTRTWQGAVAGAAGGAIVGGVGYGATCWW*	18	54	0.332075	5136.57	10.2636	3.93758
37-08 S12	1770656	1770823	168	ATGGTGACATTTATGTCACTACTTTTTTA	ATGACTAAGACCATTAACAATCGTAAAAACATGACTACTCAAGAACTTGAAGCTGTATCAGGTGGAGTAGTTCCTTGGGCCGCTATTTCTGTTGGCATCGCTGCTGCAAAACTGACTTATGACCTTAGCTATGCCGCAGGTAAATCTTTCTATAACCTCACCCACTAA	MTKTINNRKNMTTQELEAVSGGVVPWAAISVGIAAAKLTYDLSYAAGKSFYNLTH*	MTKTINNRKNMTTQELEAVSGG	VVPWAAISVGIAAAKLTYDLSYAAGKSFYNLTH*	22	34	0.587879	3496.84	9.03496	1.23835
37-08 S12	1770472	1770636	165	ATGGTGACATTTATGTCACTACTTTTTTA	ATGACAATGATTAACAAAGAAATGAAGGCAGCTGAGCTAGCCTCAGTAACAGGAGGCGGATGGAAGACCAACATCGCCATTGGAGGGCTCTGCCTAGCTTCAGGACCTATTGGAACTATGGTATGCCTTGGAGCCTACAATGGCTATATGGACTCTGCACGATAA	MTMINKEMKAAELASVTGGGWKTNIAIGGLCLASGPIGTMVCLGAYNGYMDSAR*	MTMINKEMKAAELASVTGG	GWKTNIAIGGLCLASGPIGTMVCLGAYNGYMDSAR*	19	36	0.437143	3559.71	8.21289	0.937738
37-08 S12	1770478	1770636	159	ATGGTGACATTTATGTCACTACTTTTTTA	ATGATTAACAAAGAAATGAAGGCAGCTGAGCTAGCCTCAGTAACAGGAGGCGGATGGAAGACCAACATCGCCATTGGAGGGCTCTGCCTAGCTTCAGGACCTATTGGAACTATGGTATGCCTTGGAGCCTACAATGGCTATATGGACTCTGCACGATAA	MINKEMKAAELASVTGGGWKTNIAIGGLCLASGPIGTMVCLGAYNGYMDSAR*	MINKEMKAAELASVTGG	GWKTNIAIGGLCLASGPIGTMVCLGAYNGYMDSAR*	17	36	0.437143	3559.71	8.21289	0.937738
37-08 S12	2234066	2234215	150	ATAGTGACATTTATGTCACTATTTTTTTG	ATGCGAACTAAGGTATATGGCGAAGAGCTCACTGCTGAAACGTTAGAAAATGTCACAGGGGGTGATTTTGTATCTAGACCTCAAACCTTACCTGAACGATTGGGTTGGAACAAATGGTGGTTGAAAAGAAAATACCCTTATGGTGATTAA	MRTKVYGEELTAETLENVTGGDFVSRPQTLPERLGWNKWWLKRKYPYGD*	MRTKVYGEELTAETLENVTGG	DFVSRPQTLPERLGWNKWWLKRKYPYGD*	21	29	-1.31071	3534.83	10.3219	3.00077
37-09 S13	350111	350269	159	GTAGTGACATTTATGTCACTATTTTTTTG	ATGTATATGGATACAATGATGATGGATAAATTTGATTCTTTAACCTTTGATAAGCTTTCTGAAATTGTTGGGGGAAATGTAGCATATGACATTGGTTATGGAGTTGGACAAGTAAGTTATATTGCAGTTGAGATTTTAAAACTGAGAAAAATAAGATAG	MYMDTMMMDKFDSLTFDKLSEIVGGNVAYDIGYGVGQVSYIAVEILKLRKIR*	MYMDTMMMDKFDSLTFDKLSEIVGG	NVAYDIGYGVGQVSYIAVEILKLRKIR*	25	28	0.344444	3036.71	9.73602	1.99935
37-09 S13	350117	350269	153	GTAGTGACATTTATGTCACTATTTTTTTG	ATGGATACAATGATGATGGATAAATTTGATTCTTTAACCTTTGATAAGCTTTCTGAAATTGTTGGGGGAAATGTAGCATATGACATTGGTTATGGAGTTGGACAAGTAAGTTATATTGCAGTTGAGATTTTAAAACTGAGAAAAATAAGATAG	MDTMMMDKFDSLTFDKLSEIVGGNVAYDIGYGVGQVSYIAVEILKLRKIR*	MDTMMMDKFDSLTFDKLSEIVGG	NVAYDIGYGVGQVSYIAVEILKLRKIR*	23	28	0.344444	3036.71	9.73602	1.99935
37-09 S13	349955	350104	150	GTAGTGACATTTATGTCACTATTTTTTTG	ATGAAAAATACATTTCAAAAAATTGATATTAAAGATTTAGCAATTGTAGTTGGTGGAAGTATTTACTCATCTGTAGGATATGGAGTCGGAGTAGTCACTCACACGGTTTATGATTTTGGTCGTGGATTTGTAGATGGATTTAGAGGTTAA	MKNTFQKIDIKDLAIVVGGSIYSSVGYGVGVVTHTVYDFGRGFVDGFRG*	MKNTFQKIDIKDLAIVVGG	SIYSSVGYGVGVVTHTVYDFGRGFVDGFRG*	19	31	0.28	3197.56	7.52846	0.239453
37-09 S13	349193	349342	150	GTAGTGACATTTATGTCACTATTTTTTTG	ATGCGAACTAAGGCATATGGTGAAGAGCTCAATGCTGAAATCTTAGAAAATGTTACAGGGGGTGGTTTTGTATCTAAACCTCAAACCTTACCTGAGCGATTGGGTTGGAACAAATGGTGGTTGAAAAGAAGACCTCCTTATGGCGATTAG	MRTKAYGEELNAEILENVTGGGFVSKPQTLPERLGWNKWWLKRRPPYGD*	MRTKAYGEELNAEILENVTGG	GFVSKPQTLPERLGWNKWWLKRRPPYGD*	21	29	-1.21071	3410.82	11.0904	4.00077
37-09 S13	350126	350269	144	GTAGTGACATTTATGTCACTATTTTTTTG	ATGATGATGGATAAATTTGATTCTTTAACCTTTGATAAGCTTTCTGAAATTGTTGGGGGAAATGTAGCATATGACATTGGTTATGGAGTTGGACAAGTAAGTTATATTGCAGTTGAGATTTTAAAACTGAGAAAAATAAGATAG	MMMDKFDSLTFDKLSEIVGGNVAYDIGYGVGQVSYIAVEILKLRKIR*	MMMDKFDSLTFDKLSEIVGG	NVAYDIGYGVGQVSYIAVEILKLRKIR*	20	28	0.344444	3036.71	9.73602	1.99935
37-09 S13	350129	350269	141	GTAGTGACATTTATGTCACTATTTTTTTG	ATGATGGATAAATTTGATTCTTTAACCTTTGATAAGCTTTCTGAAATTGTTGGGGGAAATGTAGCATATGACATTGGTTATGGAGTTGGACAAGTAAGTTATATTGCAGTTGAGATTTTAAAACTGAGAAAAATAAGATAG	MMDKFDSLTFDKLSEIVGGNVAYDIGYGVGQVSYIAVEILKLRKIR*	MMDKFDSLTFDKLSEIVGG	NVAYDIGYGVGQVSYIAVEILKLRKIR*	19	28	0.344444	3036.71	9.73602	1.99935
37-09 S13	350132	350269	138	GTAGTGACATTTATGTCACTATTTTTTTG	ATGGATAAATTTGATTCTTTAACCTTTGATAAGCTTTCTGAAATTGTTGGGGGAAATGTAGCATATGACATTGGTTATGGAGTTGGACAAGTAAGTTATATTGCAGTTGAGATTTTAAAACTGAGAAAAATAAGATAG	MDKFDSLTFDKLSEIVGGNVAYDIGYGVGQVSYIAVEILKLRKIR*	MDKFDSLTFDKLSEIVGG	NVAYDIGYGVGQVSYIAVEILKLRKIR*	18	28	0.344444	3036.71	9.73602	1.99935
37-09 S13	350111	350269	159	ATAGTGACATTTATGTCACTATTTTTTAT	ATGTATATGGATACAATGATGATGGATAAATTTGATTCTTTAACCTTTGATAAGCTTTCTGAAATTGTTGGGGGAAATGTAGCATATGACATTGGTTATGGAGTTGGACAAGTAAGTTATATTGCAGTTGAGATTTTAAAACTGAGAAAAATAAGATAG	MYMDTMMMDKFDSLTFDKLSEIVGGNVAYDIGYGVGQVSYIAVEILKLRKIR*	MYMDTMMMDKFDSLTFDKLSEIVGG	NVAYDIGYGVGQVSYIAVEILKLRKIR*	25	28	0.344444	3036.71	9.73602	1.99935
37-09 S13	350117	350269	153	ATAGTGACATTTATGTCACTATTTTTTAT	ATGGATACAATGATGATGGATAAATTTGATTCTTTAACCTTTGATAAGCTTTCTGAAATTGTTGGGGGAAATGTAGCATATGACATTGGTTATGGAGTTGGACAAGTAAGTTATATTGCAGTTGAGATTTTAAAACTGAGAAAAATAAGATAG	MDTMMMDKFDSLTFDKLSEIVGGNVAYDIGYGVGQVSYIAVEILKLRKIR*	MDTMMMDKFDSLTFDKLSEIVGG	NVAYDIGYGVGQVSYIAVEILKLRKIR*	23	28	0.344444	3036.71	9.73602	1.99935
37-09 S13	349955	350104	150	ATAGTGACATTTATGTCACTATTTTTTAT	ATGAAAAATACATTTCAAAAAATTGATATTAAAGATTTAGCAATTGTAGTTGGTGGAAGTATTTACTCATCTGTAGGATATGGAGTCGGAGTAGTCACTCACACGGTTTATGATTTTGGTCGTGGATTTGTAGATGGATTTAGAGGTTAA	MKNTFQKIDIKDLAIVVGGSIYSSVGYGVGVVTHTVYDFGRGFVDGFRG*	MKNTFQKIDIKDLAIVVGG	SIYSSVGYGVGVVTHTVYDFGRGFVDGFRG*	19	31	0.28	3197.56	7.52846	0.239453
37-09 S13	350126	350269	144	ATAGTGACATTTATGTCACTATTTTTTAT	ATGATGATGGATAAATTTGATTCTTTAACCTTTGATAAGCTTTCTGAAATTGTTGGGGGAAATGTAGCATATGACATTGGTTATGGAGTTGGACAAGTAAGTTATATTGCAGTTGAGATTTTAAAACTGAGAAAAATAAGATAG	MMMDKFDSLTFDKLSEIVGGNVAYDIGYGVGQVSYIAVEILKLRKIR*	MMMDKFDSLTFDKLSEIVGG	NVAYDIGYGVGQVSYIAVEILKLRKIR*	20	28	0.344444	3036.71	9.73602	1.99935
37-09 S13	350129	350269	141	ATAGTGACATTTATGTCACTATTTTTTAT	ATGATGGATAAATTTGATTCTTTAACCTTTGATAAGCTTTCTGAAATTGTTGGGGGAAATGTAGCATATGACATTGGTTATGGAGTTGGACAAGTAAGTTATATTGCAGTTGAGATTTTAAAACTGAGAAAAATAAGATAG	MMDKFDSLTFDKLSEIVGGNVAYDIGYGVGQVSYIAVEILKLRKIR*	MMDKFDSLTFDKLSEIVGG	NVAYDIGYGVGQVSYIAVEILKLRKIR*	19	28	0.344444	3036.71	9.73602	1.99935
37-09 S13	350132	350269	138	ATAGTGACATTTATGTCACTATTTTTTAT	ATGGATAAATTTGATTCTTTAACCTTTGATAAGCTTTCTGAAATTGTTGGGGGAAATGTAGCATATGACATTGGTTATGGAGTTGGACAAGTAAGTTATATTGCAGTTGAGATTTTAAAACTGAGAAAAATAAGATAG	MDKFDSLTFDKLSEIVGGNVAYDIGYGVGQVSYIAVEILKLRKIR*	MDKFDSLTFDKLSEIVGG	NVAYDIGYGVGQVSYIAVEILKLRKIR*	18	28	0.344444	3036.71	9.73602	1.99935
37-09 S13	526979	527209	231	GTAGTGACATTTATGTCACTACTTTTTTG	ATGACAACACAAATCATTAACAATTTTAACTCACTTAATTCCGAAGATCTTTCTACTGTTAAGGGTGGAGCATGTAGTTTTTGGGGAGCTACAGCTGCCGTAGGCGTCGGGGCTGTTGGAGGAGCCATTAAAGGTGGTATTCAAACAGGTACTTGGCAAGGTGCAGCCTTAAAGGGTATTGGTTATGGTATTAAAGATGGGATTACTTATGGCCTTATTTGTCGTTATTAG	MTTQIINNFNSLNSEDLSTVKGGACSFWGATAAVGVGAVGGAIKGGIQTGTWQGAALKGIGYGIKDGITYGLICRY*	MTTQIINNFNSLNSEDLSTVKGG	ACSFWGATAAVGVGAVGGAIKGGIQTGTWQGAALKGIGYGIKDGITYGLICRY*	23	54	0.524528	5203.67	9.26645	2.93663
37-09 S13	535595	535774	180	GTGGTGACATTTATGTCACTACTTTTTTG	ATGACAACACAAACAATGAACAATTTTGAAACACTCGATCTCGAGACACTTGCAAACGTTGAAGGTGGTGGATGGGTTAAGTGTTATGCCGGCACAATTGGATCTGCTCTAGTAGGATCAGCAGGAGGCCCAGTAGGTTACTGGGGAGGAGCTTTAGTTGGTTACGCCACATTCTGCTAA	MTTQTMNNFETLDLETLANVEGGGWVKCYAGTIGSALVGSAGGPVGYWGGALVGYATFC*	MTTQTMNNFETLDLETLANVEGG	GWVKCYAGTIGSALVGSAGGPVGYWGGALVGYATFC*	23	37	0.763889	3494.68	8.2049	0.936154
37-09 S13	535610	535774	165	GTGGTGACATTTATGTCACTACTTTTTTG	ATGAACAATTTTGAAACACTCGATCTCGAGACACTTGCAAACGTTGAAGGTGGTGGATGGGTTAAGTGTTATGCCGGCACAATTGGATCTGCTCTAGTAGGATCAGCAGGAGGCCCAGTAGGTTACTGGGGAGGAGCTTTAGTTGGTTACGCCACATTCTGCTAA	MNNFETLDLETLANVEGGGWVKCYAGTIGSALVGSAGGPVGYWGGALVGYATFC*	MNNFETLDLETLANVEGG	GWVKCYAGTIGSALVGSAGGPVGYWGGALVGYATFC*	18	37	0.763889	3494.68	8.2049	0.936154
37-09 S13	1694467	1694634	168	ATGGTGACATTTATGTCACTACTTTTTTA	ATGACTAAGACCATTAACAATCGTAAAAACATGACTACTCAAGAACTTGAAGCTGTATCAGGTGGAGTGGTTCCTTGGGCCGCTATTTCTGTTGGCATTGCTGCTGCAAAACTGACTTATGACCTTAGCTATGCTGCAGGTAAGTCTTTCTATAACCTCACCCACTAA	MTKTINNRKNMTTQELEAVSGGVVPWAAISVGIAAAKLTYDLSYAAGKSFYNLTH*	MTKTINNRKNMTTQELEAVSGG	VVPWAAISVGIAAAKLTYDLSYAAGKSFYNLTH*	22	34	0.587879	3496.84	9.03496	1.23835
37-09 S13	1694283	1694447	165	ATGGTGACATTTATGTCACTACTTTTTTA	ATGACAATGATTAATAAAGAAATGAAGGCAGCTGACCTAGCCTCAGTAACAGGAGGCGGATGGAAGACTAACCTTGCCATTGGAGGGCTCTGCCTAGCTTCAGGACCTATTGGAACTATGATGTGCCTTGGAGCCTACAATGGCTACGTGGACTCTGCGCGATAA	MTMINKEMKAADLASVTGGGWKTNLAIGGLCLASGPIGTMMCLGAYNGYVDSAR*	MTMINKEMKAADLASVTGG	GWKTNLAIGGLCLASGPIGTMMCLGAYNGYVDSAR*	19	36	0.417143	3559.71	8.21289	0.937738
37-09 S13	1694289	1694447	159	ATGGTGACATTTATGTCACTACTTTTTTA	ATGATTAATAAAGAAATGAAGGCAGCTGACCTAGCCTCAGTAACAGGAGGCGGATGGAAGACTAACCTTGCCATTGGAGGGCTCTGCCTAGCTTCAGGACCTATTGGAACTATGATGTGCCTTGGAGCCTACAATGGCTACGTGGACTCTGCGCGATAA	MINKEMKAADLASVTGGGWKTNLAIGGLCLASGPIGTMMCLGAYNGYVDSAR*	MINKEMKAADLASVTGG	GWKTNLAIGGLCLASGPIGTMMCLGAYNGYVDSAR*	17	36	0.417143	3559.71	8.21289	0.937738
39-01 S14	120918	121085	168	ATGGTGACATTTATGTCACTACTTTTTTA	ATGACTAAGACCATTAACAATCGTAAAAACATGACTACTCAAGAACTTGAAGCTGTATCAGGTGGAGTGGTTCCTTGGGCCGCTATTTCTGTTGGCATTGCTGCTGCAAAACTGACTTATGACCTTAGCTATGCTGCAGGTAAGTCTTTCTATAACCTCACCCACTAA	MTKTINNRKNMTTQELEAVSGGVVPWAAISVGIAAAKLTYDLSYAAGKSFYNLTH*	MTKTINNRKNMTTQELEAVSGG	VVPWAAISVGIAAAKLTYDLSYAAGKSFYNLTH*	22	34	0.587879	3496.84	9.03496	1.23835
39-01 S14	120734	120898	165	ATGGTGACATTTATGTCACTACTTTTTTA	ATGACAGTGATTAACAAAGAAATGAAGGCAGCTGACCTAGCCTCAGTAACAGGAGGCGGATGGAAGACTAACCTTGCCATTGGAGGGCTCTGCCTAGCTTCAGGACCTATTGGAACTATGGTATGCCTTGGAGCCTACAATGGCTACATGGACTCTGCGCGATAA	MTVINKEMKAADLASVTGGGWKTNLAIGGLCLASGPIGTMVCLGAYNGYMDSAR*	MTVINKEMKAADLASVTGG	GWKTNLAIGGLCLASGPIGTMVCLGAYNGYMDSAR*	19	36	0.417143	3559.71	8.21289	0.937738
39-01 S14	120740	120898	159	ATGGTGACATTTATGTCACTACTTTTTTA	GTGATTAACAAAGAAATGAAGGCAGCTGACCTAGCCTCAGTAACAGGAGGCGGATGGAAGACTAACCTTGCCATTGGAGGGCTCTGCCTAGCTTCAGGACCTATTGGAACTATGGTATGCCTTGGAGCCTACAATGGCTACATGGACTCTGCGCGATAA	VINKEMKAADLASVTGGGWKTNLAIGGLCLASGPIGTMVCLGAYNGYMDSAR*	VINKEMKAADLASVTGG	GWKTNLAIGGLCLASGPIGTMVCLGAYNGYMDSAR*	17	36	0.417143	3559.71	8.21289	0.937738
39-01 S14	1273911	1274090	180	GTGGTGACATTTATGTCACTACTTTTTTG	ATGACAACACAAACAATTAACACTTTTGAAACACTCGATCTTGAGGCACTTGCAAACGTTGAAGGTGGCGGATGGGTTAAGTGTTATGCCGGCACAATTGGCTCTGCTCTAGTAGGATCAGCAGGAGGCCCGGTAGGTTACTGGGGAGGAGCTTTAGTTGGTTACGCCACATTCTGCTAA	MTTQTINTFETLDLEALANVEGGGWVKCYAGTIGSALVGSAGGPVGYWGGALVGYATFC*	MTTQTINTFETLDLEALANVEGG	GWVKCYAGTIGSALVGSAGGPVGYWGGALVGYATFC*	23	37	0.763889	3494.68	8.2049	0.936154
39-01 S14	1594849	1595007	159	ATAGTGACATCTATGTCACTATTTTTTTG	ATGTATATGGATACAATGATGATGGATAAATTTGATTCTTTAACCTTTGATAAGCTTTCTGAAATTGTTGGGGGAAATGTAGCATATGACATTGGTTATGGAGTTGGACAAGTAAGTTATATTGCAGTTGAGATTTTAAAACTGAGAAAAATAAGATAG	MYMDTMMMDKFDSLTFDKLSEIVGGNVAYDIGYGVGQVSYIAVEILKLRKIR*	MYMDTMMMDKFDSLTFDKLSEIVGG	NVAYDIGYGVGQVSYIAVEILKLRKIR*	25	28	0.344444	3036.71	9.73602	1.99935
39-01 S14	1594855	1595007	153	ATAGTGACATCTATGTCACTATTTTTTTG	ATGGATACAATGATGATGGATAAATTTGATTCTTTAACCTTTGATAAGCTTTCTGAAATTGTTGGGGGAAATGTAGCATATGACATTGGTTATGGAGTTGGACAAGTAAGTTATATTGCAGTTGAGATTTTAAAACTGAGAAAAATAAGATAG	MDTMMMDKFDSLTFDKLSEIVGGNVAYDIGYGVGQVSYIAVEILKLRKIR*	MDTMMMDKFDSLTFDKLSEIVGG	NVAYDIGYGVGQVSYIAVEILKLRKIR*	23	28	0.344444	3036.71	9.73602	1.99935
39-01 S14	1593930	1594079	150	ATAGTGACATCTATGTCACTATTTTTTTG	ATGCGAACTAAGGCATATGGCGAAGAGCTCACTGCTGAAACCTTAGAAAATGTCACAGGGGGTGATTTTGTATCTAGACCTCAAACCTTACCTGAACGATTGGGTTGGAATAGATGGTGGTTGAAAAGAAAATACCCTTATGGTGATTAG	MRTKAYGEELTAETLENVTGGDFVSRPQTLPERLGWNRWWLKRKYPYGD*	MRTKAYGEELTAETLENVTGG	DFVSRPQTLPERLGWNRWWLKRKYPYGD*	21	29	-1.33214	3562.84	10.4397	3.00093
39-01 S14	1594693	1594842	150	ATAGTGACATCTATGTCACTATTTTTTTG	ATGAAAAATACATTTCAAAAAATTGATATTAAAGATTTAGCAATTGTAGTTGGTGGAAGTATTTACTCATCTGTAGGATATGGAGTCGGAGTAGTTACTCACACGGTTTATGATTTTGGTCGTGGATTTGTAGATGGATTTAGAGGTTAA	MKNTFQKIDIKDLAIVVGGSIYSSVGYGVGVVTHTVYDFGRGFVDGFRG*	MKNTFQKIDIKDLAIVVGG	SIYSSVGYGVGVVTHTVYDFGRGFVDGFRG*	19	31	0.28	3197.56	7.52846	0.239453
39-01 S14	1594864	1595007	144	ATAGTGACATCTATGTCACTATTTTTTTG	ATGATGATGGATAAATTTGATTCTTTAACCTTTGATAAGCTTTCTGAAATTGTTGGGGGAAATGTAGCATATGACATTGGTTATGGAGTTGGACAAGTAAGTTATATTGCAGTTGAGATTTTAAAACTGAGAAAAATAAGATAG	MMMDKFDSLTFDKLSEIVGGNVAYDIGYGVGQVSYIAVEILKLRKIR*	MMMDKFDSLTFDKLSEIVGG	NVAYDIGYGVGQVSYIAVEILKLRKIR*	20	28	0.344444	3036.71	9.73602	1.99935
39-01 S14	1594867	1595007	141	ATAGTGACATCTATGTCACTATTTTTTTG	ATGATGGATAAATTTGATTCTTTAACCTTTGATAAGCTTTCTGAAATTGTTGGGGGAAATGTAGCATATGACATTGGTTATGGAGTTGGACAAGTAAGTTATATTGCAGTTGAGATTTTAAAACTGAGAAAAATAAGATAG	MMDKFDSLTFDKLSEIVGGNVAYDIGYGVGQVSYIAVEILKLRKIR*	MMDKFDSLTFDKLSEIVGG	NVAYDIGYGVGQVSYIAVEILKLRKIR*	19	28	0.344444	3036.71	9.73602	1.99935
39-01 S14	1594870	1595007	138	ATAGTGACATCTATGTCACTATTTTTTTG	ATGGATAAATTTGATTCTTTAACCTTTGATAAGCTTTCTGAAATTGTTGGGGGAAATGTAGCATATGACATTGGTTATGGAGTTGGACAAGTAAGTTATATTGCAGTTGAGATTTTAAAACTGAGAAAAATAAGATAG	MDKFDSLTFDKLSEIVGGNVAYDIGYGVGQVSYIAVEILKLRKIR*	MDKFDSLTFDKLSEIVGG	NVAYDIGYGVGQVSYIAVEILKLRKIR*	18	28	0.344444	3036.71	9.73602	1.99935
39-01 S14	1594849	1595007	159	ATGGTGACATTTATGTCACTATTTTTTAT	ATGTATATGGATACAATGATGATGGATAAATTTGATTCTTTAACCTTTGATAAGCTTTCTGAAATTGTTGGGGGAAATGTAGCATATGACATTGGTTATGGAGTTGGACAAGTAAGTTATATTGCAGTTGAGATTTTAAAACTGAGAAAAATAAGATAG	MYMDTMMMDKFDSLTFDKLSEIVGGNVAYDIGYGVGQVSYIAVEILKLRKIR*	MYMDTMMMDKFDSLTFDKLSEIVGG	NVAYDIGYGVGQVSYIAVEILKLRKIR*	25	28	0.344444	3036.71	9.73602	1.99935
39-01 S14	1594855	1595007	153	ATGGTGACATTTATGTCACTATTTTTTAT	ATGGATACAATGATGATGGATAAATTTGATTCTTTAACCTTTGATAAGCTTTCTGAAATTGTTGGGGGAAATGTAGCATATGACATTGGTTATGGAGTTGGACAAGTAAGTTATATTGCAGTTGAGATTTTAAAACTGAGAAAAATAAGATAG	MDTMMMDKFDSLTFDKLSEIVGGNVAYDIGYGVGQVSYIAVEILKLRKIR*	MDTMMMDKFDSLTFDKLSEIVGG	NVAYDIGYGVGQVSYIAVEILKLRKIR*	23	28	0.344444	3036.71	9.73602	1.99935
39-01 S14	1594693	1594842	150	ATGGTGACATTTATGTCACTATTTTTTAT	ATGAAAAATACATTTCAAAAAATTGATATTAAAGATTTAGCAATTGTAGTTGGTGGAAGTATTTACTCATCTGTAGGATATGGAGTCGGAGTAGTTACTCACACGGTTTATGATTTTGGTCGTGGATTTGTAGATGGATTTAGAGGTTAA	MKNTFQKIDIKDLAIVVGGSIYSSVGYGVGVVTHTVYDFGRGFVDGFRG*	MKNTFQKIDIKDLAIVVGG	SIYSSVGYGVGVVTHTVYDFGRGFVDGFRG*	19	31	0.28	3197.56	7.52846	0.239453
39-01 S14	1594864	1595007	144	ATGGTGACATTTATGTCACTATTTTTTAT	ATGATGATGGATAAATTTGATTCTTTAACCTTTGATAAGCTTTCTGAAATTGTTGGGGGAAATGTAGCATATGACATTGGTTATGGAGTTGGACAAGTAAGTTATATTGCAGTTGAGATTTTAAAACTGAGAAAAATAAGATAG	MMMDKFDSLTFDKLSEIVGGNVAYDIGYGVGQVSYIAVEILKLRKIR*	MMMDKFDSLTFDKLSEIVGG	NVAYDIGYGVGQVSYIAVEILKLRKIR*	20	28	0.344444	3036.71	9.73602	1.99935
39-01 S14	1594867	1595007	141	ATGGTGACATTTATGTCACTATTTTTTAT	ATGATGGATAAATTTGATTCTTTAACCTTTGATAAGCTTTCTGAAATTGTTGGGGGAAATGTAGCATATGACATTGGTTATGGAGTTGGACAAGTAAGTTATATTGCAGTTGAGATTTTAAAACTGAGAAAAATAAGATAG	MMDKFDSLTFDKLSEIVGGNVAYDIGYGVGQVSYIAVEILKLRKIR*	MMDKFDSLTFDKLSEIVGG	NVAYDIGYGVGQVSYIAVEILKLRKIR*	19	28	0.344444	3036.71	9.73602	1.99935
39-01 S14	1594870	1595007	138	ATGGTGACATTTATGTCACTATTTTTTAT	ATGGATAAATTTGATTCTTTAACCTTTGATAAGCTTTCTGAAATTGTTGGGGGAAATGTAGCATATGACATTGGTTATGGAGTTGGACAAGTAAGTTATATTGCAGTTGAGATTTTAAAACTGAGAAAAATAAGATAG	MDKFDSLTFDKLSEIVGGNVAYDIGYGVGQVSYIAVEILKLRKIR*	MDKFDSLTFDKLSEIVGG	NVAYDIGYGVGQVSYIAVEILKLRKIR*	18	28	0.344444	3036.71	9.73602	1.99935
39-07 S15	351180	351329	150	ATAGTGACATTTATGTCACTATTTTTTTG	ATGCGAACTAAGGCATATGGTGAAGAGCTCAATGCTGAAACCTTAGAAAATGTTACAGGGGGTGGTTTTGTATCTAAACCTCAAACCTTACCTGAACGATTGGGTTGGAATAAATGGTGGTTGAAAAGAAGACCTCCTTATGGCGATTAG	MRTKAYGEELNAETLENVTGGGFVSKPQTLPERLGWNKWWLKRRPPYGD*	MRTKAYGEELNAETLENVTGG	GFVSKPQTLPERLGWNKWWLKRRPPYGD*	21	29	-1.21071	3410.82	11.0904	4.00077
39-07 S15	1643378	1643545	168	ATGGTGACATTTATGTCACTACTTTTTTA	ATGACTAAGACCATTAACAATCGTAAAAACATGACTACTCAAGAACTTGAAGCTGTATCAGGTGGAGTGGTTCCTTGGGCCGCTATTTCTGTTGGCATTGCTGCTGCAAAACTGACTTATGACCTTAGCTATGCTGCAGGTAAGTCTTTCTATAACCTCACCCACTAA	MTKTINNRKNMTTQELEAVSGGVVPWAAISVGIAAAKLTYDLSYAAGKSFYNLTH*	MTKTINNRKNMTTQELEAVSGG	VVPWAAISVGIAAAKLTYDLSYAAGKSFYNLTH*	22	34	0.587879	3496.84	9.03496	1.23835
39-07 S15	1643194	1643358	165	ATGGTGACATTTATGTCACTACTTTTTTA	ATGACAATGATTAATAAAGAAATGAAGGCAGCTGACCTAGCCTCAGTAACAGGAGGCGGATGGAAGACTAACCTTGCCATTGGAGGGCTCTGCCTAGCTTCAGGACCTATTGGAACTATGATGTGCCTTGGAGCCTACAATGGCTACATGGACTCTGCGCGATAA	MTMINKEMKAADLASVTGGGWKTNLAIGGLCLASGPIGTMMCLGAYNGYMDSAR*	MTMINKEMKAADLASVTGG	GWKTNLAIGGLCLASGPIGTMMCLGAYNGYMDSAR*	19	36	0.351429	3591.68	8.21289	0.937738
39-07 S15	1643200	1643358	159	ATGGTGACATTTATGTCACTACTTTTTTA	ATGATTAATAAAGAAATGAAGGCAGCTGACCTAGCCTCAGTAACAGGAGGCGGATGGAAGACTAACCTTGCCATTGGAGGGCTCTGCCTAGCTTCAGGACCTATTGGAACTATGATGTGCCTTGGAGCCTACAATGGCTACATGGACTCTGCGCGATAA	MINKEMKAADLASVTGGGWKTNLAIGGLCLASGPIGTMMCLGAYNGYMDSAR*	MINKEMKAADLASVTGG	GWKTNLAIGGLCLASGPIGTMMCLGAYNGYMDSAR*	17	36	0.351429	3591.68	8.21289	0.937738
39-07 S15	1043390	1043620	231	GTAGTGACATTTATGTCACTACTTTTTTG	ATGACGACACAAATCATTAACAATTTTAACTCACTTAATTCCGAAGATCTTTCTACTGTTAAGGGTGGAGCATGTAGTTTTTGGGGAGCTACAGCTGCCGTAGGCGTCGGGGCTGTTGGAGGAGCCATTAAAGGTGGTATTCAAACAGGTACTTGGCAAGGTGCAGCCTTAAAGGGTATTGGTTATGGTATTAAAGATGGGATTACTTATGGACTTATTTGTCGTTATTAG	MTTQIINNFNSLNSEDLSTVKGGACSFWGATAAVGVGAVGGAIKGGIQTGTWQGAALKGIGYGIKDGITYGLICRY*	MTTQIINNFNSLNSEDLSTVKGG	ACSFWGATAAVGVGAVGGAIKGGIQTGTWQGAALKGIGYGIKDGITYGLICRY*	23	54	0.524528	5203.67	9.26645	2.93663
39-07 S15	1051989	1052168	180	GTAGTGACATAAATGTCACTACTTTTTTG	ATGACAACACAAACAATTAACACTTTTGAAACACTCGATCTCGAGGCACTTGCAAACGTTGAAGGTGGCGGATGGGTTAAGTGTTATGCCGGCACAATTGGCTCTGCTCTAGTAGGATCAGCAGGCGGCCCAGTAGGTTACTGGGGAGGAGCTTTAGTTGGCTATGCTACATTCTGCTAA	MTTQTINTFETLDLEALANVEGGGWVKCYAGTIGSALVGSAGGPVGYWGGALVGYATFC*	MTTQTINTFETLDLEALANVEGG	GWVKCYAGTIGSALVGSAGGPVGYWGGALVGYATFC*	23	37	0.763889	3494.68	8.2049	0.936154
39-09 S16	2916616	2916786	171	TTAGTGACATCTATGTCACTATTTTTTTC	ATGTTAGAAATAAATATGATTTATTCTGACTTATCACTTACTGAACTTGCTCAAATTAATGGGGGAGGGATTATGTCAAGTGTAGCTGGACTTGTTAAAGATACCTGGGGAACGTTATATTCTACAGGAAGAGACTTTGGACGTAGCGTTGTTAACGCTGCTATGCCTTAA	MLEINMIYSDLSLTELAQINGGGIMSSVAGLVKDTWGTLYSTGRDFGRSVVNAAMP*	MLEINMIYSDLSLTELAQINGG	GIMSSVAGLVKDTWGTLYSTGRDFGRSVVNAAMP*	22	35	0.188235	3542.76	9.2964	1.00063
39-09 S16	2916798	2916968	171	TTAGTGACATCTATGTCACTATTTTTTTC	ATGTATAGAGAAAAGAGAAATGATGAAGAACTGAATATTAATGATCTTGCCATGATTAATGGTGGAGTAGCCCCTGTAGTTATTGCTGTAGGGGTAATTGCGACACCATTTGTATTGGGCGCGATTGCTGGAGGCGCAGATGAGTACGCAAGGAAGAGAGGGCATCACTGA	MYREKRNDEELNINDLAMINGGVAPVVIAVGVIATPFVLGAIAGGADEYARKRGHH*	MYREKRNDEELNINDLAMINGG	VAPVVIAVGVIATPFVLGAIAGGADEYARKRGHH*	22	35	0.717647	3410.89	9.30118	1.4816
39-09 S16	2916631	2916786	156	TTAGTGACATCTATGTCACTATTTTTTTC	ATGATTTATTCTGACTTATCACTTACTGAACTTGCTCAAATTAATGGGGGAGGGATTATGTCAAGTGTAGCTGGACTTGTTAAAGATACCTGGGGAACGTTATATTCTACAGGAAGAGACTTTGGACGTAGCGTTGTTAACGCTGCTATGCCTTAA	MIYSDLSLTELAQINGGGIMSSVAGLVKDTWGTLYSTGRDFGRSVVNAAMP*	MIYSDLSLTELAQINGG	GIMSSVAGLVKDTWGTLYSTGRDFGRSVVNAAMP*	17	35	0.188235	3542.76	9.2964	1.00063
39-09 S16	3175051	3175200	150	ATAGTGACATTTATGTCACTATTTTTTTG	ATGCGAACTAAGGCATATGGTGAAGAGCTCAATGCTGAAACCTTAGAAAATGTTACAGGGGGTGGTTTTGTATCTAAACCTCAAACCTTACCTGAACGATTGGGTTGGAATAAATGGTGGTTGAAAAGAAGACCTCCTTATGGCGATTAG	MRTKAYGEELNAETLENVTGGGFVSKPQTLPERLGWNKWWLKRRPPYGD*	MRTKAYGEELNAETLENVTGG	GFVSKPQTLPERLGWNKWWLKRRPPYGD*	21	29	-1.21071	3410.82	11.0904	4.00077
39-09 S16	3256781	3256960	180	GTAGTGACATAAATGTCACTACTTTTTTG	ATGACAACACAAACAATTAACACTTTTGAAACACTCGATCTCGAGGCACTTGCAAACGTTGAAGGTGGCGGATGGGTTAAGTGTTATGCCGGCACAATTGGCTCTGCTCTAGTAGGATCAGCAGGCGGCCCAGTAGGTTACTGGGGAGGAGCTTTAGTTGGCTATGCTACATTCTGCTAA	MTTQTINTFETLDLEALANVEGGGWVKCYAGTIGSALVGSAGGPVGYWGGALVGYATFC*	MTTQTINTFETLDLEALANVEGG	GWVKCYAGTIGSALVGSAGGPVGYWGGALVGYATFC*	23	37	0.763889	3494.68	8.2049	0.936154
39-09 S16	1516854	1517084	231	GTAGTGACATTTATGTCACTACTTTTTTG	ATGACGACACAAATCATTAACAATTTTAACTCACTTAATTCCGAAGATCTTTCTACTGTTAAGGGTGGAGCATGTAGTTTTTGGGGAGCTACAGCTGCCGTAGGCGTCGGGGCTGTTGGAGGAGCCATTAAAGGTGGTATTCAAACAGGTACTTGGCAAGGTGCAGCCTTAAAGGGTATTGGTTATGGTATTAAAGATGGGATTACTTATGGACTTATTTGTCGTTATTAG	MTTQIINNFNSLNSEDLSTVKGGACSFWGATAAVGVGAVGGAIKGGIQTGTWQGAALKGIGYGIKDGITYGLICRY*	MTTQIINNFNSLNSEDLSTVKGG	ACSFWGATAAVGVGAVGGAIKGGIQTGTWQGAALKGIGYGIKDGITYGLICRY*	23	54	0.524528	5203.67	9.26645	2.93663
39-09 S16	2387317	2387484	168	ATGGTGACATTTATGTCACTACTTTTTTA	ATGACTAAGACCATTAACAATCGTAAAAACATGACTACTCAAGAACTTGAAGCTGTATCAGGTGGAGTGGTTCCTTGGGCCGCTATTTCTGTTGGCATTGCTGCTGCAAAACTGACTTATGACCTTAGCTATGCTGCAGGTAAGTCTTTCTATAACCTCACCCACTAA	MTKTINNRKNMTTQELEAVSGGVVPWAAISVGIAAAKLTYDLSYAAGKSFYNLTH*	MTKTINNRKNMTTQELEAVSGG	VVPWAAISVGIAAAKLTYDLSYAAGKSFYNLTH*	22	34	0.587879	3496.84	9.03496	1.23835
39-09 S16	2387133	2387297	165	ATGGTGACATTTATGTCACTACTTTTTTA	ATGACAATGATTAATAAAGAAATGAAGGCAGCTGACCTAGCCTCAGTAACAGGAGGCGGATGGAAGACTAACCTTGCCATTGGAGGGCTCTGCCTAGCTTCAGGACCTATTGGAACTATGATGTGCCTTGGAGCCTACAATGGCTACATGGACTCTGCGCGATAA	MTMINKEMKAADLASVTGGGWKTNLAIGGLCLASGPIGTMMCLGAYNGYMDSAR*	MTMINKEMKAADLASVTGG	GWKTNLAIGGLCLASGPIGTMMCLGAYNGYMDSAR*	19	36	0.351429	3591.68	8.21289	0.937738
39-09 S16	2387139	2387297	159	ATGGTGACATTTATGTCACTACTTTTTTA	ATGATTAATAAAGAAATGAAGGCAGCTGACCTAGCCTCAGTAACAGGAGGCGGATGGAAGACTAACCTTGCCATTGGAGGGCTCTGCCTAGCTTCAGGACCTATTGGAACTATGATGTGCCTTGGAGCCTACAATGGCTACATGGACTCTGCGCGATAA	MINKEMKAADLASVTGGGWKTNLAIGGLCLASGPIGTMMCLGAYNGYMDSAR*	MINKEMKAADLASVTGG	GWKTNLAIGGLCLASGPIGTMMCLGAYNGYMDSAR*	17	36	0.351429	3591.68	8.21289	0.937738
40-02 S18	429687	429845	159	ATAGTGACATTTATGTCACTATTTTTTTG	ATGTATATGGATACAATGATGATGGATAAATTTGATTCTTTAACCTTTGATAAGCTTTCTGAAATTGTTGGGGGAAATGTAGCATATGACATTGGTTATGGAGTTGGACAAGTAAGTTATATTGCAGTTGAGATTTTAAAACTGAGAAAAATAAGATAG	MYMDTMMMDKFDSLTFDKLSEIVGGNVAYDIGYGVGQVSYIAVEILKLRKIR*	MYMDTMMMDKFDSLTFDKLSEIVGG	NVAYDIGYGVGQVSYIAVEILKLRKIR*	25	28	0.344444	3036.71	9.73602	1.99935
40-02 S18	429693	429845	153	ATAGTGACATTTATGTCACTATTTTTTTG	ATGGATACAATGATGATGGATAAATTTGATTCTTTAACCTTTGATAAGCTTTCTGAAATTGTTGGGGGAAATGTAGCATATGACATTGGTTATGGAGTTGGACAAGTAAGTTATATTGCAGTTGAGATTTTAAAACTGAGAAAAATAAGATAG	MDTMMMDKFDSLTFDKLSEIVGGNVAYDIGYGVGQVSYIAVEILKLRKIR*	MDTMMMDKFDSLTFDKLSEIVGG	NVAYDIGYGVGQVSYIAVEILKLRKIR*	23	28	0.344444	3036.71	9.73602	1.99935
40-02 S18	429531	429680	150	ATAGTGACATTTATGTCACTATTTTTTTG	ATGAAAAATACATTTCAAAAAATTGATATTAAAGATTTAGCAATTGTAGTTGGTGGAAGTATTTACTCATCTGTAGGATATGGAGTCGGAGTAGTTACTCACACGGTTTATGATTTTGGTCGTGGATTTGTAGATGGATTTAGAGGTTAA	MKNTFQKIDIKDLAIVVGGSIYSSVGYGVGVVTHTVYDFGRGFVDGFRG*	MKNTFQKIDIKDLAIVVGG	SIYSSVGYGVGVVTHTVYDFGRGFVDGFRG*	19	31	0.28	3197.56	7.52846	0.239453
40-02 S18	428769	428918	150	ATAGTGACATTTATGTCACTATTTTTTTG	ATGCGAACTAAGGCATATGGCGAAGAGCTCACTGCTGAAACGTTAGAAAATGTCACAGGGGGTGATTTTGTATCTAGACCTCAAACCTTACCTGAACGATTGGGTTGGAACAAATGGTGGTTGAAAAGAAGACCTCCTTATGGCGATTAG	MRTKAYGEELTAETLENVTGGDFVSRPQTLPERLGWNKWWLKRRPPYGD*	MRTKAYGEELTAETLENVTGG	DFVSRPQTLPERLGWNKWWLKRRPPYGD*	21	29	-1.34286	3496.83	10.8569	3.00172
40-02 S18	429702	429845	144	ATAGTGACATTTATGTCACTATTTTTTTG	ATGATGATGGATAAATTTGATTCTTTAACCTTTGATAAGCTTTCTGAAATTGTTGGGGGAAATGTAGCATATGACATTGGTTATGGAGTTGGACAAGTAAGTTATATTGCAGTTGAGATTTTAAAACTGAGAAAAATAAGATAG	MMMDKFDSLTFDKLSEIVGGNVAYDIGYGVGQVSYIAVEILKLRKIR*	MMMDKFDSLTFDKLSEIVGG	NVAYDIGYGVGQVSYIAVEILKLRKIR*	20	28	0.344444	3036.71	9.73602	1.99935
40-02 S18	429705	429845	141	ATAGTGACATTTATGTCACTATTTTTTTG	ATGATGGATAAATTTGATTCTTTAACCTTTGATAAGCTTTCTGAAATTGTTGGGGGAAATGTAGCATATGACATTGGTTATGGAGTTGGACAAGTAAGTTATATTGCAGTTGAGATTTTAAAACTGAGAAAAATAAGATAG	MMDKFDSLTFDKLSEIVGGNVAYDIGYGVGQVSYIAVEILKLRKIR*	MMDKFDSLTFDKLSEIVGG	NVAYDIGYGVGQVSYIAVEILKLRKIR*	19	28	0.344444	3036.71	9.73602	1.99935
40-02 S18	429708	429845	138	ATAGTGACATTTATGTCACTATTTTTTTG	ATGGATAAATTTGATTCTTTAACCTTTGATAAGCTTTCTGAAATTGTTGGGGGAAATGTAGCATATGACATTGGTTATGGAGTTGGACAAGTAAGTTATATTGCAGTTGAGATTTTAAAACTGAGAAAAATAAGATAG	MDKFDSLTFDKLSEIVGGNVAYDIGYGVGQVSYIAVEILKLRKIR*	MDKFDSLTFDKLSEIVGG	NVAYDIGYGVGQVSYIAVEILKLRKIR*	18	28	0.344444	3036.71	9.73602	1.99935
40-02 S18	429687	429845	159	ATGGTGACATTTATGTCACTATTTTTTAT	ATGTATATGGATACAATGATGATGGATAAATTTGATTCTTTAACCTTTGATAAGCTTTCTGAAATTGTTGGGGGAAATGTAGCATATGACATTGGTTATGGAGTTGGACAAGTAAGTTATATTGCAGTTGAGATTTTAAAACTGAGAAAAATAAGATAG	MYMDTMMMDKFDSLTFDKLSEIVGGNVAYDIGYGVGQVSYIAVEILKLRKIR*	MYMDTMMMDKFDSLTFDKLSEIVGG	NVAYDIGYGVGQVSYIAVEILKLRKIR*	25	28	0.344444	3036.71	9.73602	1.99935
40-02 S18	429693	429845	153	ATGGTGACATTTATGTCACTATTTTTTAT	ATGGATACAATGATGATGGATAAATTTGATTCTTTAACCTTTGATAAGCTTTCTGAAATTGTTGGGGGAAATGTAGCATATGACATTGGTTATGGAGTTGGACAAGTAAGTTATATTGCAGTTGAGATTTTAAAACTGAGAAAAATAAGATAG	MDTMMMDKFDSLTFDKLSEIVGGNVAYDIGYGVGQVSYIAVEILKLRKIR*	MDTMMMDKFDSLTFDKLSEIVGG	NVAYDIGYGVGQVSYIAVEILKLRKIR*	23	28	0.344444	3036.71	9.73602	1.99935
40-02 S18	429531	429680	150	ATGGTGACATTTATGTCACTATTTTTTAT	ATGAAAAATACATTTCAAAAAATTGATATTAAAGATTTAGCAATTGTAGTTGGTGGAAGTATTTACTCATCTGTAGGATATGGAGTCGGAGTAGTTACTCACACGGTTTATGATTTTGGTCGTGGATTTGTAGATGGATTTAGAGGTTAA	MKNTFQKIDIKDLAIVVGGSIYSSVGYGVGVVTHTVYDFGRGFVDGFRG*	MKNTFQKIDIKDLAIVVGG	SIYSSVGYGVGVVTHTVYDFGRGFVDGFRG*	19	31	0.28	3197.56	7.52846	0.239453
40-02 S18	429702	429845	144	ATGGTGACATTTATGTCACTATTTTTTAT	ATGATGATGGATAAATTTGATTCTTTAACCTTTGATAAGCTTTCTGAAATTGTTGGGGGAAATGTAGCATATGACATTGGTTATGGAGTTGGACAAGTAAGTTATATTGCAGTTGAGATTTTAAAACTGAGAAAAATAAGATAG	MMMDKFDSLTFDKLSEIVGGNVAYDIGYGVGQVSYIAVEILKLRKIR*	MMMDKFDSLTFDKLSEIVGG	NVAYDIGYGVGQVSYIAVEILKLRKIR*	20	28	0.344444	3036.71	9.73602	1.99935
40-02 S18	429705	429845	141	ATGGTGACATTTATGTCACTATTTTTTAT	ATGATGGATAAATTTGATTCTTTAACCTTTGATAAGCTTTCTGAAATTGTTGGGGGAAATGTAGCATATGACATTGGTTATGGAGTTGGACAAGTAAGTTATATTGCAGTTGAGATTTTAAAACTGAGAAAAATAAGATAG	MMDKFDSLTFDKLSEIVGGNVAYDIGYGVGQVSYIAVEILKLRKIR*	MMDKFDSLTFDKLSEIVGG	NVAYDIGYGVGQVSYIAVEILKLRKIR*	19	28	0.344444	3036.71	9.73602	1.99935
40-02 S18	429708	429845	138	ATGGTGACATTTATGTCACTATTTTTTAT	ATGGATAAATTTGATTCTTTAACCTTTGATAAGCTTTCTGAAATTGTTGGGGGAAATGTAGCATATGACATTGGTTATGGAGTTGGACAAGTAAGTTATATTGCAGTTGAGATTTTAAAACTGAGAAAAATAAGATAG	MDKFDSLTFDKLSEIVGGNVAYDIGYGVGQVSYIAVEILKLRKIR*	MDKFDSLTFDKLSEIVGG	NVAYDIGYGVGQVSYIAVEILKLRKIR*	18	28	0.344444	3036.71	9.73602	1.99935
40-02 S18	990523	990690	168	ATGGTGACATTTATGTCACTACTTTTTTA	ATGACTAAGACCATTAACAATCGTAAAAACATGACTACTCAAGAACTTGAAGCTGTATCAGGTGGAGTGGTTCCTTGGGCCGCTATTTCTGTTGGCATTGCTGCTGCAAAACTGACTTATGACCTTAGCTATGCTGCAGGTAAGTCTTTCTATAACCTCACCCACTAA	MTKTINNRKNMTTQELEAVSGGVVPWAAISVGIAAAKLTYDLSYAAGKSFYNLTH*	MTKTINNRKNMTTQELEAVSGG	VVPWAAISVGIAAAKLTYDLSYAAGKSFYNLTH*	22	34	0.587879	3496.84	9.03496	1.23835
40-02 S18	990339	990503	165	ATGGTGACATTTATGTCACTACTTTTTTA	ATGACAATGATTAATAAAGAAATGAAGGCAGCTGACCTAGCCTCAGTAACAGGAGGCGGATGGAAGACTAACCTTGCCATTGGAGGGCTCTGCCTAGCTTCAGGACCTATTGGAACTATGATGTGCCTTGGAGCCTACAATGGCTACATGGACTCTGCGCGATAA	MTMINKEMKAADLASVTGGGWKTNLAIGGLCLASGPIGTMMCLGAYNGYMDSAR*	MTMINKEMKAADLASVTGG	GWKTNLAIGGLCLASGPIGTMMCLGAYNGYMDSAR*	19	36	0.351429	3591.68	8.21289	0.937738
40-02 S18	990345	990503	159	ATGGTGACATTTATGTCACTACTTTTTTA	ATGATTAATAAAGAAATGAAGGCAGCTGACCTAGCCTCAGTAACAGGAGGCGGATGGAAGACTAACCTTGCCATTGGAGGGCTCTGCCTAGCTTCAGGACCTATTGGAACTATGATGTGCCTTGGAGCCTACAATGGCTACATGGACTCTGCGCGATAA	MINKEMKAADLASVTGGGWKTNLAIGGLCLASGPIGTMMCLGAYNGYMDSAR*	MINKEMKAADLASVTGG	GWKTNLAIGGLCLASGPIGTMMCLGAYNGYMDSAR*	17	36	0.351429	3591.68	8.21289	0.937738
40-02 S18	1970170	1970400	231	GTAGTGACATTTATGTCACTACTTTTTTG	ATGACGACACAAATCATTAACAATTTTAACTCACTTAATTCCGAAGATCTTTCTACTGTTAAGGGTGGAGCATGTAGTTTTTGGGGAGCTACAGCTGCCGTAGGCGTCGGGGCTGTTGGAGGAGCCATTAAAGGTGGTATTCAAACAGGTACTTGGCAAGGTGCAGCCTTAAAGGGTATTGGTTATGGTATTAAAGATGGGATTACTTATGGACTTATTTGTCGTTATTAG	MTTQIINNFNSLNSEDLSTVKGGACSFWGATAAVGVGAVGGAIKGGIQTGTWQGAALKGIGYGIKDGITYGLICRY*	MTTQIINNFNSLNSEDLSTVKGG	ACSFWGATAAVGVGAVGGAIKGGIQTGTWQGAALKGIGYGIKDGITYGLICRY*	23	54	0.524528	5203.67	9.26645	2.93663
40-02 S18	1978785	1978964	180	GTAGTGACATTTATGTCACTACTTTTTTG	ATGACAACACAAACAATGAACAATTTTGAAACACTCGATCTCGAGGCACTTGCAAACGTTGAAGGTGGCGGATGGGTTAAGTGTTATGCCGGCACAATCGGATCTGCTCTAGTAGGATCAGCTGGAGGCCCAGTAGGTTACTGGGGAGGAGCTTTAGTTGGTTATGCCACATTCTGCTAA	MTTQTMNNFETLDLEALANVEGGGWVKCYAGTIGSALVGSAGGPVGYWGGALVGYATFC*	MTTQTMNNFETLDLEALANVEGG	GWVKCYAGTIGSALVGSAGGPVGYWGGALVGYATFC*	23	37	0.763889	3494.68	8.2049	0.936154
40-02 S18	1978800	1978964	165	GTAGTGACATTTATGTCACTACTTTTTTG	ATGAACAATTTTGAAACACTCGATCTCGAGGCACTTGCAAACGTTGAAGGTGGCGGATGGGTTAAGTGTTATGCCGGCACAATCGGATCTGCTCTAGTAGGATCAGCTGGAGGCCCAGTAGGTTACTGGGGAGGAGCTTTAGTTGGTTATGCCACATTCTGCTAA	MNNFETLDLEALANVEGGGWVKCYAGTIGSALVGSAGGPVGYWGGALVGYATFC*	MNNFETLDLEALANVEGG	GWVKCYAGTIGSALVGSAGGPVGYWGGALVGYATFC*	18	37	0.763889	3494.68	8.2049	0.936154
726_SSAL	397950	398099	150	ATAGTGACATTTATGTCACTATTTTTTTG	ATGCGAACTAAGGTATATGGCGAAGAGCTCACTGCTGAAACGTTAGAAAATGTCACAGGGGGTGATTTTGTATCTAGACCTCAAACCTTACCTGAACGATTGGGTTGGAACAAATGGTGGTTGAAAAGAAAATACCCTTATGGTGATTAA	MRTKVYGEELTAETLENVTGGDFVSRPQTLPERLGWNKWWLKRKYPYGD*	MRTKVYGEELTAETLENVTGG	DFVSRPQTLPERLGWNKWWLKRKYPYGD*	21	29	-1.31071	3534.83	10.3219	3.00077
726_SSAL	933332	933565	234	GTGGTGACATTTATGTCACTACTTTTTTG	ATGATAACACAAACAATGAACAATTTTGAAACACTCGATCTTGAGGCACTTGCAAACGTTGAAGGTGGAAATAGATGTAAAGATTTAATCTTTGGAGGAGCTTTAACTGGCGCAGGTGCTGGATTTACAGGTGGTATGGCAGCATTTGGTGTTACAGCATTTCCAGGAGCATTTGTAGGAGCACATGTTGGAGCAGTTGCTGGTGGGCTAGCATGTATCGGAGCGAGCTTTTAG	MITQTMNNFETLDLEALANVEGGNRCKDLIFGGALTGAGAGFTGGMAAFGVTAFPGAFVGAHVGAVAGGLACIGASF*	MITQTMNNFETLDLEALANVEGG	NRCKDLIFGGALTGAGAGFTGGMAAFGVTAFPGAFVGAHVGAVAGGLACIGASF*	23	55	0.996296	4987.47	8.24126	1.17958
726_SSAL	933347	933565	219	GTGGTGACATTTATGTCACTACTTTTTTG	ATGAACAATTTTGAAACACTCGATCTTGAGGCACTTGCAAACGTTGAAGGTGGAAATAGATGTAAAGATTTAATCTTTGGAGGAGCTTTAACTGGCGCAGGTGCTGGATTTACAGGTGGTATGGCAGCATTTGGTGTTACAGCATTTCCAGGAGCATTTGTAGGAGCACATGTTGGAGCAGTTGCTGGTGGGCTAGCATGTATCGGAGCGAGCTTTTAG	MNNFETLDLEALANVEGGNRCKDLIFGGALTGAGAGFTGGMAAFGVTAFPGAFVGAHVGAVAGGLACIGASF*	MNNFETLDLEALANVEGG	NRCKDLIFGGALTGAGAGFTGGMAAFGVTAFPGAFVGAHVGAVAGGLACIGASF*	18	55	0.996296	4987.47	8.24126	1.17958
726_SSAL	933578	933766	189	GTGGTGACATTTATGTCACTACTTTTTTG	ATGAATGTGACTAAGTATAATAAGATGTGCGATGCTGAGCTAGAAATTATTTCTGGTGGTGGGAAAGTTGGAGCAGTAATTGGTGGCTGTCTAGGTGGTATGCTCATGGCATGGGCAGCAGGACCTGTTTCCGCAGGGGGTTATACTATGATATGTGCTACTTCGGGGCTTGCAAATGCTTATTTTTGA	MNVTKYNKMCDAELEIISGGGKVGAVIGGCLGGMLMAWAAGPVSAGGYTMICATSGLANAYF*	MNVTKYNKMCDAELEIISGG	GKVGAVIGGCLGGMLMAWAAGPVSAGGYTMICATSGLANAYF*	20	43	0.985714	3992.91	8.21291	0.936947
726_SSAL	933584	933766	183	GTGGTGACATTTATGTCACTACTTTTTTG	GTGACTAAGTATAATAAGATGTGCGATGCTGAGCTAGAAATTATTTCTGGTGGTGGGAAAGTTGGAGCAGTAATTGGTGGCTGTCTAGGTGGTATGCTCATGGCATGGGCAGCAGGACCTGTTTCCGCAGGGGGTTATACTATGATATGTGCTACTTCGGGGCTTGCAAATGCTTATTTTTGA	VTKYNKMCDAELEIISGGGKVGAVIGGCLGGMLMAWAAGPVSAGGYTMICATSGLANAYF*	VTKYNKMCDAELEIISGG	GKVGAVIGGCLGGMLMAWAAGPVSAGGYTMICATSGLANAYF*	18	43	0.985714	3992.91	8.21291	0.936947
726_SSAL	1670236	1670403	168	ATGGTGACATTTATGTCACTACTTTTTTA	ATGACTAAGACCATTAACAATCGTAAAAACATGACTACTCAAGAACTTGAAGCTGTATCAGGTGGAGTAGTTCCTTGGGCCGCTATTTCTGTTGGCATCGCTGCTGCAAAACTGACTTATGACCTTAGCTATGCCGCAGGTAAATCTTTCTATAACCTCACCCACTAA	MTKTINNRKNMTTQELEAVSGGVVPWAAISVGIAAAKLTYDLSYAAGKSFYNLTH*	MTKTINNRKNMTTQELEAVSGG	VVPWAAISVGIAAAKLTYDLSYAAGKSFYNLTH*	22	34	0.587879	3496.84	9.03496	1.23835
726_SSAL	1670052	1670216	165	ATGGTGACATTTATGTCACTACTTTTTTA	ATGACAATGATTAACAAAGAAATGAAGGCAGCTGAGCTAGCCTCAGTAACAGGAGGCGGATGGAAGACCAACATCGCCATTGGAGGGCTCTGCCTAGCTTCAGGACCTATTGGAACTATGGTATGCCTTGGAGCCTACAATGGCTATATGGACTCTGCACGATAA	MTMINKEMKAAELASVTGGGWKTNIAIGGLCLASGPIGTMVCLGAYNGYMDSAR*	MTMINKEMKAAELASVTGG	GWKTNIAIGGLCLASGPIGTMVCLGAYNGYMDSAR*	19	36	0.437143	3559.71	8.21289	0.937738
726_SSAL	1670058	1670216	159	ATGGTGACATTTATGTCACTACTTTTTTA	ATGATTAACAAAGAAATGAAGGCAGCTGAGCTAGCCTCAGTAACAGGAGGCGGATGGAAGACCAACATCGCCATTGGAGGGCTCTGCCTAGCTTCAGGACCTATTGGAACTATGGTATGCCTTGGAGCCTACAATGGCTATATGGACTCTGCACGATAA	MINKEMKAAELASVTGGGWKTNIAIGGLCLASGPIGTMVCLGAYNGYMDSAR*	MINKEMKAAELASVTGG	GWKTNIAIGGLCLASGPIGTMVCLGAYNGYMDSAR*	17	36	0.437143	3559.71	8.21289	0.937738
726_SSAL	1801278	1801508	231	GTAGTGACATTTATGTCACTACTTTTTTG	ATGACAACACAAATCATTAACAATTTTAACTCACTTAATTCCGAAGATCTTTCTACTGTTAAGGGTGGAGCATGTAGTTTTTGGGGAGCTACAGCTGCCGTAGGCGTCGGGGCTGTTGGAGGAGCCATTAAAGGTGGTATTCAAACAGGTACTTGGCAAGGTGCAGCCTTAAAGGGTATTGGTTATGGTATTAAAGATGGGATTACTTATGGCCTTATTTGTCGTTATTAG	MTTQIINNFNSLNSEDLSTVKGGACSFWGATAAVGVGAVGGAIKGGIQTGTWQGAALKGIGYGIKDGITYGLICRY*	MTTQIINNFNSLNSEDLSTVKGG	ACSFWGATAAVGVGAVGGAIKGGIQTGTWQGAALKGIGYGIKDGITYGLICRY*	23	54	0.524528	5203.67	9.26645	2.93663
726_SSAL	1813930	1814109	180	GTGGTGACATTTATGTCACTACTTTTTTG	ATGACAACACAAACAATGAACACTTTTGAAACACTCGATCTCGAGGCACTTGCAAACGTTGAAGGTGGCGGATGGGTTAAGTGTTATGCCGGCACAATTGGCTCTGCTCTAGTAGGATCAGCAGGAGGCCCAGTAGGTTACTGGGGAGGAGCTTTAGTTGGTTACGCTACATTCTGCTAA	MTTQTMNTFETLDLEALANVEGGGWVKCYAGTIGSALVGSAGGPVGYWGGALVGYATFC*	MTTQTMNTFETLDLEALANVEGG	GWVKCYAGTIGSALVGSAGGPVGYWGGALVGYATFC*	23	37	0.763889	3494.68	8.2049	0.936154
726_SSAL	1813945	1814109	165	GTGGTGACATTTATGTCACTACTTTTTTG	ATGAACACTTTTGAAACACTCGATCTCGAGGCACTTGCAAACGTTGAAGGTGGCGGATGGGTTAAGTGTTATGCCGGCACAATTGGCTCTGCTCTAGTAGGATCAGCAGGAGGCCCAGTAGGTTACTGGGGAGGAGCTTTAGTTGGTTACGCTACATTCTGCTAA	MNTFETLDLEALANVEGGGWVKCYAGTIGSALVGSAGGPVGYWGGALVGYATFC*	MNTFETLDLEALANVEGG	GWVKCYAGTIGSALVGSAGGPVGYWGGALVGYATFC*	18	37	0.763889	3494.68	8.2049	0.936154
84-12 S20	468200	468379	180	GTGGTGACATACATGTCACTACTTTTTTG	ATGACAACACAAACAATGAACACTTTTGAAACACTCGATCTCGAGGCACTTGCAAACGTTGAAGGTGGCGGATGGGTTAAGTGTTATGCCGGCACAATTGGATCTGCTCTAGTAGGATCAGCAGGAGGCCCAGTAGGTTACTGGGGAGGAGCTTTAGTTGGTTACGCCACATTCTGCTAA	MTTQTMNTFETLDLEALANVEGGGWVKCYAGTIGSALVGSAGGPVGYWGGALVGYATFC*	MTTQTMNTFETLDLEALANVEGG	GWVKCYAGTIGSALVGSAGGPVGYWGGALVGYATFC*	23	37	0.763889	3494.68	8.2049	0.936154
84-12 S20	468215	468379	165	GTGGTGACATACATGTCACTACTTTTTTG	ATGAACACTTTTGAAACACTCGATCTCGAGGCACTTGCAAACGTTGAAGGTGGCGGATGGGTTAAGTGTTATGCCGGCACAATTGGATCTGCTCTAGTAGGATCAGCAGGAGGCCCAGTAGGTTACTGGGGAGGAGCTTTAGTTGGTTACGCCACATTCTGCTAA	MNTFETLDLEALANVEGGGWVKCYAGTIGSALVGSAGGPVGYWGGALVGYATFC*	MNTFETLDLEALANVEGG	GWVKCYAGTIGSALVGSAGGPVGYWGGALVGYATFC*	18	37	0.763889	3494.68	8.2049	0.936154
84-12 S20	1879162	1879329	168	ATGGTGACATTTATGTCACTACTTTTTTA	ATGACTAAGACCATTAACAATCGTAAAAACATGACTACTCAAGAACTTGAAGCTGTATCAGGTGGAGTGGTTCCTTGGGCCGCTATTTCTGTTGGCATTGCTGCTGCAAAACTGACTTATGACCTTAGCTATGCTGCAGGTAAGTCTTTCTATAACCTCACCCACTAA	MTKTINNRKNMTTQELEAVSGGVVPWAAISVGIAAAKLTYDLSYAAGKSFYNLTH*	MTKTINNRKNMTTQELEAVSGG	VVPWAAISVGIAAAKLTYDLSYAAGKSFYNLTH*	22	34	0.587879	3496.84	9.03496	1.23835
84-12 S20	1878978	1879142	165	ATGGTGACATTTATGTCACTACTTTTTTA	ATGACAATGATTAATAAAGAAATGAAGGCAGCTGACCTAGCCTCAGTAACAGGAGGCGGATGGAAGACTAACCTTGCCATTGGAGGGCTCTGCCTAGCTTCAGGACCTATTGGAACTATGGTATGCCTTGGAGCCTACAATGGCTACATGGACTCTGCGCGATAA	MTMINKEMKAADLASVTGGGWKTNLAIGGLCLASGPIGTMVCLGAYNGYMDSAR*	MTMINKEMKAADLASVTGG	GWKTNLAIGGLCLASGPIGTMVCLGAYNGYMDSAR*	19	36	0.417143	3559.71	8.21289	0.937738
84-12 S20	1878984	1879142	159	ATGGTGACATTTATGTCACTACTTTTTTA	ATGATTAATAAAGAAATGAAGGCAGCTGACCTAGCCTCAGTAACAGGAGGCGGATGGAAGACTAACCTTGCCATTGGAGGGCTCTGCCTAGCTTCAGGACCTATTGGAACTATGGTATGCCTTGGAGCCTACAATGGCTACATGGACTCTGCGCGATAA	MINKEMKAADLASVTGGGWKTNLAIGGLCLASGPIGTMVCLGAYNGYMDSAR*	MINKEMKAADLASVTGG	GWKTNLAIGGLCLASGPIGTMVCLGAYNGYMDSAR*	17	36	0.417143	3559.71	8.21289	0.937738
84-12 S20	52494	52664	171	TTAGTGACATCTATGTCACTATTTTTTTC	ATGTTAGAAATAAATATGATTTATTCTGACTTATCACTTACTGAACTTGCTCAAATTAATGGGGGAGGGATTATGTCAAGTGTAGCTGGACTTGTTAAAGATACCTGGGGAACGTTATATTCTACAGGAAGAGACTTTGGACGTAGCGTTGTTAACGCTGCTATGCCTTAA	MLEINMIYSDLSLTELAQINGGGIMSSVAGLVKDTWGTLYSTGRDFGRSVVNAAMP*	MLEINMIYSDLSLTELAQINGG	GIMSSVAGLVKDTWGTLYSTGRDFGRSVVNAAMP*	22	35	0.188235	3542.76	9.2964	1.00063
84-12 S20	52676	52846	171	TTAGTGACATCTATGTCACTATTTTTTTC	ATGTATAGAGAAAAGAGAAATGATGAAGAACTGAATATTAATGATCTTGCCATGATTAATGGTGGAGTAGCCCCTGTAGTTATTGCTGTAGGGGTAATTGCGACACCATTTGTATTGGGCGCGATTGCTGGAGGCGCAGATGAGTACGCAAGGAAGAGAGGGCATCACTGA	MYREKRNDEELNINDLAMINGGVAPVVIAVGVIATPFVLGAIAGGADEYARKRGHH*	MYREKRNDEELNINDLAMINGG	VAPVVIAVGVIATPFVLGAIAGGADEYARKRGHH*	22	35	0.717647	3410.89	9.30118	1.4816
84-12 S20	52509	52664	156	TTAGTGACATCTATGTCACTATTTTTTTC	ATGATTTATTCTGACTTATCACTTACTGAACTTGCTCAAATTAATGGGGGAGGGATTATGTCAAGTGTAGCTGGACTTGTTAAAGATACCTGGGGAACGTTATATTCTACAGGAAGAGACTTTGGACGTAGCGTTGTTAACGCTGCTATGCCTTAA	MIYSDLSLTELAQINGGGIMSSVAGLVKDTWGTLYSTGRDFGRSVVNAAMP*	MIYSDLSLTELAQINGG	GIMSSVAGLVKDTWGTLYSTGRDFGRSVVNAAMP*	17	35	0.188235	3542.76	9.2964	1.00063
84-12 S20	2769002	2769196	195	ATGGTGACATTTATGTCACTATTTTTTGT	ATGGTATTGAATTTAGAAAATGTAAACTGTGTTACTCTTCAAGATGAAGAATTGATGATGGTTAACGGAGGTCTTGCACCGATTGTAATTGGTGGAGTTGTCGTAGGTTGGAAGGTCATTGGTGGCGTTGCAGGTGTTATAGCAGCAAGTGGTGCTGCAGGGATTGCAGCAGGTTATTATGCTAATCGTCCTTAA	MVLNLENVNCVTLQDEELMMVNGGLAPIVIGGVVVGWKVIGGVAGVIAASGAAGIAAGYYANRP*	MVLNLENVNCVTLQDEELMMVNGG	LAPIVIGGVVVGWKVIGGVAGVIAASGAAGIAAGYYANRP*	24	41	1.2225	3734.1	10.0086	1.99825
84-12 S20	2769008	2769196	189	ATGGTGACATTTATGTCACTATTTTTTGT	TTGAATTTAGAAAATGTAAACTGTGTTACTCTTCAAGATGAAGAATTGATGATGGTTAACGGAGGTCTTGCACCGATTGTAATTGGTGGAGTTGTCGTAGGTTGGAAGGTCATTGGTGGCGTTGCAGGTGTTATAGCAGCAAGTGGTGCTGCAGGGATTGCAGCAGGTTATTATGCTAATCGTCCTTAA	LNLENVNCVTLQDEELMMVNGGLAPIVIGGVVVGWKVIGGVAGVIAASGAAGIAAGYYANRP*	LNLENVNCVTLQDEELMMVNGG	LAPIVIGGVVVGWKVIGGVAGVIAASGAAGIAAGYYANRP*	22	41	1.2225	3734.1	10.0086	1.99825
84-12 S20	2769416	2769571	156	ATGGTGACATTTATGTCACTATTTTTTGT	ATGTCTAAAAAATATGAGTTGAGTAAAAAAGAATTACAGGAAATTCAAGGAGGTGTTGCACCAATTATGGTTGCTATTGGTTTAGGAAGTCTAGCAGTAGCATCATTTAGTTCAGGATATAAATTTGGAACAGATTTAGCTAGACGTGGACGATAG	MSKKYELSKKELQEIQGGVAPIMVAIGLGSLAVASFSSGYKFGTDLARRGR*	MSKKYELSKKELQEIQGG	VAPIMVAIGLGSLAVASFSSGYKFGTDLARRGR*	18	34	0.6	3366.82	11.4308	2.99983
84-12 S20	2869027	2869227	201	ATAGTGACATTTATGTCACTATTTTTTAT	TTGAAAACATCAGAAATGACACAACAAGTATTGACACATCAGGAATTATCAGTGGTTGTAGGTGGTGGATGTAGTTGGAACAATGCAGCTAAGGCAGCCCTCGGAACAAGTATCACGGGTCTTATCACTAGTGGCCCAGGAGGAGCTTTATTGGGATTAGCTGGAGGAGCAGTAAGTTACGGAGCGTTGTGTTGGGTATGA	LKTSEMTQQVLTHQELSVVVGGGCSWNNAAKAALGTSITGLITSGPGGALLGLAGGAVSYGALCWV*	LKTSEMTQQVLTHQELSVVVGG	GCSWNNAAKAALGTSITGLITSGPGGALLGLAGGAVSYGALCWV*	22	45	0.788636	4105.08	8.22118	0.937741
84-12 S20	2869042	2869227	186	ATAGTGACATTTATGTCACTATTTTTTAT	ATGACACAACAAGTATTGACACATCAGGAATTATCAGTGGTTGTAGGTGGTGGATGTAGTTGGAACAATGCAGCTAAGGCAGCCCTCGGAACAAGTATCACGGGTCTTATCACTAGTGGCCCAGGAGGAGCTTTATTGGGATTAGCTGGAGGAGCAGTAAGTTACGGAGCGTTGTGTTGGGTATGA	MTQQVLTHQELSVVVGGGCSWNNAAKAALGTSITGLITSGPGGALLGLAGGAVSYGALCWV*	MTQQVLTHQELSVVVGG	GCSWNNAAKAALGTSITGLITSGPGGALLGLAGGAVSYGALCWV*	17	45	0.788636	4105.08	8.22118	0.937741
84-12 S20	2880407	2880556	150	ATAGTGACATTTATGTCACTATTTTTTTG	ATGCGAACTAAGGCGTATGGTGAAGAGCTCAATGCTGACACCTTAGAAAATGTTACAGGGGGTGGTTTTGTATCTAAACCTCAAACCTTACCTGAACGATTGGGTTGGAACAAATGGTGGTTGAAAAGAAGACCTCCTTATGGCGATTAG	MRTKAYGEELNADTLENVTGGGFVSKPQTLPERLGWNKWWLKRRPPYGD*	MRTKAYGEELNADTLENVTGG	GFVSKPQTLPERLGWNKWWLKRRPPYGD*	21	29	-1.21071	3410.82	11.0904	4.00077
85-02 S21	1838952	1839188	237	GTAGTGACATAAATGTCACTATTTTTTTG	ATGACAACACAAATCATTAACAATTTTAATTCACTTAAATCCGAAGATCTTTCTATTATCGAAGGTGGTGGTGTGATTGGTTGTGTAGCTGGGACCGCTGAATCTGCTGGACTTGGATTTTTGACTGGAACATCAGTTGGAACTGTTACATTTCCAATTGTTGGGACTGTTTCAGGTGGAGCATTTGGGGCATGGTCAGGAGCCGGCCTTGGAATGGCTACATTTTGCGGAGTTTAG	MTTQIINNFNSLKSEDLSIIEGGGVIGCVAGTAESAGLGFLTGTSVGTVTFPIVGTVSGGAFGAWSGAGLGMATFCGV*	MTTQIINNFNSLKSEDLSIIEGG	GVIGCVAGTAESAGLGFLTGTSVGTVTFPIVGTVSGGAFGAWSGAGLGMATFCGV*	23	56	1.09818	5022.46	3.84995	-1.06005
85-02 S21	1847568	1847795	228	GTGGTGACATTCATGTCACTACTTTTTTG	ATGACAACACAAACAATTAACACTTTTGAAACACTCGATTTCGAGGCACTTGCAAACGTTGAAGGTGGAAAAGTCAATTGGGACCGTTTATCTAGTAGCGCTAGTGGTGCTGCTGAGGGAATTTATTTCTGTGCCGCATCAGGTGCTCCACTCTTTACGCTTGCACCTTATGCTATTGTAGGGTGTGGAGTTGTCGGAGCTGGTCTTGGTTATGCTTTCCCACATTAA	MTTQTINTFETLDFEALANVEGGKVNWDRLSSSASGAAEGIYFCAASGAPLFTLAPYAIVGCGVVGAGLGYAFPH*	MTTQTINTFETLDFEALANVEGG	KVNWDRLSSSASGAAEGIYFCAASGAPLFTLAPYAIVGCGVVGAGLGYAFPH*	23	53	0.630769	5188.56	7.24779	0.178455
85-02 S21	2311279	2311446	168	ATGGTGACATTCATGTCACTACTTTTTTA	ATGACTGAGACAATTAACAATCGTAAAAATATGACTACTCAAGAGCTTGAAGCTGTATCAGGTGGAGTGATTCCTTGGGCCGCTATTTCTGTAGGCATTGCTGCTGCAAAACTGACTTATGACCTTAGCTATGCTGCAGGTAAGTCTTTCTATAACCTCACCCACTAA	MTETINNRKNMTTQELEAVSGGVIPWAAISVGIAAAKLTYDLSYAAGKSFYNLTH*	MTETINNRKNMTTQELEAVSGG	VIPWAAISVGIAAAKLTYDLSYAAGKSFYNLTH*	22	34	0.59697	3510.86	9.03496	1.23835
85-02 S21	2311095	2311259	165	ATGGTGACATTCATGTCACTACTTTTTTA	ATGACAATGATTAACAAAGAAATGAAGGTAGCTGAGCTAGCTTCAGTAACAGGAGGCGGATGGAAGACCAACCTCGCCATTGGAGGGCTCTGCCTAGCTTCAGGACCTATTGGAACTATGGTGTGCCTTGGAGCCTACAATGGCTACATGGATTCTGCACGATAA	MTMINKEMKVAELASVTGGGWKTNLAIGGLCLASGPIGTMVCLGAYNGYMDSAR*	MTMINKEMKVAELASVTGG	GWKTNLAIGGLCLASGPIGTMVCLGAYNGYMDSAR*	19	36	0.417143	3559.71	8.21289	0.937738
85-02 S21	2311101	2311259	159	ATGGTGACATTCATGTCACTACTTTTTTA	ATGATTAACAAAGAAATGAAGGTAGCTGAGCTAGCTTCAGTAACAGGAGGCGGATGGAAGACCAACCTCGCCATTGGAGGGCTCTGCCTAGCTTCAGGACCTATTGGAACTATGGTGTGCCTTGGAGCCTACAATGGCTACATGGATTCTGCACGATAA	MINKEMKVAELASVTGGGWKTNLAIGGLCLASGPIGTMVCLGAYNGYMDSAR*	MINKEMKVAELASVTGG	GWKTNLAIGGLCLASGPIGTMVCLGAYNGYMDSAR*	17	36	0.417143	3559.71	8.21289	0.937738
85-02 S21	1161193	1161342	150	GTAGTGACATTTATGTCACTATTTTTTTG	ATGCGAACTAAGGTATATGGTGAAGAGCTCAATGCTGAAACCTTAGAAAATGTTACAGGGGGTGGTTTTGTATCTAAACCTCAAACCTTACCTGAACGATTGGGTTGGAACAAATGGTGGTTGAAAAGAAGACCTCCTTATGGCGATTAG	MRTKVYGEELNAETLENVTGGGFVSKPQTLPERLGWNKWWLKRRPPYGD*	MRTKVYGEELNAETLENVTGG	GFVSKPQTLPERLGWNKWWLKRRPPYGD*	21	29	-1.21071	3410.82	11.0904	4.00077
85-04 S22	1460609	1460776	168	ATGGTGACATTCATGTCACTACTTTTTTA	ATGACTGAGACAATTAACAATCGTAAAAATATGACTACTCAAGAGCTTGAAGCTGTATCAGGTGGAGTGATTCCTTGGGCCGCTATTTCTGTAGGCATTGCTGCTGCAAAACTGACTTATGACCTTAGCTATGCTGCAGGTAAGTCTTTCTATAACCTCACCCACTAA	MTETINNRKNMTTQELEAVSGGVIPWAAISVGIAAAKLTYDLSYAAGKSFYNLTH*	MTETINNRKNMTTQELEAVSGG	VIPWAAISVGIAAAKLTYDLSYAAGKSFYNLTH*	22	34	0.59697	3510.86	9.03496	1.23835
85-04 S22	1460425	1460589	165	ATGGTGACATTCATGTCACTACTTTTTTA	ATGACAATGATTAACAAAGAAATGAAGGTAGCTGAGCTAGCTTCAGTAACAGGAGGCGGATGGAAGACCAACCTCGCCATTGGAGGGCTCTGCCTAGCTTCAGGACCTATTGGAACTATGGTGTGCCTTGGAGCCTACAATGGCTACATGGATTCTGCACGATAA	MTMINKEMKVAELASVTGGGWKTNLAIGGLCLASGPIGTMVCLGAYNGYMDSAR*	MTMINKEMKVAELASVTGG	GWKTNLAIGGLCLASGPIGTMVCLGAYNGYMDSAR*	19	36	0.417143	3559.71	8.21289	0.937738
85-04 S22	1460431	1460589	159	ATGGTGACATTCATGTCACTACTTTTTTA	ATGATTAACAAAGAAATGAAGGTAGCTGAGCTAGCTTCAGTAACAGGAGGCGGATGGAAGACCAACCTCGCCATTGGAGGGCTCTGCCTAGCTTCAGGACCTATTGGAACTATGGTGTGCCTTGGAGCCTACAATGGCTACATGGATTCTGCACGATAA	MINKEMKVAELASVTGGGWKTNLAIGGLCLASGPIGTMVCLGAYNGYMDSAR*	MINKEMKVAELASVTGG	GWKTNLAIGGLCLASGPIGTMVCLGAYNGYMDSAR*	17	36	0.417143	3559.71	8.21289	0.937738
85-04 S22	2020533	2020682	150	GTAGTGACATTTATGTCACTATTTTTTTG	ATGCGAACTAAGGTATATGGTGAAGAGCTCAATGCTGAAACCTTAGAAAATGTTACAGGGGGTGGTTTTGTATCTAAACCTCAAACCTTACCTGAACGATTGGGTTGGAACAAATGGTGGTTGAAAAGAAGACCTCCTTATGGCGATTAG	MRTKVYGEELNAETLENVTGGGFVSKPQTLPERLGWNKWWLKRRPPYGD*	MRTKVYGEELNAETLENVTGG	GFVSKPQTLPERLGWNKWWLKRRPPYGD*	21	29	-1.21071	3410.82	11.0904	4.00077
85-04 S22	2084508	2084744	237	GTAGTGACATAAATGTCACTATTTTTTTG	ATGACAACACAAATCATTAACAATTTTAATTCACTTAAATCCGAAGATCTTTCTATTATCGAAGGTGGTGGTGTGATTGGTTGTGTAGCTGGGACCGCTGAATCTGCTGGACTTGGATTTTTGACTGGAACATCAGTTGGAACTGTTACATTTCCAATTGTTGGGACTGTTTCAGGTGGAGCATTTGGGGCATGGTCAGGAGCCGGCCTTGGAATGGCTACATTTTGCGGAGTTTAG	MTTQIINNFNSLKSEDLSIIEGGGVIGCVAGTAESAGLGFLTGTSVGTVTFPIVGTVSGGAFGAWSGAGLGMATFCGV*	MTTQIINNFNSLKSEDLSIIEGG	GVIGCVAGTAESAGLGFLTGTSVGTVTFPIVGTVSGGAFGAWSGAGLGMATFCGV*	23	56	1.09818	5022.46	3.84995	-1.06005
85-04 S22	2093124	2093351	228	GTGGTGACATTCATGTCACTACTTTTTTG	ATGACAACACAAACAATTAACACTTTTGAAACACTCGATTTCGAGGCACTTGCAAACGTTGAAGGTGGAAAAGTCAATTGGGACCGTTTATCTAGTAGCGCTAGTGGTGCTGCTGAGGGAATTTATTTCTGTGCCGCATCAGGTGCTCCACTCTTTACGCTTGCACCTTATGCTATTGTAGGGTGTGGAGTTGTCGGAGCTGGTCTTGGTTATGCTTTCCCACATTAA	MTTQTINTFETLDFEALANVEGGKVNWDRLSSSASGAAEGIYFCAASGAPLFTLAPYAIVGCGVVGAGLGYAFPH*	MTTQTINTFETLDFEALANVEGG	KVNWDRLSSSASGAAEGIYFCAASGAPLFTLAPYAIVGCGVVGAGLGYAFPH*	23	53	0.630769	5188.56	7.24779	0.178455
85-05 S23	63159	63308	150	GTAGTGACATTTATGTCACTATTTTTTTG	ATGCGAACTAAGGTATATGGTGAAGAGCTCAATGCTGAAACCTTAGAAAATGTTACAGGGGGTGGTTTTGTATCTAAACCTCAAACCTTACCTGAACGATTGGGTTGGAACAAATGGTGGTTGAAAAGAAGACCTCCTTATGGCGATTAG	MRTKVYGEELNAETLENVTGGGFVSKPQTLPERLGWNKWWLKRRPPYGD*	MRTKVYGEELNAETLENVTGG	GFVSKPQTLPERLGWNKWWLKRRPPYGD*	21	29	-1.21071	3410.82	11.0904	4.00077
85-05 S23	127134	127370	237	GTAGTGACATAAATGTCACTATTTTTTTG	ATGACAACACAAATCATTAACAATTTTAATTCACTTAAATCCGAAGATCTTTCTATTATCGAAGGTGGTGGTGTGATTGGTTGTGTAGCTGGGACCGCTGAATCTGCTGGACTTGGATTTTTGACTGGAACATCAGTTGGAACTGTTACATTTCCAATTGTTGGGACTGTTTCAGGTGGAGCATTTGGGGCATGGTCAGGAGCCGGCCTTGGAATGGCTACATTTTGCGGAGTTTAG	MTTQIINNFNSLKSEDLSIIEGGGVIGCVAGTAESAGLGFLTGTSVGTVTFPIVGTVSGGAFGAWSGAGLGMATFCGV*	MTTQIINNFNSLKSEDLSIIEGG	GVIGCVAGTAESAGLGFLTGTSVGTVTFPIVGTVSGGAFGAWSGAGLGMATFCGV*	23	56	1.09818	5022.46	3.84995	-1.06005
85-05 S23	135750	135977	228	GTGGTGACATTCATGTCACTACTTTTTTG	ATGACAACACAAACAATTAACACTTTTGAAACACTCGATTTCGAGGCACTTGCAAACGTTGAAGGTGGAAAAGTCAATTGGGACCGTTTATCTAGTAGCGCTAGTGGTGCTGCTGAGGGAATTTATTTCTGTGCCGCATCAGGTGCTCCACTCTTTACGCTTGCACCTTATGCTATTGTAGGGTGTGGAGTTGTCGGAGCTGGTCTTGGTTATGCTTTCCCACATTAA	MTTQTINTFETLDFEALANVEGGKVNWDRLSSSASGAAEGIYFCAASGAPLFTLAPYAIVGCGVVGAGLGYAFPH*	MTTQTINTFETLDFEALANVEGG	KVNWDRLSSSASGAAEGIYFCAASGAPLFTLAPYAIVGCGVVGAGLGYAFPH*	23	53	0.630769	5188.56	7.24779	0.178455
85-05 S23	1126469	1126636	168	ATGGTGACATTCATGTCACTACTTTTTTA	ATGACTGAGACAATTAACAATCGTAAAAATATGACTACTCAAGAGCTTGAAGCTGTATCAGGTGGAGTGATTCCTTGGGCCGCTATTTCTGTAGGCATTGCTGCTGCAAAACTGACTTATGACCTTAGCTATGCTGCAGGTAAGTCTTTCTATAACCTCACCCACTAA	MTETINNRKNMTTQELEAVSGGVIPWAAISVGIAAAKLTYDLSYAAGKSFYNLTH*	MTETINNRKNMTTQELEAVSGG	VIPWAAISVGIAAAKLTYDLSYAAGKSFYNLTH*	22	34	0.59697	3510.86	9.03496	1.23835
85-05 S23	1126285	1126449	165	ATGGTGACATTCATGTCACTACTTTTTTA	ATGACAATGATTAACAAAGAAATGAAGGTAGCTGAGCTAGCTTCAGTAACAGGAGGCGGATGGAAGACCAACCTCGCCATTGGAGGGCTCTGCCTAGCTTCAGGACCTATTGGAACTATGGTGTGCCTTGGAGCCTACAATGGCTACATGGATTCTGCACGATAA	MTMINKEMKVAELASVTGGGWKTNLAIGGLCLASGPIGTMVCLGAYNGYMDSAR*	MTMINKEMKVAELASVTGG	GWKTNLAIGGLCLASGPIGTMVCLGAYNGYMDSAR*	19	36	0.417143	3559.71	8.21289	0.937738
85-05 S23	1126291	1126449	159	ATGGTGACATTCATGTCACTACTTTTTTA	ATGATTAACAAAGAAATGAAGGTAGCTGAGCTAGCTTCAGTAACAGGAGGCGGATGGAAGACCAACCTCGCCATTGGAGGGCTCTGCCTAGCTTCAGGACCTATTGGAACTATGGTGTGCCTTGGAGCCTACAATGGCTACATGGATTCTGCACGATAA	MINKEMKVAELASVTGGGWKTNLAIGGLCLASGPIGTMVCLGAYNGYMDSAR*	MINKEMKVAELASVTGG	GWKTNLAIGGLCLASGPIGTMVCLGAYNGYMDSAR*	17	36	0.417143	3559.71	8.21289	0.937738
85-06 S24	1795222	1795371	150	GTAGTGACATTTATGTCACTATTTTTTTG	ATGCGAACTAAGGTATATGGTGAAGAGCTCAATGCTGAAACCTTAGAAAATGTTACAGGGGGTGGTTTTGTATCTAAACCTCAAACCTTACCTGAACGATTGGGTTGGAACAAATGGTGGTTGAAAAGAAGACCTCCTTATGGCGATTAG	MRTKVYGEELNAETLENVTGGGFVSKPQTLPERLGWNKWWLKRRPPYGD*	MRTKVYGEELNAETLENVTGG	GFVSKPQTLPERLGWNKWWLKRRPPYGD*	21	29	-1.21071	3410.82	11.0904	4.00077
85-06 S24	1859196	1859432	237	GTAGTGACATAAATGTCACTATTTTTTTG	ATGACAACACAAATCATTAACAATTTTAATTCACTTAAATCCGAAGATCTTTCTATTATCGAAGGTGGTGGTGTGATTGGTTGTGTAGCTGGGACCGCTGAATCTGCTGGACTTGGATTTTTGACTGGAACATCAGTTGGAACTGTTACATTTCCAATTGTTGGGACTGTTTCAGGTGGAGCATTTGGGGCATGGTCAGGAGCCGGCCTTGGAATGGCTACATTTTGCGGAGTTTAG	MTTQIINNFNSLKSEDLSIIEGGGVIGCVAGTAESAGLGFLTGTSVGTVTFPIVGTVSGGAFGAWSGAGLGMATFCGV*	MTTQIINNFNSLKSEDLSIIEGG	GVIGCVAGTAESAGLGFLTGTSVGTVTFPIVGTVSGGAFGAWSGAGLGMATFCGV*	23	56	1.09818	5022.46	3.84995	-1.06005
85-06 S24	1867812	1868039	228	GTGGTGACATTCATGTCACTACTTTTTTG	ATGACAACACAAACAATTAACACTTTTGAAACACTCGATTTCGAGGCACTTGCAAACGTTGAAGGTGGAAAAGTCAATTGGGACCGTTTATCTAGTAGCGCTAGTGGTGCTGCTGAGGGAATTTATTTCTGTGCCGCATCAGGTGCTCCACTCTTTACGCTTGCACCTTATGCTATTGTAGGGTGTGGAGTTGTCGGAGCTGGTCTTGGTTATGCTTTCCCACATTAA	MTTQTINTFETLDFEALANVEGGKVNWDRLSSSASGAAEGIYFCAASGAPLFTLAPYAIVGCGVVGAGLGYAFPH*	MTTQTINTFETLDFEALANVEGG	KVNWDRLSSSASGAAEGIYFCAASGAPLFTLAPYAIVGCGVVGAGLGYAFPH*	23	53	0.630769	5188.56	7.24779	0.178455
85-06 S24	2161485	2161652	168	ATGGTGACATTCATGTCACTACTTTTTTA	ATGACTGAGACAATTAACAATCGTAAAAATATGACTACTCAAGAGCTTGAAGCTGTATCAGGTGGAGTGATTCCTTGGGCCGCTATTTCTGTAGGCATTGCTGCTGCAAAACTGACTTATGACCTTAGCTATGCTGCAGGTAAGTCTTTCTATAACCTCACCCACTAA	MTETINNRKNMTTQELEAVSGGVIPWAAISVGIAAAKLTYDLSYAAGKSFYNLTH*	MTETINNRKNMTTQELEAVSGG	VIPWAAISVGIAAAKLTYDLSYAAGKSFYNLTH*	22	34	0.59697	3510.86	9.03496	1.23835
85-06 S24	2161301	2161465	165	ATGGTGACATTCATGTCACTACTTTTTTA	ATGACAATGATTAACAAAGAAATGAAGGTAGCTGAGCTAGCTTCAGTAACAGGAGGCGGATGGAAGACCAACCTCGCCATTGGAGGGCTCTGCCTAGCTTCAGGACCTATTGGAACTATGGTGTGCCTTGGAGCCTACAATGGCTACATGGATTCTGCACGATAA	MTMINKEMKVAELASVTGGGWKTNLAIGGLCLASGPIGTMVCLGAYNGYMDSAR*	MTMINKEMKVAELASVTGG	GWKTNLAIGGLCLASGPIGTMVCLGAYNGYMDSAR*	19	36	0.417143	3559.71	8.21289	0.937738
85-06 S24	2161307	2161465	159	ATGGTGACATTCATGTCACTACTTTTTTA	ATGATTAACAAAGAAATGAAGGTAGCTGAGCTAGCTTCAGTAACAGGAGGCGGATGGAAGACCAACCTCGCCATTGGAGGGCTCTGCCTAGCTTCAGGACCTATTGGAACTATGGTGTGCCTTGGAGCCTACAATGGCTACATGGATTCTGCACGATAA	MINKEMKVAELASVTGGGWKTNLAIGGLCLASGPIGTMVCLGAYNGYMDSAR*	MINKEMKVAELASVTGG	GWKTNLAIGGLCLASGPIGTMVCLGAYNGYMDSAR*	17	36	0.417143	3559.71	8.21289	0.937738
AF10-23	93732	93899	168	ATGGTGACATTTATGTCACTACTTTTTTA	ATGACTAAGACCATTAACAATCGTAAAAACATGACTACTCAAGAACTTGAAGCTGTATCAGGTGGAGTAGTTCCTTGGGCCGCTATTTCTGTTGGCATCGCTGCTGCAAAACTGACTTATGACCTTAGCTATGCTGCAGGTAAGTCTTTCTATAACCTCACCCACTAA	MTKTINNRKNMTTQELEAVSGGVVPWAAISVGIAAAKLTYDLSYAAGKSFYNLTH*	MTKTINNRKNMTTQELEAVSGG	VVPWAAISVGIAAAKLTYDLSYAAGKSFYNLTH*	22	34	0.587879	3496.84	9.03496	1.23835
AF10-23	93548	93712	165	ATGGTGACATTTATGTCACTACTTTTTTA	ATGACAATGATTAACAAAGAAATGAAGGCAGCTGACCTAGCCTCAGTAACAGGAGGCGGATGGAAGACTAACCTTGCCATTGGAGGGCTCTGCCTAGCTTCAGGACCTATTGGAACTATGGTATGCCTTGGAGCCTACAATGGCTACATGGACTCTGCGCGATAA	MTMINKEMKAADLASVTGGGWKTNLAIGGLCLASGPIGTMVCLGAYNGYMDSAR*	MTMINKEMKAADLASVTGG	GWKTNLAIGGLCLASGPIGTMVCLGAYNGYMDSAR*	19	36	0.417143	3559.71	8.21289	0.937738
AF10-23	93554	93712	159	ATGGTGACATTTATGTCACTACTTTTTTA	ATGATTAACAAAGAAATGAAGGCAGCTGACCTAGCCTCAGTAACAGGAGGCGGATGGAAGACTAACCTTGCCATTGGAGGGCTCTGCCTAGCTTCAGGACCTATTGGAACTATGGTATGCCTTGGAGCCTACAATGGCTACATGGACTCTGCGCGATAA	MINKEMKAADLASVTGGGWKTNLAIGGLCLASGPIGTMVCLGAYNGYMDSAR*	MINKEMKAADLASVTGG	GWKTNLAIGGLCLASGPIGTMVCLGAYNGYMDSAR*	17	36	0.417143	3559.71	8.21289	0.937738
AF10-23	1515924	1516154	231	GTAGTGACATTTATGTCACTACTTTTTTG	ATGACAACACAAATCATTAACAATTTTAACTCACTTAATTCCGAAGATCTTTCTACTGTTAAGGGTGGAGCATGTAGTTTTTGGGGAGCTACAGCTGCCGTAGGCGTCGGGGCTGTTGGAGGAGCCATTAAAGGTGGTATTCAAACAGGCACTTGGCAAGGTGCAGCCTTAAAGGGTATTGGTTATGGTATTAAAGGTGGGATTACTTATGGCCTTACTTGTCGTTATTAG	MTTQIINNFNSLNSEDLSTVKGGACSFWGATAAVGVGAVGGAIKGGIQTGTWQGAALKGIGYGIKGGITYGLTCRY*	MTTQIINNFNSLNSEDLSTVKGG	ACSFWGATAAVGVGAVGGAIKGGIQTGTWQGAALKGIGYGIKGGITYGLTCRY*	23	54	0.484906	5133.63	9.74961	3.93583
AF10-23	1524528	1524758	231	GTGGTGACATTTATGTCACTACTTTTTTG	ATGACAACACAAACAATGAACACTTTTGAAACACTCGATCTCGAGGCACTTGCAAACGTTGAAGGTGGTGGATGTAGCTGGGGAGGTTTTGCTAAACAAGGAGTAGCTACAGGAGTTGGTAATGGTTTACGATTAGGTATCAAAACACGTACTTGGCAAGGTGCTGTCGCAGGAGCAGCTGGAGGTGCTATCGTAGGGGGTGTTGGTTATGGAGCAACATGCTGGTGGTGA	MTTQTMNTFETLDLEALANVEGGGCSWGGFAKQGVATGVGNGLRLGIKTRTWQGAVAGAAGGAIVGGVGYGATCWW*	MTTQTMNTFETLDLEALANVEGG	GCSWGGFAKQGVATGVGNGLRLGIKTRTWQGAVAGAAGGAIVGGVGYGATCWW*	23	54	0.332075	5136.57	10.2636	3.93758
AF10-23	1524543	1524758	216	GTGGTGACATTTATGTCACTACTTTTTTG	ATGAACACTTTTGAAACACTCGATCTCGAGGCACTTGCAAACGTTGAAGGTGGTGGATGTAGCTGGGGAGGTTTTGCTAAACAAGGAGTAGCTACAGGAGTTGGTAATGGTTTACGATTAGGTATCAAAACACGTACTTGGCAAGGTGCTGTCGCAGGAGCAGCTGGAGGTGCTATCGTAGGGGGTGTTGGTTATGGAGCAACATGCTGGTGGTGA	MNTFETLDLEALANVEGGGCSWGGFAKQGVATGVGNGLRLGIKTRTWQGAVAGAAGGAIVGGVGYGATCWW*	MNTFETLDLEALANVEGG	GCSWGGFAKQGVATGVGNGLRLGIKTRTWQGAVAGAAGGAIVGGVGYGATCWW*	18	54	0.332075	5136.57	10.2636	3.93758
AF10-23	2091678	2091827	150	ATAGTGACATTTATGTCACTATTTTTTTG	ATGCGAACTAAGGTATATGGCGAAGAGCTCACTGCTGAAACGTTAGAAAATGTCACAGGGGGTGATTTTGTATCTAGACCTCAAACCTTACCTGAACGATTGGGTTGGAACAAATGGTGGTTGAAAAGAAAATACCCTTATGGTGATTAA	MRTKVYGEELTAETLENVTGGDFVSRPQTLPERLGWNKWWLKRKYPYGD*	MRTKVYGEELTAETLENVTGG	DFVSRPQTLPERLGWNKWWLKRKYPYGD*	21	29	-1.31071	3534.83	10.3219	3.00077
AF23-9AC	1732362	1732529	168	ATGGTGACATTTATGTCACTACTTTTTTA	ATGACTAAGACCATTAACAATCGTAAAAACATGACTACTCAAGAACTTGAAGCTGTATCAGGTGGAGTGGTTCCTTGGGCCGCTATTTCTGTTGGCATGGCTGCTGCAAAACTAACTTATGATCTTAGCTATGCCGCAGGTAAATCTTTCTATAACCTCACTCACTAA	MTKTINNRKNMTTQELEAVSGGVVPWAAISVGMAAAKLTYDLSYAAGKSFYNLTH*	MTKTINNRKNMTTQELEAVSGG	VVPWAAISVGMAAAKLTYDLSYAAGKSFYNLTH*	22	34	0.509091	3514.8	9.03496	1.23835
AF23-9AC	1732177	1732341	165	ATGGTGACATTTATGTCACTACTTTTTTA	ATGACAATGATTAACAAGGAAATGAAGGCAGCTGAGCTAGCCTCAGTAACAGGAGGCGGATGGAAGACCAACCTCGCCATTGGAGGACTCTGCCTAGCTTCAGGACCTATTGGAACTATGGTATGCCTTGGAGCCTACAATGGCTACATGGACTCTGCACGATGA	MTMINKEMKAAELASVTGGGWKTNLAIGGLCLASGPIGTMVCLGAYNGYMDSAR*	MTMINKEMKAAELASVTGG	GWKTNLAIGGLCLASGPIGTMVCLGAYNGYMDSAR*	19	36	0.417143	3559.71	8.21289	0.937738
AF23-9AC	1732183	1732341	159	ATGGTGACATTTATGTCACTACTTTTTTA	ATGATTAACAAGGAAATGAAGGCAGCTGAGCTAGCCTCAGTAACAGGAGGCGGATGGAAGACCAACCTCGCCATTGGAGGACTCTGCCTAGCTTCAGGACCTATTGGAACTATGGTATGCCTTGGAGCCTACAATGGCTACATGGACTCTGCACGATGA	MINKEMKAAELASVTGGGWKTNLAIGGLCLASGPIGTMVCLGAYNGYMDSAR*	MINKEMKAAELASVTGG	GWKTNLAIGGLCLASGPIGTMVCLGAYNGYMDSAR*	17	36	0.417143	3559.71	8.21289	0.937738
AF23-9AC	1884898	1885047	150	ATAGTGACATTTATGTCACTATTTTTTTG	ATGCGAACTAAGGTATATGGCGAAGAGCTCACTGCTGAAACGTTAGAAAATGTCACAGGGGGTGATTTTGTATCTAGACCTCAAACCTTATCTGAACGATTGGGTTGGAACAAATGGTGGTTGAAAAGAAAATACCCTTATGGTGATTAA	MRTKVYGEELTAETLENVTGGDFVSRPQTLSERLGWNKWWLKRKYPYGD*	MRTKVYGEELTAETLENVTGG	DFVSRPQTLSERLGWNKWWLKRKYPYGD*	21	29	-1.28214	3524.81	10.3219	3.00077
AF23-9AC	1951234	1951464	231	GTAGTGACATTTATGTCACTACTTTTTTG	ATGACAACACAAATCATTAACAATTTTAACTCACTTAATTCCGAAGATCTTTCTACTGTTAAGGGTGGAGCATGTAGTTTTTGGGGAGCTACAGCTGCCGTAGGCGTCGGGGCTGTTGGAGGAGCCATTAAAGGTGGTATTCAAACAGGTACTTGGCAAGGTGCAGCCTTAAAGGGTATTGGTTATGGTATTAAAGATGGGATTACTTATGGCCTTATTTGTCGTTATTAG	MTTQIINNFNSLNSEDLSTVKGGACSFWGATAAVGVGAVGGAIKGGIQTGTWQGAALKGIGYGIKDGITYGLICRY*	MTTQIINNFNSLNSEDLSTVKGG	ACSFWGATAAVGVGAVGGAIKGGIQTGTWQGAALKGIGYGIKDGITYGLICRY*	23	54	0.524528	5203.67	9.26645	2.93663
AF23-9AC	1959840	1960019	180	GTGGTGACATACATGTCACTACTTTTTTG	ATGACAACACAAACAATGAACAATTTTGAAACACTCAATCTCGAGACACTTGCAAACGTTGAAGGTGGCGGATGGGTTAAGTGTTATGCCGGCACAATTGGCTCTGCTCTAGTAGGATCAGCAGGAGGCCCAGTAGGTTACTGGGGAGGAGCTTTAGTTGGTTACGCTACATTCTGCTAA	MTTQTMNNFETLNLETLANVEGGGWVKCYAGTIGSALVGSAGGPVGYWGGALVGYATFC*	MTTQTMNNFETLNLETLANVEGG	GWVKCYAGTIGSALVGSAGGPVGYWGGALVGYATFC*	23	37	0.763889	3494.68	8.2049	0.936154
AF23-9AC	1959855	1960019	165	GTGGTGACATACATGTCACTACTTTTTTG	ATGAACAATTTTGAAACACTCAATCTCGAGACACTTGCAAACGTTGAAGGTGGCGGATGGGTTAAGTGTTATGCCGGCACAATTGGCTCTGCTCTAGTAGGATCAGCAGGAGGCCCAGTAGGTTACTGGGGAGGAGCTTTAGTTGGTTACGCTACATTCTGCTAA	MNNFETLNLETLANVEGGGWVKCYAGTIGSALVGSAGGPVGYWGGALVGYATFC*	MNNFETLNLETLANVEGG	GWVKCYAGTIGSALVGSAGGPVGYWGGALVGYATFC*	18	37	0.763889	3494.68	8.2049	0.936154
AF29-16	2395123	2395290	168	ATGGTGACATTTATGTCACTACTTTTTTA	ATGACTAAGACCATTAACAATCGTAAAAACATGACTACTCAAGAACTTGAAACTGTATCAGGTGGAGTGGTTCCTTGGGCCGCTATTTCTGTTGGCATTGCTGCTGCAAAACTGACTTATGACCTTAGCTATGCTGCAGGTAAGTCTTTCTATAACCTCACCCACTAA	MTKTINNRKNMTTQELETVSGGVVPWAAISVGIAAAKLTYDLSYAAGKSFYNLTH*	MTKTINNRKNMTTQELETVSGG	VVPWAAISVGIAAAKLTYDLSYAAGKSFYNLTH*	22	34	0.587879	3496.84	9.03496	1.23835
AF29-16	2394939	2395103	165	ATGGTGACATTTATGTCACTACTTTTTTA	ATGACAATGATTAACAAAGAAATGAAGGCAGCTGACCTAGCCTCAGTAACAGGAGGCGGATGGAAGACTAACCTTGCCATTGGAGGGCTCTGCCTAGCTTCAGGACCTATTGGAACTATGGTATGCCTTGGAGCCTACAATGGCTACATGGACTCTGCGAGATAA	MTMINKEMKAADLASVTGGGWKTNLAIGGLCLASGPIGTMVCLGAYNGYMDSAR*	MTMINKEMKAADLASVTGG	GWKTNLAIGGLCLASGPIGTMVCLGAYNGYMDSAR*	19	36	0.417143	3559.71	8.21289	0.937738
AF29-16	2394945	2395103	159	ATGGTGACATTTATGTCACTACTTTTTTA	ATGATTAACAAAGAAATGAAGGCAGCTGACCTAGCCTCAGTAACAGGAGGCGGATGGAAGACTAACCTTGCCATTGGAGGGCTCTGCCTAGCTTCAGGACCTATTGGAACTATGGTATGCCTTGGAGCCTACAATGGCTACATGGACTCTGCGAGATAA	MINKEMKAADLASVTGGGWKTNLAIGGLCLASGPIGTMVCLGAYNGYMDSAR*	MINKEMKAADLASVTGG	GWKTNLAIGGLCLASGPIGTMVCLGAYNGYMDSAR*	17	36	0.417143	3559.71	8.21289	0.937738
AF29-16	17721	17870	150	ATAGTGACATTTATGTCACTATTTTTTTG	ATGCGAACTAAGGTATATGGCGAAGAGCTCACTGCTGAAACGTTAGAAAATGTCACAGGGGGTGATTTTGTATCTAGACCTCAAACCTTACCTGAACGATTGGGTTGGAACAAATGGTGGTTGAAAAGAAAATACCCTTATGGTGATTAA	MRTKVYGEELTAETLENVTGGDFVSRPQTLPERLGWNKWWLKRKYPYGD*	MRTKVYGEELTAETLENVTGG	DFVSRPQTLPERLGWNKWWLKRKYPYGD*	21	29	-1.31071	3534.83	10.3219	3.00077
AF29-16	80195	80425	231	GTAGTGACATTTATGTCACTACTTTTTTG	ATGACGACACAAATCATTAACAATTTTAACTCACTTAATTCCGAAGATCTTTCTACTGTTAAGGGTGGAGCATGTAGTTTTTGGGGAGCTACAGCTGCCGTAGGCGTCGGGGCTGTTGGAGGAGCCATTAAAGGTGGTATTCAAACAGGTACTTGGCAAGGTGCAGCCTTAAAGGGTATTGGTTATGGTATTAAAGATGGGATTACTTATGGCCTTATTTGTCGTTATTAG	MTTQIINNFNSLNSEDLSTVKGGACSFWGATAAVGVGAVGGAIKGGIQTGTWQGAALKGIGYGIKDGITYGLICRY*	MTTQIINNFNSLNSEDLSTVKGG	ACSFWGATAAVGVGAVGGAIKGGIQTGTWQGAALKGIGYGIKDGITYGLICRY*	23	54	0.524528	5203.67	9.26645	2.93663
AF29-16	88807	89037	231	GTGGTGACATTTATGTCACTACTTTTTTG	ATGACAACACAAACAATGAACACTTTTGAAACACTCGATCTCGAGGCACTTGCAAACGTTGAAGGTGGTGGATGTAGCTGGGGAGGTTTTGCTAAACAAGGAGTAGCTACAGGAGTTGGTAATGGTTTACGATTAGGTATCAAAACACGTACTTGGCAAGGTGCTGTCGCAGGAGCAGCTGGAGGTGCTATTGTAGGGGGTGTTGGTTATGGAGCAACATGCTGGTGGTGA	MTTQTMNTFETLDLEALANVEGGGCSWGGFAKQGVATGVGNGLRLGIKTRTWQGAVAGAAGGAIVGGVGYGATCWW*	MTTQTMNTFETLDLEALANVEGG	GCSWGGFAKQGVATGVGNGLRLGIKTRTWQGAVAGAAGGAIVGGVGYGATCWW*	23	54	0.332075	5136.57	10.2636	3.93758
AF29-16	88822	89037	216	GTGGTGACATTTATGTCACTACTTTTTTG	ATGAACACTTTTGAAACACTCGATCTCGAGGCACTTGCAAACGTTGAAGGTGGTGGATGTAGCTGGGGAGGTTTTGCTAAACAAGGAGTAGCTACAGGAGTTGGTAATGGTTTACGATTAGGTATCAAAACACGTACTTGGCAAGGTGCTGTCGCAGGAGCAGCTGGAGGTGCTATTGTAGGGGGTGTTGGTTATGGAGCAACATGCTGGTGGTGA	MNTFETLDLEALANVEGGGCSWGGFAKQGVATGVGNGLRLGIKTRTWQGAVAGAAGGAIVGGVGYGATCWW*	MNTFETLDLEALANVEGG	GCSWGGFAKQGVATGVGNGLRLGIKTRTWQGAVAGAAGGAIVGGVGYGATCWW*	18	54	0.332075	5136.57	10.2636	3.93758
ATCC 7073	1320364	1320513	150	ATAGTGACATTTATGTCACTATTTTTTTG	ATGCGAACTAAGGCATATGGCGAAGAGCTCACTGCTGAAACCTTAGAAAATGTCACAGGGGGTGATTTTGTATCTAGACCTCAAACCTTACCTGAACGATTGGGTTGGAACAGATGGTGGTTGAAAAGGAAATACCCTTATGGTGATTAG	MRTKAYGEELTAETLENVTGGDFVSRPQTLPERLGWNRWWLKRKYPYGD*	MRTKAYGEELTAETLENVTGG	DFVSRPQTLPERLGWNRWWLKRKYPYGD*	21	29	-1.33214	3562.84	10.4397	3.00093
ATCC 7073	1384116	1384346	231	GTAGTGACATTTATGTCACTACTTTTTTG	ATGACAACACAAATCATTAACAATTTTAACTCACTTAATTCCGAAGATCTTTCTACTGTTAAGGGTGGAGCATGTAGTTTTTGGGGAGCTACAGCTGCCGTAGGCGTCGGGGCTGTTGGAGGAGCCATTAAAGGTGGTATTCAAACAGGTACTTGGCAAGGTGCAGCCTTAAAGGGTATTGGTTATGGTATTAAAGATGGGATTACTTATGGACTTATTTGTCGTTATTAG	MTTQIINNFNSLNSEDLSTVKGGACSFWGATAAVGVGAVGGAIKGGIQTGTWQGAALKGIGYGIKDGITYGLICRY*	MTTQIINNFNSLNSEDLSTVKGG	ACSFWGATAAVGVGAVGGAIKGGIQTGTWQGAALKGIGYGIKDGITYGLICRY*	23	54	0.524528	5203.67	9.26645	2.93663
ATCC 7073	1392728	1392958	231	GTAGTGACATTTATGTCACTACTTTTTTG	ATGACAACACAAACAATGAACAATTTTGAAACACTCGATCTCGAGGCACTTGCAAACGTTGAAGGTGGCGGATGTAGCTGGGGAGGTTTTGCTAAACAAGGAGTAGCTACAGGAGTTGGTAATGGTTTACGATTAGGTATCAAAACACGTACTTGGCAAGGTGCTGTCGCAGGAGCAGCCGGAGGTGCTATCGTAGGTGGTGTTGGTTATGGAGCAACATGCTGGTGGTGA	MTTQTMNNFETLDLEALANVEGGGCSWGGFAKQGVATGVGNGLRLGIKTRTWQGAVAGAAGGAIVGGVGYGATCWW*	MTTQTMNNFETLDLEALANVEGG	GCSWGGFAKQGVATGVGNGLRLGIKTRTWQGAVAGAAGGAIVGGVGYGATCWW*	23	54	0.332075	5136.57	10.2636	3.93758
ATCC 7073	1392743	1392958	216	GTAGTGACATTTATGTCACTACTTTTTTG	ATGAACAATTTTGAAACACTCGATCTCGAGGCACTTGCAAACGTTGAAGGTGGCGGATGTAGCTGGGGAGGTTTTGCTAAACAAGGAGTAGCTACAGGAGTTGGTAATGGTTTACGATTAGGTATCAAAACACGTACTTGGCAAGGTGCTGTCGCAGGAGCAGCCGGAGGTGCTATCGTAGGTGGTGTTGGTTATGGAGCAACATGCTGGTGGTGA	MNNFETLDLEALANVEGGGCSWGGFAKQGVATGVGNGLRLGIKTRTWQGAVAGAAGGAIVGGVGYGATCWW*	MNNFETLDLEALANVEGG	GCSWGGFAKQGVATGVGNGLRLGIKTRTWQGAVAGAAGGAIVGGVGYGATCWW*	18	54	0.332075	5136.57	10.2636	3.93758
ATCC 7073	1396744	1396902	159	GTAGTGACATTTATGTCACTACTTTTTTG	ATGGGAACTCAAACAATTGAAAACTTTAACACCCTCGACCTTGAAACACTTGCTAGTGTTGAAGGAGGACGAGTCAATTGGGAACGATGGGGAATGTGTGGGGCCTCTGTCGCCGTAGGTGCAACTATTGGAGGTGGAGTAGCCTTACTTGGCTGTTAA	MGTQTIENFNTLDLETLASVEGGRVNWERWGMCGASVAVGATIGGGVALLGC*	MGTQTIENFNTLDLETLASVEGG	RVNWERWGMCGASVAVGATIGGGVALLGC*	23	30	0.72069	2889.42	8.23143	0.939944
ATCC 7073	1708364	1708531	168	ATGGTGACATTTATGTCACTACTTTTTTA	ATGACTAAGACCATTAACAATCGTAAAAACATGACTACTCAAGAACTTGAAGCTGTATCAGGTGGAGTGGTTCCTTGGGCCGCTATTTCTGTTGGCATTGCTGCTGCAAAACTGACTTATGACCTTAGCTATGCTGCAGGTAAGTCTTTCTATAACCTCACCCACTAA	MTKTINNRKNMTTQELEAVSGGVVPWAAISVGIAAAKLTYDLSYAAGKSFYNLTH*	MTKTINNRKNMTTQELEAVSGG	VVPWAAISVGIAAAKLTYDLSYAAGKSFYNLTH*	22	34	0.587879	3496.84	9.03496	1.23835
ATCC 7073	1708180	1708344	165	ATGGTGACATTTATGTCACTACTTTTTTA	ATGACAGTGATTAACAAAGAAATGAAGGCAGCTGACCTAGCCTCAGTAACAGGAGGCGGATGGAAGACTAACCTTGCCATTGGAGGGCTCTGCCTAGCTTCAAGACCTATTGGAACTATGGTATGCCTTGGAGCCTACAATGGCTACATGGACTCTGCGCGATAA	MTVINKEMKAADLASVTGGGWKTNLAIGGLCLASRPIGTMVCLGAYNGYMDSAR*	MTVINKEMKAADLASVTGG	GWKTNLAIGGLCLASRPIGTMVCLGAYNGYMDSAR*	19	36	0.3	3658.79	8.77177	1.93773
ATCC 7073	1708186	1708344	159	ATGGTGACATTTATGTCACTACTTTTTTA	GTGATTAACAAAGAAATGAAGGCAGCTGACCTAGCCTCAGTAACAGGAGGCGGATGGAAGACTAACCTTGCCATTGGAGGGCTCTGCCTAGCTTCAAGACCTATTGGAACTATGGTATGCCTTGGAGCCTACAATGGCTACATGGACTCTGCGCGATAA	VINKEMKAADLASVTGGGWKTNLAIGGLCLASRPIGTMVCLGAYNGYMDSAR*	VINKEMKAADLASVTGG	GWKTNLAIGGLCLASRPIGTMVCLGAYNGYMDSAR*	17	36	0.3	3658.79	8.77177	1.93773
BCC42	489881	490048	168	ATGGTGACATTTATGTCACTACTTTTTTA	ATGACTAAGACCATTAACAATCGTAAAAACATGACTACTCAAGAACTTGAAGCTGTATCAGGTGGAGTAGTTCCTTGGGCCGCTATTTCTGTTGGCATCGCTGCTGCAAAACTGACTTATGACCTTAGCTATGCCGCAGGTAAATCTTTCTATAACCTCACCCACTAA	MTKTINNRKNMTTQELEAVSGGVVPWAAISVGIAAAKLTYDLSYAAGKSFYNLTH*	MTKTINNRKNMTTQELEAVSGG	VVPWAAISVGIAAAKLTYDLSYAAGKSFYNLTH*	22	34	0.587879	3496.84	9.03496	1.23835
BCC42	489697	489861	165	ATGGTGACATTTATGTCACTACTTTTTTA	ATGACAATGATTAACAAAGAAATGAAGGCAGCTGAGCTAGCCTCAGTAACAGGAGGCGGATGGAAGACCAACATCGCCATTGGAGGGCTCTGCCTAGCTTCAGGACCTATTGGAACTATGGTATGCCTTGGAGCCTACAATGGCTATATGGACTCTGCACGATAA	MTMINKEMKAAELASVTGGGWKTNIAIGGLCLASGPIGTMVCLGAYNGYMDSAR*	MTMINKEMKAAELASVTGG	GWKTNIAIGGLCLASGPIGTMVCLGAYNGYMDSAR*	19	36	0.437143	3559.71	8.21289	0.937738
BCC42	489703	489861	159	ATGGTGACATTTATGTCACTACTTTTTTA	ATGATTAACAAAGAAATGAAGGCAGCTGAGCTAGCCTCAGTAACAGGAGGCGGATGGAAGACCAACATCGCCATTGGAGGGCTCTGCCTAGCTTCAGGACCTATTGGAACTATGGTATGCCTTGGAGCCTACAATGGCTATATGGACTCTGCACGATAA	MINKEMKAAELASVTGGGWKTNIAIGGLCLASGPIGTMVCLGAYNGYMDSAR*	MINKEMKAAELASVTGG	GWKTNIAIGGLCLASGPIGTMVCLGAYNGYMDSAR*	17	36	0.437143	3559.71	8.21289	0.937738
BCC42	625026	625175	150	ATAGTGACATTTATGTCACTATTTTTTTG	ATGCGAACTAAGGTATATGGCGAAGAGCTCACTGCTGAAACGTTAGAAAATGTCACAGGGGGTGATTTTGTATCTAGACCTCAAACCTTACCTGAACGATTGGGTTGGAACAAATGGTGGTTGAAAAGAAAATACCCTTATGGTGATTAA	MRTKVYGEELTAETLENVTGGDFVSRPQTLPERLGWNKWWLKRKYPYGD*	MRTKVYGEELTAETLENVTGG	DFVSRPQTLPERLGWNKWWLKRKYPYGD*	21	29	-1.31071	3534.83	10.3219	3.00077
BCC42	1078961	1079191	231	GTAGTGACATTTATGTCACTACTTTTTTG	ATGACAACACAAATCATTAACAATTTTAACTCACTTAATTCCGAAGATCTTTCTACTGTTAAGGGTGGAGCATGTAGTTTTTGGGGAGCTACAGCTGCCGTAGGCGTCGGGGCTGTTGGAGGAGCCATTAAAGGTGGTATTCAAACAGGTACTTGGCAAGGTGCAGCCTTAAAGGGTATTGGTTATGGTATTAAAGATGGGATTACTTATGGCCTTATTTGTCGTTATTAG	MTTQIINNFNSLNSEDLSTVKGGACSFWGATAAVGVGAVGGAIKGGIQTGTWQGAALKGIGYGIKDGITYGLICRY*	MTTQIINNFNSLNSEDLSTVKGG	ACSFWGATAAVGVGAVGGAIKGGIQTGTWQGAALKGIGYGIKDGITYGLICRY*	23	54	0.524528	5203.67	9.26645	2.93663
BCC42	1087574	1087804	231	GTGGTGACATTTATGTCACTACTTTTTTG	ATGACAACACAAACAATGAACACTTTTGAAACACTCGATCTCGAGACACTTGCAAACGTTGAAGGTGGCGGATGTAGCTGGGGAGGTTTTGCTAAACAAGGAGTAGCTACAGGAGTTGGTAATGGTTTACGATTAGGTATCAAAACACGTACTTGGCAAGGTGCTGTCGCAGGAGCAGCCGGAGGTGCTATCGTAGGTGGTGTTGGTTATGGAGCAACATGCTGGTGGTGA	MTTQTMNTFETLDLETLANVEGGGCSWGGFAKQGVATGVGNGLRLGIKTRTWQGAVAGAAGGAIVGGVGYGATCWW*	MTTQTMNTFETLDLETLANVEGG	GCSWGGFAKQGVATGVGNGLRLGIKTRTWQGAVAGAAGGAIVGGVGYGATCWW*	23	54	0.332075	5136.57	10.2636	3.93758
BCC42	1087589	1087804	216	GTGGTGACATTTATGTCACTACTTTTTTG	ATGAACACTTTTGAAACACTCGATCTCGAGACACTTGCAAACGTTGAAGGTGGCGGATGTAGCTGGGGAGGTTTTGCTAAACAAGGAGTAGCTACAGGAGTTGGTAATGGTTTACGATTAGGTATCAAAACACGTACTTGGCAAGGTGCTGTCGCAGGAGCAGCCGGAGGTGCTATCGTAGGTGGTGTTGGTTATGGAGCAACATGCTGGTGGTGA	MNTFETLDLETLANVEGGGCSWGGFAKQGVATGVGNGLRLGIKTRTWQGAVAGAAGGAIVGGVGYGATCWW*	MNTFETLDLETLANVEGG	GCSWGGFAKQGVATGVGNGLRLGIKTRTWQGAVAGAAGGAIVGGVGYGATCWW*	18	54	0.332075	5136.57	10.2636	3.93758
BCC42	1091608	1091766	159	GTAGTGACATTTATGTCACTACTTTTTTA	ATGGGAACTCAAACAATTGAAAACTTTAACACCCTCGACCTTGAAACACTTGCTAGTGTTGAAGGAGGACGAGTCAATTGGGAACGATGGGGAATGTGTGGGGCCTCTGTCGCCGTAGGTGCAGCTATTGGAGGTGGAGTAGCCTTACTTGGCTGTTAA	MGTQTIENFNTLDLETLASVEGGRVNWERWGMCGASVAVGAAIGGGVALLGC*	MGTQTIENFNTLDLETLASVEGG	RVNWERWGMCGASVAVGAAIGGGVALLGC*	23	30	0.806897	2859.41	8.23143	0.939944
bf_0095	1309292	1309459	168	ATGGTGACATTTATGTCACTACTTTTTTA	ATGACTAAGACCATTAACAATCGTAAAAACATGACTACTCAAGAACTTGAAGCTGTATCAGGTGGAGTGGTTCCTTGGGCCGCTATTTCTGTTGGCATTGCTGCTGCAAAACTGACTTATGACCTTAGCTATGCTGCAGGTAAGTCTTTCTATAACCTCATCCACTAA	MTKTINNRKNMTTQELEAVSGGVVPWAAISVGIAAAKLTYDLSYAAGKSFYNLIH*	MTKTINNRKNMTTQELEAVSGG	VVPWAAISVGIAAAKLTYDLSYAAGKSFYNLIH*	22	34	0.745455	3508.88	9.03496	1.23835
bf_0095	1309107	1309271	165	ATGGTGACATTTATGTCACTACTTTTTTA	ATGACAATGATTAACAAAGAAATAAAGGTAGCTGACCTAGCCTCAGTAACAGGAGGCGGATGGAAGACCAACCTTGCCATTGGAGGGCTCTGCCTAGCTTCAGGACCTATTGGAACTATGGTATGCCTTGGAGCCTACAATGGCTACATGGACTCTGCACGATGA	MTMINKEIKVADLASVTGGGWKTNLAIGGLCLASGPIGTMVCLGAYNGYMDSAR*	MTMINKEIKVADLASVTGG	GWKTNLAIGGLCLASGPIGTMVCLGAYNGYMDSAR*	19	36	0.417143	3559.71	8.21289	0.937738
bf_0095	1309113	1309271	159	ATGGTGACATTTATGTCACTACTTTTTTA	ATGATTAACAAAGAAATAAAGGTAGCTGACCTAGCCTCAGTAACAGGAGGCGGATGGAAGACCAACCTTGCCATTGGAGGGCTCTGCCTAGCTTCAGGACCTATTGGAACTATGGTATGCCTTGGAGCCTACAATGGCTACATGGACTCTGCACGATGA	MINKEIKVADLASVTGGGWKTNLAIGGLCLASGPIGTMVCLGAYNGYMDSAR*	MINKEIKVADLASVTGG	GWKTNLAIGGLCLASGPIGTMVCLGAYNGYMDSAR*	17	36	0.417143	3559.71	8.21289	0.937738
bf_0095	1874275	1874424	150	ATAGTGACATCTATGTCACTATTTTTTTG	ATGCGTACTAAAGCATATGGCGAAGAGCTAACTGCTGAAACCTTAGAAAATGTCACAGGAGGTAATTTTGTATATAGGCCCAAGACTTTTCCTGAACGATTAGGTTGGGACAGATGGTGGTTAAAAAGAAAATACCCTTATGGCGATTAG	MRTKAYGEELTAETLENVTGGNFVYRPKTFPERLGWDRWWLKRKYPYGD*	MRTKAYGEELTAETLENVTGG	NFVYRPKTFPERLGWDRWWLKRKYPYGD*	21	29	-1.4	3672.89	10.443	3.99998
bf_0095	1937768	1937998	231	GTAGTGACATTTATGTCACTACTTTTTTG	ATGACAACACAAATCATTAACAATTTTAACTCACTTAATTCCGAAGATCTTTCTACTGTTAAGGGTGGAGCATGTAGTTTTTGGGGAGCTACAGCTGCCGTAGGCGTCGGGGCTGTTGGAGGAGCCATTAAAGGTGGTATTCAAACAGGTACTTGGCAAGGTGCAGCCTTAAAGGGTATTGGTTATGGTATTAAAGATGGGATTACTTATGGCCTTATTTGTCGTTATTAG	MTTQIINNFNSLNSEDLSTVKGGACSFWGATAAVGVGAVGGAIKGGIQTGTWQGAALKGIGYGIKDGITYGLICRY*	MTTQIINNFNSLNSEDLSTVKGG	ACSFWGATAAVGVGAVGGAIKGGIQTGTWQGAALKGIGYGIKDGITYGLICRY*	23	54	0.524528	5203.67	9.26645	2.93663
bf_0095	1946375	1946605	231	GTGGTGACATTTATGTCACTACTTTTTTG	ATGACAACACAAACAATGAACAATTTTGAAACACTCGATCTCGAGACACTTGCAAACGTTGAAGGTGGCGGATGTAGCTGGGGAGGTTTTGCTAAACAAGGAGTAGCTACAGGAGTTGGTAATGGTTTACGATTAGGTATCAAAACACGTACTTGGCAAGGTGCTGTCGCAGGAGCAGCTGGAGGTGCTATCGTAGGGGGTGTTGGTTATGGAGCAACATGCTGGTGGTGA	MTTQTMNNFETLDLETLANVEGGGCSWGGFAKQGVATGVGNGLRLGIKTRTWQGAVAGAAGGAIVGGVGYGATCWW*	MTTQTMNNFETLDLETLANVEGG	GCSWGGFAKQGVATGVGNGLRLGIKTRTWQGAVAGAAGGAIVGGVGYGATCWW*	23	54	0.332075	5136.57	10.2636	3.93758
bf_0095	1946390	1946605	216	GTGGTGACATTTATGTCACTACTTTTTTG	ATGAACAATTTTGAAACACTCGATCTCGAGACACTTGCAAACGTTGAAGGTGGCGGATGTAGCTGGGGAGGTTTTGCTAAACAAGGAGTAGCTACAGGAGTTGGTAATGGTTTACGATTAGGTATCAAAACACGTACTTGGCAAGGTGCTGTCGCAGGAGCAGCTGGAGGTGCTATCGTAGGGGGTGTTGGTTATGGAGCAACATGCTGGTGGTGA	MNNFETLDLETLANVEGGGCSWGGFAKQGVATGVGNGLRLGIKTRTWQGAVAGAAGGAIVGGVGYGATCWW*	MNNFETLDLETLANVEGG	GCSWGGFAKQGVATGVGNGLRLGIKTRTWQGAVAGAAGGAIVGGVGYGATCWW*	18	54	0.332075	5136.57	10.2636	3.93758
bf_0095	1950393	1950551	159	GTAGTGACATTTATGTCACTACTTTTTTG	ATGGGAACTCAAACAATTGAAAACTTTAACACCCTCGACCTTGAAACACTTGCTAGTGTTGAAGGAGGACGAGTCAATTGGGAACGATGGGGAATGTGTGGGGCCTCTGTCGCCGTAGGTGCAACTATTGGAGGTGGAGTAGCCTTACTTGGCTGTTAA	MGTQTIENFNTLDLETLASVEGGRVNWERWGMCGASVAVGATIGGGVALLGC*	MGTQTIENFNTLDLETLASVEGG	RVNWERWGMCGASVAVGATIGGGVALLGC*	23	30	0.72069	2889.42	8.23143	0.939944
BIOML-A1	1336688	1336858	171	TTAGTGACATGAATGTCACTATTTTTTTC	ATGTTAGAAATAAATATGATTTATTCTGATTTATCACTTACTGAACTTGCTCAAATTAATGGGGGAGGAATTCTGTCAAGTGTAGCTGGACTTGTTAAAGATACCTGGGGAACGTTATATTCTACAGGAAGAGACTTTGGACGTAGCGTTGTTAACGCTGCTATGCCTTAA	MLEINMIYSDLSLTELAQINGGGILSSVAGLVKDTWGTLYSTGRDFGRSVVNAAMP*	MLEINMIYSDLSLTELAQINGG	GILSSVAGLVKDTWGTLYSTGRDFGRSVVNAAMP*	22	35	0.244118	3524.81	9.2964	1.00063
BIOML-A1	1336870	1337040	171	TTAGTGACATGAATGTCACTATTTTTTTC	ATGTATAGAGAAAAGAGAAATGATGAAGAACTGAATATTAATGATCTTGCCATGATTAATGGTGGAGTAGCCCCTGTAGTTATTGCTGTAGGGGTAGTTGCGACACCATTCGTACTGGGCGCGATTGCTGGAGGCGCAGATGAGTACGCAAGAAAGAGAGGGCATCACTGA	MYREKRNDEELNINDLAMINGGVAPVVIAVGVVATPFVLGAIAGGADEYARKRGHH*	MYREKRNDEELNINDLAMINGG	VAPVVIAVGVVATPFVLGAIAGGADEYARKRGHH*	22	35	0.708824	3396.88	9.30118	1.4816
BIOML-A1	1336703	1336858	156	TTAGTGACATGAATGTCACTATTTTTTTC	ATGATTTATTCTGATTTATCACTTACTGAACTTGCTCAAATTAATGGGGGAGGAATTCTGTCAAGTGTAGCTGGACTTGTTAAAGATACCTGGGGAACGTTATATTCTACAGGAAGAGACTTTGGACGTAGCGTTGTTAACGCTGCTATGCCTTAA	MIYSDLSLTELAQINGGGILSSVAGLVKDTWGTLYSTGRDFGRSVVNAAMP*	MIYSDLSLTELAQINGG	GILSSVAGLVKDTWGTLYSTGRDFGRSVVNAAMP*	17	35	0.244118	3524.81	9.2964	1.00063
BIOML-A1	1436254	1436454	201	ATAGTGACATTTATGTCACTATTTTTTAT	TTGAAAACATCAGAAATGACACAACAAGTATTGACACATCAGGAATTATCAGTGGTTGTAGGTGGTGGATGTAGTTGGAACAATGCAGCTAAGGCAGCCCTCGGAACAAGTATCACGGGTCTTATCACTAGTGGCCCAGGAGGAGCTTTATTGGGATTAGCTGGAGGAGCAGTAAGTTACGGAGCGTTGTGTTGGGTATGA	LKTSEMTQQVLTHQELSVVVGGGCSWNNAAKAALGTSITGLITSGPGGALLGLAGGAVSYGALCWV*	LKTSEMTQQVLTHQELSVVVGG	GCSWNNAAKAALGTSITGLITSGPGGALLGLAGGAVSYGALCWV*	22	45	0.788636	4105.08	8.22118	0.937741
BIOML-A1	1436269	1436454	186	ATAGTGACATTTATGTCACTATTTTTTAT	ATGACACAACAAGTATTGACACATCAGGAATTATCAGTGGTTGTAGGTGGTGGATGTAGTTGGAACAATGCAGCTAAGGCAGCCCTCGGAACAAGTATCACGGGTCTTATCACTAGTGGCCCAGGAGGAGCTTTATTGGGATTAGCTGGAGGAGCAGTAAGTTACGGAGCGTTGTGTTGGGTATGA	MTQQVLTHQELSVVVGGGCSWNNAAKAALGTSITGLITSGPGGALLGLAGGAVSYGALCWV*	MTQQVLTHQELSVVVGG	GCSWNNAAKAALGTSITGLITSGPGGALLGLAGGAVSYGALCWV*	17	45	0.788636	4105.08	8.22118	0.937741
BIOML-A1	1447624	1447773	150	ATAGTGACATTTATGTCACTATTTTTTTG	ATGCGAACTAAGGCATATGGCGAAGAGCTGACTGCTGAAACCTTAGAAAATGTCACAGGGGGTGATTTTGTATCTAGACCTCAAACCTTACCTGAACGATTGGGTTGGAACAAATGGTGGTTGAAAAGAAGACCTCCTTATGGCGATTAG	MRTKAYGEELTAETLENVTGGDFVSRPQTLPERLGWNKWWLKRRPPYGD*	MRTKAYGEELTAETLENVTGG	DFVSRPQTLPERLGWNKWWLKRRPPYGD*	21	29	-1.34286	3496.83	10.8569	3.00172
BIOML-A1	1513702	1513938	237	GTAGTGACATAAATGTCACTACTTTTTTG	ATGACAACACAAATCATTAACAATTTTAATTCACTTAATTCCGAAGATCTTTCTATTATCGAAGGTGGTGGTGTGATTGGTTGTGTAGCTGGGACCGCTGGATCTGCTGGACTTGGATTTTTGACTGGAACATCAGTTGGAACTGTTACATTTCCAATTGTTGGGACTGTTTCAGGTGGAGCATTTGGAGCATGGTCAGGAGCCGGCCTTGGAATGGCTACATTTTGTGGAGTTTAG	MTTQIINNFNSLNSEDLSIIEGGGVIGCVAGTAGSAGLGFLTGTSVGTVTFPIVGTVSGGAFGAWSGAGLGMATFCGV*	MTTQIINNFNSLNSEDLSIIEGG	GVIGCVAGTAGSAGLGFLTGTSVGTVTFPIVGTVSGGAFGAWSGAGLGMATFCGV*	23	56	1.15455	4950.44	5.826	-0.0613069
BIOML-A1	1522331	1522558	228	GTGGTGACATTTATGTCACTACTTTTTTG	ATGACAACACAAACAATTAACACTTTTGAAACGCTCGATTTCGAGGCACTTGCAAACGTTGAAGGTGGAAAAGTCAATTGGGACCGCTTATCTAGTAGCGCTAGTGGTGCTGCTGAAGGGATTTACTTCTGTGCCGCATCAGGTGCCCCACTCTTTACGCTTGCACCTTATGCTATTGTAGGGTGTGGAGTTGTCGGAGCTGGTCTTGGTTATGCTTTCCCACATTAA	MTTQTINTFETLDFEALANVEGGKVNWDRLSSSASGAAEGIYFCAASGAPLFTLAPYAIVGCGVVGAGLGYAFPH*	MTTQTINTFETLDFEALANVEGG	KVNWDRLSSSASGAAEGIYFCAASGAPLFTLAPYAIVGCGVVGAGLGYAFPH*	23	53	0.630769	5188.56	7.24779	0.178455
BIOML-A1	36303	36470	168	ATAGTGACATTTATGTCACTACTTTTTTA	ATGACTAAGACCATTAACAATCGTAAACACATGACTACTCAAGAACTTGAAGCTGTATCAGGTGGGGTAGTTCCTTGGGTGGCTATTTCTGTTGGCATGGCTGCTGCAAAACTAACTTATGACCTTAGCTATGCCACAGGTAAATCTTTCTATAACCTCACCCACTAA	MTKTINNRKHMTTQELEAVSGGVVPWVAISVGMAAAKLTYDLSYATGKSFYNLTH*	MTKTINNRKHMTTQELEAVSGG	VVPWVAISVGMAAAKLTYDLSYATGKSFYNLTH*	22	34	0.506061	3572.84	9.03496	1.23835
BIOML-A1	36119	36283	165	ATAGTGACATTTATGTCACTACTTTTTTA	ATGACAATGATTAACAAAGAAATGAACACCACTGATCTAGCTACAGTAACAGGAGGCGGATGGAAGACTAACCTTGCCGTTGGAGGGCTCTGCCTAGCTTCAGGACCTATCGGAACTATGATTTGCCTTGGAGCCTACAACGGCTACATGGACTCTGCACGATAA	MTMINKEMNTTDLATVTGGGWKTNLAVGGLCLASGPIGTMICLGAYNGYMDSAR*	MTMINKEMNTTDLATVTGG	GWKTNLAVGGLCLASGPIGTMICLGAYNGYMDSAR*	19	36	0.417143	3559.71	8.21289	0.937738
BIOML-A1	36125	36283	159	ATAGTGACATTTATGTCACTACTTTTTTA	ATGATTAACAAAGAAATGAACACCACTGATCTAGCTACAGTAACAGGAGGCGGATGGAAGACTAACCTTGCCGTTGGAGGGCTCTGCCTAGCTTCAGGACCTATCGGAACTATGATTTGCCTTGGAGCCTACAACGGCTACATGGACTCTGCACGATAA	MINKEMNTTDLATVTGGGWKTNLAVGGLCLASGPIGTMICLGAYNGYMDSAR*	MINKEMNTTDLATVTGG	GWKTNLAVGGLCLASGPIGTMICLGAYNGYMDSAR*	17	36	0.417143	3559.71	8.21289	0.937738
BIOML-A1	1967486	1967680	195	ATGGTGACATTTATGTCACTATTTTTTGT	ATGGTATTGAATTTAGAAAATGTAAACTGTGTTACTCTTCAAGATGAAGAATTGATGATGGTTAACGGAGGTCTTGCACCGATTGTAATTGGTGGAGTTGTCGTAGGTTGGAAGGTCATTGGTGGCGTTGCAGGTGTTATAGCAGCAAGTGGTGCTGCAGGGATTGCAGCAGGTTATTATGCTAATCGTCCTTAA	MVLNLENVNCVTLQDEELMMVNGGLAPIVIGGVVVGWKVIGGVAGVIAASGAAGIAAGYYANRP*	MVLNLENVNCVTLQDEELMMVNGG	LAPIVIGGVVVGWKVIGGVAGVIAASGAAGIAAGYYANRP*	24	41	1.2225	3734.1	10.0086	1.99825
BIOML-A1	1967492	1967680	189	ATGGTGACATTTATGTCACTATTTTTTGT	TTGAATTTAGAAAATGTAAACTGTGTTACTCTTCAAGATGAAGAATTGATGATGGTTAACGGAGGTCTTGCACCGATTGTAATTGGTGGAGTTGTCGTAGGTTGGAAGGTCATTGGTGGCGTTGCAGGTGTTATAGCAGCAAGTGGTGCTGCAGGGATTGCAGCAGGTTATTATGCTAATCGTCCTTAA	LNLENVNCVTLQDEELMMVNGGLAPIVIGGVVVGWKVIGGVAGVIAASGAAGIAAGYYANRP*	LNLENVNCVTLQDEELMMVNGG	LAPIVIGGVVVGWKVIGGVAGVIAASGAAGIAAGYYANRP*	22	41	1.2225	3734.1	10.0086	1.99825
BIOML-A1	1967900	1968055	156	ATGGTGACATTTATGTCACTATTTTTTGT	ATGTCTAAAAAATATGAGTTGAGTAAAAAAGAATTACAGGAAATTCAAGGAGGTGTTGCACCAATTATGGTTGCTATTGGTTTAGGAAGTCTAGCAGTTGCATCATTTAGTTCAGGATATAAATTTGGAACAGATTTAGCTAGACGTGGACGATAG	MSKKYELSKKELQEIQGGVAPIMVAIGLGSLAVASFSSGYKFGTDLARRGR*	MSKKYELSKKELQEIQGG	VAPIMVAIGLGSLAVASFSSGYKFGTDLARRGR*	18	34	0.6	3366.82	11.4308	2.99983
BIOML-A10	1430067	1430234	168	ATGGTGACATTTATGTCACTACTTTTTTA	ATGACTAAGACCATTAACAATCGTAAAAACATGACTACTCAAGAACTTGAAGCTGTATCAGGTGGAGTGGTTCCTTGGGCCGCTATTTCTGTTGGCATTGCTGCTGCAAAACTGACTTATGACCTTAGCTATGCTGCAGGTAAGTCTTTCTATAACCTCATCCACTAA	MTKTINNRKNMTTQELEAVSGGVVPWAAISVGIAAAKLTYDLSYAAGKSFYNLIH*	MTKTINNRKNMTTQELEAVSGG	VVPWAAISVGIAAAKLTYDLSYAAGKSFYNLIH*	22	34	0.745455	3508.88	9.03496	1.23835
BIOML-A10	1429882	1430046	165	ATGGTGACATTTATGTCACTACTTTTTTA	ATGACAATGATTAACAAAGAAATAAAGGTAGCTGACCTAGCCTCAGTAACAGGAGGCGGATGGAAGACCAACCTTGCCATTGGAGGGCTCTGCCTAGCTTCAGGACCTATTGGAACTATGGTATGCCTTGGAGCCTACAATGGCTACATGGACTCTGCACGATGA	MTMINKEIKVADLASVTGGGWKTNLAIGGLCLASGPIGTMVCLGAYNGYMDSAR*	MTMINKEIKVADLASVTGG	GWKTNLAIGGLCLASGPIGTMVCLGAYNGYMDSAR*	19	36	0.417143	3559.71	8.21289	0.937738
BIOML-A10	1429888	1430046	159	ATGGTGACATTTATGTCACTACTTTTTTA	ATGATTAACAAAGAAATAAAGGTAGCTGACCTAGCCTCAGTAACAGGAGGCGGATGGAAGACCAACCTTGCCATTGGAGGGCTCTGCCTAGCTTCAGGACCTATTGGAACTATGGTATGCCTTGGAGCCTACAATGGCTACATGGACTCTGCACGATGA	MINKEIKVADLASVTGGGWKTNLAIGGLCLASGPIGTMVCLGAYNGYMDSAR*	MINKEIKVADLASVTGG	GWKTNLAIGGLCLASGPIGTMVCLGAYNGYMDSAR*	17	36	0.417143	3559.71	8.21289	0.937738
BIOML-A10	1610883	1611032	150	ATAGTGACATCTATGTCACTATTTTTTTG	ATGCGTACTAAAGCATATGGCGAAGAGCTAACTGCTGAAACCTTAGAAAATGTCACAGGAGGTAATTTTGTATATAGGCCCAAGACTTTTCCTGAACGATTAGGTTGGGACAGATGGTGGTTAAAAAGAAAATACCCTTATGGCGATTAG	MRTKAYGEELTAETLENVTGGNFVYRPKTFPERLGWDRWWLKRKYPYGD*	MRTKAYGEELTAETLENVTGG	NFVYRPKTFPERLGWDRWWLKRKYPYGD*	21	29	-1.4	3672.89	10.443	3.99998
BIOML-A10	1674376	1674606	231	GTAGTGACATTTATGTCACTACTTTTTTG	ATGACAACACAAATCATTAACAATTTTAACTCACTTAATTCCGAAGATCTTTCTACTGTTAAGGGTGGAGCATGTAGTTTTTGGGGAGCTACAGCTGCCGTAGGCGTCGGGGCTGTTGGAGGAGCCATTAAAGGTGGTATTCAAACAGGTACTTGGCAAGGTGCAGCCTTAAAGGGTATTGGTTATGGTATTAAAGATGGGATTACTTATGGCCTTATTTGTCGTTATTAG	MTTQIINNFNSLNSEDLSTVKGGACSFWGATAAVGVGAVGGAIKGGIQTGTWQGAALKGIGYGIKDGITYGLICRY*	MTTQIINNFNSLNSEDLSTVKGG	ACSFWGATAAVGVGAVGGAIKGGIQTGTWQGAALKGIGYGIKDGITYGLICRY*	23	54	0.524528	5203.67	9.26645	2.93663
BIOML-A10	1682983	1683213	231	GTGGTGACATTTATGTCACTACTTTTTTG	ATGACAACACAAACAATGAACAATTTTGAAACACTCGATCTCGAGACACTTGCAAACGTTGAAGGTGGCGGATGTAGCTGGGGAGGTTTTGCTAAACAAGGAGTAGCTACAGGAGTTGGTAATGGTTTACGATTAGGTATCAAAACACGTACTTGGCAAGGTGCTGTCGCAGGAGCAGCTGGAGGTGCTATCGTAGGGGGTGTTGGTTATGGAGCAACATGCTGGTGGTGA	MTTQTMNNFETLDLETLANVEGGGCSWGGFAKQGVATGVGNGLRLGIKTRTWQGAVAGAAGGAIVGGVGYGATCWW*	MTTQTMNNFETLDLETLANVEGG	GCSWGGFAKQGVATGVGNGLRLGIKTRTWQGAVAGAAGGAIVGGVGYGATCWW*	23	54	0.332075	5136.57	10.2636	3.93758
BIOML-A10	1682998	1683213	216	GTGGTGACATTTATGTCACTACTTTTTTG	ATGAACAATTTTGAAACACTCGATCTCGAGACACTTGCAAACGTTGAAGGTGGCGGATGTAGCTGGGGAGGTTTTGCTAAACAAGGAGTAGCTACAGGAGTTGGTAATGGTTTACGATTAGGTATCAAAACACGTACTTGGCAAGGTGCTGTCGCAGGAGCAGCTGGAGGTGCTATCGTAGGGGGTGTTGGTTATGGAGCAACATGCTGGTGGTGA	MNNFETLDLETLANVEGGGCSWGGFAKQGVATGVGNGLRLGIKTRTWQGAVAGAAGGAIVGGVGYGATCWW*	MNNFETLDLETLANVEGG	GCSWGGFAKQGVATGVGNGLRLGIKTRTWQGAVAGAAGGAIVGGVGYGATCWW*	18	54	0.332075	5136.57	10.2636	3.93758
BIOML-A10	1687001	1687159	159	GTAGTGACATTTATGTCACTACTTTTTTG	ATGGGAACTCAAACAATTGAAAACTTTAACACCCTCGACCTTGAAACACTTGCTAGTGTTGAAGGAGGACGAGTCAATTGGGAACGATGGGGAATGTGTGGGGCCTCTGTCGCCGTAGGTGCAACTATTGGAGGTGGAGTAGCCTTACTTGGCTGTTAA	MGTQTIENFNTLDLETLASVEGGRVNWERWGMCGASVAVGATIGGGVALLGC*	MGTQTIENFNTLDLETLASVEGG	RVNWERWGMCGASVAVGATIGGGVALLGC*	23	30	0.72069	2889.42	8.23143	0.939944
BIOML-A13	1783734	1783901	168	ATGGTGACATTTATGTCACTACTTTTTTA	ATGACTAAGACCATTAACAATCGTAAAAACATGACTACTCAAGAACTTGAAGCTGTATCAGGTGGAGTGGTTCCTTGGGCCGCTATTTCTGTTGGCATTGCTGCTGCAAAACTGACTTATGACCTTAGCTATGCTGCAGGTAAGTCTTTCTATAACCTCACCCACTAA	MTKTINNRKNMTTQELEAVSGGVVPWAAISVGIAAAKLTYDLSYAAGKSFYNLTH*	MTKTINNRKNMTTQELEAVSGG	VVPWAAISVGIAAAKLTYDLSYAAGKSFYNLTH*	22	34	0.587879	3496.84	9.03496	1.23835
BIOML-A13	1783550	1783714	165	ATGGTGACATTTATGTCACTACTTTTTTA	ATGACAATGATTAATAAAGAAATGAAGGCAGCTGACCTAGCCTCAGTAACAGGAGGCGGATGGAAGACTAACCTTGCCATTGGAGGGCTCTGCCTAGCTTCAGGACCTATTGGAACTATGATGTGCCTTGGAGCCTACAATGGCTACATGGACTCTGCGCGATAA	MTMINKEMKAADLASVTGGGWKTNLAIGGLCLASGPIGTMMCLGAYNGYMDSAR*	MTMINKEMKAADLASVTGG	GWKTNLAIGGLCLASGPIGTMMCLGAYNGYMDSAR*	19	36	0.351429	3591.68	8.21289	0.937738
BIOML-A13	1783556	1783714	159	ATGGTGACATTTATGTCACTACTTTTTTA	ATGATTAATAAAGAAATGAAGGCAGCTGACCTAGCCTCAGTAACAGGAGGCGGATGGAAGACTAACCTTGCCATTGGAGGGCTCTGCCTAGCTTCAGGACCTATTGGAACTATGATGTGCCTTGGAGCCTACAATGGCTACATGGACTCTGCGCGATAA	MINKEMKAADLASVTGGGWKTNLAIGGLCLASGPIGTMMCLGAYNGYMDSAR*	MINKEMKAADLASVTGG	GWKTNLAIGGLCLASGPIGTMMCLGAYNGYMDSAR*	17	36	0.351429	3591.68	8.21289	0.937738
BIOML-A13	762731	762880	150	ATAGTGACATTTATGTCACTATTTTTTTG	ATGCGAACTAAGGCATATGGTGAAGAGCTCAATGCTGAAACCTTAGAAAATGTTACAGGGGGTGGTTTTGTATCTAAACCTCAAACCTTACCTGAACGATTGGGTTGGAATAAATGGTGGTTGAAAAGAAGACCTCCTTATGGCGATTAG	MRTKAYGEELNAETLENVTGGGFVSKPQTLPERLGWNKWWLKRRPPYGD*	MRTKAYGEELNAETLENVTGG	GFVSKPQTLPERLGWNKWWLKRRPPYGD*	21	29	-1.21071	3410.82	11.0904	4.00077
BIOML-A13	835057	835287	231	GTAGTGACATTTATGTCACTACTTTTTTG	ATGACAACACAAATCATTAACAATTTTAACTCACTTAATTCCGAAGATCTTTCTACTGTTAAGGGTGGAGCATGTAGTTTTTGGGGAGCTACAGCTGCCGTAGGCGTCGGGGCTGTTGGAGGAGCCATTAAAGGTGGTATTCAAACAGGTACTTGGCAAGGTGCAGCCTTAAAGGGTATTGGTTATGGTATTAAAGATGGGATTACTTATGGCCTTATTTGTCGTTATTAG	MTTQIINNFNSLNSEDLSTVKGGACSFWGATAAVGVGAVGGAIKGGIQTGTWQGAALKGIGYGIKDGITYGLICRY*	MTTQIINNFNSLNSEDLSTVKGG	ACSFWGATAAVGVGAVGGAIKGGIQTGTWQGAALKGIGYGIKDGITYGLICRY*	23	54	0.524528	5203.67	9.26645	2.93663
BIOML-A13	843670	843849	180	GTGGTGACATTTATGTCACTACTTTTTTG	ATGACAACACAAACAATTAACACTTTTGAAACACTCAATCTTGAGGCACTTGCAAATGTTGAAGGTGGCGGATGGGTTAAGTGTTATGCCGGCACAATTGGATCTGCCCTAGTAGGATCAGCAGGAGGCCCAGTAGGTTACTGGGGAGGAGCTTTAGTTGGTTACGCCACATTCTGCTAA	MTTQTINTFETLNLEALANVEGGGWVKCYAGTIGSALVGSAGGPVGYWGGALVGYATFC*	MTTQTINTFETLNLEALANVEGG	GWVKCYAGTIGSALVGSAGGPVGYWGGALVGYATFC*	23	37	0.763889	3494.68	8.2049	0.936154
BIOML-A17	1689593	1689742	150	GTAGTGACATTTATGTCACTATTTTTTTG	ATGCGAACTAAGGTATATGGTGAAGAGCTCAATGCTGAAAGCTTAGAAAATGTTACAGGGGGTGGTTTTGTATCTAAACCTCAAACCTTACCTGAACGATTGGGTTGGAACAAATGGTGGTTGAAAAGAAGACCTCCTTATGGCGATTAG	MRTKVYGEELNAESLENVTGGGFVSKPQTLPERLGWNKWWLKRRPPYGD*	MRTKVYGEELNAESLENVTGG	GFVSKPQTLPERLGWNKWWLKRRPPYGD*	21	29	-1.21071	3410.82	11.0904	4.00077
BIOML-A17	1755750	1755980	231	GTAGTGACATTTATGTCACTACTTTTTTG	ATGACGACACAAATCATTAACAATTTTAACTCACTTAATTCCGAAGATCTTTCTACTGTTAAGGGTGGAGCATGTAGTTTTTGGGGAGCTACAGCTGCCGTAGGCGTCGGGGCTGTTGGAGGAGCCATTAAAGGTGGTATTCAAACAGGTACTTGGCAAGGTGCAGCCTTAAAGGGTATTGGTTATGGTATTAAAGATGGGATTACTTATGGCCTTATTTGTCGTTATTAG	MTTQIINNFNSLNSEDLSTVKGGACSFWGATAAVGVGAVGGAIKGGIQTGTWQGAALKGIGYGIKDGITYGLICRY*	MTTQIINNFNSLNSEDLSTVKGG	ACSFWGATAAVGVGAVGGAIKGGIQTGTWQGAALKGIGYGIKDGITYGLICRY*	23	54	0.524528	5203.67	9.26645	2.93663
BIOML-A17	1764363	1764542	180	GTGGTGACATTTATGTCACTACTTTTTTG	ATGACAACACAAACAATGAACACTTTTGAAACACTCGATCTCGAGACACTTGCAAACGTTGAAGGTGGCGGATGGGTTAAGTGTTATGCCGGCACAATTGGCTCTGCTCTAGTAGGATCAGCAGGAGGCCCGGTAGGTTACTGGGGAGGAGCTTTAGTTGGCTATGCTACATTCTGCTAA	MTTQTMNTFETLDLETLANVEGGGWVKCYAGTIGSALVGSAGGPVGYWGGALVGYATFC*	MTTQTMNTFETLDLETLANVEGG	GWVKCYAGTIGSALVGSAGGPVGYWGGALVGYATFC*	23	37	0.763889	3494.68	8.2049	0.936154
BIOML-A17	1764378	1764542	165	GTGGTGACATTTATGTCACTACTTTTTTG	ATGAACACTTTTGAAACACTCGATCTCGAGACACTTGCAAACGTTGAAGGTGGCGGATGGGTTAAGTGTTATGCCGGCACAATTGGCTCTGCTCTAGTAGGATCAGCAGGAGGCCCGGTAGGTTACTGGGGAGGAGCTTTAGTTGGCTATGCTACATTCTGCTAA	MNTFETLDLETLANVEGGGWVKCYAGTIGSALVGSAGGPVGYWGGALVGYATFC*	MNTFETLDLETLANVEGG	GWVKCYAGTIGSALVGSAGGPVGYWGGALVGYATFC*	18	37	0.763889	3494.68	8.2049	0.936154
BIOML-A17	97747	97914	168	ATGGTGACATTTATGTCACTACTTTTTTA	ATGACTAAGACCATTAACAATCGTAAAAACATGACTACTCAAGAACTTGAAGCTGTATCAGGTGGAGTGGTTCCTTGGGCCGCTATTTCTGTTGGCATTGCTGCTGCAAAACTGACTTATGACCTTAGCTATGCTGCAGGTAAGTCTTTCTATAACCTCACCCACTAA	MTKTINNRKNMTTQELEAVSGGVVPWAAISVGIAAAKLTYDLSYAAGKSFYNLTH*	MTKTINNRKNMTTQELEAVSGG	VVPWAAISVGIAAAKLTYDLSYAAGKSFYNLTH*	22	34	0.587879	3496.84	9.03496	1.23835
BIOML-A17	97563	97727	165	ATGGTGACATTTATGTCACTACTTTTTTA	ATGACAGTGATTAACAAAGAAATGAAGGCAGCTGACCTAGCCTCAGTAACAGGAGGCGGATGGAAGACTAACCTTGCCATTGGAGGGCTCTGCCTAGCTTCAAGACCTATTGGAACTATGGTATGCCTTGGAGCCTACAATGGCTACATGGACTCTGCGCGATAA	MTVINKEMKAADLASVTGGGWKTNLAIGGLCLASRPIGTMVCLGAYNGYMDSAR*	MTVINKEMKAADLASVTGG	GWKTNLAIGGLCLASRPIGTMVCLGAYNGYMDSAR*	19	36	0.3	3658.79	8.77177	1.93773
BIOML-A17	97569	97727	159	ATGGTGACATTTATGTCACTACTTTTTTA	GTGATTAACAAAGAAATGAAGGCAGCTGACCTAGCCTCAGTAACAGGAGGCGGATGGAAGACTAACCTTGCCATTGGAGGGCTCTGCCTAGCTTCAAGACCTATTGGAACTATGGTATGCCTTGGAGCCTACAATGGCTACATGGACTCTGCGCGATAA	VINKEMKAADLASVTGGGWKTNLAIGGLCLASRPIGTMVCLGAYNGYMDSAR*	VINKEMKAADLASVTGG	GWKTNLAIGGLCLASRPIGTMVCLGAYNGYMDSAR*	17	36	0.3	3658.79	8.77177	1.93773
BIOML-A18	27408	27575	168	ATGGTGACATTTATGTCACTACTTTTTTA	ATGACTAAGACCATTAACAATCGTAAAAACATGACTACTCAAGAACTTGAAGCTGTATCAGGTGGAGTGGTTCCTTGGGCCGCTATTTCTGTTGGCATTGCTGCTGCAAAACTGACTTATGACCTTAGCTATGCTGCAGGTAAGTCTTTCTATAACCTCACCCACTAA	MTKTINNRKNMTTQELEAVSGGVVPWAAISVGIAAAKLTYDLSYAAGKSFYNLTH*	MTKTINNRKNMTTQELEAVSGG	VVPWAAISVGIAAAKLTYDLSYAAGKSFYNLTH*	22	34	0.587879	3496.84	9.03496	1.23835
BIOML-A18	27224	27388	165	ATGGTGACATTTATGTCACTACTTTTTTA	ATGACAGTGATTAACAAAGAAATGAAGGCAGCTGACCTAGCCTCAGTAACAGGAGGCGGATGGAAGACTAACCTTGCCATTGGAGGGCTCTGCCTAGCTTCAAGACCTATTGGAACTATGGTATGCCTTGGAGCCTACAATGGCTACATGGACTCTGCGCGATAA	MTVINKEMKAADLASVTGGGWKTNLAIGGLCLASRPIGTMVCLGAYNGYMDSAR*	MTVINKEMKAADLASVTGG	GWKTNLAIGGLCLASRPIGTMVCLGAYNGYMDSAR*	19	36	0.3	3658.79	8.77177	1.93773
BIOML-A18	27230	27388	159	ATGGTGACATTTATGTCACTACTTTTTTA	GTGATTAACAAAGAAATGAAGGCAGCTGACCTAGCCTCAGTAACAGGAGGCGGATGGAAGACTAACCTTGCCATTGGAGGGCTCTGCCTAGCTTCAAGACCTATTGGAACTATGGTATGCCTTGGAGCCTACAATGGCTACATGGACTCTGCGCGATAA	VINKEMKAADLASVTGGGWKTNLAIGGLCLASRPIGTMVCLGAYNGYMDSAR*	VINKEMKAADLASVTGG	GWKTNLAIGGLCLASRPIGTMVCLGAYNGYMDSAR*	17	36	0.3	3658.79	8.77177	1.93773
BIOML-A18	273052	273201	150	GTAGTGACATTTATGTCACTATTTTTTTG	ATGCGAACTAAGGTATATGGTGAAGAGCTCAATGCTGAAAGCTTAGAAAATGTTACAGGGGGTGGTTTTGTATCTAAACCTCAAACCTTACCTGAACGATTGGGTTGGAACAAATGGTGGTTGAAAAGAAGACCTCCTTATGGCGATTAG	MRTKVYGEELNAESLENVTGGGFVSKPQTLPERLGWNKWWLKRRPPYGD*	MRTKVYGEELNAESLENVTGG	GFVSKPQTLPERLGWNKWWLKRRPPYGD*	21	29	-1.21071	3410.82	11.0904	4.00077
BIOML-A18	339209	339439	231	GTAGTGACATTTATGTCACTACTTTTTTG	ATGACGACACAAATCATTAACAATTTTAACTCACTTAATTCCGAAGATCTTTCTACTGTTAAGGGTGGAGCATGTAGTTTTTGGGGAGCTACAGCTGCCGTAGGCGTCGGGGCTGTTGGAGGAGCCATTAAAGGTGGTATTCAAACAGGTACTTGGCAAGGTGCAGCCTTAAAGGGTATTGGTTATGGTATTAAAGATGGGATTACTTATGGCCTTATTTGTCGTTATTAG	MTTQIINNFNSLNSEDLSTVKGGACSFWGATAAVGVGAVGGAIKGGIQTGTWQGAALKGIGYGIKDGITYGLICRY*	MTTQIINNFNSLNSEDLSTVKGG	ACSFWGATAAVGVGAVGGAIKGGIQTGTWQGAALKGIGYGIKDGITYGLICRY*	23	54	0.524528	5203.67	9.26645	2.93663
BIOML-A18	347822	348001	180	GTGGTGACATTTATGTCACTACTTTTTTG	ATGACAACACAAACAATGAACACTTTTGAAACACTCGATCTCGAGACACTTGCAAACGTTGAAGGTGGCGGATGGGTTAAGTGTTATGCCGGCACAATTGGCTCTGCTCTAGTAGGATCAGCAGGAGGCCCGGTAGGTTACTGGGGAGGAGCTTTAGTTGGCTATGCTACATTCTGCTAA	MTTQTMNTFETLDLETLANVEGGGWVKCYAGTIGSALVGSAGGPVGYWGGALVGYATFC*	MTTQTMNTFETLDLETLANVEGG	GWVKCYAGTIGSALVGSAGGPVGYWGGALVGYATFC*	23	37	0.763889	3494.68	8.2049	0.936154
BIOML-A18	347837	348001	165	GTGGTGACATTTATGTCACTACTTTTTTG	ATGAACACTTTTGAAACACTCGATCTCGAGACACTTGCAAACGTTGAAGGTGGCGGATGGGTTAAGTGTTATGCCGGCACAATTGGCTCTGCTCTAGTAGGATCAGCAGGAGGCCCGGTAGGTTACTGGGGAGGAGCTTTAGTTGGCTATGCTACATTCTGCTAA	MNTFETLDLETLANVEGGGWVKCYAGTIGSALVGSAGGPVGYWGGALVGYATFC*	MNTFETLDLETLANVEGG	GWVKCYAGTIGSALVGSAGGPVGYWGGALVGYATFC*	18	37	0.763889	3494.68	8.2049	0.936154
BIOML-A19	1152013	1152162	150	ATAGTGACATTTATGTCACTATTTTTTTG	ATGCGAACTAAGGCATATGGTGAAGAGCTCAATGCTGAAACCTTAGAAAATGTTACAGGGGGTGGTTTTGTATCTAAACCTCAAACCTTACCTGAACGATTGGGTTGGAATAAATGGTGGTTGAAAAGAAGACCTCCTTATGGCGATTAG	MRTKAYGEELNAETLENVTGGGFVSKPQTLPERLGWNKWWLKRRPPYGD*	MRTKAYGEELNAETLENVTGG	GFVSKPQTLPERLGWNKWWLKRRPPYGD*	21	29	-1.21071	3410.82	11.0904	4.00077
BIOML-A19	1224339	1224569	231	GTAGTGACATTTATGTCACTACTTTTTTG	ATGACAACACAAATCATTAACAATTTTAACTCACTTAATTCCGAAGATCTTTCTACTGTTAAGGGTGGAGCATGTAGTTTTTGGGGAGCTACAGCTGCCGTAGGCGTCGGGGCTGTTGGAGGAGCCATTAAAGGTGGTATTCAAACAGGTACTTGGCAAGGTGCAGCCTTAAAGGGTATTGGTTATGGTATTAAAGATGGGATTACTTATGGCCTTATTTGTCGTTATTAG	MTTQIINNFNSLNSEDLSTVKGGACSFWGATAAVGVGAVGGAIKGGIQTGTWQGAALKGIGYGIKDGITYGLICRY*	MTTQIINNFNSLNSEDLSTVKGG	ACSFWGATAAVGVGAVGGAIKGGIQTGTWQGAALKGIGYGIKDGITYGLICRY*	23	54	0.524528	5203.67	9.26645	2.93663
BIOML-A19	1232952	1233131	180	GTGGTGACATTTATGTCACTACTTTTTTG	ATGACAACACAAACAATTAACACTTTTGAAACACTCAATCTTGAGGCACTTGCAAATGTTGAAGGTGGCGGATGGGTTAAGTGTTATGCCGGCACAATTGGATCTGCCCTAGTAGGATCAGCAGGAGGCCCAGTAGGTTACTGGGGAGGAGCTTTAGTTGGTTACGCCACATTCTGCTAA	MTTQTINTFETLNLEALANVEGGGWVKCYAGTIGSALVGSAGGPVGYWGGALVGYATFC*	MTTQTINTFETLNLEALANVEGG	GWVKCYAGTIGSALVGSAGGPVGYWGGALVGYATFC*	23	37	0.763889	3494.68	8.2049	0.936154
BIOML-A19	1796540	1796707	168	ATGGTGACATTTATGTCACTACTTTTTTA	ATGACTAAGACCATTAACAATCGTAAAAACATGACTACTCAAGAACTTGAAGCTGTATCAGGTGGAGTGGTTCCTTGGGCCGCTATTTCTGTTGGCATTGCTGCTGCAAAACTGACTTATGACCTTAGCTATGCTGCAGGTAAGTCTTTCTATAACCTCACCCACTAA	MTKTINNRKNMTTQELEAVSGGVVPWAAISVGIAAAKLTYDLSYAAGKSFYNLTH*	MTKTINNRKNMTTQELEAVSGG	VVPWAAISVGIAAAKLTYDLSYAAGKSFYNLTH*	22	34	0.587879	3496.84	9.03496	1.23835
BIOML-A19	1796356	1796520	165	ATGGTGACATTTATGTCACTACTTTTTTA	ATGACAATGATTAATAAAGAAATGAAGGCAGCTGACCTAGCCTCAGTAACAGGAGGCGGATGGAAGACTAACCTTGCCATTGGAGGGCTCTGCCTAGCTTCAGGACCTATTGGAACTATGATGTGCCTTGGAGCCTACAATGGCTACATGGACTCTGCGCGATAA	MTMINKEMKAADLASVTGGGWKTNLAIGGLCLASGPIGTMMCLGAYNGYMDSAR*	MTMINKEMKAADLASVTGG	GWKTNLAIGGLCLASGPIGTMMCLGAYNGYMDSAR*	19	36	0.351429	3591.68	8.21289	0.937738
BIOML-A19	1796362	1796520	159	ATGGTGACATTTATGTCACTACTTTTTTA	ATGATTAATAAAGAAATGAAGGCAGCTGACCTAGCCTCAGTAACAGGAGGCGGATGGAAGACTAACCTTGCCATTGGAGGGCTCTGCCTAGCTTCAGGACCTATTGGAACTATGATGTGCCTTGGAGCCTACAATGGCTACATGGACTCTGCGCGATAA	MINKEMKAADLASVTGGGWKTNLAIGGLCLASGPIGTMMCLGAYNGYMDSAR*	MINKEMKAADLASVTGG	GWKTNLAIGGLCLASGPIGTMMCLGAYNGYMDSAR*	17	36	0.351429	3591.68	8.21289	0.937738
BIOML-A2	7706	7876	171	TTAGTGACATGAATGTCACTATTTTTTTC	ATGTTAGAAATAAATATGATTTATTCTGATTTATCACTTACTGAACTTGCTCAAATTAATGGGGGAGGAATTCTGTCAAGTGTAGCTGGACTTGTTAAAGATACCTGGGGAACGTTATATTCTACAGGAAGAGACTTTGGACGTAGCGTTGTTAACGCTGCTATGCCTTAA	MLEINMIYSDLSLTELAQINGGGILSSVAGLVKDTWGTLYSTGRDFGRSVVNAAMP*	MLEINMIYSDLSLTELAQINGG	GILSSVAGLVKDTWGTLYSTGRDFGRSVVNAAMP*	22	35	0.244118	3524.81	9.2964	1.00063
BIOML-A2	7888	8058	171	TTAGTGACATGAATGTCACTATTTTTTTC	ATGTATAGAGAAAAGAGAAATGATGAAGAACTGAATATTAATGATCTTGCCATGATTAATGGTGGAGTAGCCCCTGTAGTTATTGCTGTAGGGGTAGTTGCGACACCATTCGTACTGGGCGCGATTGCTGGAGGCGCAGATGAGTACGCAAGAAAGAGAGGGCATCACTGA	MYREKRNDEELNINDLAMINGGVAPVVIAVGVVATPFVLGAIAGGADEYARKRGHH*	MYREKRNDEELNINDLAMINGG	VAPVVIAVGVVATPFVLGAIAGGADEYARKRGHH*	22	35	0.708824	3396.88	9.30118	1.4816
BIOML-A2	7721	7876	156	TTAGTGACATGAATGTCACTATTTTTTTC	ATGATTTATTCTGATTTATCACTTACTGAACTTGCTCAAATTAATGGGGGAGGAATTCTGTCAAGTGTAGCTGGACTTGTTAAAGATACCTGGGGAACGTTATATTCTACAGGAAGAGACTTTGGACGTAGCGTTGTTAACGCTGCTATGCCTTAA	MIYSDLSLTELAQINGGGILSSVAGLVKDTWGTLYSTGRDFGRSVVNAAMP*	MIYSDLSLTELAQINGG	GILSSVAGLVKDTWGTLYSTGRDFGRSVVNAAMP*	17	35	0.244118	3524.81	9.2964	1.00063
BIOML-A2	1490244	1490444	201	ATAGTGACATTTATGTCACTATTTTTTAT	TTGAAAACATCAGAAATGACACAACAAGTATTGACACATCAGGAATTATCAGTGGTTGTAGGTGGTGGATGTAGTTGGAACAATGCAGCTAAGGCAGCCCTCGGAACAAGTATCACGGGTCTTATCACTAGTGGCCCAGGAGGAGCTTTATTGGGATTAGCTGGAGGAGCAGTAAGTTACGGAGCGTTGTGTTGGGTATGA	LKTSEMTQQVLTHQELSVVVGGGCSWNNAAKAALGTSITGLITSGPGGALLGLAGGAVSYGALCWV*	LKTSEMTQQVLTHQELSVVVGG	GCSWNNAAKAALGTSITGLITSGPGGALLGLAGGAVSYGALCWV*	22	45	0.788636	4105.08	8.22118	0.937741
BIOML-A2	1490259	1490444	186	ATAGTGACATTTATGTCACTATTTTTTAT	ATGACACAACAAGTATTGACACATCAGGAATTATCAGTGGTTGTAGGTGGTGGATGTAGTTGGAACAATGCAGCTAAGGCAGCCCTCGGAACAAGTATCACGGGTCTTATCACTAGTGGCCCAGGAGGAGCTTTATTGGGATTAGCTGGAGGAGCAGTAAGTTACGGAGCGTTGTGTTGGGTATGA	MTQQVLTHQELSVVVGGGCSWNNAAKAALGTSITGLITSGPGGALLGLAGGAVSYGALCWV*	MTQQVLTHQELSVVVGG	GCSWNNAAKAALGTSITGLITSGPGGALLGLAGGAVSYGALCWV*	17	45	0.788636	4105.08	8.22118	0.937741
BIOML-A2	1501614	1501763	150	ATAGTGACATTTATGTCACTATTTTTTTG	ATGCGAACTAAGGCATATGGCGAAGAGCTGACTGCTGAAACCTTAGAAAATGTCACAGGGGGTGATTTTGTATCTAGACCTCAAACCTTACCTGAACGATTGGGTTGGAACAAATGGTGGTTGAAAAGAAGACCTCCTTATGGCGATTAG	MRTKAYGEELTAETLENVTGGDFVSRPQTLPERLGWNKWWLKRRPPYGD*	MRTKAYGEELTAETLENVTGG	DFVSRPQTLPERLGWNKWWLKRRPPYGD*	21	29	-1.34286	3496.83	10.8569	3.00172
BIOML-A2	1567692	1567928	237	GTAGTGACATAAATGTCACTACTTTTTTG	ATGACAACACAAATCATTAACAATTTTAATTCACTTAATTCCGAAGATCTTTCTATTATCGAAGGTGGTGGTGTGATTGGTTGTGTAGCTGGGACCGCTGGATCTGCTGGACTTGGATTTTTGACTGGAACATCAGTTGGAACTGTTACATTTCCAATTGTTGGGACTGTTTCAGGTGGAGCATTTGGAGCATGGTCAGGAGCCGGCCTTGGAATGGCTACATTTTGTGGAGTTTAG	MTTQIINNFNSLNSEDLSIIEGGGVIGCVAGTAGSAGLGFLTGTSVGTVTFPIVGTVSGGAFGAWSGAGLGMATFCGV*	MTTQIINNFNSLNSEDLSIIEGG	GVIGCVAGTAGSAGLGFLTGTSVGTVTFPIVGTVSGGAFGAWSGAGLGMATFCGV*	23	56	1.15455	4950.44	5.826	-0.0613069
BIOML-A2	1576321	1576548	228	GTGGTGACATTTATGTCACTACTTTTTTG	ATGACAACACAAACAATTAACACTTTTGAAACGCTCGATTTCGAGGCACTTGCAAACGTTGAAGGTGGAAAAGTCAATTGGGACCGCTTATCTAGTAGCGCTAGTGGTGCTGCTGAAGGGATTTACTTCTGTGCCGCATCAGGTGCCCCACTCTTTACGCTTGCACCTTATGCTATTGTAGGGTGTGGAGTTGTCGGAGCTGGTCTTGGTTATGCTTTCCCACATTAA	MTTQTINTFETLDFEALANVEGGKVNWDRLSSSASGAAEGIYFCAASGAPLFTLAPYAIVGCGVVGAGLGYAFPH*	MTTQTINTFETLDFEALANVEGG	KVNWDRLSSSASGAAEGIYFCAASGAPLFTLAPYAIVGCGVVGAGLGYAFPH*	23	53	0.630769	5188.56	7.24779	0.178455
BIOML-A2	36303	36470	168	ATAGTGACATTTATGTCACTACTTTTTTA	ATGACTAAGACCATTAACAATCGTAAACACATGACTACTCAAGAACTTGAAGCTGTATCAGGTGGGGTAGTTCCTTGGGTGGCTATTTCTGTTGGCATGGCTGCTGCAAAACTAACTTATGACCTTAGCTATGCCACAGGTAAATCTTTCTATAACCTCACCCACTAA	MTKTINNRKHMTTQELEAVSGGVVPWVAISVGMAAAKLTYDLSYATGKSFYNLTH*	MTKTINNRKHMTTQELEAVSGG	VVPWVAISVGMAAAKLTYDLSYATGKSFYNLTH*	22	34	0.506061	3572.84	9.03496	1.23835
BIOML-A2	36119	36283	165	ATAGTGACATTTATGTCACTACTTTTTTA	ATGACAATGATTAACAAAGAAATGAACACCACTGATCTAGCTACAGTAACAGGAGGCGGATGGAAGACTAACCTTGCCGTTGGAGGGCTCTGCCTAGCTTCAGGACCTATCGGAACTATGATTTGCCTTGGAGCCTACAACGGCTACATGGACTCTGCACGATAA	MTMINKEMNTTDLATVTGGGWKTNLAVGGLCLASGPIGTMICLGAYNGYMDSAR*	MTMINKEMNTTDLATVTGG	GWKTNLAVGGLCLASGPIGTMICLGAYNGYMDSAR*	19	36	0.417143	3559.71	8.21289	0.937738
BIOML-A2	36125	36283	159	ATAGTGACATTTATGTCACTACTTTTTTA	ATGATTAACAAAGAAATGAACACCACTGATCTAGCTACAGTAACAGGAGGCGGATGGAAGACTAACCTTGCCGTTGGAGGGCTCTGCCTAGCTTCAGGACCTATCGGAACTATGATTTGCCTTGGAGCCTACAACGGCTACATGGACTCTGCACGATAA	MINKEMNTTDLATVTGGGWKTNLAVGGLCLASGPIGTMICLGAYNGYMDSAR*	MINKEMNTTDLATVTGG	GWKTNLAVGGLCLASGPIGTMICLGAYNGYMDSAR*	17	36	0.417143	3559.71	8.21289	0.937738
BIOML-A2	1802805	1802999	195	ATGGTGACATTTATGTCACTATTTTTTGT	ATGGTATTGAATTTAGAAAATGTAAACTGTGTTACTCTTCAAGATGAAGAATTGATGATGGTTAACGGAGGTCTTGCACCGATTGTAATTGGTGGAGTTGTCGTAGGTTGGAAGGTCATTGGTGGCGTTGCAGGTGTTATAGCAGCAAGTGGTGCTGCAGGGATTGCAGCAGGTTATTATGCTAATCGTCCTTAA	MVLNLENVNCVTLQDEELMMVNGGLAPIVIGGVVVGWKVIGGVAGVIAASGAAGIAAGYYANRP*	MVLNLENVNCVTLQDEELMMVNGG	LAPIVIGGVVVGWKVIGGVAGVIAASGAAGIAAGYYANRP*	24	41	1.2225	3734.1	10.0086	1.99825
BIOML-A2	1802811	1802999	189	ATGGTGACATTTATGTCACTATTTTTTGT	TTGAATTTAGAAAATGTAAACTGTGTTACTCTTCAAGATGAAGAATTGATGATGGTTAACGGAGGTCTTGCACCGATTGTAATTGGTGGAGTTGTCGTAGGTTGGAAGGTCATTGGTGGCGTTGCAGGTGTTATAGCAGCAAGTGGTGCTGCAGGGATTGCAGCAGGTTATTATGCTAATCGTCCTTAA	LNLENVNCVTLQDEELMMVNGGLAPIVIGGVVVGWKVIGGVAGVIAASGAAGIAAGYYANRP*	LNLENVNCVTLQDEELMMVNGG	LAPIVIGGVVVGWKVIGGVAGVIAASGAAGIAAGYYANRP*	22	41	1.2225	3734.1	10.0086	1.99825
BIOML-A2	1803219	1803374	156	ATGGTGACATTTATGTCACTATTTTTTGT	ATGTCTAAAAAATATGAGTTGAGTAAAAAAGAATTACAGGAAATTCAAGGAGGTGTTGCACCAATTATGGTTGCTATTGGTTTAGGAAGTCTAGCAGTTGCATCATTTAGTTCAGGATATAAATTTGGAACAGATTTAGCTAGACGTGGACGATAG	MSKKYELSKKELQEIQGGVAPIMVAIGLGSLAVASFSSGYKFGTDLARRGR*	MSKKYELSKKELQEIQGG	VAPIMVAIGLGSLAVASFSSGYKFGTDLARRGR*	18	34	0.6	3366.82	11.4308	2.99983
BIOML-A20	2374655	2374822	168	ATGGTGACATTTATGTCACTACTTTTTTA	ATGACTAAGACCATTAACAATCGTAAAAACATGACTACTCAAGAACTTGAAGCTGTATCAGGTGGAGTAGTTCCTTGGGCCGCTATTTCTGTTGGCATCGCTGCTGCAAAACTGACTTATGACCTTAGCTATGCTGCAGGTAAGTCTTTCTATAACCTCACCCACTAA	MTKTINNRKNMTTQELEAVSGGVVPWAAISVGIAAAKLTYDLSYAAGKSFYNLTH*	MTKTINNRKNMTTQELEAVSGG	VVPWAAISVGIAAAKLTYDLSYAAGKSFYNLTH*	22	34	0.587879	3496.84	9.03496	1.23835
BIOML-A20	2374471	2374635	165	ATGGTGACATTTATGTCACTACTTTTTTA	ATGACAATGATTAACAAAGAAATGAAGGCAGCTGACCTAGCCTCAGTAACAGGAGGAGGATGGAAGACTAACCTTGCCATTGGAGGGCTCTGCCTAGCTTCAGGACCTATTGGAACGATGGTATGCCTTGGAGCCTACAATGGCTACATGGACTCTGCGCGATAA	MTMINKEMKAADLASVTGGGWKTNLAIGGLCLASGPIGTMVCLGAYNGYMDSAR*	MTMINKEMKAADLASVTGG	GWKTNLAIGGLCLASGPIGTMVCLGAYNGYMDSAR*	19	36	0.417143	3559.71	8.21289	0.937738
BIOML-A20	2374477	2374635	159	ATGGTGACATTTATGTCACTACTTTTTTA	ATGATTAACAAAGAAATGAAGGCAGCTGACCTAGCCTCAGTAACAGGAGGAGGATGGAAGACTAACCTTGCCATTGGAGGGCTCTGCCTAGCTTCAGGACCTATTGGAACGATGGTATGCCTTGGAGCCTACAATGGCTACATGGACTCTGCGCGATAA	MINKEMKAADLASVTGGGWKTNLAIGGLCLASGPIGTMVCLGAYNGYMDSAR*	MINKEMKAADLASVTGG	GWKTNLAIGGLCLASGPIGTMVCLGAYNGYMDSAR*	17	36	0.417143	3559.71	8.21289	0.937738
BIOML-A20	684768	685001	234	GTGGTGACATACATGTCACTACTTTTTTG	ATGACAACACAAACAATGAACAATTTTGAAACACTCGATCTCGAGGCACTTGCAAACGTTGAAGGTGGAAATAGATGTAAAGATTTAATCTTTGGAGGAGCTTTAACTGGCGCAGGTGCTGGATTTACAGGTGGTATGGCAGCATTTGGTGTTACAGCATTTCCAGGAGCATTTGTAGGAGCACATGTTGGAGCAGTTGCTGGTGGGCTAGCATGTATCGGAGCGAGCTTTTAG	MTTQTMNNFETLDLEALANVEGGNRCKDLIFGGALTGAGAGFTGGMAAFGVTAFPGAFVGAHVGAVAGGLACIGASF*	MTTQTMNNFETLDLEALANVEGG	NRCKDLIFGGALTGAGAGFTGGMAAFGVTAFPGAFVGAHVGAVAGGLACIGASF*	23	55	0.996296	4987.47	8.24126	1.17958
BIOML-A20	684783	685001	219	GTGGTGACATACATGTCACTACTTTTTTG	ATGAACAATTTTGAAACACTCGATCTCGAGGCACTTGCAAACGTTGAAGGTGGAAATAGATGTAAAGATTTAATCTTTGGAGGAGCTTTAACTGGCGCAGGTGCTGGATTTACAGGTGGTATGGCAGCATTTGGTGTTACAGCATTTCCAGGAGCATTTGTAGGAGCACATGTTGGAGCAGTTGCTGGTGGGCTAGCATGTATCGGAGCGAGCTTTTAG	MNNFETLDLEALANVEGGNRCKDLIFGGALTGAGAGFTGGMAAFGVTAFPGAFVGAHVGAVAGGLACIGASF*	MNNFETLDLEALANVEGG	NRCKDLIFGGALTGAGAGFTGGMAAFGVTAFPGAFVGAHVGAVAGGLACIGASF*	18	55	0.996296	4987.47	8.24126	1.17958
BIOML-A20	685014	685202	189	GTGGTGACATACATGTCACTACTTTTTTG	ATGAATGTGACTAAGTATAATAAGATGTGCGATGCTGAGCTAGAAATTATTTCTGGTGGTGGGAAAGTTGGAGCAGTAATTGGTGGCTGTCTAGGTGGTATGCTCATGGCATGGGCAGCAGGACCTGTTTCCGCAGGGGGTTATACTATGATATGTGCTACTTCGGGGCTTGCAAATGCTTATTTTTGA	MNVTKYNKMCDAELEIISGGGKVGAVIGGCLGGMLMAWAAGPVSAGGYTMICATSGLANAYF*	MNVTKYNKMCDAELEIISGG	GKVGAVIGGCLGGMLMAWAAGPVSAGGYTMICATSGLANAYF*	20	43	0.985714	3992.91	8.21291	0.936947
BIOML-A20	685020	685202	183	GTGGTGACATACATGTCACTACTTTTTTG	GTGACTAAGTATAATAAGATGTGCGATGCTGAGCTAGAAATTATTTCTGGTGGTGGGAAAGTTGGAGCAGTAATTGGTGGCTGTCTAGGTGGTATGCTCATGGCATGGGCAGCAGGACCTGTTTCCGCAGGGGGTTATACTATGATATGTGCTACTTCGGGGCTTGCAAATGCTTATTTTTGA	VTKYNKMCDAELEIISGGGKVGAVIGGCLGGMLMAWAAGPVSAGGYTMICATSGLANAYF*	VTKYNKMCDAELEIISGG	GKVGAVIGGCLGGMLMAWAAGPVSAGGYTMICATSGLANAYF*	18	43	0.985714	3992.91	8.21291	0.936947
BIOML-A20	2449437	2449586	150	ATAGTGACATTTATGTCACTATTTTTTTG	ATGCGAACTAAGGCATATGGCGAAGAGCTGACTGCTGAAACCTTAGAAAATGTCACAGGGGGTGATTTTGTATCTAGACCTCAAACCTTACCTGAACGATTGGGTTGGAACAAATGGTGGTTGAAAAGAAGACCTCCTTATGGCGATTAG	MRTKAYGEELTAETLENVTGGDFVSRPQTLPERLGWNKWWLKRRPPYGD*	MRTKAYGEELTAETLENVTGG	DFVSRPQTLPERLGWNKWWLKRRPPYGD*	21	29	-1.34286	3496.83	10.8569	3.00172
BIOML-A21	1756748	1756915	168	ATGGTGACATTTATGTCACTACTTTTTTA	ATGACTAAGACCATTAACAATCGTAAAAACATGACTACTCAAGAACTTGAAGCTGTATCAGGTGGAGTGGTTCCTTGGGCCGCTATTTCTGTTGGCATTGCTGCTGCAAAACTGACTTATGACCTTAGCTATGCTGCAGGTAAGTCTTTCTATAACCTCACCCACTAA	MTKTINNRKNMTTQELEAVSGGVVPWAAISVGIAAAKLTYDLSYAAGKSFYNLTH*	MTKTINNRKNMTTQELEAVSGG	VVPWAAISVGIAAAKLTYDLSYAAGKSFYNLTH*	22	34	0.587879	3496.84	9.03496	1.23835
BIOML-A21	1756564	1756728	165	ATGGTGACATTTATGTCACTACTTTTTTA	ATGACAATGATTAATAAAGAAATGAAGGCAGCTGACCTAGCCTCAGTAACAGGAGGCGGATGGAAGACTAACCTTGCCATTGGAGGGCTCTGCCTAGCTTCAGGACCTATTGGAACTATGATGTGCCTTGGAGCCTACAATGGCTACATGGACTCTGCGCGATAA	MTMINKEMKAADLASVTGGGWKTNLAIGGLCLASGPIGTMMCLGAYNGYMDSAR*	MTMINKEMKAADLASVTGG	GWKTNLAIGGLCLASGPIGTMMCLGAYNGYMDSAR*	19	36	0.351429	3591.68	8.21289	0.937738
BIOML-A21	1756570	1756728	159	ATGGTGACATTTATGTCACTACTTTTTTA	ATGATTAATAAAGAAATGAAGGCAGCTGACCTAGCCTCAGTAACAGGAGGCGGATGGAAGACTAACCTTGCCATTGGAGGGCTCTGCCTAGCTTCAGGACCTATTGGAACTATGATGTGCCTTGGAGCCTACAATGGCTACATGGACTCTGCGCGATAA	MINKEMKAADLASVTGGGWKTNLAIGGLCLASGPIGTMMCLGAYNGYMDSAR*	MINKEMKAADLASVTGG	GWKTNLAIGGLCLASGPIGTMMCLGAYNGYMDSAR*	17	36	0.351429	3591.68	8.21289	0.937738
BIOML-A21	760664	760813	150	ATAGTGACATTTATGTCACTATTTTTTTG	ATGCGAACTAAGGCATATGGTGAAGAGCTCAATGCTGAAACCTTAGAAAATGTTACAGGGGGTGGTTTTGTATCTAAACCTCAAACCTTACCTGAACGATTGGGTTGGAATAAATGGTGGTTGAAAAGAAGACCTCCTTATGGCGATTAG	MRTKAYGEELNAETLENVTGGGFVSKPQTLPERLGWNKWWLKRRPPYGD*	MRTKAYGEELNAETLENVTGG	GFVSKPQTLPERLGWNKWWLKRRPPYGD*	21	29	-1.21071	3410.82	11.0904	4.00077
BIOML-A21	832990	833220	231	GTAGTGACATTTATGTCACTACTTTTTTG	ATGACAACACAAATCATTAACAATTTTAACTCACTTAATTCCGAAGATCTTTCTACTGTTAAGGGTGGAGCATGTAGTTTTTGGGGAGCTACAGCTGCCGTAGGCGTCGGGGCTGTTGGAGGAGCCATTAAAGGTGGTATTCAAACAGGTACTTGGCAAGGTGCAGCCTTAAAGGGTATTGGTTATGGTATTAAAGATGGGATTACTTATGGCCTTATTTGTCGTTATTAG	MTTQIINNFNSLNSEDLSTVKGGACSFWGATAAVGVGAVGGAIKGGIQTGTWQGAALKGIGYGIKDGITYGLICRY*	MTTQIINNFNSLNSEDLSTVKGG	ACSFWGATAAVGVGAVGGAIKGGIQTGTWQGAALKGIGYGIKDGITYGLICRY*	23	54	0.524528	5203.67	9.26645	2.93663
BIOML-A21	841603	841782	180	GTGGTGACATTTATGTCACTACTTTTTTG	ATGACAACACAAACAATTAACACTTTTGAAACACTCAATCTTGAGGCACTTGCAAATGTTGAAGGTGGCGGATGGGTTAAGTGTTATGCCGGCACAATTGGATCTGCCCTAGTAGGATCAGCAGGAGGCCCAGTAGGTTACTGGGGAGGAGCTTTAGTTGGTTACGCCACATTCTGCTAA	MTTQTINTFETLNLEALANVEGGGWVKCYAGTIGSALVGSAGGPVGYWGGALVGYATFC*	MTTQTINTFETLNLEALANVEGG	GWVKCYAGTIGSALVGSAGGPVGYWGGALVGYATFC*	23	37	0.763889	3494.68	8.2049	0.936154
BIOML-A22	1224393	1224542	150	ATAGTGACATTTATGTCACTATTTTTTTG	ATGCGAACTAAGGCATATGGTGAAGAGCTCAATGCTGAAACCTTAGAAAATGTTACAGGGGGTGGTTTTGTATCTAAACCTCAAACCTTACCTGAACGATTGGGTTGGAATAAATGGTGGTTGAAAAGAAGACCTCCTTATGGCGATTAG	MRTKAYGEELNAETLENVTGGGFVSKPQTLPERLGWNKWWLKRRPPYGD*	MRTKAYGEELNAETLENVTGG	GFVSKPQTLPERLGWNKWWLKRRPPYGD*	21	29	-1.21071	3410.82	11.0904	4.00077
BIOML-A22	1296719	1296949	231	GTAGTGACATTTATGTCACTACTTTTTTG	ATGACAACACAAATCATTAACAATTTTAACTCACTTAATTCCGAAGATCTTTCTACTGTTAAGGGTGGAGCATGTAGTTTTTGGGGAGCTACAGCTGCCGTAGGCGTCGGGGCTGTTGGAGGAGCCATTAAAGGTGGTATTCAAACAGGTACTTGGCAAGGTGCAGCCTTAAAGGGTATTGGTTATGGTATTAAAGATGGGATTACTTATGGCCTTATTTGTCGTTATTAG	MTTQIINNFNSLNSEDLSTVKGGACSFWGATAAVGVGAVGGAIKGGIQTGTWQGAALKGIGYGIKDGITYGLICRY*	MTTQIINNFNSLNSEDLSTVKGG	ACSFWGATAAVGVGAVGGAIKGGIQTGTWQGAALKGIGYGIKDGITYGLICRY*	23	54	0.524528	5203.67	9.26645	2.93663
BIOML-A22	1305332	1305511	180	GTGGTGACATTTATGTCACTACTTTTTTG	ATGACAACACAAACAATTAACACTTTTGAAACACTCAATCTTGAGGCACTTGCAAATGTTGAAGGTGGCGGATGGGTTAAGTGTTATGCCGGCACAATTGGATCTGCCCTAGTAGGATCAGCAGGAGGCCCAGTAGGTTACTGGGGAGGAGCTTTAGTTGGTTACGCCACATTCTGCTAA	MTTQTINTFETLNLEALANVEGGGWVKCYAGTIGSALVGSAGGPVGYWGGALVGYATFC*	MTTQTINTFETLNLEALANVEGG	GWVKCYAGTIGSALVGSAGGPVGYWGGALVGYATFC*	23	37	0.763889	3494.68	8.2049	0.936154
BIOML-A22	1765362	1765529	168	ATGGTGACATTTATGTCACTACTTTTTTA	ATGACTAAGACCATTAACAATCGTAAAAACATGACTACTCAAGAACTTGAAGCTGTATCAGGTGGAGTGGTTCCTTGGGCCGCTATTTCTGTTGGCATTGCTGCTGCAAAACTGACTTATGACCTTAGCTATGCTGCAGGTAAGTCTTTCTATAACCTCACCCACTAA	MTKTINNRKNMTTQELEAVSGGVVPWAAISVGIAAAKLTYDLSYAAGKSFYNLTH*	MTKTINNRKNMTTQELEAVSGG	VVPWAAISVGIAAAKLTYDLSYAAGKSFYNLTH*	22	34	0.587879	3496.84	9.03496	1.23835
BIOML-A22	1765178	1765342	165	ATGGTGACATTTATGTCACTACTTTTTTA	ATGACAATGATTAATAAAGAAATGAAGGCAGCTGACCTAGCCTCAGTAACAGGAGGCGGATGGAAGACTAACCTTGCCATTGGAGGGCTCTGCCTAGCTTCAGGACCTATTGGAACTATGATGTGCCTTGGAGCCTACAATGGCTACATGGACTCTGCGCGATAA	MTMINKEMKAADLASVTGGGWKTNLAIGGLCLASGPIGTMMCLGAYNGYMDSAR*	MTMINKEMKAADLASVTGG	GWKTNLAIGGLCLASGPIGTMMCLGAYNGYMDSAR*	19	36	0.351429	3591.68	8.21289	0.937738
BIOML-A22	1765184	1765342	159	ATGGTGACATTTATGTCACTACTTTTTTA	ATGATTAATAAAGAAATGAAGGCAGCTGACCTAGCCTCAGTAACAGGAGGCGGATGGAAGACTAACCTTGCCATTGGAGGGCTCTGCCTAGCTTCAGGACCTATTGGAACTATGATGTGCCTTGGAGCCTACAATGGCTACATGGACTCTGCGCGATAA	MINKEMKAADLASVTGGGWKTNLAIGGLCLASGPIGTMMCLGAYNGYMDSAR*	MINKEMKAADLASVTGG	GWKTNLAIGGLCLASGPIGTMMCLGAYNGYMDSAR*	17	36	0.351429	3591.68	8.21289	0.937738
BIOML-A23	991503	991733	231	GTAGTGACATTTATGTCACTACTTTTTTG	ATGACAACACAAATCATTAACAATTTTAACTCACTTAATTCCGAAGATCTTTCTACTGTTAAGGGTGGAGCATGTAGTTTTTGGGGAGCTACAGCTGCCGTAGGCGTCGGGGCTGTTGGAGGAGCCATTAAAGGTGGTATTCAAACAGGTACTTGGCAAGGTGCAGCCTTAAAGGGTATTGGTTATGGTATTAAAGATGGGATTACTTATGGCCTTATTTGTCGTTATTAG	MTTQIINNFNSLNSEDLSTVKGGACSFWGATAAVGVGAVGGAIKGGIQTGTWQGAALKGIGYGIKDGITYGLICRY*	MTTQIINNFNSLNSEDLSTVKGG	ACSFWGATAAVGVGAVGGAIKGGIQTGTWQGAALKGIGYGIKDGITYGLICRY*	23	54	0.524528	5203.67	9.26645	2.93663
BIOML-A23	1000116	1000295	180	GTGGTGACATTTATGTCACTACTTTTTTG	ATGACAACACAAACAATTAACACTTTTGAAACACTCAATCTTGAGGCACTTGCAAATGTTGAAGGTGGCGGATGGGTTAAGTGTTATGCCGGCACAATTGGATCTGCCCTAGTAGGATCAGCAGGAGGCCCAGTAGGTTACTGGGGAGGAGCTTTAGTTGGTTACGCCACATTCTGCTAA	MTTQTINTFETLNLEALANVEGGGWVKCYAGTIGSALVGSAGGPVGYWGGALVGYATFC*	MTTQTINTFETLNLEALANVEGG	GWVKCYAGTIGSALVGSAGGPVGYWGGALVGYATFC*	23	37	0.763889	3494.68	8.2049	0.936154
BIOML-A23	1452381	1452548	168	ATGGTGACATTTATGTCACTACTTTTTTA	ATGACTAAGACCATTAACAATCGTAAAAACATGACTACTCAAGAACTTGAAGCTGTATCAGGTGGAGTGGTTCCTTGGGCCGCTATTTCTGTTGGCATTGCTGCTGCAAAACTGACTTATGACCTTAGCTATGCTGCAGGTAAGTCTTTCTATAACCTCACCCACTAA	MTKTINNRKNMTTQELEAVSGGVVPWAAISVGIAAAKLTYDLSYAAGKSFYNLTH*	MTKTINNRKNMTTQELEAVSGG	VVPWAAISVGIAAAKLTYDLSYAAGKSFYNLTH*	22	34	0.587879	3496.84	9.03496	1.23835
BIOML-A23	1452197	1452361	165	ATGGTGACATTTATGTCACTACTTTTTTA	ATGACAATGATTAATAAAGAAATGAAGGCAGCTGACCTAGCCTCAGTAACAGGAGGCGGATGGAAGACTAACCTTGCCATTGGAGGGCTCTGCCTAGCTTCAGGACCTATTGGAACTATGATGTGCCTTGGAGCCTACAATGGCTACATGGACTCTGCGCGATAA	MTMINKEMKAADLASVTGGGWKTNLAIGGLCLASGPIGTMMCLGAYNGYMDSAR*	MTMINKEMKAADLASVTGG	GWKTNLAIGGLCLASGPIGTMMCLGAYNGYMDSAR*	19	36	0.351429	3591.68	8.21289	0.937738
BIOML-A23	1452203	1452361	159	ATGGTGACATTTATGTCACTACTTTTTTA	ATGATTAATAAAGAAATGAAGGCAGCTGACCTAGCCTCAGTAACAGGAGGCGGATGGAAGACTAACCTTGCCATTGGAGGGCTCTGCCTAGCTTCAGGACCTATTGGAACTATGATGTGCCTTGGAGCCTACAATGGCTACATGGACTCTGCGCGATAA	MINKEMKAADLASVTGGGWKTNLAIGGLCLASGPIGTMMCLGAYNGYMDSAR*	MINKEMKAADLASVTGG	GWKTNLAIGGLCLASGPIGTMMCLGAYNGYMDSAR*	17	36	0.351429	3591.68	8.21289	0.937738
BIOML-A23	51362	51511	150	ATAGTGACATTTATGTCACTATTTTTTTG	ATGCGAACTAAGGCATATGGTGAAGAGCTCAATGCTGAAACCTTAGAAAATGTTACAGGGGGTGGTTTTGTATCTAAACCTCAAACCTTACCTGAACGATTGGGTTGGAATAAATGGTGGTTGAAAAGAAGACCTCCTTATGGCGATTAG	MRTKAYGEELNAETLENVTGGGFVSKPQTLPERLGWNKWWLKRRPPYGD*	MRTKAYGEELNAETLENVTGG	GFVSKPQTLPERLGWNKWWLKRRPPYGD*	21	29	-1.21071	3410.82	11.0904	4.00077
BIOML-A24	62695	62844	150	ATAGTGACATTTATGTCACTATTTTTTTG	ATGCGAACTAAGGCATATGGTGAAGAGCTCAATGCTGAAACCTTAGAAAATGTTACAGGGGGTGGTTTTGTATCTAAACCTCAAACCTTACCTGAACGATTGGGTTGGAATAAATGGTGGTTGAAAAGAAGACCTCCTTATGGCGATTAG	MRTKAYGEELNAETLENVTGGGFVSKPQTLPERLGWNKWWLKRRPPYGD*	MRTKAYGEELNAETLENVTGG	GFVSKPQTLPERLGWNKWWLKRRPPYGD*	21	29	-1.21071	3410.82	11.0904	4.00077
BIOML-A24	135021	135251	231	GTAGTGACATTTATGTCACTACTTTTTTG	ATGACAACACAAATCATTAACAATTTTAACTCACTTAATTCCGAAGATCTTTCTACTGTTAAGGGTGGAGCATGTAGTTTTTGGGGAGCTACAGCTGCCGTAGGCGTCGGGGCTGTTGGAGGAGCCATTAAAGGTGGTATTCAAACAGGTACTTGGCAAGGTGCAGCCTTAAAGGGTATTGGTTATGGTATTAAAGATGGGATTACTTATGGCCTTATTTGTCGTTATTAG	MTTQIINNFNSLNSEDLSTVKGGACSFWGATAAVGVGAVGGAIKGGIQTGTWQGAALKGIGYGIKDGITYGLICRY*	MTTQIINNFNSLNSEDLSTVKGG	ACSFWGATAAVGVGAVGGAIKGGIQTGTWQGAALKGIGYGIKDGITYGLICRY*	23	54	0.524528	5203.67	9.26645	2.93663
BIOML-A24	143634	143813	180	GTGGTGACATTTATGTCACTACTTTTTTG	ATGACAACACAAACAATTAACACTTTTGAAACACTCAATCTTGAGGCACTTGCAAATGTTGAAGGTGGCGGATGGGTTAAGTGTTATGCCGGCACAATTGGATCTGCCCTAGTAGGATCAGCAGGAGGCCCAGTAGGTTACTGGGGAGGAGCTTTAGTTGGTTACGCCACATTCTGCTAA	MTTQTINTFETLNLEALANVEGGGWVKCYAGTIGSALVGSAGGPVGYWGGALVGYATFC*	MTTQTINTFETLNLEALANVEGG	GWVKCYAGTIGSALVGSAGGPVGYWGGALVGYATFC*	23	37	0.763889	3494.68	8.2049	0.936154
BIOML-A24	1839755	1839922	168	ATGGTGACATTTATGTCACTACTTTTTTA	ATGACTAAGACCATTAACAATCGTAAAAACATGACTACTCAAGAACTTGAAGCTGTATCAGGTGGAGTGGTTCCTTGGGCCGCTATTTCTGTTGGCATTGCTGCTGCAAAACTGACTTATGACCTTAGCTATGCTGCAGGTAAGTCTTTCTATAACCTCACCCACTAA	MTKTINNRKNMTTQELEAVSGGVVPWAAISVGIAAAKLTYDLSYAAGKSFYNLTH*	MTKTINNRKNMTTQELEAVSGG	VVPWAAISVGIAAAKLTYDLSYAAGKSFYNLTH*	22	34	0.587879	3496.84	9.03496	1.23835
BIOML-A24	1839571	1839735	165	ATGGTGACATTTATGTCACTACTTTTTTA	ATGACAATGATTAATAAAGAAATGAAGGCAGCTGACCTAGCCTCAGTAACAGGAGGCGGATGGAAGACTAACCTTGCCATTGGAGGGCTCTGCCTAGCTTCAGGACCTATTGGAACTATGATGTGCCTTGGAGCCTACAATGGCTACATGGACTCTGCGCGATAA	MTMINKEMKAADLASVTGGGWKTNLAIGGLCLASGPIGTMMCLGAYNGYMDSAR*	MTMINKEMKAADLASVTGG	GWKTNLAIGGLCLASGPIGTMMCLGAYNGYMDSAR*	19	36	0.351429	3591.68	8.21289	0.937738
BIOML-A24	1839577	1839735	159	ATGGTGACATTTATGTCACTACTTTTTTA	ATGATTAATAAAGAAATGAAGGCAGCTGACCTAGCCTCAGTAACAGGAGGCGGATGGAAGACTAACCTTGCCATTGGAGGGCTCTGCCTAGCTTCAGGACCTATTGGAACTATGATGTGCCTTGGAGCCTACAATGGCTACATGGACTCTGCGCGATAA	MINKEMKAADLASVTGGGWKTNLAIGGLCLASGPIGTMMCLGAYNGYMDSAR*	MINKEMKAADLASVTGG	GWKTNLAIGGLCLASGPIGTMMCLGAYNGYMDSAR*	17	36	0.351429	3591.68	8.21289	0.937738
BIOML-A25	724617	724766	150	ATAGTGACATTTATGTCACTATTTTTTTG	ATGCGAACTAAGGCATATGGTGAAGAGCTCAATGCTGAAACCTTAGAAAATGTTACAGGGGGTGGTTTTGTATCTAAACCTCAAACCTTACCTGAACGATTGGGTTGGAATAAATGGTGGTTGAAAAGAAGACCTCCTTATGGCGATTAG	MRTKAYGEELNAETLENVTGGGFVSKPQTLPERLGWNKWWLKRRPPYGD*	MRTKAYGEELNAETLENVTGG	GFVSKPQTLPERLGWNKWWLKRRPPYGD*	21	29	-1.21071	3410.82	11.0904	4.00077
BIOML-A25	796943	797173	231	GTAGTGACATTTATGTCACTACTTTTTTG	ATGACAACACAAATCATTAACAATTTTAACTCACTTAATTCCGAAGATCTTTCTACTGTTAAGGGTGGAGCATGTAGTTTTTGGGGAGCTACAGCTGCCGTAGGCGTCGGGGCTGTTGGAGGAGCCATTAAAGGTGGTATTCAAACAGGTACTTGGCAAGGTGCAGCCTTAAAGGGTATTGGTTATGGTATTAAAGATGGGATTACTTATGGCCTTATTTGTCGTTATTAG	MTTQIINNFNSLNSEDLSTVKGGACSFWGATAAVGVGAVGGAIKGGIQTGTWQGAALKGIGYGIKDGITYGLICRY*	MTTQIINNFNSLNSEDLSTVKGG	ACSFWGATAAVGVGAVGGAIKGGIQTGTWQGAALKGIGYGIKDGITYGLICRY*	23	54	0.524528	5203.67	9.26645	2.93663
BIOML-A25	805556	805735	180	GTGGTGACATTTATGTCACTACTTTTTTG	ATGACAACACAAACAATTAACACTTTTGAAACACTCAATCTTGAGGCACTTGCAAATGTTGAAGGTGGCGGATGGGTTAAGTGTTATGCCGGCACAATTGGATCTGCCCTAGTAGGATCAGCAGGAGGCCCAGTAGGTTACTGGGGAGGAGCTTTAGTTGGTTACGCCACATTCTGCTAA	MTTQTINTFETLNLEALANVEGGGWVKCYAGTIGSALVGSAGGPVGYWGGALVGYATFC*	MTTQTINTFETLNLEALANVEGG	GWVKCYAGTIGSALVGSAGGPVGYWGGALVGYATFC*	23	37	0.763889	3494.68	8.2049	0.936154
BIOML-A25	1797985	1798152	168	ATGGTGACATTTATGTCACTACTTTTTTA	ATGACTAAGACCATTAACAATCGTAAAAACATGACTACTCAAGAACTTGAAGCTGTATCAGGTGGAGTGGTTCCTTGGGCCGCTATTTCTGTTGGCATTGCTGCTGCAAAACTGACTTATGACCTTAGCTATGCTGCAGGTAAGTCTTTCTATAACCTCACCCACTAA	MTKTINNRKNMTTQELEAVSGGVVPWAAISVGIAAAKLTYDLSYAAGKSFYNLTH*	MTKTINNRKNMTTQELEAVSGG	VVPWAAISVGIAAAKLTYDLSYAAGKSFYNLTH*	22	34	0.587879	3496.84	9.03496	1.23835
BIOML-A25	1797801	1797965	165	ATGGTGACATTTATGTCACTACTTTTTTA	ATGACAATGATTAATAAAGAAATGAAGGCAGCTGACCTAGCCTCAGTAACAGGAGGCGGATGGAAGACTAACCTTGCCATTGGAGGGCTCTGCCTAGCTTCAGGACCTATTGGAACTATGATGTGCCTTGGAGCCTACAATGGCTACATGGACTCTGCGCGATAA	MTMINKEMKAADLASVTGGGWKTNLAIGGLCLASGPIGTMMCLGAYNGYMDSAR*	MTMINKEMKAADLASVTGG	GWKTNLAIGGLCLASGPIGTMMCLGAYNGYMDSAR*	19	36	0.351429	3591.68	8.21289	0.937738
BIOML-A25	1797807	1797965	159	ATGGTGACATTTATGTCACTACTTTTTTA	ATGATTAATAAAGAAATGAAGGCAGCTGACCTAGCCTCAGTAACAGGAGGCGGATGGAAGACTAACCTTGCCATTGGAGGGCTCTGCCTAGCTTCAGGACCTATTGGAACTATGATGTGCCTTGGAGCCTACAATGGCTACATGGACTCTGCGCGATAA	MINKEMKAADLASVTGGGWKTNLAIGGLCLASGPIGTMMCLGAYNGYMDSAR*	MINKEMKAADLASVTGG	GWKTNLAIGGLCLASGPIGTMMCLGAYNGYMDSAR*	17	36	0.351429	3591.68	8.21289	0.937738
BIOML-A26	27408	27575	168	ATGGTGACATTTATGTCACTACTTTTTTA	ATGACTAAGACCATTAACAATCGTAAAAACATGACTACTCAAGAACTTGAAGCTGTATCAGGTGGAGTGGTTCCTTGGGCCGCTATTTCTGTTGGCATTGCTGCTGCAAAACTGACTTATGACCTTAGCTATGCTGCAGGTAAGTCTTTCTATAACCTCACCCACTAA	MTKTINNRKNMTTQELEAVSGGVVPWAAISVGIAAAKLTYDLSYAAGKSFYNLTH*	MTKTINNRKNMTTQELEAVSGG	VVPWAAISVGIAAAKLTYDLSYAAGKSFYNLTH*	22	34	0.587879	3496.84	9.03496	1.23835
BIOML-A26	27224	27388	165	ATGGTGACATTTATGTCACTACTTTTTTA	ATGACAGTGATTAACAAAGAAATGAAGGCAGCTGACCTAGCCTCAGTAACAGGAGGCGGATGGAAGACTAACCTTGCCATTGGAGGGCTCTGCCTAGCTTCAAGACCTATTGGAACTATGGTATGCCTTGGAGCCTACAATGGCTACATGGACTCTGCGCGATAA	MTVINKEMKAADLASVTGGGWKTNLAIGGLCLASRPIGTMVCLGAYNGYMDSAR*	MTVINKEMKAADLASVTGG	GWKTNLAIGGLCLASRPIGTMVCLGAYNGYMDSAR*	19	36	0.3	3658.79	8.77177	1.93773
BIOML-A26	27230	27388	159	ATGGTGACATTTATGTCACTACTTTTTTA	GTGATTAACAAAGAAATGAAGGCAGCTGACCTAGCCTCAGTAACAGGAGGCGGATGGAAGACTAACCTTGCCATTGGAGGGCTCTGCCTAGCTTCAAGACCTATTGGAACTATGGTATGCCTTGGAGCCTACAATGGCTACATGGACTCTGCGCGATAA	VINKEMKAADLASVTGGGWKTNLAIGGLCLASRPIGTMVCLGAYNGYMDSAR*	VINKEMKAADLASVTGG	GWKTNLAIGGLCLASRPIGTMVCLGAYNGYMDSAR*	17	36	0.3	3658.79	8.77177	1.93773
BIOML-A26	434104	434253	150	GTAGTGACATTTATGTCACTATTTTTTTG	ATGCGAACTAAGGTATATGGTGAAGAGCTCAATGCTGAAAGCTTAGAAAATGTTACAGGGGGTGGTTTTGTATCTAAACCTCAAACCTTACCTGAACGATTGGGTTGGAACAAATGGTGGTTGAAAAGAAGACCTCCTTATGGCGATTAG	MRTKVYGEELNAESLENVTGGGFVSKPQTLPERLGWNKWWLKRRPPYGD*	MRTKVYGEELNAESLENVTGG	GFVSKPQTLPERLGWNKWWLKRRPPYGD*	21	29	-1.21071	3410.82	11.0904	4.00077
BIOML-A26	500261	500491	231	GTAGTGACATTTATGTCACTACTTTTTTG	ATGACGACACAAATCATTAACAATTTTAACTCACTTAATTCCGAAGATCTTTCTACTGTTAAGGGTGGAGCATGTAGTTTTTGGGGAGCTACAGCTGCCGTAGGCGTCGGGGCTGTTGGAGGAGCCATTAAAGGTGGTATTCAAACAGGTACTTGGCAAGGTGCAGCCTTAAAGGGTATTGGTTATGGTATTAAAGATGGGATTACTTATGGCCTTATTTGTCGTTATTAG	MTTQIINNFNSLNSEDLSTVKGGACSFWGATAAVGVGAVGGAIKGGIQTGTWQGAALKGIGYGIKDGITYGLICRY*	MTTQIINNFNSLNSEDLSTVKGG	ACSFWGATAAVGVGAVGGAIKGGIQTGTWQGAALKGIGYGIKDGITYGLICRY*	23	54	0.524528	5203.67	9.26645	2.93663
BIOML-A26	508874	509053	180	GTGGTGACATTTATGTCACTACTTTTTTG	ATGACAACACAAACAATGAACACTTTTGAAACACTCGATCTCGAGACACTTGCAAACGTTGAAGGTGGCGGATGGGTTAAGTGTTATGCCGGCACAATTGGCTCTGCTCTAGTAGGATCAGCAGGAGGCCCGGTAGGTTACTGGGGAGGAGCTTTAGTTGGCTATGCTACATTCTGCTAA	MTTQTMNTFETLDLETLANVEGGGWVKCYAGTIGSALVGSAGGPVGYWGGALVGYATFC*	MTTQTMNTFETLDLETLANVEGG	GWVKCYAGTIGSALVGSAGGPVGYWGGALVGYATFC*	23	37	0.763889	3494.68	8.2049	0.936154
BIOML-A26	508889	509053	165	GTGGTGACATTTATGTCACTACTTTTTTG	ATGAACACTTTTGAAACACTCGATCTCGAGACACTTGCAAACGTTGAAGGTGGCGGATGGGTTAAGTGTTATGCCGGCACAATTGGCTCTGCTCTAGTAGGATCAGCAGGAGGCCCGGTAGGTTACTGGGGAGGAGCTTTAGTTGGCTATGCTACATTCTGCTAA	MNTFETLDLETLANVEGGGWVKCYAGTIGSALVGSAGGPVGYWGGALVGYATFC*	MNTFETLDLETLANVEGG	GWVKCYAGTIGSALVGSAGGPVGYWGGALVGYATFC*	18	37	0.763889	3494.68	8.2049	0.936154
BIOML-A27	27067	27234	168	ATGGTGACATTTATGTCACTACTTTTTTA	ATGACTAAGACCATTAACAATCGTAAAAACATGACTACTCAAGAACTTGAAGCTGTATCAGGTGGAGTGGTTCCTTGGGCCGCTATTTCTGTTGGCATTGCTGCTGCAAAACTGACTTATGACCTTAGCTATGCTGCAGGTAAGTCTTTCTATAACCTCACCCACTAA	MTKTINNRKNMTTQELEAVSGGVVPWAAISVGIAAAKLTYDLSYAAGKSFYNLTH*	MTKTINNRKNMTTQELEAVSGG	VVPWAAISVGIAAAKLTYDLSYAAGKSFYNLTH*	22	34	0.587879	3496.84	9.03496	1.23835
BIOML-A27	26883	27047	165	ATGGTGACATTTATGTCACTACTTTTTTA	ATGACAGTGATTAACAAAGAAATGAAGGCAGCTGACCTAGCCTCAGTAACAGGAGGCGGATGGAAGACTAACCTTGCCATTGGAGGGCTCTGCCTAGCTTCAAGACCTATTGGAACTATGGTATGCCTTGGAGCCTACAATGGCTACATGGACTCTGCGCGATAA	MTVINKEMKAADLASVTGGGWKTNLAIGGLCLASRPIGTMVCLGAYNGYMDSAR*	MTVINKEMKAADLASVTGG	GWKTNLAIGGLCLASRPIGTMVCLGAYNGYMDSAR*	19	36	0.3	3658.79	8.77177	1.93773
BIOML-A27	26889	27047	159	ATGGTGACATTTATGTCACTACTTTTTTA	GTGATTAACAAAGAAATGAAGGCAGCTGACCTAGCCTCAGTAACAGGAGGCGGATGGAAGACTAACCTTGCCATTGGAGGGCTCTGCCTAGCTTCAAGACCTATTGGAACTATGGTATGCCTTGGAGCCTACAATGGCTACATGGACTCTGCGCGATAA	VINKEMKAADLASVTGGGWKTNLAIGGLCLASRPIGTMVCLGAYNGYMDSAR*	VINKEMKAADLASVTGG	GWKTNLAIGGLCLASRPIGTMVCLGAYNGYMDSAR*	17	36	0.3	3658.79	8.77177	1.93773
BIOML-A27	1779391	1779540	150	GTAGTGACATTTATGTCACTATTTTTTTG	ATGCGAACTAAGGTATATGGTGAAGAGCTCAATGCTGAAAGCTTAGAAAATGTTACAGGGGGTGGTTTTGTATCTAAACCTCAAACCTTACCTGAACGATTGGGTTGGAACAAATGGTGGTTGAAAAGAAGACCTCCTTATGGCGATTAG	MRTKVYGEELNAESLENVTGGGFVSKPQTLPERLGWNKWWLKRRPPYGD*	MRTKVYGEELNAESLENVTGG	GFVSKPQTLPERLGWNKWWLKRRPPYGD*	21	29	-1.21071	3410.82	11.0904	4.00077
BIOML-A27	1845548	1845778	231	GTAGTGACATTTATGTCACTACTTTTTTG	ATGACGACACAAATCATTAACAATTTTAACTCACTTAATTCCGAAGATCTTTCTACTGTTAAGGGTGGAGCATGTAGTTTTTGGGGAGCTACAGCTGCCGTAGGCGTCGGGGCTGTTGGAGGAGCCATTAAAGGTGGTATTCAAACAGGTACTTGGCAAGGTGCAGCCTTAAAGGGTATTGGTTATGGTATTAAAGATGGGATTACTTATGGCCTTATTTGTCGTTATTAG	MTTQIINNFNSLNSEDLSTVKGGACSFWGATAAVGVGAVGGAIKGGIQTGTWQGAALKGIGYGIKDGITYGLICRY*	MTTQIINNFNSLNSEDLSTVKGG	ACSFWGATAAVGVGAVGGAIKGGIQTGTWQGAALKGIGYGIKDGITYGLICRY*	23	54	0.524528	5203.67	9.26645	2.93663
BIOML-A27	1854161	1854340	180	GTGGTGACATTCATGTCACTACTTTTTTG	ATGACAACACAAACAATGAACACTTTTGAAACACTCGATCTCGAGACACTTGCAAACGTTGAAGGTGGCGGATGGGTTAAGTGTTATGCCGGCACAATTGGCTCTGCTCTAGTAGGATCAGCAGGAGGCCCGGTAGGTTACTGGGGAGGAGCTTTAGTTGGCTATGCTACATTCTGCTAA	MTTQTMNTFETLDLETLANVEGGGWVKCYAGTIGSALVGSAGGPVGYWGGALVGYATFC*	MTTQTMNTFETLDLETLANVEGG	GWVKCYAGTIGSALVGSAGGPVGYWGGALVGYATFC*	23	37	0.763889	3494.68	8.2049	0.936154
BIOML-A27	1854176	1854340	165	GTGGTGACATTCATGTCACTACTTTTTTG	ATGAACACTTTTGAAACACTCGATCTCGAGACACTTGCAAACGTTGAAGGTGGCGGATGGGTTAAGTGTTATGCCGGCACAATTGGCTCTGCTCTAGTAGGATCAGCAGGAGGCCCGGTAGGTTACTGGGGAGGAGCTTTAGTTGGCTATGCTACATTCTGCTAA	MNTFETLDLETLANVEGGGWVKCYAGTIGSALVGSAGGPVGYWGGALVGYATFC*	MNTFETLDLETLANVEGG	GWVKCYAGTIGSALVGSAGGPVGYWGGALVGYATFC*	18	37	0.763889	3494.68	8.2049	0.936154
BIOML-A28	27067	27234	168	ATGGTGACATTTATGTCACTACTTTTTTA	ATGACTAAGACCATTAACAATCGTAAAAACATGACTACTCAAGAACTTGAAGCTGTATCAGGTGGAGTGGTTCCTTGGGCCGCTATTTCTGTTGGCATTGCTGCTGCAAAACTGACTTATGACCTTAGCTATGCTGCAGGTAAGTCTTTCTATAACCTCACCCACTAA	MTKTINNRKNMTTQELEAVSGGVVPWAAISVGIAAAKLTYDLSYAAGKSFYNLTH*	MTKTINNRKNMTTQELEAVSGG	VVPWAAISVGIAAAKLTYDLSYAAGKSFYNLTH*	22	34	0.587879	3496.84	9.03496	1.23835
BIOML-A28	26883	27047	165	ATGGTGACATTTATGTCACTACTTTTTTA	ATGACAGTGATTAACAAAGAAATGAAGGCAGCTGACCTAGCCTCAGTAACAGGAGGCGGATGGAAGACTAACCTTGCCATTGGAGGGCTCTGCCTAGCTTCAAGACCTATTGGAACTATGGTATGCCTTGGAGCCTACAATGGCTACATGGACTCTGCGCGATAA	MTVINKEMKAADLASVTGGGWKTNLAIGGLCLASRPIGTMVCLGAYNGYMDSAR*	MTVINKEMKAADLASVTGG	GWKTNLAIGGLCLASRPIGTMVCLGAYNGYMDSAR*	19	36	0.3	3658.79	8.77177	1.93773
BIOML-A28	26889	27047	159	ATGGTGACATTTATGTCACTACTTTTTTA	GTGATTAACAAAGAAATGAAGGCAGCTGACCTAGCCTCAGTAACAGGAGGCGGATGGAAGACTAACCTTGCCATTGGAGGGCTCTGCCTAGCTTCAAGACCTATTGGAACTATGGTATGCCTTGGAGCCTACAATGGCTACATGGACTCTGCGCGATAA	VINKEMKAADLASVTGGGWKTNLAIGGLCLASRPIGTMVCLGAYNGYMDSAR*	VINKEMKAADLASVTGG	GWKTNLAIGGLCLASRPIGTMVCLGAYNGYMDSAR*	17	36	0.3	3658.79	8.77177	1.93773
BIOML-A28	1719328	1719477	150	GTAGTGACATTTATGTCACTATTTTTTTG	ATGCGAACTAAGGTATATGGTGAAGAGCTCAATGCTGAAAGCTTAGAAAATGTTACAGGGGGTGGTTTTGTATCTAAACCTCAAACCTTACCTGAACGATTGGGTTGGAACAAATGGTGGTTGAAAAGAAGACCTCCTTATGGCGATTAG	MRTKVYGEELNAESLENVTGGGFVSKPQTLPERLGWNKWWLKRRPPYGD*	MRTKVYGEELNAESLENVTGG	GFVSKPQTLPERLGWNKWWLKRRPPYGD*	21	29	-1.21071	3410.82	11.0904	4.00077
BIOML-A28	1785485	1785715	231	GTAGTGACATTTATGTCACTACTTTTTTG	ATGACGACACAAATCATTAACAATTTTAACTCACTTAATTCCGAAGATCTTTCTACTGTTAAGGGTGGAGCATGTAGTTTTTGGGGAGCTACAGCTGCCGTAGGCGTCGGGGCTGTTGGAGGAGCCATTAAAGGTGGTATTCAAACAGGTACTTGGCAAGGTGCAGCCTTAAAGGGTATTGGTTATGGTATTAAAGATGGGATTACTTATGGCCTTATTTGTCGTTATTAG	MTTQIINNFNSLNSEDLSTVKGGACSFWGATAAVGVGAVGGAIKGGIQTGTWQGAALKGIGYGIKDGITYGLICRY*	MTTQIINNFNSLNSEDLSTVKGG	ACSFWGATAAVGVGAVGGAIKGGIQTGTWQGAALKGIGYGIKDGITYGLICRY*	23	54	0.524528	5203.67	9.26645	2.93663
BIOML-A28	1794098	1794277	180	GTGGTGACATTTATGTCACTACTTTTTTG	ATGACAACACAAACAATGAACACTTTTGAAACACTCGATCTCGAGACACTTGCAAACGTTGAAGGTGGCGGATGGGTTAAGTGTTATGCCGGCACAATTGGCTCTGCTCTAGTAGGATCAGCAGGAGGCCCGGTAGGTTACTGGGGAGGAGCTTTAGTTGGCTATGCTACATTCTGCTAA	MTTQTMNTFETLDLETLANVEGGGWVKCYAGTIGSALVGSAGGPVGYWGGALVGYATFC*	MTTQTMNTFETLDLETLANVEGG	GWVKCYAGTIGSALVGSAGGPVGYWGGALVGYATFC*	23	37	0.763889	3494.68	8.2049	0.936154
BIOML-A28	1794113	1794277	165	GTGGTGACATTTATGTCACTACTTTTTTG	ATGAACACTTTTGAAACACTCGATCTCGAGACACTTGCAAACGTTGAAGGTGGCGGATGGGTTAAGTGTTATGCCGGCACAATTGGCTCTGCTCTAGTAGGATCAGCAGGAGGCCCGGTAGGTTACTGGGGAGGAGCTTTAGTTGGCTATGCTACATTCTGCTAA	MNTFETLDLETLANVEGGGWVKCYAGTIGSALVGSAGGPVGYWGGALVGYATFC*	MNTFETLDLETLANVEGG	GWVKCYAGTIGSALVGSAGGPVGYWGGALVGYATFC*	18	37	0.763889	3494.68	8.2049	0.936154
BIOML-A3	2190734	2190934	201	ATAGTGACATTTATGTCACTATTTTTTAT	TTGAAAACATTAGAAATGACACAACAAGTATTGACGCATGAGGAATTATCAGTGGTTGTAGGTGGTGGATGTAGTTGGAACAATGCAGCTAAGGCTGCCCTCGGAACAAGTATCACGGGTCTAATCACTAGTGGCCCAGGAGGAGCCTTGTTGGGATTAGCTGGAGGAGCAGTAAGTTACGGAGCGTTGTGTTGGGTATGA	LKTLEMTQQVLTHEELSVVVGGGCSWNNAAKAALGTSITGLITSGPGGALLGLAGGAVSYGALCWV*	LKTLEMTQQVLTHEELSVVVGG	GCSWNNAAKAALGTSITGLITSGPGGALLGLAGGAVSYGALCWV*	22	45	0.788636	4105.08	8.22118	0.937741
BIOML-A3	2190749	2190934	186	ATAGTGACATTTATGTCACTATTTTTTAT	ATGACACAACAAGTATTGACGCATGAGGAATTATCAGTGGTTGTAGGTGGTGGATGTAGTTGGAACAATGCAGCTAAGGCTGCCCTCGGAACAAGTATCACGGGTCTAATCACTAGTGGCCCAGGAGGAGCCTTGTTGGGATTAGCTGGAGGAGCAGTAAGTTACGGAGCGTTGTGTTGGGTATGA	MTQQVLTHEELSVVVGGGCSWNNAAKAALGTSITGLITSGPGGALLGLAGGAVSYGALCWV*	MTQQVLTHEELSVVVGG	GCSWNNAAKAALGTSITGLITSGPGGALLGLAGGAVSYGALCWV*	17	45	0.788636	4105.08	8.22118	0.937741
BIOML-A3	2202103	2202252	150	GTAGTGACATTTATGTCACTATTTTTTTG	ATGCGAACTAAGGCATATGGTGAAGAGCTCAATGCTGAAACCTTAGAAAATGTTACAGGGGGTGGTTTTGTATCTAAACCTCAAACCTTACCTGAACGATTGGGTTGGAACAAATGGTGGTTGAAAAGAAGACCTCCTTATGGCGATTAG	MRTKAYGEELNAETLENVTGGGFVSKPQTLPERLGWNKWWLKRRPPYGD*	MRTKAYGEELNAETLENVTGG	GFVSKPQTLPERLGWNKWWLKRRPPYGD*	21	29	-1.21071	3410.82	11.0904	4.00077
BIOML-A3	2272471	2272704	234	GTGGTGACATACATGTCACTACTTTTTTG	ATGACAACACAAACAATGAACAATTTTGAAACACTCGATCTCGAGGCACTTGCAAACGTTGAAGGTGGAAATAGATGTAAAGATTTAATCTTTGGAGGAGCTTTAACTGGCGCAGGTGCTGGATTTACAGGTGGTATGGCAGCATTTGGTGTTACAGCATTTCCAGGAGCATTTGTAGGAGCACATGTTGGAGCAGTTGCTGGTGGGCTAGCATGTATCGGAGCGAGCTTTTAG	MTTQTMNNFETLDLEALANVEGGNRCKDLIFGGALTGAGAGFTGGMAAFGVTAFPGAFVGAHVGAVAGGLACIGASF*	MTTQTMNNFETLDLEALANVEGG	NRCKDLIFGGALTGAGAGFTGGMAAFGVTAFPGAFVGAHVGAVAGGLACIGASF*	23	55	0.996296	4987.47	8.24126	1.17958
BIOML-A3	2272486	2272704	219	GTGGTGACATACATGTCACTACTTTTTTG	ATGAACAATTTTGAAACACTCGATCTCGAGGCACTTGCAAACGTTGAAGGTGGAAATAGATGTAAAGATTTAATCTTTGGAGGAGCTTTAACTGGCGCAGGTGCTGGATTTACAGGTGGTATGGCAGCATTTGGTGTTACAGCATTTCCAGGAGCATTTGTAGGAGCACATGTTGGAGCAGTTGCTGGTGGGCTAGCATGTATCGGAGCGAGCTTTTAG	MNNFETLDLEALANVEGGNRCKDLIFGGALTGAGAGFTGGMAAFGVTAFPGAFVGAHVGAVAGGLACIGASF*	MNNFETLDLEALANVEGG	NRCKDLIFGGALTGAGAGFTGGMAAFGVTAFPGAFVGAHVGAVAGGLACIGASF*	18	55	0.996296	4987.47	8.24126	1.17958
BIOML-A3	2272717	2272905	189	GTGGTGACATACATGTCACTACTTTTTTG	ATGAATGTGACTAAGTATAATAAGATGTGCGATGCTGAGCTAGAAATTATTTCTGGTGGTGGGAAAGTTGGAGCAGTAATTGGTGGCTGTCTAGGTGGTATGCTCATGGCATGGGCAGCAGGACCTGTTTCCGCAGGGGGTTATACTATGATATGTGCTACTTCGGGGCTTGCAAATGCTTATTTTTGA	MNVTKYNKMCDAELEIISGGGKVGAVIGGCLGGMLMAWAAGPVSAGGYTMICATSGLANAYF*	MNVTKYNKMCDAELEIISGG	GKVGAVIGGCLGGMLMAWAAGPVSAGGYTMICATSGLANAYF*	20	43	0.985714	3992.91	8.21291	0.936947
BIOML-A3	2272723	2272905	183	GTGGTGACATACATGTCACTACTTTTTTG	GTGACTAAGTATAATAAGATGTGCGATGCTGAGCTAGAAATTATTTCTGGTGGTGGGAAAGTTGGAGCAGTAATTGGTGGCTGTCTAGGTGGTATGCTCATGGCATGGGCAGCAGGACCTGTTTCCGCAGGGGGTTATACTATGATATGTGCTACTTCGGGGCTTGCAAATGCTTATTTTTGA	VTKYNKMCDAELEIISGGGKVGAVIGGCLGGMLMAWAAGPVSAGGYTMICATSGLANAYF*	VTKYNKMCDAELEIISGG	GKVGAVIGGCLGGMLMAWAAGPVSAGGYTMICATSGLANAYF*	18	43	0.985714	3992.91	8.21291	0.936947
BIOML-A3	419790	419957	168	ATAGTGACATTTATGTCACTACTTTTTTA	ATGACTAAGACAATTAACAATCGTAAACACATGACTACTCAAGAACTTGAAGCTATATCAGGTGGAGTGGTTCCCTGGGTGGCTATTTCTGTTGGCATGGCTGCTGCAAAACTGACTTATGACCTTAGCTATACTGCGGGTAAATCTTTCTATAACCTCACCCACTAA	MTKTINNRKHMTTQELEAISGGVVPWVAISVGMAAAKLTYDLSYTAGKSFYNLTH*	MTKTINNRKHMTTQELEAISGG	VVPWVAISVGMAAAKLTYDLSYTAGKSFYNLTH*	22	34	0.506061	3572.84	9.03496	1.23835
BIOML-A3	419605	419769	165	ATAGTGACATTTATGTCACTACTTTTTTA	ATGACAATGATTAACAAAGAAATGAACACCACTGATCTAGCTACAGTAACAGGAGGCGGATGGAAGACCAACCTTGCCATTGGAGGGCTCTGCCTAGCTTCAGGACCTATTGGAACTATGATTTGCCTTGGTGCCTACAACGGCTACATGGACTCTGCACGATAA	MTMINKEMNTTDLATVTGGGWKTNLAIGGLCLASGPIGTMICLGAYNGYMDSAR*	MTMINKEMNTTDLATVTGG	GWKTNLAIGGLCLASGPIGTMICLGAYNGYMDSAR*	19	36	0.425714	3573.72	8.21289	0.937738
BIOML-A3	419611	419769	159	ATAGTGACATTTATGTCACTACTTTTTTA	ATGATTAACAAAGAAATGAACACCACTGATCTAGCTACAGTAACAGGAGGCGGATGGAAGACCAACCTTGCCATTGGAGGGCTCTGCCTAGCTTCAGGACCTATTGGAACTATGATTTGCCTTGGTGCCTACAACGGCTACATGGACTCTGCACGATAA	MINKEMNTTDLATVTGGGWKTNLAIGGLCLASGPIGTMICLGAYNGYMDSAR*	MINKEMNTTDLATVTGG	GWKTNLAIGGLCLASGPIGTMICLGAYNGYMDSAR*	17	36	0.425714	3573.72	8.21289	0.937738
BIOML-A30	27408	27575	168	ATGGTGACATTTATGTCACTACTTTTTTA	ATGACTAAGACCATTAACAATCGTAAAAACATGACTACTCAAGAACTTGAAGCTGTATCAGGTGGAGTGGTTCCTTGGGCCGCTATTTCTGTTGGCATTGCTGCTGCAAAACTGACTTATGACCTTAGCTATGCTGCAGGTAAGTCTTTCTATAACCTCACCCACTAA	MTKTINNRKNMTTQELEAVSGGVVPWAAISVGIAAAKLTYDLSYAAGKSFYNLTH*	MTKTINNRKNMTTQELEAVSGG	VVPWAAISVGIAAAKLTYDLSYAAGKSFYNLTH*	22	34	0.587879	3496.84	9.03496	1.23835
BIOML-A30	27224	27388	165	ATGGTGACATTTATGTCACTACTTTTTTA	ATGACAGTGATTAACAAAGAAATGAAGGCAGCTGACCTAGCCTCAGTAACAGGAGGCGGATGGAAGACTAACCTTGCCATTGGAGGGCTCTGCCTAGCTTCAAGACCTATTGGAACTATGGTATGCCTTGGAGCCTACAATGGCTACATGGACTCTGCGCGATAA	MTVINKEMKAADLASVTGGGWKTNLAIGGLCLASRPIGTMVCLGAYNGYMDSAR*	MTVINKEMKAADLASVTGG	GWKTNLAIGGLCLASRPIGTMVCLGAYNGYMDSAR*	19	36	0.3	3658.79	8.77177	1.93773
BIOML-A30	27230	27388	159	ATGGTGACATTTATGTCACTACTTTTTTA	GTGATTAACAAAGAAATGAAGGCAGCTGACCTAGCCTCAGTAACAGGAGGCGGATGGAAGACTAACCTTGCCATTGGAGGGCTCTGCCTAGCTTCAAGACCTATTGGAACTATGGTATGCCTTGGAGCCTACAATGGCTACATGGACTCTGCGCGATAA	VINKEMKAADLASVTGGGWKTNLAIGGLCLASRPIGTMVCLGAYNGYMDSAR*	VINKEMKAADLASVTGG	GWKTNLAIGGLCLASRPIGTMVCLGAYNGYMDSAR*	17	36	0.3	3658.79	8.77177	1.93773
BIOML-A30	1927123	1927272	150	GTAGTGACATTTATGTCACTATTTTTTTG	ATGCGAACTAAGGTATATGGTGAAGAGCTCAATGCTGAAAGCTTAGAAAATGTTACAGGGGGTGGTTTTGTATCTAAACCTCAAACCTTACCTGAACGATTGGGTTGGAACAAATGGTGGTTGAAAAGAAGACCTCCTTATGGCGATTAG	MRTKVYGEELNAESLENVTGGGFVSKPQTLPERLGWNKWWLKRRPPYGD*	MRTKVYGEELNAESLENVTGG	GFVSKPQTLPERLGWNKWWLKRRPPYGD*	21	29	-1.21071	3410.82	11.0904	4.00077
BIOML-A30	1993280	1993510	231	GTAGTGACATTTATGTCACTACTTTTTTG	ATGACGACACAAATCATTAACAATTTTAACTCACTTAATTCCGAAGATCTTTCTACTGTTAAGGGTGGAGCATGTAGTTTTTGGGGAGCTACAGCTGCCGTAGGCGTCGGGGCTGTTGGAGGAGCCATTAAAGGTGGTATTCAAACAGGTACTTGGCAAGGTGCAGCCTTAAAGGGTATTGGTTATGGTATTAAAGATGGGATTACTTATGGCCTTATTTGTCGTTATTAG	MTTQIINNFNSLNSEDLSTVKGGACSFWGATAAVGVGAVGGAIKGGIQTGTWQGAALKGIGYGIKDGITYGLICRY*	MTTQIINNFNSLNSEDLSTVKGG	ACSFWGATAAVGVGAVGGAIKGGIQTGTWQGAALKGIGYGIKDGITYGLICRY*	23	54	0.524528	5203.67	9.26645	2.93663
BIOML-A30	2001893	2002072	180	GTGGTGACATTTATGTCACTACTTTTTTG	ATGACAACACAAACAATGAACACTTTTGAAACACTCGATCTCGAGACACTTGCAAACGTTGAAGGTGGCGGATGGGTTAAGTGTTATGCCGGCACAATTGGCTCTGCTCTAGTAGGATCAGCAGGAGGCCCGGTAGGTTACTGGGGAGGAGCTTTAGTTGGCTATGCTACATTCTGCTAA	MTTQTMNTFETLDLETLANVEGGGWVKCYAGTIGSALVGSAGGPVGYWGGALVGYATFC*	MTTQTMNTFETLDLETLANVEGG	GWVKCYAGTIGSALVGSAGGPVGYWGGALVGYATFC*	23	37	0.763889	3494.68	8.2049	0.936154
BIOML-A30	2001908	2002072	165	GTGGTGACATTTATGTCACTACTTTTTTG	ATGAACACTTTTGAAACACTCGATCTCGAGACACTTGCAAACGTTGAAGGTGGCGGATGGGTTAAGTGTTATGCCGGCACAATTGGCTCTGCTCTAGTAGGATCAGCAGGAGGCCCGGTAGGTTACTGGGGAGGAGCTTTAGTTGGCTATGCTACATTCTGCTAA	MNTFETLDLETLANVEGGGWVKCYAGTIGSALVGSAGGPVGYWGGALVGYATFC*	MNTFETLDLETLANVEGG	GWVKCYAGTIGSALVGSAGGPVGYWGGALVGYATFC*	18	37	0.763889	3494.68	8.2049	0.936154
BIOML-A31	1734092	1734241	150	GTAGTGACATTTATGTCACTATTTTTTTG	ATGCGAACTAAGGTATATGGTGAAGAGCTCAATGCTGAAAGCTTAGAAAATGTTACAGGGGGTGGTTTTGTATCTAAACCTCAAACCTTACCTGAACGATTGGGTTGGAACAAATGGTGGTTGAAAAGAAGACCTCCTTATGGCGATTAG	MRTKVYGEELNAESLENVTGGGFVSKPQTLPERLGWNKWWLKRRPPYGD*	MRTKVYGEELNAESLENVTGG	GFVSKPQTLPERLGWNKWWLKRRPPYGD*	21	29	-1.21071	3410.82	11.0904	4.00077
BIOML-A31	1800249	1800479	231	GTAGTGACATTTATGTCACTACTTTTTTG	ATGACGACACAAATCATTAACAATTTTAACTCACTTAATTCCGAAGATCTTTCTACTGTTAAGGGTGGAGCATGTAGTTTTTGGGGAGCTACAGCTGCCGTAGGCGTCGGGGCTGTTGGAGGAGCCATTAAAGGTGGTATTCAAACAGGTACTTGGCAAGGTGCAGCCTTAAAGGGTATTGGTTATGGTATTAAAGATGGGATTACTTATGGCCTTATTTGTCGTTATTAG	MTTQIINNFNSLNSEDLSTVKGGACSFWGATAAVGVGAVGGAIKGGIQTGTWQGAALKGIGYGIKDGITYGLICRY*	MTTQIINNFNSLNSEDLSTVKGG	ACSFWGATAAVGVGAVGGAIKGGIQTGTWQGAALKGIGYGIKDGITYGLICRY*	23	54	0.524528	5203.67	9.26645	2.93663
BIOML-A31	1808862	1809041	180	GTGGTGACATTTATGTCACTACTTTTTTG	ATGACAACACAAACAATGAACACTTTTGAAACACTCGATCTCGAGACACTTGCAAACGTTGAAGGTGGCGGATGGGTTAAGTGTTATGCCGGCACAATTGGCTCTGCTCTAGTAGGATCAGCAGGAGGCCCGGTAGGTTACTGGGGAGGAGCTTTAGTTGGCTATGCTACATTCTGCTAA	MTTQTMNTFETLDLETLANVEGGGWVKCYAGTIGSALVGSAGGPVGYWGGALVGYATFC*	MTTQTMNTFETLDLETLANVEGG	GWVKCYAGTIGSALVGSAGGPVGYWGGALVGYATFC*	23	37	0.763889	3494.68	8.2049	0.936154
BIOML-A31	1808877	1809041	165	GTGGTGACATTTATGTCACTACTTTTTTG	ATGAACACTTTTGAAACACTCGATCTCGAGACACTTGCAAACGTTGAAGGTGGCGGATGGGTTAAGTGTTATGCCGGCACAATTGGCTCTGCTCTAGTAGGATCAGCAGGAGGCCCGGTAGGTTACTGGGGAGGAGCTTTAGTTGGCTATGCTACATTCTGCTAA	MNTFETLDLETLANVEGGGWVKCYAGTIGSALVGSAGGPVGYWGGALVGYATFC*	MNTFETLDLETLANVEGG	GWVKCYAGTIGSALVGSAGGPVGYWGGALVGYATFC*	18	37	0.763889	3494.68	8.2049	0.936154
BIOML-A31	2288712	2288879	168	ATGGTGACATTTATGTCACTACTTTTTTA	ATGACTAAGACCATTAACAATCGTAAAAACATGACTACTCAAGAACTTGAAGCTGTATCAGGTGGAGTGGTTCCTTGGGCCGCTATTTCTGTTGGCATTGCTGCTGCAAAACTGACTTATGACCTTAGCTATGCTGCAGGTAAGTCTTTCTATAACCTCACCCACTAA	MTKTINNRKNMTTQELEAVSGGVVPWAAISVGIAAAKLTYDLSYAAGKSFYNLTH*	MTKTINNRKNMTTQELEAVSGG	VVPWAAISVGIAAAKLTYDLSYAAGKSFYNLTH*	22	34	0.587879	3496.84	9.03496	1.23835
BIOML-A31	2288528	2288692	165	ATGGTGACATTTATGTCACTACTTTTTTA	ATGACAGTGATTAACAAAGAAATGAAGGCAGCTGACCTAGCCTCAGTAACAGGAGGCGGATGGAAGACTAACCTTGCCATTGGAGGGCTCTGCCTAGCTTCAAGACCTATTGGAACTATGGTATGCCTTGGAGCCTACAATGGCTACATGGACTCTGCGCGATAA	MTVINKEMKAADLASVTGGGWKTNLAIGGLCLASRPIGTMVCLGAYNGYMDSAR*	MTVINKEMKAADLASVTGG	GWKTNLAIGGLCLASRPIGTMVCLGAYNGYMDSAR*	19	36	0.3	3658.79	8.77177	1.93773
BIOML-A31	2288534	2288692	159	ATGGTGACATTTATGTCACTACTTTTTTA	GTGATTAACAAAGAAATGAAGGCAGCTGACCTAGCCTCAGTAACAGGAGGCGGATGGAAGACTAACCTTGCCATTGGAGGGCTCTGCCTAGCTTCAAGACCTATTGGAACTATGGTATGCCTTGGAGCCTACAATGGCTACATGGACTCTGCGCGATAA	VINKEMKAADLASVTGGGWKTNLAIGGLCLASRPIGTMVCLGAYNGYMDSAR*	VINKEMKAADLASVTGG	GWKTNLAIGGLCLASRPIGTMVCLGAYNGYMDSAR*	17	36	0.3	3658.79	8.77177	1.93773
BIOML-A32	95770	95937	168	ATGGTGACATTTATGTCACTACTTTTTTA	ATGACTAAGACCATTAACAATCGTAAAAACATGACTACTCAAGAACTTGAAGCTGTATCAGGTGGAGTGGTTCCTTGGGCCGCTATTTCTGTTGGCATTGCTGCTGCAAAACTGACTTATGACCTTAGCTATGCTGCAGGTAAGTCTTTCTATAACCTCACCCACTAA	MTKTINNRKNMTTQELEAVSGGVVPWAAISVGIAAAKLTYDLSYAAGKSFYNLTH*	MTKTINNRKNMTTQELEAVSGG	VVPWAAISVGIAAAKLTYDLSYAAGKSFYNLTH*	22	34	0.587879	3496.84	9.03496	1.23835
BIOML-A32	95586	95750	165	ATGGTGACATTTATGTCACTACTTTTTTA	ATGACAGTGATTAACAAAGAAATGAAGGCAGCTGACCTAGCCTCAGTAACAGGAGGCGGATGGAAGACTAACCTTGCCATTGGAGGGCTCTGCCTAGCTTCAAGACCTATTGGAACTATGGTATGCCTTGGAGCCTACAATGGCTACATGGACTCTGCGCGATAA	MTVINKEMKAADLASVTGGGWKTNLAIGGLCLASRPIGTMVCLGAYNGYMDSAR*	MTVINKEMKAADLASVTGG	GWKTNLAIGGLCLASRPIGTMVCLGAYNGYMDSAR*	19	36	0.3	3658.79	8.77177	1.93773
BIOML-A32	95592	95750	159	ATGGTGACATTTATGTCACTACTTTTTTA	GTGATTAACAAAGAAATGAAGGCAGCTGACCTAGCCTCAGTAACAGGAGGCGGATGGAAGACTAACCTTGCCATTGGAGGGCTCTGCCTAGCTTCAAGACCTATTGGAACTATGGTATGCCTTGGAGCCTACAATGGCTACATGGACTCTGCGCGATAA	VINKEMKAADLASVTGGGWKTNLAIGGLCLASRPIGTMVCLGAYNGYMDSAR*	VINKEMKAADLASVTGG	GWKTNLAIGGLCLASRPIGTMVCLGAYNGYMDSAR*	17	36	0.3	3658.79	8.77177	1.93773
BIOML-A32	1661790	1661939	150	GTAGTGACATTTATGTCACTATTTTTTTG	ATGCGAACTAAGGTATATGGTGAAGAGCTCAATGCTGAAAGCTTAGAAAATGTTACAGGGGGTGGTTTTGTATCTAAACCTCAAACCTTACCTGAACGATTGGGTTGGAACAAATGGTGGTTGAAAAGAAGACCTCCTTATGGCGATTAG	MRTKVYGEELNAESLENVTGGGFVSKPQTLPERLGWNKWWLKRRPPYGD*	MRTKVYGEELNAESLENVTGG	GFVSKPQTLPERLGWNKWWLKRRPPYGD*	21	29	-1.21071	3410.82	11.0904	4.00077
BIOML-A32	1727947	1728177	231	GTAGTGACATTTATGTCACTACTTTTTTG	ATGACGACACAAATCATTAACAATTTTAACTCACTTAATTCCGAAGATCTTTCTACTGTTAAGGGTGGAGCATGTAGTTTTTGGGGAGCTACAGCTGCCGTAGGCGTCGGGGCTGTTGGAGGAGCCATTAAAGGTGGTATTCAAACAGGTACTTGGCAAGGTGCAGCCTTAAAGGGTATTGGTTATGGTATTAAAGATGGGATTACTTATGGCCTTATTTGTCGTTATTAG	MTTQIINNFNSLNSEDLSTVKGGACSFWGATAAVGVGAVGGAIKGGIQTGTWQGAALKGIGYGIKDGITYGLICRY*	MTTQIINNFNSLNSEDLSTVKGG	ACSFWGATAAVGVGAVGGAIKGGIQTGTWQGAALKGIGYGIKDGITYGLICRY*	23	54	0.524528	5203.67	9.26645	2.93663
BIOML-A32	1736560	1736739	180	GTGGTGACATTTATGTCACTACTTTTTTG	ATGACAACACAAACAATGAACACTTTTGAAACACTCGATCTCGAGACACTTGCAAACGTTGAAGGTGGCGGATGGGTTAAGTGTTATGCCGGCACAATTGGCTCTGCTCTAGTAGGATCAGCAGGAGGCCCGGTAGGTTACTGGGGAGGAGCTTTAGTTGGCTATGCTACATTCTGCTAA	MTTQTMNTFETLDLETLANVEGGGWVKCYAGTIGSALVGSAGGPVGYWGGALVGYATFC*	MTTQTMNTFETLDLETLANVEGG	GWVKCYAGTIGSALVGSAGGPVGYWGGALVGYATFC*	23	37	0.763889	3494.68	8.2049	0.936154
BIOML-A32	1736575	1736739	165	GTGGTGACATTTATGTCACTACTTTTTTG	ATGAACACTTTTGAAACACTCGATCTCGAGACACTTGCAAACGTTGAAGGTGGCGGATGGGTTAAGTGTTATGCCGGCACAATTGGCTCTGCTCTAGTAGGATCAGCAGGAGGCCCGGTAGGTTACTGGGGAGGAGCTTTAGTTGGCTATGCTACATTCTGCTAA	MNTFETLDLETLANVEGGGWVKCYAGTIGSALVGSAGGPVGYWGGALVGYATFC*	MNTFETLDLETLANVEGG	GWVKCYAGTIGSALVGSAGGPVGYWGGALVGYATFC*	18	37	0.763889	3494.68	8.2049	0.936154
BIOML-A33	150581	150748	168	ATGGTGACATTTATGTCACTACTTTTTTA	ATGACTAAGACCATTAACAATCGTAAAAACATGACTACTCAAGAACTTGAAGCTGTATCAGGTGGAGTGGTTCCTTGGGCCGCTATTTCTGTTGGCATTGCTGCTGCAAAACTGACTTATGACCTTAGCTATGCTGCAGGTAAGTCTTTCTATAACCTCACCCACTAA	MTKTINNRKNMTTQELEAVSGGVVPWAAISVGIAAAKLTYDLSYAAGKSFYNLTH*	MTKTINNRKNMTTQELEAVSGG	VVPWAAISVGIAAAKLTYDLSYAAGKSFYNLTH*	22	34	0.587879	3496.84	9.03496	1.23835
BIOML-A33	150397	150561	165	ATGGTGACATTTATGTCACTACTTTTTTA	ATGACAGTGATTAACAAAGAAATGAAGGCAGCTGACCTAGCCTCAGTAACAGGAGGCGGATGGAAGACTAACCTTGCCATTGGAGGGCTCTGCCTAGCTTCAAGACCTATTGGAACTATGGTATGCCTTGGAGCCTACAATGGCTACATGGACTCTGCGCGATAA	MTVINKEMKAADLASVTGGGWKTNLAIGGLCLASRPIGTMVCLGAYNGYMDSAR*	MTVINKEMKAADLASVTGG	GWKTNLAIGGLCLASRPIGTMVCLGAYNGYMDSAR*	19	36	0.3	3658.79	8.77177	1.93773
BIOML-A33	150403	150561	159	ATGGTGACATTTATGTCACTACTTTTTTA	GTGATTAACAAAGAAATGAAGGCAGCTGACCTAGCCTCAGTAACAGGAGGCGGATGGAAGACTAACCTTGCCATTGGAGGGCTCTGCCTAGCTTCAAGACCTATTGGAACTATGGTATGCCTTGGAGCCTACAATGGCTACATGGACTCTGCGCGATAA	VINKEMKAADLASVTGGGWKTNLAIGGLCLASRPIGTMVCLGAYNGYMDSAR*	VINKEMKAADLASVTGG	GWKTNLAIGGLCLASRPIGTMVCLGAYNGYMDSAR*	17	36	0.3	3658.79	8.77177	1.93773
BIOML-A33	1635387	1635536	150	GTAGTGACATTTATGTCACTATTTTTTTG	ATGCGAACTAAGGTATATGGTGAAGAGCTCAATGCTGAAAGCTTAGAAAATGTTACAGGGGGTGGTTTTGTATCTAAACCTCAAACCTTACCTGAACGATTGGGTTGGAACAAATGGTGGTTGAAAAGAAGACCTCCTTATGGCGATTAG	MRTKVYGEELNAESLENVTGGGFVSKPQTLPERLGWNKWWLKRRPPYGD*	MRTKVYGEELNAESLENVTGG	GFVSKPQTLPERLGWNKWWLKRRPPYGD*	21	29	-1.21071	3410.82	11.0904	4.00077
BIOML-A33	1701544	1701774	231	GTAGTGACATTTATGTCACTACTTTTTTG	ATGACGACACAAATCATTAACAATTTTAACTCACTTAATTCCGAAGATCTTTCTACTGTTAAGGGTGGAGCATGTAGTTTTTGGGGAGCTACAGCTGCCGTAGGCGTCGGGGCTGTTGGAGGAGCCATTAAAGGTGGTATTCAAACAGGTACTTGGCAAGGTGCAGCCTTAAAGGGTATTGGTTATGGTATTAAAGATGGGATTACTTATGGCCTTATTTGTCGTTATTAG	MTTQIINNFNSLNSEDLSTVKGGACSFWGATAAVGVGAVGGAIKGGIQTGTWQGAALKGIGYGIKDGITYGLICRY*	MTTQIINNFNSLNSEDLSTVKGG	ACSFWGATAAVGVGAVGGAIKGGIQTGTWQGAALKGIGYGIKDGITYGLICRY*	23	54	0.524528	5203.67	9.26645	2.93663
BIOML-A33	1710157	1710336	180	GTGGTGACATTTATGTCACTACTTTTTTG	ATGACAACACAAACAATGAACACTTTTGAAACACTCGATCTCGAGACACTTGCAAACGTTGAAGGTGGCGGATGGGTTAAGTGTTATGCCGGCACAATTGGCTCTGCTCTAGTAGGATCAGCAGGAGGCCCGGTAGGTTACTGGGGAGGAGCTTTAGTTGGCTATGCTACATTCTGCTAA	MTTQTMNTFETLDLETLANVEGGGWVKCYAGTIGSALVGSAGGPVGYWGGALVGYATFC*	MTTQTMNTFETLDLETLANVEGG	GWVKCYAGTIGSALVGSAGGPVGYWGGALVGYATFC*	23	37	0.763889	3494.68	8.2049	0.936154
BIOML-A33	1710172	1710336	165	GTGGTGACATTTATGTCACTACTTTTTTG	ATGAACACTTTTGAAACACTCGATCTCGAGACACTTGCAAACGTTGAAGGTGGCGGATGGGTTAAGTGTTATGCCGGCACAATTGGCTCTGCTCTAGTAGGATCAGCAGGAGGCCCGGTAGGTTACTGGGGAGGAGCTTTAGTTGGCTATGCTACATTCTGCTAA	MNTFETLDLETLANVEGGGWVKCYAGTIGSALVGSAGGPVGYWGGALVGYATFC*	MNTFETLDLETLANVEGG	GWVKCYAGTIGSALVGSAGGPVGYWGGALVGYATFC*	18	37	0.763889	3494.68	8.2049	0.936154
BIOML-A34	35798	35965	168	ATGGTGACATTTATGTCACTACTTTTTTA	ATGACTAAGACCATTAACAATCGTAAAAACATGACTACTCAAGAACTTGAAGCTGTATCAGGTGGAGTGGTTCCTTGGGCCGCTATTTCTGTTGGCATTGCTGCTGCAAAACTGACTTATGACCTTAGCTATGCTGCAGGTAAGTCTTTCTATAACCTCACCCACTAA	MTKTINNRKNMTTQELEAVSGGVVPWAAISVGIAAAKLTYDLSYAAGKSFYNLTH*	MTKTINNRKNMTTQELEAVSGG	VVPWAAISVGIAAAKLTYDLSYAAGKSFYNLTH*	22	34	0.587879	3496.84	9.03496	1.23835
BIOML-A34	35614	35778	165	ATGGTGACATTTATGTCACTACTTTTTTA	ATGACAGTGATTAACAAAGAAATGAAGGCAGCTGACCTAGCCTCAGTAACAGGAGGCGGATGGAAGACTAACCTTGCCATTGGAGGGCTCTGCCTAGCTTCAAGACCTATTGGAACTATGGTATGCCTTGGAGCCTACAATGGCTACATGGACTCTGCGCGATAA	MTVINKEMKAADLASVTGGGWKTNLAIGGLCLASRPIGTMVCLGAYNGYMDSAR*	MTVINKEMKAADLASVTGG	GWKTNLAIGGLCLASRPIGTMVCLGAYNGYMDSAR*	19	36	0.3	3658.79	8.77177	1.93773
BIOML-A34	35620	35778	159	ATGGTGACATTTATGTCACTACTTTTTTA	GTGATTAACAAAGAAATGAAGGCAGCTGACCTAGCCTCAGTAACAGGAGGCGGATGGAAGACTAACCTTGCCATTGGAGGGCTCTGCCTAGCTTCAAGACCTATTGGAACTATGGTATGCCTTGGAGCCTACAATGGCTACATGGACTCTGCGCGATAA	VINKEMKAADLASVTGGGWKTNLAIGGLCLASRPIGTMVCLGAYNGYMDSAR*	VINKEMKAADLASVTGG	GWKTNLAIGGLCLASRPIGTMVCLGAYNGYMDSAR*	17	36	0.3	3658.79	8.77177	1.93773
BIOML-A34	1670289	1670438	150	GTAGTGACATTTATGTCACTATTTTTTTG	ATGCGAACTAAGGTATATGGTGAAGAGCTCAATGCTGAAAGCTTAGAAAATGTTACAGGGGGTGGTTTTGTATCTAAACCTCAAACCTTACCTGAACGATTGGGTTGGAACAAATGGTGGTTGAAAAGAAGACCTCCTTATGGCGATTAG	MRTKVYGEELNAESLENVTGGGFVSKPQTLPERLGWNKWWLKRRPPYGD*	MRTKVYGEELNAESLENVTGG	GFVSKPQTLPERLGWNKWWLKRRPPYGD*	21	29	-1.21071	3410.82	11.0904	4.00077
BIOML-A34	1736446	1736676	231	GTAGTGACATTTATGTCACTACTTTTTTG	ATGACGACACAAATCATTAACAATTTTAACTCACTTAATTCCGAAGATCTTTCTACTGTTAAGGGTGGAGCATGTAGTTTTTGGGGAGCTACAGCTGCCGTAGGCGTCGGGGCTGTTGGAGGAGCCATTAAAGGTGGTATTCAAACAGGTACTTGGCAAGGTGCAGCCTTAAAGGGTATTGGTTATGGTATTAAAGATGGGATTACTTATGGCCTTATTTGTCGTTATTAG	MTTQIINNFNSLNSEDLSTVKGGACSFWGATAAVGVGAVGGAIKGGIQTGTWQGAALKGIGYGIKDGITYGLICRY*	MTTQIINNFNSLNSEDLSTVKGG	ACSFWGATAAVGVGAVGGAIKGGIQTGTWQGAALKGIGYGIKDGITYGLICRY*	23	54	0.524528	5203.67	9.26645	2.93663
BIOML-A34	1745059	1745238	180	GTGGTGACATTTATGTCACTACTTTTTTG	ATGACAACACAAACAATGAACACTTTTGAAACACTCGATCTCGAGACACTTGCAAACGTTGAAGGTGGCGGATGGGTTAAGTGTTATGCCGGCACAATTGGCTCTGCTCTAGTAGGATCAGCAGGAGGCCCGGTAGGTTACTGGGGAGGAGCTTTAGTTGGCTATGCTACATTCTGCTAA	MTTQTMNTFETLDLETLANVEGGGWVKCYAGTIGSALVGSAGGPVGYWGGALVGYATFC*	MTTQTMNTFETLDLETLANVEGG	GWVKCYAGTIGSALVGSAGGPVGYWGGALVGYATFC*	23	37	0.763889	3494.68	8.2049	0.936154
BIOML-A34	1745074	1745238	165	GTGGTGACATTTATGTCACTACTTTTTTG	ATGAACACTTTTGAAACACTCGATCTCGAGACACTTGCAAACGTTGAAGGTGGCGGATGGGTTAAGTGTTATGCCGGCACAATTGGCTCTGCTCTAGTAGGATCAGCAGGAGGCCCGGTAGGTTACTGGGGAGGAGCTTTAGTTGGCTATGCTACATTCTGCTAA	MNTFETLDLETLANVEGGGWVKCYAGTIGSALVGSAGGPVGYWGGALVGYATFC*	MNTFETLDLETLANVEGG	GWVKCYAGTIGSALVGSAGGPVGYWGGALVGYATFC*	18	37	0.763889	3494.68	8.2049	0.936154
BIOML-A35	35798	35965	168	ATGGTGACATTTATGTCACTACTTTTTTA	ATGACTAAGACCATTAACAATCGTAAAAACATGACTACTCAAGAACTTGAAGCTGTATCAGGTGGAGTGGTTCCTTGGGCCGCTATTTCTGTTGGCATTGCTGCTGCAAAACTGACTTATGACCTTAGCTATGCTGCAGGTAAGTCTTTCTATAACCTCACCCACTAA	MTKTINNRKNMTTQELEAVSGGVVPWAAISVGIAAAKLTYDLSYAAGKSFYNLTH*	MTKTINNRKNMTTQELEAVSGG	VVPWAAISVGIAAAKLTYDLSYAAGKSFYNLTH*	22	34	0.587879	3496.84	9.03496	1.23835
BIOML-A35	35614	35778	165	ATGGTGACATTTATGTCACTACTTTTTTA	ATGACAGTGATTAACAAAGAAATGAAGGCAGCTGACCTAGCCTCAGTAACAGGAGGCGGATGGAAGACTAACCTTGCCATTGGAGGGCTCTGCCTAGCTTCAAGACCTATTGGAACTATGGTATGCCTTGGAGCCTACAATGGCTACATGGACTCTGCGCGATAA	MTVINKEMKAADLASVTGGGWKTNLAIGGLCLASRPIGTMVCLGAYNGYMDSAR*	MTVINKEMKAADLASVTGG	GWKTNLAIGGLCLASRPIGTMVCLGAYNGYMDSAR*	19	36	0.3	3658.79	8.77177	1.93773
BIOML-A35	35620	35778	159	ATGGTGACATTTATGTCACTACTTTTTTA	GTGATTAACAAAGAAATGAAGGCAGCTGACCTAGCCTCAGTAACAGGAGGCGGATGGAAGACTAACCTTGCCATTGGAGGGCTCTGCCTAGCTTCAAGACCTATTGGAACTATGGTATGCCTTGGAGCCTACAATGGCTACATGGACTCTGCGCGATAA	VINKEMKAADLASVTGGGWKTNLAIGGLCLASRPIGTMVCLGAYNGYMDSAR*	VINKEMKAADLASVTGG	GWKTNLAIGGLCLASRPIGTMVCLGAYNGYMDSAR*	17	36	0.3	3658.79	8.77177	1.93773
BIOML-A35	279312	279461	150	GTAGTGACATTTATGTCACTATTTTTTTG	ATGCGAACTAAGGTATATGGTGAAGAGCTCAATGCTGAAAGCTTAGAAAATGTTACAGGGGGTGGTTTTGTATCTAAACCTCAAACCTTACCTGAACGATTGGGTTGGAACAAATGGTGGTTGAAAAGAAGACCTCCTTATGGCGATTAG	MRTKVYGEELNAESLENVTGGGFVSKPQTLPERLGWNKWWLKRRPPYGD*	MRTKVYGEELNAESLENVTGG	GFVSKPQTLPERLGWNKWWLKRRPPYGD*	21	29	-1.21071	3410.82	11.0904	4.00077
BIOML-A35	345469	345699	231	GTAGTGACATTTATGTCACTACTTTTTTG	ATGACGACACAAATCATTAACAATTTTAACTCACTTAATTCCGAAGATCTTTCTACTGTTAAGGGTGGAGCATGTAGTTTTTGGGGAGCTACAGCTGCCGTAGGCGTCGGGGCTGTTGGAGGAGCCATTAAAGGTGGTATTCAAACAGGTACTTGGCAAGGTGCAGCCTTAAAGGGTATTGGTTATGGTATTAAAGATGGGATTACTTATGGCCTTATTTGTCGTTATTAG	MTTQIINNFNSLNSEDLSTVKGGACSFWGATAAVGVGAVGGAIKGGIQTGTWQGAALKGIGYGIKDGITYGLICRY*	MTTQIINNFNSLNSEDLSTVKGG	ACSFWGATAAVGVGAVGGAIKGGIQTGTWQGAALKGIGYGIKDGITYGLICRY*	23	54	0.524528	5203.67	9.26645	2.93663
BIOML-A35	354082	354261	180	GTGGTGACATTTATGTCACTACTTTTTTG	ATGACAACACAAACAATGAACACTTTTGAAACACTCGATCTCGAGACACTTGCAAACGTTGAAGGTGGCGGATGGGTTAAGTGTTATGCCGGCACAATTGGCTCTGCTCTAGTAGGATCAGCAGGAGGCCCGGTAGGTTACTGGGGAGGAGCTTTAGTTGGCTATGCTACATTCTGCTAA	MTTQTMNTFETLDLETLANVEGGGWVKCYAGTIGSALVGSAGGPVGYWGGALVGYATFC*	MTTQTMNTFETLDLETLANVEGG	GWVKCYAGTIGSALVGSAGGPVGYWGGALVGYATFC*	23	37	0.763889	3494.68	8.2049	0.936154
BIOML-A35	354097	354261	165	GTGGTGACATTTATGTCACTACTTTTTTG	ATGAACACTTTTGAAACACTCGATCTCGAGACACTTGCAAACGTTGAAGGTGGCGGATGGGTTAAGTGTTATGCCGGCACAATTGGCTCTGCTCTAGTAGGATCAGCAGGAGGCCCGGTAGGTTACTGGGGAGGAGCTTTAGTTGGCTATGCTACATTCTGCTAA	MNTFETLDLETLANVEGGGWVKCYAGTIGSALVGSAGGPVGYWGGALVGYATFC*	MNTFETLDLETLANVEGG	GWVKCYAGTIGSALVGSAGGPVGYWGGALVGYATFC*	18	37	0.763889	3494.68	8.2049	0.936154
BIOML-A4	2195330	2195530	201	ATAGTGACATTTATGTCACTATTTTTTAT	TTGAAAACATTAGAAATGACACAACAAGTATTGACGCATGAGGAATTATCAGTGGTTGTAGGTGGTGGATGTAGTTGGAACAATGCAGCTAAGGCTGCCCTCGGAACAAGTATCACGGGTCTAATCACTAGTGGCCCAGGAGGAGCCTTGTTGGGATTAGCTGGAGGAGCAGTAAGTTACGGAGCGTTGTGTTGGGTATGA	LKTLEMTQQVLTHEELSVVVGGGCSWNNAAKAALGTSITGLITSGPGGALLGLAGGAVSYGALCWV*	LKTLEMTQQVLTHEELSVVVGG	GCSWNNAAKAALGTSITGLITSGPGGALLGLAGGAVSYGALCWV*	22	45	0.788636	4105.08	8.22118	0.937741
BIOML-A4	2195345	2195530	186	ATAGTGACATTTATGTCACTATTTTTTAT	ATGACACAACAAGTATTGACGCATGAGGAATTATCAGTGGTTGTAGGTGGTGGATGTAGTTGGAACAATGCAGCTAAGGCTGCCCTCGGAACAAGTATCACGGGTCTAATCACTAGTGGCCCAGGAGGAGCCTTGTTGGGATTAGCTGGAGGAGCAGTAAGTTACGGAGCGTTGTGTTGGGTATGA	MTQQVLTHEELSVVVGGGCSWNNAAKAALGTSITGLITSGPGGALLGLAGGAVSYGALCWV*	MTQQVLTHEELSVVVGG	GCSWNNAAKAALGTSITGLITSGPGGALLGLAGGAVSYGALCWV*	17	45	0.788636	4105.08	8.22118	0.937741
BIOML-A4	2206699	2206848	150	GTAGTGACATTTATGTCACTATTTTTTTG	ATGCGAACTAAGGCATATGGTGAAGAGCTCAATGCTGAAACCTTAGAAAATGTTACAGGGGGTGGTTTTGTATCTAAACCTCAAACCTTACCTGAACGATTGGGTTGGAACAAATGGTGGTTGAAAAGAAGACCTCCTTATGGCGATTAG	MRTKAYGEELNAETLENVTGGGFVSKPQTLPERLGWNKWWLKRRPPYGD*	MRTKAYGEELNAETLENVTGG	GFVSKPQTLPERLGWNKWWLKRRPPYGD*	21	29	-1.21071	3410.82	11.0904	4.00077
BIOML-A4	2277068	2277301	234	GTGGTGACATACATGTCACTACTTTTTTG	ATGACAACACAAACAATGAACAATTTTGAAACACTCGATCTCGAGGCACTTGCAAACGTTGAAGGTGGAAATAGATGTAAAGATTTAATCTTTGGAGGAGCTTTAACTGGCGCAGGTGCTGGATTTACAGGTGGTATGGCAGCATTTGGTGTTACAGCATTTCCAGGAGCATTTGTAGGAGCACATGTTGGAGCAGTTGCTGGTGGGCTAGCATGTATCGGAGCGAGCTTTTAG	MTTQTMNNFETLDLEALANVEGGNRCKDLIFGGALTGAGAGFTGGMAAFGVTAFPGAFVGAHVGAVAGGLACIGASF*	MTTQTMNNFETLDLEALANVEGG	NRCKDLIFGGALTGAGAGFTGGMAAFGVTAFPGAFVGAHVGAVAGGLACIGASF*	23	55	0.996296	4987.47	8.24126	1.17958
BIOML-A4	2277083	2277301	219	GTGGTGACATACATGTCACTACTTTTTTG	ATGAACAATTTTGAAACACTCGATCTCGAGGCACTTGCAAACGTTGAAGGTGGAAATAGATGTAAAGATTTAATCTTTGGAGGAGCTTTAACTGGCGCAGGTGCTGGATTTACAGGTGGTATGGCAGCATTTGGTGTTACAGCATTTCCAGGAGCATTTGTAGGAGCACATGTTGGAGCAGTTGCTGGTGGGCTAGCATGTATCGGAGCGAGCTTTTAG	MNNFETLDLEALANVEGGNRCKDLIFGGALTGAGAGFTGGMAAFGVTAFPGAFVGAHVGAVAGGLACIGASF*	MNNFETLDLEALANVEGG	NRCKDLIFGGALTGAGAGFTGGMAAFGVTAFPGAFVGAHVGAVAGGLACIGASF*	18	55	0.996296	4987.47	8.24126	1.17958
BIOML-A4	2277314	2277502	189	GTGGTGACATACATGTCACTACTTTTTTG	ATGAATGTGACTAAGTATAATAAGATGTGCGATGCTGAGCTAGAAATTATTTCTGGTGGTGGGAAAGTTGGAGCAGTAATTGGTGGCTGTCTAGGTGGTATGCTCATGGCATGGGCAGCAGGACCTGTTTCCGCAGGGGGTTATACTATGATATGTGCTACTTCGGGGCTTGCAAATGCTTATTTTTGA	MNVTKYNKMCDAELEIISGGGKVGAVIGGCLGGMLMAWAAGPVSAGGYTMICATSGLANAYF*	MNVTKYNKMCDAELEIISGG	GKVGAVIGGCLGGMLMAWAAGPVSAGGYTMICATSGLANAYF*	20	43	0.985714	3992.91	8.21291	0.936947
BIOML-A4	2277320	2277502	183	GTGGTGACATACATGTCACTACTTTTTTG	GTGACTAAGTATAATAAGATGTGCGATGCTGAGCTAGAAATTATTTCTGGTGGTGGGAAAGTTGGAGCAGTAATTGGTGGCTGTCTAGGTGGTATGCTCATGGCATGGGCAGCAGGACCTGTTTCCGCAGGGGGTTATACTATGATATGTGCTACTTCGGGGCTTGCAAATGCTTATTTTTGA	VTKYNKMCDAELEIISGGGKVGAVIGGCLGGMLMAWAAGPVSAGGYTMICATSGLANAYF*	VTKYNKMCDAELEIISGG	GKVGAVIGGCLGGMLMAWAAGPVSAGGYTMICATSGLANAYF*	18	43	0.985714	3992.91	8.21291	0.936947
BIOML-A4	750220	750387	168	ATAGTGACATTTATGTCACTACTTTTTTA	ATGACTAAGACAATTAACAATCGTAAACACATGACTACTCAAGAACTTGAAGCTATATCAGGTGGAGTGGTTCCCTGGGTGGCTATTTCTGTTGGCATGGCTGCTGCAAAACTGACTTATGACCTTAGCTATACTGCGGGTAAATCTTTCTATAACCTCACCCACTAA	MTKTINNRKHMTTQELEAISGGVVPWVAISVGMAAAKLTYDLSYTAGKSFYNLTH*	MTKTINNRKHMTTQELEAISGG	VVPWVAISVGMAAAKLTYDLSYTAGKSFYNLTH*	22	34	0.506061	3572.84	9.03496	1.23835
BIOML-A4	750035	750199	165	ATAGTGACATTTATGTCACTACTTTTTTA	ATGACAATGATTAACAAAGAAATGAACACCACTGATCTAGCTACAGTAACAGGAGGCGGATGGAAGACCAACCTTGCCATTGGAGGGCTCTGCCTAGCTTCAGGACCTATTGGAACTATGATTTGCCTTGGTGCCTACAACGGCTACATGGACTCTGCACGATAA	MTMINKEMNTTDLATVTGGGWKTNLAIGGLCLASGPIGTMICLGAYNGYMDSAR*	MTMINKEMNTTDLATVTGG	GWKTNLAIGGLCLASGPIGTMICLGAYNGYMDSAR*	19	36	0.425714	3573.72	8.21289	0.937738
BIOML-A4	750041	750199	159	ATAGTGACATTTATGTCACTACTTTTTTA	ATGATTAACAAAGAAATGAACACCACTGATCTAGCTACAGTAACAGGAGGCGGATGGAAGACCAACCTTGCCATTGGAGGGCTCTGCCTAGCTTCAGGACCTATTGGAACTATGATTTGCCTTGGTGCCTACAACGGCTACATGGACTCTGCACGATAA	MINKEMNTTDLATVTGGGWKTNLAIGGLCLASGPIGTMICLGAYNGYMDSAR*	MINKEMNTTDLATVTGG	GWKTNLAIGGLCLASGPIGTMICLGAYNGYMDSAR*	17	36	0.425714	3573.72	8.21289	0.937738
BIOML-A5	2088853	2089053	201	ATAGTGACATTTATGTCACTATTTTTTAT	TTGAAAACATTAGAAATGACACAACAAGTATTGACGCATGAGGAATTATCAGTGGTTGTAGGTGGTGGATGTAGTTGGAACAATGCAGCTAAGGCTGCCCTCGGAACAAGTATCACGGGTCTAATCACTAGTGGCCCAGGAGGAGCCTTGTTGGGATTAGCTGGAGGAGCAGTAAGTTACGGAGCGTTGTGTTGGGTATGA	LKTLEMTQQVLTHEELSVVVGGGCSWNNAAKAALGTSITGLITSGPGGALLGLAGGAVSYGALCWV*	LKTLEMTQQVLTHEELSVVVGG	GCSWNNAAKAALGTSITGLITSGPGGALLGLAGGAVSYGALCWV*	22	45	0.788636	4105.08	8.22118	0.937741
BIOML-A5	2088868	2089053	186	ATAGTGACATTTATGTCACTATTTTTTAT	ATGACACAACAAGTATTGACGCATGAGGAATTATCAGTGGTTGTAGGTGGTGGATGTAGTTGGAACAATGCAGCTAAGGCTGCCCTCGGAACAAGTATCACGGGTCTAATCACTAGTGGCCCAGGAGGAGCCTTGTTGGGATTAGCTGGAGGAGCAGTAAGTTACGGAGCGTTGTGTTGGGTATGA	MTQQVLTHEELSVVVGGGCSWNNAAKAALGTSITGLITSGPGGALLGLAGGAVSYGALCWV*	MTQQVLTHEELSVVVGG	GCSWNNAAKAALGTSITGLITSGPGGALLGLAGGAVSYGALCWV*	17	45	0.788636	4105.08	8.22118	0.937741
BIOML-A5	2100222	2100371	150	GTAGTGACATTTATGTCACTATTTTTTTG	ATGCGAACTAAGGCATATGGTGAAGAGCTCAATGCTGAAACCTTAGAAAATGTTACAGGGGGTGGTTTTGTATCTAAACCTCAAACCTTACCTGAACGATTGGGTTGGAACAAATGGTGGTTGAAAAGAAGACCTCCTTATGGCGATTAG	MRTKAYGEELNAETLENVTGGGFVSKPQTLPERLGWNKWWLKRRPPYGD*	MRTKAYGEELNAETLENVTGG	GFVSKPQTLPERLGWNKWWLKRRPPYGD*	21	29	-1.21071	3410.82	11.0904	4.00077
BIOML-A5	2170590	2170823	234	GTGGTGACATACATGTCACTACTTTTTTG	ATGACAACACAAACAATGAACAATTTTGAAACACTCGATCTCGAGGCACTTGCAAACGTTGAAGGTGGAAATAGATGTAAAGATTTAATCTTTGGAGGAGCTTTAACTGGCGCAGGTGCTGGATTTACAGGTGGTATGGCAGCATTTGGTGTTACAGCATTTCCAGGAGCATTTGTAGGAGCACATGTTGGAGCAGTTGCTGGTGGGCTAGCATGTATCGGAGCGAGCTTTTAG	MTTQTMNNFETLDLEALANVEGGNRCKDLIFGGALTGAGAGFTGGMAAFGVTAFPGAFVGAHVGAVAGGLACIGASF*	MTTQTMNNFETLDLEALANVEGG	NRCKDLIFGGALTGAGAGFTGGMAAFGVTAFPGAFVGAHVGAVAGGLACIGASF*	23	55	0.996296	4987.47	8.24126	1.17958
BIOML-A5	2170605	2170823	219	GTGGTGACATACATGTCACTACTTTTTTG	ATGAACAATTTTGAAACACTCGATCTCGAGGCACTTGCAAACGTTGAAGGTGGAAATAGATGTAAAGATTTAATCTTTGGAGGAGCTTTAACTGGCGCAGGTGCTGGATTTACAGGTGGTATGGCAGCATTTGGTGTTACAGCATTTCCAGGAGCATTTGTAGGAGCACATGTTGGAGCAGTTGCTGGTGGGCTAGCATGTATCGGAGCGAGCTTTTAG	MNNFETLDLEALANVEGGNRCKDLIFGGALTGAGAGFTGGMAAFGVTAFPGAFVGAHVGAVAGGLACIGASF*	MNNFETLDLEALANVEGG	NRCKDLIFGGALTGAGAGFTGGMAAFGVTAFPGAFVGAHVGAVAGGLACIGASF*	18	55	0.996296	4987.47	8.24126	1.17958
BIOML-A5	2170836	2171024	189	GTGGTGACATACATGTCACTACTTTTTTG	ATGAATGTGACTAAGTATAATAAGATGTGCGATGCTGAGCTAGAAATTATTTCTGGTGGTGGGAAAGTTGGAGCAGTAATTGGTGGCTGTCTAGGTGGTATGCTCATGGCATGGGCAGCAGGACCTGTTTCCGCAGGGGGTTATACTATGATATGTGCTACTTCGGGGCTTGCAAATGCTTATTTTTGA	MNVTKYNKMCDAELEIISGGGKVGAVIGGCLGGMLMAWAAGPVSAGGYTMICATSGLANAYF*	MNVTKYNKMCDAELEIISGG	GKVGAVIGGCLGGMLMAWAAGPVSAGGYTMICATSGLANAYF*	20	43	0.985714	3992.91	8.21291	0.936947
BIOML-A5	2170842	2171024	183	GTGGTGACATACATGTCACTACTTTTTTG	GTGACTAAGTATAATAAGATGTGCGATGCTGAGCTAGAAATTATTTCTGGTGGTGGGAAAGTTGGAGCAGTAATTGGTGGCTGTCTAGGTGGTATGCTCATGGCATGGGCAGCAGGACCTGTTTCCGCAGGGGGTTATACTATGATATGTGCTACTTCGGGGCTTGCAAATGCTTATTTTTGA	VTKYNKMCDAELEIISGGGKVGAVIGGCLGGMLMAWAAGPVSAGGYTMICATSGLANAYF*	VTKYNKMCDAELEIISGG	GKVGAVIGGCLGGMLMAWAAGPVSAGGYTMICATSGLANAYF*	18	43	0.985714	3992.91	8.21291	0.936947
BIOML-A5	600470	600637	168	ATAGTGACATTTATGTCACTACTTTTTTA	ATGACTAAGACAATTAACAATCGTAAACACATGACTACTCAAGAACTTGAAGCTATATCAGGTGGAGTGGTTCCCTGGGTGGCTATTTCTGTTGGCATGGCTGCTGCAAAACTGACTTATGACCTTAGCTATACTGCGGGTAAATCTTTCTATAACCTCACCCACTAA	MTKTINNRKHMTTQELEAISGGVVPWVAISVGMAAAKLTYDLSYTAGKSFYNLTH*	MTKTINNRKHMTTQELEAISGG	VVPWVAISVGMAAAKLTYDLSYTAGKSFYNLTH*	22	34	0.506061	3572.84	9.03496	1.23835
BIOML-A5	600285	600449	165	ATAGTGACATTTATGTCACTACTTTTTTA	ATGACAATGATTAACAAAGAAATGAACACCACTGATCTAGCTACAGTAACAGGAGGCGGATGGAAGACCAACCTTGCCATTGGAGGGCTCTGCCTAGCTTCAGGACCTATTGGAACTATGATTTGCCTTGGTGCCTACAACGGCTACATGGACTCTGCACGATAA	MTMINKEMNTTDLATVTGGGWKTNLAIGGLCLASGPIGTMICLGAYNGYMDSAR*	MTMINKEMNTTDLATVTGG	GWKTNLAIGGLCLASGPIGTMICLGAYNGYMDSAR*	19	36	0.425714	3573.72	8.21289	0.937738
BIOML-A5	600291	600449	159	ATAGTGACATTTATGTCACTACTTTTTTA	ATGATTAACAAAGAAATGAACACCACTGATCTAGCTACAGTAACAGGAGGCGGATGGAAGACCAACCTTGCCATTGGAGGGCTCTGCCTAGCTTCAGGACCTATTGGAACTATGATTTGCCTTGGTGCCTACAACGGCTACATGGACTCTGCACGATAA	MINKEMNTTDLATVTGGGWKTNLAIGGLCLASGPIGTMICLGAYNGYMDSAR*	MINKEMNTTDLATVTGG	GWKTNLAIGGLCLASGPIGTMICLGAYNGYMDSAR*	17	36	0.425714	3573.72	8.21289	0.937738
BIOML-A6	340609	340776	168	ATGGTGACATTTATGTCACTACTTTTTTA	ATGACTAAGACCATTAACAATCGTAAAAACATGACTACTCAAGAACTTGAAGCTGTATCAGGTGGAGTGGTTCCTTGGGCCGCTATTTCTGTTGGCATTGCTGCTGCAAAACTGACTTATGACCTTAGCTATGCTGCAGGTAAGTCTTTCTATAACCTCACCCACTAA	MTKTINNRKNMTTQELEAVSGGVVPWAAISVGIAAAKLTYDLSYAAGKSFYNLTH*	MTKTINNRKNMTTQELEAVSGG	VVPWAAISVGIAAAKLTYDLSYAAGKSFYNLTH*	22	34	0.587879	3496.84	9.03496	1.23835
BIOML-A6	340425	340589	165	ATGGTGACATTTATGTCACTACTTTTTTA	ATGACAATGATTAATAAAGAAATGAAGGCAGCTGACCTAGCCTCAGTAACAGGAGGCGGATGGAAGACTAACCTTGCCATTGGAGGGCTCTGCCTAGCTTCAGGACCTATTGGAACTATGATGTGCCTTGGAGCCTACAATGGCTACATGGACTCTGCGCGATAA	MTMINKEMKAADLASVTGGGWKTNLAIGGLCLASGPIGTMMCLGAYNGYMDSAR*	MTMINKEMKAADLASVTGG	GWKTNLAIGGLCLASGPIGTMMCLGAYNGYMDSAR*	19	36	0.351429	3591.68	8.21289	0.937738
BIOML-A6	340431	340589	159	ATGGTGACATTTATGTCACTACTTTTTTA	ATGATTAATAAAGAAATGAAGGCAGCTGACCTAGCCTCAGTAACAGGAGGCGGATGGAAGACTAACCTTGCCATTGGAGGGCTCTGCCTAGCTTCAGGACCTATTGGAACTATGATGTGCCTTGGAGCCTACAATGGCTACATGGACTCTGCGCGATAA	MINKEMKAADLASVTGGGWKTNLAIGGLCLASGPIGTMMCLGAYNGYMDSAR*	MINKEMKAADLASVTGG	GWKTNLAIGGLCLASGPIGTMMCLGAYNGYMDSAR*	17	36	0.351429	3591.68	8.21289	0.937738
BIOML-A6	830502	830696	195	ATGGTGACATTTATGTCACTATTTTTTGT	ATGGTATTGAATTTAGAAAATGTAAACTGTGTTACTCTTCAAGATGAAGAATTGATGATGGTTAACGGAGGTCTTGCACCGATTGTAATTGGTGGAGTTGTCGTAGGTTGGAAGGTCATTGGTGGCGTTGCAGGTGTTATAGCAGCAAGTGGTGCTGCAGGGATTGCAGCAGGTTATTATGCTAATCGTCCTTAA	MVLNLENVNCVTLQDEELMMVNGGLAPIVIGGVVVGWKVIGGVAGVIAASGAAGIAAGYYANRP*	MVLNLENVNCVTLQDEELMMVNGG	LAPIVIGGVVVGWKVIGGVAGVIAASGAAGIAAGYYANRP*	24	41	1.2225	3734.1	10.0086	1.99825
BIOML-A6	830508	830696	189	ATGGTGACATTTATGTCACTATTTTTTGT	TTGAATTTAGAAAATGTAAACTGTGTTACTCTTCAAGATGAAGAATTGATGATGGTTAACGGAGGTCTTGCACCGATTGTAATTGGTGGAGTTGTCGTAGGTTGGAAGGTCATTGGTGGCGTTGCAGGTGTTATAGCAGCAAGTGGTGCTGCAGGGATTGCAGCAGGTTATTATGCTAATCGTCCTTAA	LNLENVNCVTLQDEELMMVNGGLAPIVIGGVVVGWKVIGGVAGVIAASGAAGIAAGYYANRP*	LNLENVNCVTLQDEELMMVNGG	LAPIVIGGVVVGWKVIGGVAGVIAASGAAGIAAGYYANRP*	22	41	1.2225	3734.1	10.0086	1.99825
BIOML-A6	830916	831071	156	ATGGTGACATTTATGTCACTATTTTTTGT	ATGTCTAAAAAATATGAGTTGAGTAAAAAAGAATTACAGGAAATTCAAGGAGGTGTTGCACCAATTATGGTTGCTATTGGTTTAGGAAGTCTAGCAGTAGCATCATTTAGTTCAGGATATAAATTTGGAACAGATTTAGCTAGACGTGGACGATAG	MSKKYELSKKELQEIQGGVAPIMVAIGLGSLAVASFSSGYKFGTDLARRGR*	MSKKYELSKKELQEIQGG	VAPIMVAIGLGSLAVASFSSGYKFGTDLARRGR*	18	34	0.6	3366.82	11.4308	2.99983
BIOML-A6	1390660	1390818	159	ATAGTGACATTTATGTCACTATTTTTTTG	ATGTATATGGATACAATGATGATGGATAAATTTGATTCTTTAACCTTTGATAAGCTTTCTGAAATTGTTGGGGGAAATGTAGCATATGACATTGGTTATGGAGTTGGACAAGTAAGTTATATTGCAGTTGAGATTTTAAAACTGAGAAAAATAAGATAG	MYMDTMMMDKFDSLTFDKLSEIVGGNVAYDIGYGVGQVSYIAVEILKLRKIR*	MYMDTMMMDKFDSLTFDKLSEIVGG	NVAYDIGYGVGQVSYIAVEILKLRKIR*	25	28	0.344444	3036.71	9.73602	1.99935
BIOML-A6	1390666	1390818	153	ATAGTGACATTTATGTCACTATTTTTTTG	ATGGATACAATGATGATGGATAAATTTGATTCTTTAACCTTTGATAAGCTTTCTGAAATTGTTGGGGGAAATGTAGCATATGACATTGGTTATGGAGTTGGACAAGTAAGTTATATTGCAGTTGAGATTTTAAAACTGAGAAAAATAAGATAG	MDTMMMDKFDSLTFDKLSEIVGGNVAYDIGYGVGQVSYIAVEILKLRKIR*	MDTMMMDKFDSLTFDKLSEIVGG	NVAYDIGYGVGQVSYIAVEILKLRKIR*	23	28	0.344444	3036.71	9.73602	1.99935
BIOML-A6	1389741	1389890	150	ATAGTGACATTTATGTCACTATTTTTTTG	ATGCGAACTAAGGCATATGGCGAAGAGCTCACTGCTGAAACCTTAGAAAATGTCACAGGGGGTGATTTTGTATCTAGACCTCAAACCTTACCTGAACGATTGGGTTGGAATAGATGGTGGTTGAAAAGAAAATACCCTTATGGTGATTAG	MRTKAYGEELTAETLENVTGGDFVSRPQTLPERLGWNRWWLKRKYPYGD*	MRTKAYGEELTAETLENVTGG	DFVSRPQTLPERLGWNRWWLKRKYPYGD*	21	29	-1.33214	3562.84	10.4397	3.00093
BIOML-A6	1390504	1390653	150	ATAGTGACATTTATGTCACTATTTTTTTG	ATGAAAAATACATTTCAAAAAATTGATATTAAAGATTTAGCAATTGTAGTTGGTGGAAGTATTTACTCATCTGTAGGATATGGAGTCGGAGTAGTTACTCACACGGTTTATGATTTTGGTCGTGGATTTGTAGATGGATTTAGAGGTTAA	MKNTFQKIDIKDLAIVVGGSIYSSVGYGVGVVTHTVYDFGRGFVDGFRG*	MKNTFQKIDIKDLAIVVGG	SIYSSVGYGVGVVTHTVYDFGRGFVDGFRG*	19	31	0.28	3197.56	7.52846	0.239453
BIOML-A6	1390675	1390818	144	ATAGTGACATTTATGTCACTATTTTTTTG	ATGATGATGGATAAATTTGATTCTTTAACCTTTGATAAGCTTTCTGAAATTGTTGGGGGAAATGTAGCATATGACATTGGTTATGGAGTTGGACAAGTAAGTTATATTGCAGTTGAGATTTTAAAACTGAGAAAAATAAGATAG	MMMDKFDSLTFDKLSEIVGGNVAYDIGYGVGQVSYIAVEILKLRKIR*	MMMDKFDSLTFDKLSEIVGG	NVAYDIGYGVGQVSYIAVEILKLRKIR*	20	28	0.344444	3036.71	9.73602	1.99935
BIOML-A6	1390678	1390818	141	ATAGTGACATTTATGTCACTATTTTTTTG	ATGATGGATAAATTTGATTCTTTAACCTTTGATAAGCTTTCTGAAATTGTTGGGGGAAATGTAGCATATGACATTGGTTATGGAGTTGGACAAGTAAGTTATATTGCAGTTGAGATTTTAAAACTGAGAAAAATAAGATAG	MMDKFDSLTFDKLSEIVGGNVAYDIGYGVGQVSYIAVEILKLRKIR*	MMDKFDSLTFDKLSEIVGG	NVAYDIGYGVGQVSYIAVEILKLRKIR*	19	28	0.344444	3036.71	9.73602	1.99935
BIOML-A6	1390681	1390818	138	ATAGTGACATTTATGTCACTATTTTTTTG	ATGGATAAATTTGATTCTTTAACCTTTGATAAGCTTTCTGAAATTGTTGGGGGAAATGTAGCATATGACATTGGTTATGGAGTTGGACAAGTAAGTTATATTGCAGTTGAGATTTTAAAACTGAGAAAAATAAGATAG	MDKFDSLTFDKLSEIVGGNVAYDIGYGVGQVSYIAVEILKLRKIR*	MDKFDSLTFDKLSEIVGG	NVAYDIGYGVGQVSYIAVEILKLRKIR*	18	28	0.344444	3036.71	9.73602	1.99935
BIOML-A6	1390660	1390818	159	ATGGTGACATCTATGTCACTATTTTTTAT	ATGTATATGGATACAATGATGATGGATAAATTTGATTCTTTAACCTTTGATAAGCTTTCTGAAATTGTTGGGGGAAATGTAGCATATGACATTGGTTATGGAGTTGGACAAGTAAGTTATATTGCAGTTGAGATTTTAAAACTGAGAAAAATAAGATAG	MYMDTMMMDKFDSLTFDKLSEIVGGNVAYDIGYGVGQVSYIAVEILKLRKIR*	MYMDTMMMDKFDSLTFDKLSEIVGG	NVAYDIGYGVGQVSYIAVEILKLRKIR*	25	28	0.344444	3036.71	9.73602	1.99935
BIOML-A6	1390666	1390818	153	ATGGTGACATCTATGTCACTATTTTTTAT	ATGGATACAATGATGATGGATAAATTTGATTCTTTAACCTTTGATAAGCTTTCTGAAATTGTTGGGGGAAATGTAGCATATGACATTGGTTATGGAGTTGGACAAGTAAGTTATATTGCAGTTGAGATTTTAAAACTGAGAAAAATAAGATAG	MDTMMMDKFDSLTFDKLSEIVGGNVAYDIGYGVGQVSYIAVEILKLRKIR*	MDTMMMDKFDSLTFDKLSEIVGG	NVAYDIGYGVGQVSYIAVEILKLRKIR*	23	28	0.344444	3036.71	9.73602	1.99935
BIOML-A6	1390504	1390653	150	ATGGTGACATCTATGTCACTATTTTTTAT	ATGAAAAATACATTTCAAAAAATTGATATTAAAGATTTAGCAATTGTAGTTGGTGGAAGTATTTACTCATCTGTAGGATATGGAGTCGGAGTAGTTACTCACACGGTTTATGATTTTGGTCGTGGATTTGTAGATGGATTTAGAGGTTAA	MKNTFQKIDIKDLAIVVGGSIYSSVGYGVGVVTHTVYDFGRGFVDGFRG*	MKNTFQKIDIKDLAIVVGG	SIYSSVGYGVGVVTHTVYDFGRGFVDGFRG*	19	31	0.28	3197.56	7.52846	0.239453
BIOML-A6	1390675	1390818	144	ATGGTGACATCTATGTCACTATTTTTTAT	ATGATGATGGATAAATTTGATTCTTTAACCTTTGATAAGCTTTCTGAAATTGTTGGGGGAAATGTAGCATATGACATTGGTTATGGAGTTGGACAAGTAAGTTATATTGCAGTTGAGATTTTAAAACTGAGAAAAATAAGATAG	MMMDKFDSLTFDKLSEIVGGNVAYDIGYGVGQVSYIAVEILKLRKIR*	MMMDKFDSLTFDKLSEIVGG	NVAYDIGYGVGQVSYIAVEILKLRKIR*	20	28	0.344444	3036.71	9.73602	1.99935
BIOML-A6	1390678	1390818	141	ATGGTGACATCTATGTCACTATTTTTTAT	ATGATGGATAAATTTGATTCTTTAACCTTTGATAAGCTTTCTGAAATTGTTGGGGGAAATGTAGCATATGACATTGGTTATGGAGTTGGACAAGTAAGTTATATTGCAGTTGAGATTTTAAAACTGAGAAAAATAAGATAG	MMDKFDSLTFDKLSEIVGGNVAYDIGYGVGQVSYIAVEILKLRKIR*	MMDKFDSLTFDKLSEIVGG	NVAYDIGYGVGQVSYIAVEILKLRKIR*	19	28	0.344444	3036.71	9.73602	1.99935
BIOML-A6	1390681	1390818	138	ATGGTGACATCTATGTCACTATTTTTTAT	ATGGATAAATTTGATTCTTTAACCTTTGATAAGCTTTCTGAAATTGTTGGGGGAAATGTAGCATATGACATTGGTTATGGAGTTGGACAAGTAAGTTATATTGCAGTTGAGATTTTAAAACTGAGAAAAATAAGATAG	MDKFDSLTFDKLSEIVGGNVAYDIGYGVGQVSYIAVEILKLRKIR*	MDKFDSLTFDKLSEIVGG	NVAYDIGYGVGQVSYIAVEILKLRKIR*	18	28	0.344444	3036.71	9.73602	1.99935
BIOML-A6	1456672	1456902	231	GTAGTGACATAAATGTCACTATTTTTTTG	ATGACAACACAAATCATTAACAATTTTAATTCACTTAATTCCGAAGATCTTTCTACTGTTAAGGGGGGAGCATGTAGTTTTTGGGGAGCTACAGCTGCCGTAGGTGTCGGGGCTGTTGGAGGAGCCGTTAAAGGTGGTATTCAAACAGGTACTTGGCAAGGTGCAGCCTTAAAGGGTATTGGTTATGGTATTAAAGGTGGGATTACTTATGGCCTTACTTGTCGTTATTAG	MTTQIINNFNSLNSEDLSTVKGGACSFWGATAAVGVGAVGGAVKGGIQTGTWQGAALKGIGYGIKGGITYGLTCRY*	MTTQIINNFNSLNSEDLSTVKGG	ACSFWGATAAVGVGAVGGAVKGGIQTGTWQGAALKGIGYGIKGGITYGLTCRY*	23	54	0.479245	5119.62	9.74961	3.93583
BIOML-A6	1465284	1465463	180	GTGGTGACATACATGTCACTACTTTTTTG	ATGACAACACAAACAATGAACAATTTTGAAACACTCGATCTCGAGGCACTTGCAAACGTTGAAGGTGGTGGATGGGTTAAGTGTTATGCCGGCACAATCGGATCTGCTCTAGTAGGATCAGCAGGAGGCCCAGTAGGTTACTGGGGAGGAGCTTTAGTTGGTTATGCCACATTCTGCTAA	MTTQTMNNFETLDLEALANVEGGGWVKCYAGTIGSALVGSAGGPVGYWGGALVGYATFC*	MTTQTMNNFETLDLEALANVEGG	GWVKCYAGTIGSALVGSAGGPVGYWGGALVGYATFC*	23	37	0.763889	3494.68	8.2049	0.936154
BIOML-A6	1465299	1465463	165	GTGGTGACATACATGTCACTACTTTTTTG	ATGAACAATTTTGAAACACTCGATCTCGAGGCACTTGCAAACGTTGAAGGTGGTGGATGGGTTAAGTGTTATGCCGGCACAATCGGATCTGCTCTAGTAGGATCAGCAGGAGGCCCAGTAGGTTACTGGGGAGGAGCTTTAGTTGGTTATGCCACATTCTGCTAA	MNNFETLDLEALANVEGGGWVKCYAGTIGSALVGSAGGPVGYWGGALVGYATFC*	MNNFETLDLEALANVEGG	GWVKCYAGTIGSALVGSAGGPVGYWGGALVGYATFC*	18	37	0.763889	3494.68	8.2049	0.936154
BIOML-A7	1648921	1649088	168	ATGGTGACATTTATGTCACTACTTTTTTA	ATGACTAAGACCATTAACAATCGTAAAAACATGACTACTCAAGAACTTGAAGCTGTATCAGGTGGAGTGGTTCCTTGGGCCGCTATTTCTGTTGGCATTGCTGCTGCAAAACTGACTTATGACCTTAGCTATGCTGCAGGTAAGTCTTTCTATAACCTCATCCACTAA	MTKTINNRKNMTTQELEAVSGGVVPWAAISVGIAAAKLTYDLSYAAGKSFYNLIH*	MTKTINNRKNMTTQELEAVSGG	VVPWAAISVGIAAAKLTYDLSYAAGKSFYNLIH*	22	34	0.745455	3508.88	9.03496	1.23835
BIOML-A7	1648736	1648900	165	ATGGTGACATTTATGTCACTACTTTTTTA	ATGACAATGATTAACAAAGAAATAAAGGTAGCTGACCTAGCCTCAGTAACAGGAGGCGGATGGAAGACCAACCTTGCCATTGGAGGGCTCTGCCTAGCTTCAGGACCTATTGGAACTATGGTATGCCTTGGAGCCTACAATGGCTACATGGACTCTGCACGATGA	MTMINKEIKVADLASVTGGGWKTNLAIGGLCLASGPIGTMVCLGAYNGYMDSAR*	MTMINKEIKVADLASVTGG	GWKTNLAIGGLCLASGPIGTMVCLGAYNGYMDSAR*	19	36	0.417143	3559.71	8.21289	0.937738
BIOML-A7	1648742	1648900	159	ATGGTGACATTTATGTCACTACTTTTTTA	ATGATTAACAAAGAAATAAAGGTAGCTGACCTAGCCTCAGTAACAGGAGGCGGATGGAAGACCAACCTTGCCATTGGAGGGCTCTGCCTAGCTTCAGGACCTATTGGAACTATGGTATGCCTTGGAGCCTACAATGGCTACATGGACTCTGCACGATGA	MINKEIKVADLASVTGGGWKTNLAIGGLCLASGPIGTMVCLGAYNGYMDSAR*	MINKEIKVADLASVTGG	GWKTNLAIGGLCLASGPIGTMVCLGAYNGYMDSAR*	17	36	0.417143	3559.71	8.21289	0.937738
BIOML-A7	1543320	1543469	150	ATAGTGACATCTATGTCACTATTTTTTTG	ATGCGTACTAAAGCATATGGCGAAGAGCTAACTGCTGAAACCTTAGAAAATGTCACAGGAGGTAATTTTGTATATAGGCCCAAGACTTTTCCTGAACGATTAGGTTGGGACAGATGGTGGTTAAAAAGAAAATACCCTTATGGCGATTAG	MRTKAYGEELTAETLENVTGGNFVYRPKTFPERLGWDRWWLKRKYPYGD*	MRTKAYGEELTAETLENVTGG	NFVYRPKTFPERLGWDRWWLKRKYPYGD*	21	29	-1.4	3672.89	10.443	3.99998
BIOML-A7	1606813	1607043	231	GTAGTGACATTTATGTCACTACTTTTTTG	ATGACAACACAAATCATTAACAATTTTAACTCACTTAATTCCGAAGATCTTTCTACTGTTAAGGGTGGAGCATGTAGTTTTTGGGGAGCTACAGCTGCCGTAGGCGTCGGGGCTGTTGGAGGAGCCATTAAAGGTGGTATTCAAACAGGTACTTGGCAAGGTGCAGCCTTAAAGGGTATTGGTTATGGTATTAAAGATGGGATTACTTATGGCCTTATTTGTCGTTATTAG	MTTQIINNFNSLNSEDLSTVKGGACSFWGATAAVGVGAVGGAIKGGIQTGTWQGAALKGIGYGIKDGITYGLICRY*	MTTQIINNFNSLNSEDLSTVKGG	ACSFWGATAAVGVGAVGGAIKGGIQTGTWQGAALKGIGYGIKDGITYGLICRY*	23	54	0.524528	5203.67	9.26645	2.93663
BIOML-A7	1615420	1615650	231	GTGGTGACATTTATGTCACTACTTTTTTG	ATGACAACACAAACAATGAACAATTTTGAAACACTCGATCTCGAGACACTTGCAAACGTTGAAGGTGGCGGATGTAGCTGGGGAGGTTTTGCTAAACAAGGAGTAGCTACAGGAGTTGGTAATGGTTTACGATTAGGTATCAAAACACGTACTTGGCAAGGTGCTGTCGCAGGAGCAGCTGGAGGTGCTATCGTAGGGGGTGTTGGTTATGGAGCAACATGCTGGTGGTGA	MTTQTMNNFETLDLETLANVEGGGCSWGGFAKQGVATGVGNGLRLGIKTRTWQGAVAGAAGGAIVGGVGYGATCWW*	MTTQTMNNFETLDLETLANVEGG	GCSWGGFAKQGVATGVGNGLRLGIKTRTWQGAVAGAAGGAIVGGVGYGATCWW*	23	54	0.332075	5136.57	10.2636	3.93758
BIOML-A7	1615435	1615650	216	GTGGTGACATTTATGTCACTACTTTTTTG	ATGAACAATTTTGAAACACTCGATCTCGAGACACTTGCAAACGTTGAAGGTGGCGGATGTAGCTGGGGAGGTTTTGCTAAACAAGGAGTAGCTACAGGAGTTGGTAATGGTTTACGATTAGGTATCAAAACACGTACTTGGCAAGGTGCTGTCGCAGGAGCAGCTGGAGGTGCTATCGTAGGGGGTGTTGGTTATGGAGCAACATGCTGGTGGTGA	MNNFETLDLETLANVEGGGCSWGGFAKQGVATGVGNGLRLGIKTRTWQGAVAGAAGGAIVGGVGYGATCWW*	MNNFETLDLETLANVEGG	GCSWGGFAKQGVATGVGNGLRLGIKTRTWQGAVAGAAGGAIVGGVGYGATCWW*	18	54	0.332075	5136.57	10.2636	3.93758
BIOML-A7	1619438	1619596	159	GTAGTGACATTTATGTCACTACTTTTTTG	ATGGGAACTCAAACAATTGAAAACTTTAACACCCTCGACCTTGAAACACTTGCTAGTGTTGAAGGAGGACGAGTCAATTGGGAACGATGGGGAATGTGTGGGGCCTCTGTCGCCGTAGGTGCAACTATTGGAGGTGGAGTAGCCTTACTTGGCTGTTAA	MGTQTIENFNTLDLETLASVEGGRVNWERWGMCGASVAVGATIGGGVALLGC*	MGTQTIENFNTLDLETLASVEGG	RVNWERWGMCGASVAVGATIGGGVALLGC*	23	30	0.72069	2889.42	8.23143	0.939944
BIOML-A8	501153	501320	168	ATGGTGACATTTATGTCACTACTTTTTTA	ATGACTAAGACCATTAACAATCGTAAAAACATGACTACTCAAGAACTTGAAGCTGTATCAGGTGGAGTGGTTCCTTGGGCCGCTATTTCTGTTGGCATTGCTGCTGCAAAACTGACTTATGACCTTAGCTATGCTGCAGGTAAGTCTTTCTATAACCTCACCCACTAA	MTKTINNRKNMTTQELEAVSGGVVPWAAISVGIAAAKLTYDLSYAAGKSFYNLTH*	MTKTINNRKNMTTQELEAVSGG	VVPWAAISVGIAAAKLTYDLSYAAGKSFYNLTH*	22	34	0.587879	3496.84	9.03496	1.23835
BIOML-A8	500969	501133	165	ATGGTGACATTTATGTCACTACTTTTTTA	ATGACAATGATTAATAAAGAAATGAAGGCAGCTGACCTAGCCTCAGTAACAGGAGGCGGATGGAAGACTAACCTTGCCATTGGAGGGCTCTGCCTAGCTTCAGGACCTATTGGAACTATGATGTGCCTTGGAGCCTACAATGGCTACATGGACTCTGCGCGATAA	MTMINKEMKAADLASVTGGGWKTNLAIGGLCLASGPIGTMMCLGAYNGYMDSAR*	MTMINKEMKAADLASVTGG	GWKTNLAIGGLCLASGPIGTMMCLGAYNGYMDSAR*	19	36	0.351429	3591.68	8.21289	0.937738
BIOML-A8	500975	501133	159	ATGGTGACATTTATGTCACTACTTTTTTA	ATGATTAATAAAGAAATGAAGGCAGCTGACCTAGCCTCAGTAACAGGAGGCGGATGGAAGACTAACCTTGCCATTGGAGGGCTCTGCCTAGCTTCAGGACCTATTGGAACTATGATGTGCCTTGGAGCCTACAATGGCTACATGGACTCTGCGCGATAA	MINKEMKAADLASVTGGGWKTNLAIGGLCLASGPIGTMMCLGAYNGYMDSAR*	MINKEMKAADLASVTGG	GWKTNLAIGGLCLASGPIGTMMCLGAYNGYMDSAR*	17	36	0.351429	3591.68	8.21289	0.937738
BIOML-A8	107084	107233	150	ATAGTGACATCTATGTCACTATTTTTTTG	ATGCGAACTAAGGCATATGGCGAAGAGCTCACTGCTGAAACCTTAGAAAATGTCACAGGGGGTGATTTTGTATCTAGACCTCAAACCTTACCTGAACGATTGGGTTGGGACAGATGGTGGTTAAAAAGAAAATATCCTTATGGCGATTAG	MRTKAYGEELTAETLENVTGGDFVSRPQTLPERLGWDRWWLKRKYPYGD*	MRTKAYGEELTAETLENVTGG	DFVSRPQTLPERLGWDRWWLKRKYPYGD*	21	29	-1.33214	3563.82	9.92385	2.00172
BIOML-A8	1347321	1347515	195	ATGGTGACATTTATGTCACTATTTTTTGT	ATGGTATTGAATTTAGAAAATGTAAACTGTGTTACTCTTCAAGATGAAGAATTGATGATGGTTAACGGAGGTCTTGCACCGATTGTAATTGGTGGAGTTGTCGTAGGTTGGAAGGTCATTGGTGGCGTTGCAGGTGTTATAGCAGCAAGTGGTGCTGCAGGGATTGCAGCAGGTTATTATGCTAATCGTCCTTAA	MVLNLENVNCVTLQDEELMMVNGGLAPIVIGGVVVGWKVIGGVAGVIAASGAAGIAAGYYANRP*	MVLNLENVNCVTLQDEELMMVNGG	LAPIVIGGVVVGWKVIGGVAGVIAASGAAGIAAGYYANRP*	24	41	1.2225	3734.1	10.0086	1.99825
BIOML-A8	1347327	1347515	189	ATGGTGACATTTATGTCACTATTTTTTGT	TTGAATTTAGAAAATGTAAACTGTGTTACTCTTCAAGATGAAGAATTGATGATGGTTAACGGAGGTCTTGCACCGATTGTAATTGGTGGAGTTGTCGTAGGTTGGAAGGTCATTGGTGGCGTTGCAGGTGTTATAGCAGCAAGTGGTGCTGCAGGGATTGCAGCAGGTTATTATGCTAATCGTCCTTAA	LNLENVNCVTLQDEELMMVNGGLAPIVIGGVVVGWKVIGGVAGVIAASGAAGIAAGYYANRP*	LNLENVNCVTLQDEELMMVNGG	LAPIVIGGVVVGWKVIGGVAGVIAASGAAGIAAGYYANRP*	22	41	1.2225	3734.1	10.0086	1.99825
BIOML-A8	1347735	1347890	156	ATGGTGACATTTATGTCACTATTTTTTGT	ATGTCTAAAAAATATGAGTTGAGTAAAAAAGAATTACAGGAAATTCAAGGAGGTGTTGCACCAATTATGGTTGCTATTGGTTTAGGAAGTCTAGCAGTAGCATCATTTAGTTCAGGATATAAATTTGGAACAGATTTAGCTAGACGTGGACGATAG	MSKKYELSKKELQEIQGGVAPIMVAIGLGSLAVASFSSGYKFGTDLARRGR*	MSKKYELSKKELQEIQGG	VAPIMVAIGLGSLAVASFSSGYKFGTDLARRGR*	18	34	0.6	3366.82	11.4308	2.99983
BIOML-A8	1411543	1411773	231	GTGGTGACATAAATGTCACTACTGTTTTG	ATGACAACAAAAATCGTTAACAATTTTAACTCACTTAATTCCGAAGATCTTTCTACTGTTAAGGGGGGAGCATGTAGTTTTTGGGGAGCTACAGCTGCCGTAGGTGTCGGGGCTGTTGGAGGAGCCGTTAAAGGTGGTATTCAAACAGGTACTTGGCAAGGTGCAGCCTTAAAGGGTATTGGTTATGGTATTAAAGGTGGGATTACTTATGGCCTTACTTGTCGTTATTAG	MTTKIVNNFNSLNSEDLSTVKGGACSFWGATAAVGVGAVGGAVKGGIQTGTWQGAALKGIGYGIKGGITYGLTCRY*	MTTKIVNNFNSLNSEDLSTVKGG	ACSFWGATAAVGVGAVGGAVKGGIQTGTWQGAALKGIGYGIKGGITYGLTCRY*	23	54	0.479245	5119.62	9.74961	3.93583
BIOML-A8	1420138	1420317	180	GTGGTGACATCCATGTCACTACTTTTTTG	ATGACAACACAAACAATGAACAATTTTGAAACACTCGATCTTGAGGCACTTGCAAACGTTGAAGGTGGTGGATGGGTTAAGTGTTATGCCGGAACAATCGGATCTGCTCTAGTAGGATCAGCAGGAGGCCCAGTAGGTTACTGGGGAGGAGCTTTAGTTGGTTATGCCACATTCTGCTAA	MTTQTMNNFETLDLEALANVEGGGWVKCYAGTIGSALVGSAGGPVGYWGGALVGYATFC*	MTTQTMNNFETLDLEALANVEGG	GWVKCYAGTIGSALVGSAGGPVGYWGGALVGYATFC*	23	37	0.763889	3494.68	8.2049	0.936154
BIOML-A8	1420153	1420317	165	GTGGTGACATCCATGTCACTACTTTTTTG	ATGAACAATTTTGAAACACTCGATCTTGAGGCACTTGCAAACGTTGAAGGTGGTGGATGGGTTAAGTGTTATGCCGGAACAATCGGATCTGCTCTAGTAGGATCAGCAGGAGGCCCAGTAGGTTACTGGGGAGGAGCTTTAGTTGGTTATGCCACATTCTGCTAA	MNNFETLDLEALANVEGGGWVKCYAGTIGSALVGSAGGPVGYWGGALVGYATFC*	MNNFETLDLEALANVEGG	GWVKCYAGTIGSALVGSAGGPVGYWGGALVGYATFC*	18	37	0.763889	3494.68	8.2049	0.936154
BIOML-A8	1508949	1509119	171	TTAGTGACATTTATGTCACTATTTTTTTC	ATGTTAGAAATAAATATGATTTATTCTGACTTATCACTTACTGAACTTGCTCAAGTTAATGGGGGAGGGATTATGTCAAGTGTAGCTGGACTTGTTAAAGATACCTGGGGAACGTTATATTCTACAGGAAGAGACTTTGGACGTAGCGTTGTTAACGCTGCTATGCCTTAA	MLEINMIYSDLSLTELAQVNGGGIMSSVAGLVKDTWGTLYSTGRDFGRSVVNAAMP*	MLEINMIYSDLSLTELAQVNGG	GIMSSVAGLVKDTWGTLYSTGRDFGRSVVNAAMP*	22	35	0.188235	3542.76	9.2964	1.00063
BIOML-A8	1509131	1509301	171	TTAGTGACATTTATGTCACTATTTTTTTC	ATGTATAGAGAAAAGAGAAATAATGAAGAACTGAATATTAATGATCTTGCCATGATTAATGGTGGAGTAGCCCCTGTAGTTATTGCTGTAGGGGTAATTGCGACACCATTTGTATTGGGCGCGATTGCTGGAGGCGCAGATGAGTATGCAAGGAAGCGAGGGCATCACTGA	MYREKRNNEELNINDLAMINGGVAPVVIAVGVIATPFVLGAIAGGADEYARKRGHH*	MYREKRNNEELNINDLAMINGG	VAPVVIAVGVIATPFVLGAIAGGADEYARKRGHH*	22	35	0.717647	3410.89	9.30118	1.4816
BIOML-A9	224971	225138	168	ATGGTGACATTTATGTCACTACTTTTTTA	ATGACTAAGACCATTAACAATCGTAAAAACATGACTACTCAAGAACTTGAAGCTGTATCAGGTGGAGTGGTTCCTTGGGCCGCTATTTCTGTTGGCATTGCTGCTGCAAAACTGACTTATGACCTTAGCTATGCTGCAGGTAAGTCTTTCTATAACCTCACCCACTAA	MTKTINNRKNMTTQELEAVSGGVVPWAAISVGIAAAKLTYDLSYAAGKSFYNLTH*	MTKTINNRKNMTTQELEAVSGG	VVPWAAISVGIAAAKLTYDLSYAAGKSFYNLTH*	22	34	0.587879	3496.84	9.03496	1.23835
BIOML-A9	224787	224951	165	ATGGTGACATTTATGTCACTACTTTTTTA	ATGACAATGATTAATAAAGAAATGAAGGCAGCTGACCTAGCCTCAGTAACAGGAGGCGGATGGAAGACTAACCTTGCCATTGGAGGGCTCTGCCTAGCTTCAGGACCTATTGGAACTATGATGTGCCTTGGAGCCTACAATGGCTACATGGACTCTGCGCGATAA	MTMINKEMKAADLASVTGGGWKTNLAIGGLCLASGPIGTMMCLGAYNGYMDSAR*	MTMINKEMKAADLASVTGG	GWKTNLAIGGLCLASGPIGTMMCLGAYNGYMDSAR*	19	36	0.351429	3591.68	8.21289	0.937738
BIOML-A9	224793	224951	159	ATGGTGACATTTATGTCACTACTTTTTTA	ATGATTAATAAAGAAATGAAGGCAGCTGACCTAGCCTCAGTAACAGGAGGCGGATGGAAGACTAACCTTGCCATTGGAGGGCTCTGCCTAGCTTCAGGACCTATTGGAACTATGATGTGCCTTGGAGCCTACAATGGCTACATGGACTCTGCGCGATAA	MINKEMKAADLASVTGGGWKTNLAIGGLCLASGPIGTMMCLGAYNGYMDSAR*	MINKEMKAADLASVTGG	GWKTNLAIGGLCLASGPIGTMMCLGAYNGYMDSAR*	17	36	0.351429	3591.68	8.21289	0.937738
BIOML-A9	1602258	1602416	159	ATAGTGACATTTATGTCACTATTTTTTTG	ATGTATATGGATACAATGATGATGGATAAATTTGATTCTTTAACCTTTGATAAGCTTTCTGAAATTGTTGGGGGAAATGTAGCATATGACATTGGTTATGGAGTTGGACAAGTAAGTTATATTGCAGTTGAGATTTTAAAACTGAGAAAAATAAGATAG	MYMDTMMMDKFDSLTFDKLSEIVGGNVAYDIGYGVGQVSYIAVEILKLRKIR*	MYMDTMMMDKFDSLTFDKLSEIVGG	NVAYDIGYGVGQVSYIAVEILKLRKIR*	25	28	0.344444	3036.71	9.73602	1.99935
BIOML-A9	1602264	1602416	153	ATAGTGACATTTATGTCACTATTTTTTTG	ATGGATACAATGATGATGGATAAATTTGATTCTTTAACCTTTGATAAGCTTTCTGAAATTGTTGGGGGAAATGTAGCATATGACATTGGTTATGGAGTTGGACAAGTAAGTTATATTGCAGTTGAGATTTTAAAACTGAGAAAAATAAGATAG	MDTMMMDKFDSLTFDKLSEIVGGNVAYDIGYGVGQVSYIAVEILKLRKIR*	MDTMMMDKFDSLTFDKLSEIVGG	NVAYDIGYGVGQVSYIAVEILKLRKIR*	23	28	0.344444	3036.71	9.73602	1.99935
BIOML-A9	1601339	1601488	150	ATAGTGACATTTATGTCACTATTTTTTTG	ATGCGAACTAAGGCATATGGCGAAGAGCTCACTGCTGAAACCTTAGAAAATGTCACAGGGGGTGATTTTGTATCTAGACCTCAAACCTTACCTGAACGATTGGGTTGGAATAGATGGTGGTTGAAAAGAAAATACCCTTATGGTGATTAG	MRTKAYGEELTAETLENVTGGDFVSRPQTLPERLGWNRWWLKRKYPYGD*	MRTKAYGEELTAETLENVTGG	DFVSRPQTLPERLGWNRWWLKRKYPYGD*	21	29	-1.33214	3562.84	10.4397	3.00093
BIOML-A9	1602102	1602251	150	ATAGTGACATTTATGTCACTATTTTTTTG	ATGAAAAATACATTTCAAAAAATTGATATTAAAGATTTAGCAATTGTAGTTGGTGGAAGTATTTACTCATCTGTAGGATATGGAGTCGGAGTAGTTACTCACACGGTTTATGATTTTGGTCGTGGATTTGTAGATGGATTTAGAGGTTAA	MKNTFQKIDIKDLAIVVGGSIYSSVGYGVGVVTHTVYDFGRGFVDGFRG*	MKNTFQKIDIKDLAIVVGG	SIYSSVGYGVGVVTHTVYDFGRGFVDGFRG*	19	31	0.28	3197.56	7.52846	0.239453
BIOML-A9	1602273	1602416	144	ATAGTGACATTTATGTCACTATTTTTTTG	ATGATGATGGATAAATTTGATTCTTTAACCTTTGATAAGCTTTCTGAAATTGTTGGGGGAAATGTAGCATATGACATTGGTTATGGAGTTGGACAAGTAAGTTATATTGCAGTTGAGATTTTAAAACTGAGAAAAATAAGATAG	MMMDKFDSLTFDKLSEIVGGNVAYDIGYGVGQVSYIAVEILKLRKIR*	MMMDKFDSLTFDKLSEIVGG	NVAYDIGYGVGQVSYIAVEILKLRKIR*	20	28	0.344444	3036.71	9.73602	1.99935
BIOML-A9	1602276	1602416	141	ATAGTGACATTTATGTCACTATTTTTTTG	ATGATGGATAAATTTGATTCTTTAACCTTTGATAAGCTTTCTGAAATTGTTGGGGGAAATGTAGCATATGACATTGGTTATGGAGTTGGACAAGTAAGTTATATTGCAGTTGAGATTTTAAAACTGAGAAAAATAAGATAG	MMDKFDSLTFDKLSEIVGGNVAYDIGYGVGQVSYIAVEILKLRKIR*	MMDKFDSLTFDKLSEIVGG	NVAYDIGYGVGQVSYIAVEILKLRKIR*	19	28	0.344444	3036.71	9.73602	1.99935
BIOML-A9	1602279	1602416	138	ATAGTGACATTTATGTCACTATTTTTTTG	ATGGATAAATTTGATTCTTTAACCTTTGATAAGCTTTCTGAAATTGTTGGGGGAAATGTAGCATATGACATTGGTTATGGAGTTGGACAAGTAAGTTATATTGCAGTTGAGATTTTAAAACTGAGAAAAATAAGATAG	MDKFDSLTFDKLSEIVGGNVAYDIGYGVGQVSYIAVEILKLRKIR*	MDKFDSLTFDKLSEIVGG	NVAYDIGYGVGQVSYIAVEILKLRKIR*	18	28	0.344444	3036.71	9.73602	1.99935
BIOML-A9	1602258	1602416	159	ATGGTGACATCTATGTCACTATTTTTTAT	ATGTATATGGATACAATGATGATGGATAAATTTGATTCTTTAACCTTTGATAAGCTTTCTGAAATTGTTGGGGGAAATGTAGCATATGACATTGGTTATGGAGTTGGACAAGTAAGTTATATTGCAGTTGAGATTTTAAAACTGAGAAAAATAAGATAG	MYMDTMMMDKFDSLTFDKLSEIVGGNVAYDIGYGVGQVSYIAVEILKLRKIR*	MYMDTMMMDKFDSLTFDKLSEIVGG	NVAYDIGYGVGQVSYIAVEILKLRKIR*	25	28	0.344444	3036.71	9.73602	1.99935
BIOML-A9	1602264	1602416	153	ATGGTGACATCTATGTCACTATTTTTTAT	ATGGATACAATGATGATGGATAAATTTGATTCTTTAACCTTTGATAAGCTTTCTGAAATTGTTGGGGGAAATGTAGCATATGACATTGGTTATGGAGTTGGACAAGTAAGTTATATTGCAGTTGAGATTTTAAAACTGAGAAAAATAAGATAG	MDTMMMDKFDSLTFDKLSEIVGGNVAYDIGYGVGQVSYIAVEILKLRKIR*	MDTMMMDKFDSLTFDKLSEIVGG	NVAYDIGYGVGQVSYIAVEILKLRKIR*	23	28	0.344444	3036.71	9.73602	1.99935
BIOML-A9	1602102	1602251	150	ATGGTGACATCTATGTCACTATTTTTTAT	ATGAAAAATACATTTCAAAAAATTGATATTAAAGATTTAGCAATTGTAGTTGGTGGAAGTATTTACTCATCTGTAGGATATGGAGTCGGAGTAGTTACTCACACGGTTTATGATTTTGGTCGTGGATTTGTAGATGGATTTAGAGGTTAA	MKNTFQKIDIKDLAIVVGGSIYSSVGYGVGVVTHTVYDFGRGFVDGFRG*	MKNTFQKIDIKDLAIVVGG	SIYSSVGYGVGVVTHTVYDFGRGFVDGFRG*	19	31	0.28	3197.56	7.52846	0.239453
BIOML-A9	1602273	1602416	144	ATGGTGACATCTATGTCACTATTTTTTAT	ATGATGATGGATAAATTTGATTCTTTAACCTTTGATAAGCTTTCTGAAATTGTTGGGGGAAATGTAGCATATGACATTGGTTATGGAGTTGGACAAGTAAGTTATATTGCAGTTGAGATTTTAAAACTGAGAAAAATAAGATAG	MMMDKFDSLTFDKLSEIVGGNVAYDIGYGVGQVSYIAVEILKLRKIR*	MMMDKFDSLTFDKLSEIVGG	NVAYDIGYGVGQVSYIAVEILKLRKIR*	20	28	0.344444	3036.71	9.73602	1.99935
BIOML-A9	1602276	1602416	141	ATGGTGACATCTATGTCACTATTTTTTAT	ATGATGGATAAATTTGATTCTTTAACCTTTGATAAGCTTTCTGAAATTGTTGGGGGAAATGTAGCATATGACATTGGTTATGGAGTTGGACAAGTAAGTTATATTGCAGTTGAGATTTTAAAACTGAGAAAAATAAGATAG	MMDKFDSLTFDKLSEIVGGNVAYDIGYGVGQVSYIAVEILKLRKIR*	MMDKFDSLTFDKLSEIVGG	NVAYDIGYGVGQVSYIAVEILKLRKIR*	19	28	0.344444	3036.71	9.73602	1.99935
BIOML-A9	1602279	1602416	138	ATGGTGACATCTATGTCACTATTTTTTAT	ATGGATAAATTTGATTCTTTAACCTTTGATAAGCTTTCTGAAATTGTTGGGGGAAATGTAGCATATGACATTGGTTATGGAGTTGGACAAGTAAGTTATATTGCAGTTGAGATTTTAAAACTGAGAAAAATAAGATAG	MDKFDSLTFDKLSEIVGGNVAYDIGYGVGQVSYIAVEILKLRKIR*	MDKFDSLTFDKLSEIVGG	NVAYDIGYGVGQVSYIAVEILKLRKIR*	18	28	0.344444	3036.71	9.73602	1.99935
BIOML-A9	1668270	1668500	231	GTAGTGACATAAATGTCACTATTTTTTTG	ATGACAACACAAATCATTAACAATTTTAATTCACTTAATTCCGAAGATCTTTCTACTGTTAAGGGGGGAGCATGTAGTTTTTGGGGAGCTACAGCTGCCGTAGGTGTCGGGGCTGTTGGAGGAGCCGTTAAAGGTGGTATTCAAACAGGTACTTGGCAAGGTGCAGCCTTAAAGGGTATTGGTTATGGTATTAAAGGTGGGATTACTTATGGCCTTACTTGTCGTTATTAG	MTTQIINNFNSLNSEDLSTVKGGACSFWGATAAVGVGAVGGAVKGGIQTGTWQGAALKGIGYGIKGGITYGLTCRY*	MTTQIINNFNSLNSEDLSTVKGG	ACSFWGATAAVGVGAVGGAVKGGIQTGTWQGAALKGIGYGIKGGITYGLTCRY*	23	54	0.479245	5119.62	9.74961	3.93583
BIOML-A9	1676882	1677061	180	GTGGTGACATACATGTCACTACTTTTTTG	ATGACAACACAAACAATGAACAATTTTGAAACACTCGATCTCGAGGCACTTGCAAACGTTGAAGGTGGTGGATGGGTTAAGTGTTATGCCGGCACAATCGGATCTGCTCTAGTAGGATCAGCAGGAGGCCCAGTAGGTTACTGGGGAGGAGCTTTAGTTGGTTATGCCACATTCTGCTAA	MTTQTMNNFETLDLEALANVEGGGWVKCYAGTIGSALVGSAGGPVGYWGGALVGYATFC*	MTTQTMNNFETLDLEALANVEGG	GWVKCYAGTIGSALVGSAGGPVGYWGGALVGYATFC*	23	37	0.763889	3494.68	8.2049	0.936154
BIOML-A9	1676897	1677061	165	GTGGTGACATACATGTCACTACTTTTTTG	ATGAACAATTTTGAAACACTCGATCTCGAGGCACTTGCAAACGTTGAAGGTGGTGGATGGGTTAAGTGTTATGCCGGCACAATCGGATCTGCTCTAGTAGGATCAGCAGGAGGCCCAGTAGGTTACTGGGGAGGAGCTTTAGTTGGTTATGCCACATTCTGCTAA	MNNFETLDLEALANVEGGGWVKCYAGTIGSALVGSAGGPVGYWGGALVGYATFC*	MNNFETLDLEALANVEGG	GWVKCYAGTIGSALVGSAGGPVGYWGGALVGYATFC*	18	37	0.763889	3494.68	8.2049	0.936154
BIOML-A9	1539684	1539878	195	ATGGTGACATTTATGTCACTATTTTTTGT	ATGGTATTGAATTTAGAAAATGTAAACTGTGTTACTCTTCAAGATGAAGAATTGATGATGGTTAACGGAGGTCTTGCACCGATTGTAATTGGTGGAGTTGTCGTAGGTTGGAAGGTCATTGGTGGCGTTGCAGGTGTTATAGCAGCAAGTGGTGCTGCAGGGATTGCAGCAGGTTATTATGCTAATCGTCCTTAA	MVLNLENVNCVTLQDEELMMVNGGLAPIVIGGVVVGWKVIGGVAGVIAASGAAGIAAGYYANRP*	MVLNLENVNCVTLQDEELMMVNGG	LAPIVIGGVVVGWKVIGGVAGVIAASGAAGIAAGYYANRP*	24	41	1.2225	3734.1	10.0086	1.99825
BIOML-A9	1539690	1539878	189	ATGGTGACATTTATGTCACTATTTTTTGT	TTGAATTTAGAAAATGTAAACTGTGTTACTCTTCAAGATGAAGAATTGATGATGGTTAACGGAGGTCTTGCACCGATTGTAATTGGTGGAGTTGTCGTAGGTTGGAAGGTCATTGGTGGCGTTGCAGGTGTTATAGCAGCAAGTGGTGCTGCAGGGATTGCAGCAGGTTATTATGCTAATCGTCCTTAA	LNLENVNCVTLQDEELMMVNGGLAPIVIGGVVVGWKVIGGVAGVIAASGAAGIAAGYYANRP*	LNLENVNCVTLQDEELMMVNGG	LAPIVIGGVVVGWKVIGGVAGVIAASGAAGIAAGYYANRP*	22	41	1.2225	3734.1	10.0086	1.99825
BIOML-A9	1540098	1540253	156	ATGGTGACATTTATGTCACTATTTTTTGT	ATGTCTAAAAAATATGAGTTGAGTAAAAAAGAATTACAGGAAATTCAAGGAGGTGTTGCACCAATTATGGTTGCTATTGGTTTAGGAAGTCTAGCAGTAGCATCATTTAGTTCAGGATATAAATTTGGAACAGATTTAGCTAGACGTGGACGATAG	MSKKYELSKKELQEIQGGVAPIMVAIGLGSLAVASFSSGYKFGTDLARRGR*	MSKKYELSKKELQEIQGG	VAPIMVAIGLGSLAVASFSSGYKFGTDLARRGR*	18	34	0.6	3366.82	11.4308	2.99983
DE0578	841387	841539	153	GTAGTGACATTTATGTCACTATTTTTTTG	ATGGATACAATGGCGATGAATAGATTTGATTCTTTAACCTTTGATAAGCTTTCTGAAATTGTCGGGGGAAATGTAGCATATGACATTGGTTATGGAGTTGGACAAGTAAGTTATATTGCAGTTGAGATTTTAAAACTGAGAAAAATAAGATAG	MDTMAMNRFDSLTFDKLSEIVGGNVAYDIGYGVGQVSYIAVEILKLRKIR*	MDTMAMNRFDSLTFDKLSEIVGG	NVAYDIGYGVGQVSYIAVEILKLRKIR*	23	28	0.344444	3036.71	9.73602	1.99935
DE0578	841226	841375	150	GTAGTGACATTTATGTCACTATTTTTTTG	ATGAAAAATACATTTCAAAAAATTGATATTAAAGATTTAGCAATTGTAGTTGGTGGAAGTATTTACTCATCTGTAGGATATGGAGTCGGAGTAGTTACTCACACGGTTTATGATTTTGGTCGTGGATTTGTAGATGGATTTAGAGGTTAA	MKNTFQKIDIKDLAIVVGGSIYSSVGYGVGVVTHTVYDFGRGFVDGFRG*	MKNTFQKIDIKDLAIVVGG	SIYSSVGYGVGVVTHTVYDFGRGFVDGFRG*	19	31	0.28	3197.56	7.52846	0.239453
DE0578	840464	840613	150	GTAGTGACATTTATGTCACTATTTTTTTG	ATGCGAACTAAGGCATATGGTGAAGAGCTCAATGCTGAAACCTTAGAAAATGTTACAGGGGGTGGTTTTGTATCTAGACCTCAAACCTTACCTGAACGATTGGGTTGGAACAAATGGTGGTTGAAAAGAAGACCTCCTTATGGCGATTAG	MRTKAYGEELNAETLENVTGGGFVSRPQTLPERLGWNKWWLKRRPPYGD*	MRTKAYGEELNAETLENVTGG	GFVSRPQTLPERLGWNKWWLKRRPPYGD*	21	29	-1.23214	3438.82	11.5058	4.00093
DE0578	841396	841539	144	GTAGTGACATTTATGTCACTATTTTTTTG	ATGGCGATGAATAGATTTGATTCTTTAACCTTTGATAAGCTTTCTGAAATTGTCGGGGGAAATGTAGCATATGACATTGGTTATGGAGTTGGACAAGTAAGTTATATTGCAGTTGAGATTTTAAAACTGAGAAAAATAAGATAG	MAMNRFDSLTFDKLSEIVGGNVAYDIGYGVGQVSYIAVEILKLRKIR*	MAMNRFDSLTFDKLSEIVGG	NVAYDIGYGVGQVSYIAVEILKLRKIR*	20	28	0.344444	3036.71	9.73602	1.99935
DE0578	841402	841539	138	GTAGTGACATTTATGTCACTATTTTTTTG	ATGAATAGATTTGATTCTTTAACCTTTGATAAGCTTTCTGAAATTGTCGGGGGAAATGTAGCATATGACATTGGTTATGGAGTTGGACAAGTAAGTTATATTGCAGTTGAGATTTTAAAACTGAGAAAAATAAGATAG	MNRFDSLTFDKLSEIVGGNVAYDIGYGVGQVSYIAVEILKLRKIR*	MNRFDSLTFDKLSEIVGG	NVAYDIGYGVGQVSYIAVEILKLRKIR*	18	28	0.344444	3036.71	9.73602	1.99935
DE0578	841387	841539	153	ATAGTGACATCTATGTCACTATTTTTTAT	ATGGATACAATGGCGATGAATAGATTTGATTCTTTAACCTTTGATAAGCTTTCTGAAATTGTCGGGGGAAATGTAGCATATGACATTGGTTATGGAGTTGGACAAGTAAGTTATATTGCAGTTGAGATTTTAAAACTGAGAAAAATAAGATAG	MDTMAMNRFDSLTFDKLSEIVGGNVAYDIGYGVGQVSYIAVEILKLRKIR*	MDTMAMNRFDSLTFDKLSEIVGG	NVAYDIGYGVGQVSYIAVEILKLRKIR*	23	28	0.344444	3036.71	9.73602	1.99935
DE0578	841226	841375	150	ATAGTGACATCTATGTCACTATTTTTTAT	ATGAAAAATACATTTCAAAAAATTGATATTAAAGATTTAGCAATTGTAGTTGGTGGAAGTATTTACTCATCTGTAGGATATGGAGTCGGAGTAGTTACTCACACGGTTTATGATTTTGGTCGTGGATTTGTAGATGGATTTAGAGGTTAA	MKNTFQKIDIKDLAIVVGGSIYSSVGYGVGVVTHTVYDFGRGFVDGFRG*	MKNTFQKIDIKDLAIVVGG	SIYSSVGYGVGVVTHTVYDFGRGFVDGFRG*	19	31	0.28	3197.56	7.52846	0.239453
DE0578	841396	841539	144	ATAGTGACATCTATGTCACTATTTTTTAT	ATGGCGATGAATAGATTTGATTCTTTAACCTTTGATAAGCTTTCTGAAATTGTCGGGGGAAATGTAGCATATGACATTGGTTATGGAGTTGGACAAGTAAGTTATATTGCAGTTGAGATTTTAAAACTGAGAAAAATAAGATAG	MAMNRFDSLTFDKLSEIVGGNVAYDIGYGVGQVSYIAVEILKLRKIR*	MAMNRFDSLTFDKLSEIVGG	NVAYDIGYGVGQVSYIAVEILKLRKIR*	20	28	0.344444	3036.71	9.73602	1.99935
DE0578	841402	841539	138	ATAGTGACATCTATGTCACTATTTTTTAT	ATGAATAGATTTGATTCTTTAACCTTTGATAAGCTTTCTGAAATTGTCGGGGGAAATGTAGCATATGACATTGGTTATGGAGTTGGACAAGTAAGTTATATTGCAGTTGAGATTTTAAAACTGAGAAAAATAAGATAG	MNRFDSLTFDKLSEIVGGNVAYDIGYGVGQVSYIAVEILKLRKIR*	MNRFDSLTFDKLSEIVGG	NVAYDIGYGVGQVSYIAVEILKLRKIR*	18	28	0.344444	3036.71	9.73602	1.99935
DE0578	904762	904992	231	GTAGTGACATTTATGTCACTACTTTTTTG	ATGACGACACAAATCATTAACAATTTTAACTCACTTAATTCCGAAGATCTTTCTACTGTTAAGGGTGGAGCATGTAGTTTTTGGGGAGCTACAGCTGCCGTAGGCGTCGGGGCTGTTGGAGGAGCCATTAAAGGTGGTATTCAAACAGGTACTTGGCAAGGTGCAGCCTTAAAGGGTATTGGTTATGGTATTAAAGATGGGATTACTTATGGACTTATTTGTCGTTATTAG	MTTQIINNFNSLNSEDLSTVKGGACSFWGATAAVGVGAVGGAIKGGIQTGTWQGAALKGIGYGIKDGITYGLICRY*	MTTQIINNFNSLNSEDLSTVKGG	ACSFWGATAAVGVGAVGGAIKGGIQTGTWQGAALKGIGYGIKDGITYGLICRY*	23	54	0.524528	5203.67	9.26645	2.93663
DE0578	913355	913585	231	GTGGTGACATTTATGTCACTACTTTTTTG	ATGACAACACAAACAATGAACACTTTTGAAACACTCGATCTCGAGACACTTGCAAACGTTGAAGGTGGCGGATGTAGCTGGGGAGGTTTTGCTAAACAAGGAGTAGCTACAGGAGTTGGTAATGGTTTACGATTAGGTATCAAAACACGTACTTGGCAAGGTGCTGTCGCAGGAGCAGCTGGAGGTGCTATCGTAGGTGGTGTTGGTTATGGAGCAACATGCTGGTGGTGA	MTTQTMNTFETLDLETLANVEGGGCSWGGFAKQGVATGVGNGLRLGIKTRTWQGAVAGAAGGAIVGGVGYGATCWW*	MTTQTMNTFETLDLETLANVEGG	GCSWGGFAKQGVATGVGNGLRLGIKTRTWQGAVAGAAGGAIVGGVGYGATCWW*	23	54	0.332075	5136.57	10.2636	3.93758
DE0578	913370	913585	216	GTGGTGACATTTATGTCACTACTTTTTTG	ATGAACACTTTTGAAACACTCGATCTCGAGACACTTGCAAACGTTGAAGGTGGCGGATGTAGCTGGGGAGGTTTTGCTAAACAAGGAGTAGCTACAGGAGTTGGTAATGGTTTACGATTAGGTATCAAAACACGTACTTGGCAAGGTGCTGTCGCAGGAGCAGCTGGAGGTGCTATCGTAGGTGGTGTTGGTTATGGAGCAACATGCTGGTGGTGA	MNTFETLDLETLANVEGGGCSWGGFAKQGVATGVGNGLRLGIKTRTWQGAVAGAAGGAIVGGVGYGATCWW*	MNTFETLDLETLANVEGG	GCSWGGFAKQGVATGVGNGLRLGIKTRTWQGAVAGAAGGAIVGGVGYGATCWW*	18	54	0.332075	5136.57	10.2636	3.93758
DE0578	512738	512905	168	ATAGTGACATTTATGTCACTACTTTTTTA	ATGACTAAGACAATTAACAATCGTAAACACATGACTATTCGAGAACTTGAAGCTGTATCAGGTGGAGTGGTTCCTTGGGTGGCTATTTCTGTTGGCATGGCTGCTGCAAAACTGACTTATGACCTTAGCTATGCTGCGGGTAAATCTTTCTATAACCTCACTCACTAA	MTKTINNRKHMTIRELEAVSGGVVPWVAISVGMAAAKLTYDLSYAAGKSFYNLTH*	MTKTINNRKHMTIRELEAVSGG	VVPWVAISVGMAAAKLTYDLSYAAGKSFYNLTH*	22	34	0.581818	3542.83	9.03496	1.23835
DE0578	512553	512717	165	ATAGTGACATTTATGTCACTACTTTTTTA	ATGACAATGATTAACAAAGAATTGAACACCGCTGATCTAGCTACAGTAACAGGAGGCGGATGGAAGACCAACCTTGCCATTGGAGGGCTCTGCCTAGCTTCAGGACCTATTGGAACTATGATTTGCCTTGGTGCCTACAACGGCTACATGGACTCTGCACGATAA	MTMINKELNTADLATVTGGGWKTNLAIGGLCLASGPIGTMICLGAYNGYMDSAR*	MTMINKELNTADLATVTGG	GWKTNLAIGGLCLASGPIGTMICLGAYNGYMDSAR*	19	36	0.425714	3573.72	8.21289	0.937738
DE0578	512559	512717	159	ATAGTGACATTTATGTCACTACTTTTTTA	ATGATTAACAAAGAATTGAACACCGCTGATCTAGCTACAGTAACAGGAGGCGGATGGAAGACCAACCTTGCCATTGGAGGGCTCTGCCTAGCTTCAGGACCTATTGGAACTATGATTTGCCTTGGTGCCTACAACGGCTACATGGACTCTGCACGATAA	MINKELNTADLATVTGGGWKTNLAIGGLCLASGPIGTMICLGAYNGYMDSAR*	MINKELNTADLATVTGG	GWKTNLAIGGLCLASGPIGTMICLGAYNGYMDSAR*	17	36	0.425714	3573.72	8.21289	0.937738
F6-1	47694	47888	195	ATGGTGACATTTATGTCACTATTTTTTGT	ATGGTATTGAATTTAGAAAATGTAAACTGTGTTACTCTTCAAGATGAAGAATTAATGATGGTTAACGGAGGTCTCGCACCGATTGTTATTGGTGGAGTTGTCGTAGGTTGGAAGGTCATTGGTGGAGTGGCAGGTGTTATAGCAGCAAGTGGTGCTGCAGGGATTGCTGCAGGATATTATGCTAATCGTCCGTAA	MVLNLENVNCVTLQDEELMMVNGGLAPIVIGGVVVGWKVIGGVAGVIAASGAAGIAAGYYANRP*	MVLNLENVNCVTLQDEELMMVNGG	LAPIVIGGVVVGWKVIGGVAGVIAASGAAGIAAGYYANRP*	24	41	1.2225	3734.1	10.0086	1.99825
F6-1	47700	47888	189	ATGGTGACATTTATGTCACTATTTTTTGT	TTGAATTTAGAAAATGTAAACTGTGTTACTCTTCAAGATGAAGAATTAATGATGGTTAACGGAGGTCTCGCACCGATTGTTATTGGTGGAGTTGTCGTAGGTTGGAAGGTCATTGGTGGAGTGGCAGGTGTTATAGCAGCAAGTGGTGCTGCAGGGATTGCTGCAGGATATTATGCTAATCGTCCGTAA	LNLENVNCVTLQDEELMMVNGGLAPIVIGGVVVGWKVIGGVAGVIAASGAAGIAAGYYANRP*	LNLENVNCVTLQDEELMMVNGG	LAPIVIGGVVVGWKVIGGVAGVIAASGAAGIAAGYYANRP*	22	41	1.2225	3734.1	10.0086	1.99825
F6-1	48108	48263	156	ATGGTGACATTTATGTCACTATTTTTTGT	ATGTCTAAAAAATATGAGTTGACTAAAAAAGAATTGCAGGAAATTGAAGGTGGTGTTGCACCAATTATGGTTGCTATTGGTTTAGGAAGTCTAGCAGTAGCATCATTTAGTTCAGGATATAAATTTGGAACAGATTTAGCTAGACGTGGACGATAG	MSKKYELTKKELQEIEGGVAPIMVAIGLGSLAVASFSSGYKFGTDLARRGR*	MSKKYELTKKELQEIEGG	VAPIMVAIGLGSLAVASFSSGYKFGTDLARRGR*	18	34	0.6	3366.82	11.4308	2.99983
F6-1	689734	689901	168	ATGGTGACATTTATGTCACTACTTTTTTA	ATGACTAAGACCATTAACAATCGTAAAAACATGACTACTCAAGAACTTGAAGCTGTATCAGGTGGAGTGGTTCCTTGGGTCGCTATTTCTGTTGGCATGGCTGCTGCAAAACTAACTTATGATCTTAGCTATGCCGCAGGTAAATCTTTCTATAACCTCACTCACTAA	MTKTINNRKNMTTQELEAVSGGVVPWVAISVGMAAAKLTYDLSYAAGKSFYNLTH*	MTKTINNRKNMTTQELEAVSGG	VVPWVAISVGMAAAKLTYDLSYAAGKSFYNLTH*	22	34	0.581818	3542.83	9.03496	1.23835
F6-1	689549	689713	165	ATGGTGACATTTATGTCACTACTTTTTTA	ATGACAATGATTAACAAGGAAATGAAGGCAGCTGAGCTAGCCTCAGTAACAGGAGGCGGATGGAAGACCAACCTCGCCATTGGAGGACTCTGCCTAGCTTCAGGACCTATTGGAACTATGGTATGCCTTGGAGCCTACAATGGCTACATGGACTCTGCACGATGA	MTMINKEMKAAELASVTGGGWKTNLAIGGLCLASGPIGTMVCLGAYNGYMDSAR*	MTMINKEMKAAELASVTGG	GWKTNLAIGGLCLASGPIGTMVCLGAYNGYMDSAR*	19	36	0.417143	3559.71	8.21289	0.937738
F6-1	689555	689713	159	ATGGTGACATTTATGTCACTACTTTTTTA	ATGATTAACAAGGAAATGAAGGCAGCTGAGCTAGCCTCAGTAACAGGAGGCGGATGGAAGACCAACCTCGCCATTGGAGGACTCTGCCTAGCTTCAGGACCTATTGGAACTATGGTATGCCTTGGAGCCTACAATGGCTACATGGACTCTGCACGATGA	MINKEMKAAELASVTGGGWKTNLAIGGLCLASGPIGTMVCLGAYNGYMDSAR*	MINKEMKAAELASVTGG	GWKTNLAIGGLCLASGPIGTMVCLGAYNGYMDSAR*	17	36	0.417143	3559.71	8.21289	0.937738
F6-1	1667545	1667694	150	ATAGTGACATTTATGTCACTATTTTTTTG	ATGCGAACTAAGGAATATGGTGAAGAGCTCACTGCTGAAACGTTAGAAAATGTCACAGGGGGTGATTTTGTATCTAGCCCTCAAACCTTAACTGAACGATTGGGTTGGAATAGATGGTGGTTGAAAATAAAATACCCTTATGGTGATTAG	MRTKEYGEELTAETLENVTGGDFVSSPQTLTERLGWNRWWLKIKYPYGD*	MRTKEYGEELTAETLENVTGG	DFVSSPQTLTERLGWNRWWLKIKYPYGD*	21	29	-0.846429	3454.75	9.12072	1.00093
F6-1	1732907	1733137	231	GTAGTGACATAAATGTCACTACTTTTTTG	ATGACAACACAAATCATTAACAATTTTTATTCACTTAATTCCGAAGATCTTTCTACTGTTAAGGGGGGAGCATGTAGTTTTTGGGGAGCTACAGCTGCCGTAGGTGTCGGGGCTGTTGGAGGAGCCGTTAAAGGTGGTATTCAAACAGGTACTTGGCAAGGTGCAGCCTTAAAGGGTATTGGTTATGGTATTAAAGGTGGGATTACTTATGGCCTTACTTGTCGTTATTAG	MTTQIINNFYSLNSEDLSTVKGGACSFWGATAAVGVGAVGGAVKGGIQTGTWQGAALKGIGYGIKGGITYGLTCRY*	MTTQIINNFYSLNSEDLSTVKGG	ACSFWGATAAVGVGAVGGAVKGGIQTGTWQGAALKGIGYGIKGGITYGLTCRY*	23	54	0.479245	5119.62	9.74961	3.93583
F6-1	1741506	1741685	180	GTGGTGACATTTATGTCACTACTTTTTTG	ATGACAACACAAACAATTAACACTTTTGAAACACTCGATCTTGAGGCACTTGCAAACGTTGAAGGTGGCGGATGGGTTAAGTGTTATGCCGGCACAATTGGCTCTGCTCTAGTAGGATCAGCAGGAGGCCCGGTAGGTTACTGGGGAGGAGCTTTAGTTGGTTACGCCACATTCTGCTAA	MTTQTINTFETLDLEALANVEGGGWVKCYAGTIGSALVGSAGGPVGYWGGALVGYATFC*	MTTQTINTFETLDLEALANVEGG	GWVKCYAGTIGSALVGSAGGPVGYWGGALVGYATFC*	23	37	0.763889	3494.68	8.2049	0.936154
HS0302	527076	527306	231	GTAGTGACATAAATGTCACTACTTTTTTG	ATGACAACACAAATCATTAACAATTTTAACTCACTTAATTCCGAAGATCTTTCTACTGTTAAGGGTGGAGCATGTAGTTTTTGGGGAGCTACAGCTGCCGTAGGCGTCGGGGCTGTTGGAGGAGCCATTAAAGGTGGTATTCAAACAGGTACTTGGCAAGGTGCAGCCTTAAAGGGTATTGGTTATGGTATTAAAGATGGGATTACTTATGGCCTTATTTGTCGTTATTAG	MTTQIINNFNSLNSEDLSTVKGGACSFWGATAAVGVGAVGGAIKGGIQTGTWQGAALKGIGYGIKDGITYGLICRY*	MTTQIINNFNSLNSEDLSTVKGG	ACSFWGATAAVGVGAVGGAIKGGIQTGTWQGAALKGIGYGIKDGITYGLICRY*	23	54	0.524528	5203.67	9.26645	2.93663
HS0302	535665	535892	228	GTGGTGACATTTATGTCACTACTTTTTTG	ATGACAACACAAACAATTAACACTTTTGAAACGCTCGATTTCGAGGCACTTGCAAACGTTGAAGGTGGAAAAGTCAATTGGGACCGCTTATCTAGTAGCGCTAGTGGTGCTGCTGAAGGGATTTACTTCTGTGCCGCATCAGGTGCCCCACTCTTTACGCTTGCACCTTATGCTATTGTAGGGTGTGGAGTTGTCGGAGCTGGTCTTGGTTATGCTTTCCCACATTAA	MTTQTINTFETLDFEALANVEGGKVNWDRLSSSASGAAEGIYFCAASGAPLFTLAPYAIVGCGVVGAGLGYAFPH*	MTTQTINTFETLDFEALANVEGG	KVNWDRLSSSASGAAEGIYFCAASGAPLFTLAPYAIVGCGVVGAGLGYAFPH*	23	53	0.630769	5188.56	7.24779	0.178455
HS0302	254599	254799	201	ATAGTGACATTTATGTCACTATTTTTTAT	TTGAAAACATCAGAAATGACACAACAAGTATTGACACATCAGGAATTATCAGTGGTTGTAGGTGGTGGATGTAGTTGGAACAATGCAGCTAAGGCAGCCCTCGGAACAAGTATCACGGGTCTTATCACTAGTGGCCCAGGAGGAGCTTTATTGGGATTAGCTGGAGGAGCAGTAAGTTACGGAGCGTTGTGTTGGGTATGA	LKTSEMTQQVLTHQELSVVVGGGCSWNNAAKAALGTSITGLITSGPGGALLGLAGGAVSYGALCWV*	LKTSEMTQQVLTHQELSVVVGG	GCSWNNAAKAALGTSITGLITSGPGGALLGLAGGAVSYGALCWV*	22	45	0.788636	4105.08	8.22118	0.937741
HS0302	254614	254799	186	ATAGTGACATTTATGTCACTATTTTTTAT	ATGACACAACAAGTATTGACACATCAGGAATTATCAGTGGTTGTAGGTGGTGGATGTAGTTGGAACAATGCAGCTAAGGCAGCCCTCGGAACAAGTATCACGGGTCTTATCACTAGTGGCCCAGGAGGAGCTTTATTGGGATTAGCTGGAGGAGCAGTAAGTTACGGAGCGTTGTGTTGGGTATGA	MTQQVLTHQELSVVVGGGCSWNNAAKAALGTSITGLITSGPGGALLGLAGGAVSYGALCWV*	MTQQVLTHQELSVVVGG	GCSWNNAAKAALGTSITGLITSGPGGALLGLAGGAVSYGALCWV*	17	45	0.788636	4105.08	8.22118	0.937741
HS0302	265981	266130	150	ATAGTGACATTTATGTCACTATTTTTTTG	ATGCGAACTAAGGCATATGGTGAAGAGCTCAATGCTGAAACCTTAGAAAATGTTACAGGGGGTGGTTTTGTATCTAAACCTCAAACCTTACCTGAACGATTGGGTTGGAACAAATGGTGGTTGAAAAGAAGACCTCCTTATGGCGATTAG	MRTKAYGEELNAETLENVTGGGFVSKPQTLPERLGWNKWWLKRRPPYGD*	MRTKAYGEELNAETLENVTGG	GFVSKPQTLPERLGWNKWWLKRRPPYGD*	21	29	-1.21071	3410.82	11.0904	4.00077
HS0302	948015	948182	168	ATGGTGACATTTATGTCACTACTTTTTTA	ATGACTAAGACCATTAACAATCGTAAAAACATGACTACTCAAGAACTTGAAGCTGTATCAGGTGGAGTGGTTCCTTGGGCCGCTATTTCTGTTGGCATTGCTGCTGCAAAACTGACTTATGACCTTAGCTATGCTGCAGGTAAGTCTTTCTATAACCTCACCCACTAA	MTKTINNRKNMTTQELEAVSGGVVPWAAISVGIAAAKLTYDLSYAAGKSFYNLTH*	MTKTINNRKNMTTQELEAVSGG	VVPWAAISVGIAAAKLTYDLSYAAGKSFYNLTH*	22	34	0.587879	3496.84	9.03496	1.23835
HS0302	947831	947995	165	ATGGTGACATTTATGTCACTACTTTTTTA	ATGACAATGATTAATAAAGAAATGAAGGCAGCTGACCTAGCCTCAGTAACAGGAGGCGGATGGAAGACTAACCTTGCCATTGGAGGGCTCTGCCTAGCTTCAGGACCTATTGGAACTATGGTATGCCTTGGAGCCTACAATGGCTACATGGACTCTGCGCGATAA	MTMINKEMKAADLASVTGGGWKTNLAIGGLCLASGPIGTMVCLGAYNGYMDSAR*	MTMINKEMKAADLASVTGG	GWKTNLAIGGLCLASGPIGTMVCLGAYNGYMDSAR*	19	36	0.417143	3559.71	8.21289	0.937738
HS0302	947837	947995	159	ATGGTGACATTTATGTCACTACTTTTTTA	ATGATTAATAAAGAAATGAAGGCAGCTGACCTAGCCTCAGTAACAGGAGGCGGATGGAAGACTAACCTTGCCATTGGAGGGCTCTGCCTAGCTTCAGGACCTATTGGAACTATGGTATGCCTTGGAGCCTACAATGGCTACATGGACTCTGCGCGATAA	MINKEMKAADLASVTGGGWKTNLAIGGLCLASGPIGTMVCLGAYNGYMDSAR*	MINKEMKAADLASVTGG	GWKTNLAIGGLCLASGPIGTMVCLGAYNGYMDSAR*	17	36	0.417143	3559.71	8.21289	0.937738
K12	2252823	2252990	168	ATAGTGACATTTATGTCACTACTTTTTTA	ATGACTAAGACAATTAACAATCGTAAACACATGACTACTCAAGAACTTGAAGCTGTATCAGGTGGAGTGGTTCCTTGGGTGGCTATTTCTGTTGGCATGGCTGCTGCAAAACTGACTTATGACCTTAGCTATGCTGCGGGTAAATCTTTCTATAACCTCACCCACTAA	MTKTINNRKHMTTQELEAVSGGVVPWVAISVGMAAAKLTYDLSYAAGKSFYNLTH*	MTKTINNRKHMTTQELEAVSGG	VVPWVAISVGMAAAKLTYDLSYAAGKSFYNLTH*	22	34	0.581818	3542.83	9.03496	1.23835
K12	2252644	2252802	159	ATAGTGACATTTATGTCACTACTTTTTTA	ATGACTAACAAAGAAATGAACACTTCTGATTTAGCCTCAGTAACAGGAGGCGGATGGAAGACTAACCTTGCCGTTGGAGGGCTCTGCCTAGCTTCAGGACCTATTGGAACTATGATTTGCCTTGGTGCCTACAACGGCTACATGGACTCTGCACGATAA	MTNKEMNTSDLASVTGGGWKTNLAVGGLCLASGPIGTMICLGAYNGYMDSAR*	MTNKEMNTSDLASVTGG	GWKTNLAVGGLCLASGPIGTMICLGAYNGYMDSAR*	17	36	0.417143	3559.71	8.21289	0.937738
K12	299231	299380	150	GTAGTGACATTTATGTCACTATTTTTTTG	ATGCGAACTAAGGTATATGGTGAAGAGCTCAATGCTGACACCTTAGAAAATGTTACAGGGGGTGGTTTTGTATCTAAACCTCAAACCTTACCTGAACGATTGGGTTGGAACAAATGGTGGTTGAAAAGAAGACCTCCTTATGGCGATTAG	MRTKVYGEELNADTLENVTGGGFVSKPQTLPERLGWNKWWLKRRPPYGD*	MRTKVYGEELNADTLENVTGG	GFVSKPQTLPERLGWNKWWLKRRPPYGD*	21	29	-1.21071	3410.82	11.0904	4.00077
K12	363994	364224	231	GTAGTGACATAAATGTCACTATTTTTTTG	ATGACAACACAAATCATTAACAATTTTAATTCACTTAATTCCGAAGATCTTTCTACTGTTAAGGGGGGAGCATGTAGTTTTTGGGGAGCTACAGCTGCCGTAGGTGTCGGGGCTGTTGGAGGAGCCGTTAAAGGTGGTATTCAAACAGGTACTTGGCAAGGTGCAGCCTTAAAGGGTATTGGTTATGGTATTAAAGGTGGGATTACTTATGGCCTTACTTGTCGTTATTAG	MTTQIINNFNSLNSEDLSTVKGGACSFWGATAAVGVGAVGGAVKGGIQTGTWQGAALKGIGYGIKGGITYGLTCRY*	MTTQIINNFNSLNSEDLSTVKGG	ACSFWGATAAVGVGAVGGAVKGGIQTGTWQGAALKGIGYGIKGGITYGLTCRY*	23	54	0.479245	5119.62	9.74961	3.93583
K12	372606	372785	180	GTAGTGACATTTATGTCACTACTTTTTTG	ATGACAACACAAACAATGAACAATTTTGAAACACTCGATCTCGAGGCACTTGCAAACGTTGAAGGTGGCGGATGGGTTAAGTGTTATGCCGGCACAATCGGATCTGCTCTAGTAGGATCAGCTGGAGGCCCAGTAGGTTACTGGGGAGGAGCTTTAGTTGGTTATGCCACATTCTGCTAA	MTTQTMNNFETLDLEALANVEGGGWVKCYAGTIGSALVGSAGGPVGYWGGALVGYATFC*	MTTQTMNNFETLDLEALANVEGG	GWVKCYAGTIGSALVGSAGGPVGYWGGALVGYATFC*	23	37	0.763889	3494.68	8.2049	0.936154
K12	372621	372785	165	GTAGTGACATTTATGTCACTACTTTTTTG	ATGAACAATTTTGAAACACTCGATCTCGAGGCACTTGCAAACGTTGAAGGTGGCGGATGGGTTAAGTGTTATGCCGGCACAATCGGATCTGCTCTAGTAGGATCAGCTGGAGGCCCAGTAGGTTACTGGGGAGGAGCTTTAGTTGGTTATGCCACATTCTGCTAA	MNNFETLDLEALANVEGGGWVKCYAGTIGSALVGSAGGPVGYWGGALVGYATFC*	MNNFETLDLEALANVEGG	GWVKCYAGTIGSALVGSAGGPVGYWGGALVGYATFC*	18	37	0.763889	3494.68	8.2049	0.936154
K12	477908	478048	141	TTAGTGACATCTATGTCACTATTTTTTTC	TTGTCTATCCCAGTAGCTATGGGTGTCCTCCACCTCTTTGGAGGTCCCCTTCTTGACCCAATGATAGCAGGACTTGCCATGAGCTTTAGCTCTGTTTCGGTCGTCCTTAATGCTCTGCGCCTCAAACGTCGCAAAGTCTAA	LSIPVAMGVLHLFGGPLLDPMIAGLAMSFSSVSVVLNALRLKRRKV*	LSIPVAMGVLHLFGG	PLLDPMIAGLAMSFSSVSVVLNALRLKRRKV*	15	32	0.677419	3380.95	12.2437	4.00047
KB005	503153	503320	168	ATGGTGACATTTATGTCACTACTTTTTTA	ATGACTAAGACCATTAACAATCGTAAAAACATGACTACTCAAGAACTTGAAGCTGTATCAGGTGGAGTGGTTCCTTGGGCCGCTATTTCTGTTGGCATTGCTGCTGCAAAACTGACTTATGACCTTAGCTATGCTGCAGGTAAGTCTTTCTATAACCTCACCCACTAA	MTKTINNRKNMTTQELEAVSGGVVPWAAISVGIAAAKLTYDLSYAAGKSFYNLTH*	MTKTINNRKNMTTQELEAVSGG	VVPWAAISVGIAAAKLTYDLSYAAGKSFYNLTH*	22	34	0.587879	3496.84	9.03496	1.23835
KB005	502969	503133	165	ATGGTGACATTTATGTCACTACTTTTTTA	ATGACAATGATTAATAAAGAAATGAAGGCAGCTGAGCTAGCCTCAGTAACAGGAGGCGGATGGAAGACCAACCTTGCCATTGGAGGGCTCTGCCTAGCTTCAGGACCTATTGGAACTATGGTATGCCTTGGAGCCTACAATGGCTATATGGACTCTGCACGATAA	MTMINKEMKAAELASVTGGGWKTNLAIGGLCLASGPIGTMVCLGAYNGYMDSAR*	MTMINKEMKAAELASVTGG	GWKTNLAIGGLCLASGPIGTMVCLGAYNGYMDSAR*	19	36	0.417143	3559.71	8.21289	0.937738
KB005	502975	503133	159	ATGGTGACATTTATGTCACTACTTTTTTA	ATGATTAATAAAGAAATGAAGGCAGCTGAGCTAGCCTCAGTAACAGGAGGCGGATGGAAGACCAACCTTGCCATTGGAGGGCTCTGCCTAGCTTCAGGACCTATTGGAACTATGGTATGCCTTGGAGCCTACAATGGCTATATGGACTCTGCACGATAA	MINKEMKAAELASVTGGGWKTNLAIGGLCLASGPIGTMVCLGAYNGYMDSAR*	MINKEMKAAELASVTGG	GWKTNLAIGGLCLASGPIGTMVCLGAYNGYMDSAR*	17	36	0.417143	3559.71	8.21289	0.937738
KB005	181677	181913	237	GTGGTGACATTAATGTCACTACTTTTTTG	ATGACAACACAAATCATTAACAATTTTAATTCACTTAATTCCGAAGATCTTTCTATTATCGAAGGTGGGGGTGTGATTGGTTGTGTAGCTGGGACTGCTGGATCTGCTGGGCTTGGATTTTTGACTGGAACATCAGTTGGAACTGTTACATTTCCAATTGTTGGGACTGTCTCAGGTGGAGCATTTGGGGCATGGTCAGGAGCTGGCCTTGGAATGGCTACATTTTGCGGAGTTTAG	MTTQIINNFNSLNSEDLSIIEGGGVIGCVAGTAGSAGLGFLTGTSVGTVTFPIVGTVSGGAFGAWSGAGLGMATFCGV*	MTTQIINNFNSLNSEDLSIIEGG	GVIGCVAGTAGSAGLGFLTGTSVGTVTFPIVGTVSGGAFGAWSGAGLGMATFCGV*	23	56	1.15455	4950.44	5.826	-0.0613069
KB005	190304	190534	231	GTGGTGACATTTATGTCACTACTTTTTTG	ATGACAACACAAACAATGAACACTTTTGAAACACTCGATCTCGAGGCACTTGCAAACGTTGAAGGTGGTGGATGTAGCTGGGGAGGTTTTGCTAAACAAGGAGTAGCTACAGGAGTTGGTAATGGTTTACGATTAGGTATCAAAACACGTACTTGGCAAGGTGCTGTCGCAGGAGCAGCTGGAGGTGCTATCGTAGGGGGTGTTGGTTATGGAGCAACATGCTGGTGGTGA	MTTQTMNTFETLDLEALANVEGGGCSWGGFAKQGVATGVGNGLRLGIKTRTWQGAVAGAAGGAIVGGVGYGATCWW*	MTTQTMNTFETLDLEALANVEGG	GCSWGGFAKQGVATGVGNGLRLGIKTRTWQGAVAGAAGGAIVGGVGYGATCWW*	23	54	0.332075	5136.57	10.2636	3.93758
KB005	190319	190534	216	GTGGTGACATTTATGTCACTACTTTTTTG	ATGAACACTTTTGAAACACTCGATCTCGAGGCACTTGCAAACGTTGAAGGTGGTGGATGTAGCTGGGGAGGTTTTGCTAAACAAGGAGTAGCTACAGGAGTTGGTAATGGTTTACGATTAGGTATCAAAACACGTACTTGGCAAGGTGCTGTCGCAGGAGCAGCTGGAGGTGCTATCGTAGGGGGTGTTGGTTATGGAGCAACATGCTGGTGGTGA	MNTFETLDLEALANVEGGGCSWGGFAKQGVATGVGNGLRLGIKTRTWQGAVAGAAGGAIVGGVGYGATCWW*	MNTFETLDLEALANVEGG	GCSWGGFAKQGVATGVGNGLRLGIKTRTWQGAVAGAAGGAIVGGVGYGATCWW*	18	54	0.332075	5136.57	10.2636	3.93758
KB005	2207780	2207929	150	ATAGTGACATTTATGTCACTATTTTTTTG	ATGCGAACTAAGGTATATGGCGAAGAGCTCACTGCTGAAACGTTAGAAAATGTCACAGGGGGTGATTTTGTATCTAGACCTCAAACCTTACCTGAACGATTGGGTTGGAACAAATGGTGGTTGAAAAGAAAATACCCTTATGGTGATTAA	MRTKVYGEELTAETLENVTGGDFVSRPQTLPERLGWNKWWLKRKYPYGD*	MRTKVYGEELTAETLENVTGG	DFVSRPQTLPERLGWNKWWLKRKYPYGD*	21	29	-1.31071	3534.83	10.3219	3.00077
M18	214697	214864	168	ATGGTGACATTTATGTCACTACTTTTTTA	ATGACTAAGACCATTAACAATCGTAAAAACATGACTACTCAAGAACTTGAAACTGTATCAGGTGGAGTGGTTCCTTGGGCCGCTATTTCTGTTGGCATTGCTGCTGCAAAACTAACTTATGACCTTAGCTATGCTGCAGGTAAGTCTTTCTATAACCTCACCCACTAA	MTKTINNRKNMTTQELETVSGGVVPWAAISVGIAAAKLTYDLSYAAGKSFYNLTH*	MTKTINNRKNMTTQELETVSGG	VVPWAAISVGIAAAKLTYDLSYAAGKSFYNLTH*	22	34	0.587879	3496.84	9.03496	1.23835
M18	214513	214677	165	ATGGTGACATTTATGTCACTACTTTTTTA	ATGACAATGATTAACAAAGAAATGAAGGCAGCTGACCTAGCCTCAGTAACAGGAGGCGGATGGAAGACTAACCTTGCCATTGGAGGGCTCTGCCTAGCTTCAGGACCTATTGGAACTATGGTATGCCTTGGAGCCTACAATGGCTACATGGACTCTGCGAGATAA	MTMINKEMKAADLASVTGGGWKTNLAIGGLCLASGPIGTMVCLGAYNGYMDSAR*	MTMINKEMKAADLASVTGG	GWKTNLAIGGLCLASGPIGTMVCLGAYNGYMDSAR*	19	36	0.417143	3559.71	8.21289	0.937738
M18	214519	214677	159	ATGGTGACATTTATGTCACTACTTTTTTA	ATGATTAACAAAGAAATGAAGGCAGCTGACCTAGCCTCAGTAACAGGAGGCGGATGGAAGACTAACCTTGCCATTGGAGGGCTCTGCCTAGCTTCAGGACCTATTGGAACTATGGTATGCCTTGGAGCCTACAATGGCTACATGGACTCTGCGAGATAA	MINKEMKAADLASVTGGGWKTNLAIGGLCLASGPIGTMVCLGAYNGYMDSAR*	MINKEMKAADLASVTGG	GWKTNLAIGGLCLASGPIGTMVCLGAYNGYMDSAR*	17	36	0.417143	3559.71	8.21289	0.937738
M18	768441	768590	150	GTAGTGACATTTATGTCACTATTTTTTTG	ATGCGAACTAAGGTATATGGTGAAGAGCTCAATGCTGAAAGCTTAGAAAATGTTACAGGGGGTGGTTTTGTATCTAAACCTCAAACCTTACCTGAACGATTGGGTTGGAACAAATGGTGGTTGAAAAGAAGACCTCCTTATGGCGATTAG	MRTKVYGEELNAESLENVTGGGFVSKPQTLPERLGWNKWWLKRRPPYGD*	MRTKVYGEELNAESLENVTGG	GFVSKPQTLPERLGWNKWWLKRRPPYGD*	21	29	-1.21071	3410.82	11.0904	4.00077
M18	835086	835322	237	GTGGTGACATTAATGTCACTACTTTTTTG	ATGACAACACAAATCATTAACAATTTTAATTCACTTAATTCCGAAGATCTTTCTATTATCGAAGGTGGGGGTGTGATTGGTTGTGTAGCTGGGACTGCTGGATCTGCTGGGCTTGGATTTTTGACTGGAACATCAGTTGGAACTGTTACATTTCCAATTGTTGGGACTGTCTCAGGTGGAGCATTTGGGGCATGGTCAGGAGCTGGCCTTGGAATGGCTACATTTTGCGGAGTTTAG	MTTQIINNFNSLNSEDLSIIEGGGVIGCVAGTAGSAGLGFLTGTSVGTVTFPIVGTVSGGAFGAWSGAGLGMATFCGV*	MTTQIINNFNSLNSEDLSIIEGG	GVIGCVAGTAGSAGLGFLTGTSVGTVTFPIVGTVSGGAFGAWSGAGLGMATFCGV*	23	56	1.15455	4950.44	5.826	-0.0613069
M18	843714	843893	180	GTGGTGACATTTATGTCACTACTTTTTTG	ATGACAACACAAACAATGAACACTTTTGAAACACTCGATCTCGAGACACTTGCAAACGTTGAAGGTGGCGGATGGGTTAAGTGTTATGCCGGCACAATTGGCTCTGCTCTAGTAGGATCAGCAGGAGGCCCGGTAGGTTACTGGGGAGGAGCTTTAGTTGGCTATGCTACATTCTGCTAA	MTTQTMNTFETLDLETLANVEGGGWVKCYAGTIGSALVGSAGGPVGYWGGALVGYATFC*	MTTQTMNTFETLDLETLANVEGG	GWVKCYAGTIGSALVGSAGGPVGYWGGALVGYATFC*	23	37	0.763889	3494.68	8.2049	0.936154
M18	843729	843893	165	GTGGTGACATTTATGTCACTACTTTTTTG	ATGAACACTTTTGAAACACTCGATCTCGAGACACTTGCAAACGTTGAAGGTGGCGGATGGGTTAAGTGTTATGCCGGCACAATTGGCTCTGCTCTAGTAGGATCAGCAGGAGGCCCGGTAGGTTACTGGGGAGGAGCTTTAGTTGGCTATGCTACATTCTGCTAA	MNTFETLDLETLANVEGGGWVKCYAGTIGSALVGSAGGPVGYWGGALVGYATFC*	MNTFETLDLETLANVEGG	GWVKCYAGTIGSALVGSAGGPVGYWGGALVGYATFC*	18	37	0.763889	3494.68	8.2049	0.936154
MGYG-HGUT-00113	1354479	1354709	231	GTAGTGACATTTATGTCACTACTTTTTTG	ATGACAACACAAATCATTAACAATTTTAACTCACTTAATTCCGAAGATCTTTCTACTGTTAAGGGTGGAGCATGTAGTTTTTGGGGAGCTACAGCTGCCGTAGGCGTCGGGGCTGTTGGAGGAGCCATTAAAGGTGGTATTCAAACAGGTACTTGGCAAGGTGCAGCCTTAAAGGGTATTGGTTATGGTATTAAAGATGGGATTACTTATGAACTTATTTGTCGTTATTAG	MTTQIINNFNSLNSEDLSTVKGGACSFWGATAAVGVGAVGGAIKGGIQTGTWQGAALKGIGYGIKDGITYELICRY*	MTTQIINNFNSLNSEDLSTVKGG	ACSFWGATAAVGVGAVGGAIKGGIQTGTWQGAALKGIGYGIKDGITYELICRY*	23	54	0.466038	5275.69	8.73953	1.93788
MGYG-HGUT-00113	1363096	1363326	231	GTAGTGACATTTATGTCACTACTTTTTTG	ATGACAACACAAACAATGAACAATTTTGAGACACTCGATCTCGAGGCACTTGCAAACGTTGAAGGTGGTGGATGTAGCTGGGGAGGTTTTGCTAAACAAGGAGTAGCTACAGGAGTTGGTAATGGTTTACGACTAGGTATCAAAACACGTACTTGGCAAGGTGCTGTTGCAGGAGCAGCTGGAGGTGCTATCGTAGGTGGTGTTGGTTATGGAGCAACATGCTGGTGGTGA	MTTQTMNNFETLDLEALANVEGGGCSWGGFAKQGVATGVGNGLRLGIKTRTWQGAVAGAAGGAIVGGVGYGATCWW*	MTTQTMNNFETLDLEALANVEGG	GCSWGGFAKQGVATGVGNGLRLGIKTRTWQGAVAGAAGGAIVGGVGYGATCWW*	23	54	0.332075	5136.57	10.2636	3.93758
MGYG-HGUT-00113	1363111	1363326	216	GTAGTGACATTTATGTCACTACTTTTTTG	ATGAACAATTTTGAGACACTCGATCTCGAGGCACTTGCAAACGTTGAAGGTGGTGGATGTAGCTGGGGAGGTTTTGCTAAACAAGGAGTAGCTACAGGAGTTGGTAATGGTTTACGACTAGGTATCAAAACACGTACTTGGCAAGGTGCTGTTGCAGGAGCAGCTGGAGGTGCTATCGTAGGTGGTGTTGGTTATGGAGCAACATGCTGGTGGTGA	MNNFETLDLEALANVEGGGCSWGGFAKQGVATGVGNGLRLGIKTRTWQGAVAGAAGGAIVGGVGYGATCWW*	MNNFETLDLEALANVEGG	GCSWGGFAKQGVATGVGNGLRLGIKTRTWQGAVAGAAGGAIVGGVGYGATCWW*	18	54	0.332075	5136.57	10.2636	3.93758
MGYG-HGUT-00113	411211	411360	150	ATAGTGACATTTATGTCACTATTTTTTTG	ATGCGAACTAAGGTATATGGCGAAGAGCTCACTACTGAAACGTTAGAAAATGTCACAGGGGGTGATTTTGTATCTAGACCTCAAACCTTACCTGAACGATTGGGTTGGAATAGATGGTGGTTGAAAAGAAAATATCCTTATGGTGATTAG	MRTKVYGEELTTETLENVTGGDFVSRPQTLPERLGWNRWWLKRKYPYGD*	MRTKVYGEELTTETLENVTGG	DFVSRPQTLPERLGWNRWWLKRKYPYGD*	21	29	-1.33214	3562.84	10.4397	3.00093
MGYG-HGUT-00113	1213284	1213451	168	ATGGTGACATTTATGTCACTACTTTTTTA	ATGACTAAGACCATTAACAATCGTAAAAACATGACTACTCAAGAACTTGAAGCTGTATCAGGTGGAGTGGTTCCTTGGGCCGCTATTTCTGTTGGCATTGCTGCTGCAAAACTGACTTATGACCTTAGCTATGCTGCAGGTAAGTCTTTCTATAACCTCACCCACTAA	MTKTINNRKNMTTQELEAVSGGVVPWAAISVGIAAAKLTYDLSYAAGKSFYNLTH*	MTKTINNRKNMTTQELEAVSGG	VVPWAAISVGIAAAKLTYDLSYAAGKSFYNLTH*	22	34	0.587879	3496.84	9.03496	1.23835
MGYG-HGUT-00113	1213100	1213264	165	ATGGTGACATTTATGTCACTACTTTTTTA	ATGACAGTGATTAACAAAGAAATGAAGGCAGCTGACCTAGCCTCAGTAACAGGAGGCGGATGGAAGACTAACCTTGCCATTGGAGGGCTCTGCCTAGCTTCAAGACCTATTGGAACTATGGTATGCCTTGGAGCCTACAATGGCTACATGGACTCTGCGCGATAA	MTVINKEMKAADLASVTGGGWKTNLAIGGLCLASRPIGTMVCLGAYNGYMDSAR*	MTVINKEMKAADLASVTGG	GWKTNLAIGGLCLASRPIGTMVCLGAYNGYMDSAR*	19	36	0.3	3658.79	8.77177	1.93773
MGYG-HGUT-00113	1213106	1213264	159	ATGGTGACATTTATGTCACTACTTTTTTA	GTGATTAACAAAGAAATGAAGGCAGCTGACCTAGCCTCAGTAACAGGAGGCGGATGGAAGACTAACCTTGCCATTGGAGGGCTCTGCCTAGCTTCAAGACCTATTGGAACTATGGTATGCCTTGGAGCCTACAATGGCTACATGGACTCTGCGCGATAA	VINKEMKAADLASVTGGGWKTNLAIGGLCLASRPIGTMVCLGAYNGYMDSAR*	VINKEMKAADLASVTGG	GWKTNLAIGGLCLASRPIGTMVCLGAYNGYMDSAR*	17	36	0.3	3658.79	8.77177	1.93773
MIT 14-1770-C1	115639	115806	168	ATGGTGACATTTATGTCACTACTTTTTTA	ATGACTAAGACCATTAACAATCGTAAAAACATGACTACTCAAGAACTTGAAACTGTATCAGGTGGAGTGGTTCCTTGGGCCGCTATTTCTGTTGGCATTGCTGCTGCAAAACTGACTTATGACCTTAGCTATGCTGCAGGTAAGTCTTTCTATAACCTCACCCACTAA	MTKTINNRKNMTTQELETVSGGVVPWAAISVGIAAAKLTYDLSYAAGKSFYNLTH*	MTKTINNRKNMTTQELETVSGG	VVPWAAISVGIAAAKLTYDLSYAAGKSFYNLTH*	22	34	0.587879	3496.84	9.03496	1.23835
MIT 14-1770-C1	115455	115619	165	ATGGTGACATTTATGTCACTACTTTTTTA	ATGACAATGATTAACAAAGAAATGAAGGCAGCTGACCTAGCCTCAGTAACAGGAGGCGGATGGAAGACTAACCTTGCCATTGGAGGGCTCTGCCTAGCTTCAGGACCTATTGGAACTATGGTATGCCTTGGAGCCTACAATGGCTACATGGACTCTGCGAGATAA	MTMINKEMKAADLASVTGGGWKTNLAIGGLCLASGPIGTMVCLGAYNGYMDSAR*	MTMINKEMKAADLASVTGG	GWKTNLAIGGLCLASGPIGTMVCLGAYNGYMDSAR*	19	36	0.417143	3559.71	8.21289	0.937738
MIT 14-1770-C1	115461	115619	159	ATGGTGACATTTATGTCACTACTTTTTTA	ATGATTAACAAAGAAATGAAGGCAGCTGACCTAGCCTCAGTAACAGGAGGCGGATGGAAGACTAACCTTGCCATTGGAGGGCTCTGCCTAGCTTCAGGACCTATTGGAACTATGGTATGCCTTGGAGCCTACAATGGCTACATGGACTCTGCGAGATAA	MINKEMKAADLASVTGGGWKTNLAIGGLCLASGPIGTMVCLGAYNGYMDSAR*	MINKEMKAADLASVTGG	GWKTNLAIGGLCLASGPIGTMVCLGAYNGYMDSAR*	17	36	0.417143	3559.71	8.21289	0.937738
MIT 14-1770-C1	671401	671550	150	ATAGTGACATTTATGTCACTATTTTTTTG	ATGCGAACTAAGGTATATGGCGAAGAGCTCACTGCTGAAACGTTAGAAAATGTCACAGGGGGTGATTTTGTATCTAGACCTCAAACCTTACCTGAACGATTGGGTTGGAACAAATGGTGGTTGAAAAGAAAATACCCTTATGGTGATTAA	MRTKVYGEELTAETLENVTGGDFVSRPQTLPERLGWNKWWLKRKYPYGD*	MRTKVYGEELTAETLENVTGG	DFVSRPQTLPERLGWNKWWLKRKYPYGD*	21	29	-1.31071	3534.83	10.3219	3.00077
MIT 14-1770-C1	740545	740778	234	GTGGTGACATTTATGTCACTACTTTTTTG	ATGACAACACAAACAATGAACACTTTTGAAACACTCGATCTCGAGACACTTGCAAACGTTGAAGGTGGAAATAGATGTAAAGATTTAATCTTTGGAGGAGCTTTAACTGGCGCAGGTGCTGGATTTACAGGTGGTATGGTAGCATTTGGTGTTACAGCATTTCCAGGAGCATTTGTAGGAGCACATGTTGGAGCAGTTGCTGGTGGGCTAGCATGTATCGGAGCGAGCTTTTAG	MTTQTMNTFETLDLETLANVEGGNRCKDLIFGGALTGAGAGFTGGMVAFGVTAFPGAFVGAHVGAVAGGLACIGASF*	MTTQTMNTFETLDLETLANVEGG	NRCKDLIFGGALTGAGAGFTGGMVAFGVTAFPGAFVGAHVGAVAGGLACIGASF*	23	55	1.04074	5015.5	8.24126	1.17958
MIT 14-1770-C1	740560	740778	219	GTGGTGACATTTATGTCACTACTTTTTTG	ATGAACACTTTTGAAACACTCGATCTCGAGACACTTGCAAACGTTGAAGGTGGAAATAGATGTAAAGATTTAATCTTTGGAGGAGCTTTAACTGGCGCAGGTGCTGGATTTACAGGTGGTATGGTAGCATTTGGTGTTACAGCATTTCCAGGAGCATTTGTAGGAGCACATGTTGGAGCAGTTGCTGGTGGGCTAGCATGTATCGGAGCGAGCTTTTAG	MNTFETLDLETLANVEGGNRCKDLIFGGALTGAGAGFTGGMVAFGVTAFPGAFVGAHVGAVAGGLACIGASF*	MNTFETLDLETLANVEGG	NRCKDLIFGGALTGAGAGFTGGMVAFGVTAFPGAFVGAHVGAVAGGLACIGASF*	18	55	1.04074	5015.5	8.24126	1.17958
MIT 14-1770-C1	740791	740979	189	GTGGTGACATTTATGTCACTACTTTTTTG	ATGAATGTGACTAAGTATAATAAGATGTGCGATGCTGAGCTAGAAATTATTTCTGGTGGTGGGAAAGTTGGAGCAGTAATTGGTGGCTGTCTAGGTGGTATGCTCATGGCATGGGCAGCAGGACCTGTTTCCGCAGGGGGTTATACTATGATATGTGCTACTTCGGGGCTTGCAAATGCTTATTTTTGA	MNVTKYNKMCDAELEIISGGGKVGAVIGGCLGGMLMAWAAGPVSAGGYTMICATSGLANAYF*	MNVTKYNKMCDAELEIISGG	GKVGAVIGGCLGGMLMAWAAGPVSAGGYTMICATSGLANAYF*	20	43	0.985714	3992.91	8.21291	0.936947
MIT 14-1770-C1	740797	740979	183	GTGGTGACATTTATGTCACTACTTTTTTG	GTGACTAAGTATAATAAGATGTGCGATGCTGAGCTAGAAATTATTTCTGGTGGTGGGAAAGTTGGAGCAGTAATTGGTGGCTGTCTAGGTGGTATGCTCATGGCATGGGCAGCAGGACCTGTTTCCGCAGGGGGTTATACTATGATATGTGCTACTTCGGGGCTTGCAAATGCTTATTTTTGA	VTKYNKMCDAELEIISGGGKVGAVIGGCLGGMLMAWAAGPVSAGGYTMICATSGLANAYF*	VTKYNKMCDAELEIISGG	GKVGAVIGGCLGGMLMAWAAGPVSAGGYTMICATSGLANAYF*	18	43	0.985714	3992.91	8.21291	0.936947
NU10	1785580	1785750	171	TTAGTGACATGAATGTCACTATTTTTTTC	ATGTTAGAAATAAATATGATTTATTCTGATTTATCACTTACTGAACTTGCTCAAATTAATGGGGGAGGAATTCTGTCAAGTGTAGCTGGACTTGTTAAAGATACCTGGGGAACGTTATATTCTACAGGAAGAGACTTTGGACGTAGCGTTGTTAACGCTGCTATGCCTTAA	MLEINMIYSDLSLTELAQINGGGILSSVAGLVKDTWGTLYSTGRDFGRSVVNAAMP*	MLEINMIYSDLSLTELAQINGG	GILSSVAGLVKDTWGTLYSTGRDFGRSVVNAAMP*	22	35	0.244118	3524.81	9.2964	1.00063
NU10	1785762	1785932	171	TTAGTGACATGAATGTCACTATTTTTTTC	ATGTATAGAGAAAAGAGAAATGATGAAGAACTGAATATTAATGATCTTGCCATGATTAATGGTGGAGTAGCCCCTGTAGTTATTGCTGTAGGGGTAGTTGCGACACCATTCGTACTGGGCGCGATTGCTGGAGGCGCAGATGAGTACGCAAGAAAGAGAGGGCATCACTGA	MYREKRNDEELNINDLAMINGGVAPVVIAVGVVATPFVLGAIAGGADEYARKRGHH*	MYREKRNDEELNINDLAMINGG	VAPVVIAVGVVATPFVLGAIAGGADEYARKRGHH*	22	35	0.708824	3396.88	9.30118	1.4816
NU10	1785595	1785750	156	TTAGTGACATGAATGTCACTATTTTTTTC	ATGATTTATTCTGATTTATCACTTACTGAACTTGCTCAAATTAATGGGGGAGGAATTCTGTCAAGTGTAGCTGGACTTGTTAAAGATACCTGGGGAACGTTATATTCTACAGGAAGAGACTTTGGACGTAGCGTTGTTAACGCTGCTATGCCTTAA	MIYSDLSLTELAQINGGGILSSVAGLVKDTWGTLYSTGRDFGRSVVNAAMP*	MIYSDLSLTELAQINGG	GILSSVAGLVKDTWGTLYSTGRDFGRSVVNAAMP*	17	35	0.244118	3524.81	9.2964	1.00063
NU10	846301	846459	159	GTAGTGACATTTATGTCACTATTTTTTTG	ATGTATATGGATACAATGATGATGGATAAATTTGATTCTTTAACCTTTGATAAGCTTTCTGAAATTGTTGGGGGAAATGTAGCATATGACATTGGTTATGGAGTTGGACAAGTAAGTTATATTGCAGTTGAGATTTTAAAACTTAGAAAAATAAGATAG	MYMDTMMMDKFDSLTFDKLSEIVGGNVAYDIGYGVGQVSYIAVEILKLRKIR*	MYMDTMMMDKFDSLTFDKLSEIVGG	NVAYDIGYGVGQVSYIAVEILKLRKIR*	25	28	0.344444	3036.71	9.73602	1.99935
NU10	846307	846459	153	GTAGTGACATTTATGTCACTATTTTTTTG	ATGGATACAATGATGATGGATAAATTTGATTCTTTAACCTTTGATAAGCTTTCTGAAATTGTTGGGGGAAATGTAGCATATGACATTGGTTATGGAGTTGGACAAGTAAGTTATATTGCAGTTGAGATTTTAAAACTTAGAAAAATAAGATAG	MDTMMMDKFDSLTFDKLSEIVGGNVAYDIGYGVGQVSYIAVEILKLRKIR*	MDTMMMDKFDSLTFDKLSEIVGG	NVAYDIGYGVGQVSYIAVEILKLRKIR*	23	28	0.344444	3036.71	9.73602	1.99935
NU10	846145	846294	150	GTAGTGACATTTATGTCACTATTTTTTTG	ATGAAAAATACATTTCAAAAAATTGATATTAAAGATTTAGCAATTGTAGTTGGTGGAAGTATTTACTCATCTGTAGGATATGGAGTCGGAGTAGTTACTCACACGGTTTATGATTTTGGTCGTGGATTTGTAGATGGATTTAGAGGTTAA	MKNTFQKIDIKDLAIVVGGSIYSSVGYGVGVVTHTVYDFGRGFVDGFRG*	MKNTFQKIDIKDLAIVVGG	SIYSSVGYGVGVVTHTVYDFGRGFVDGFRG*	19	31	0.28	3197.56	7.52846	0.239453
NU10	846316	846459	144	GTAGTGACATTTATGTCACTATTTTTTTG	ATGATGATGGATAAATTTGATTCTTTAACCTTTGATAAGCTTTCTGAAATTGTTGGGGGAAATGTAGCATATGACATTGGTTATGGAGTTGGACAAGTAAGTTATATTGCAGTTGAGATTTTAAAACTTAGAAAAATAAGATAG	MMMDKFDSLTFDKLSEIVGGNVAYDIGYGVGQVSYIAVEILKLRKIR*	MMMDKFDSLTFDKLSEIVGG	NVAYDIGYGVGQVSYIAVEILKLRKIR*	20	28	0.344444	3036.71	9.73602	1.99935
NU10	846319	846459	141	GTAGTGACATTTATGTCACTATTTTTTTG	ATGATGGATAAATTTGATTCTTTAACCTTTGATAAGCTTTCTGAAATTGTTGGGGGAAATGTAGCATATGACATTGGTTATGGAGTTGGACAAGTAAGTTATATTGCAGTTGAGATTTTAAAACTTAGAAAAATAAGATAG	MMDKFDSLTFDKLSEIVGGNVAYDIGYGVGQVSYIAVEILKLRKIR*	MMDKFDSLTFDKLSEIVGG	NVAYDIGYGVGQVSYIAVEILKLRKIR*	19	28	0.344444	3036.71	9.73602	1.99935
NU10	846322	846459	138	GTAGTGACATTTATGTCACTATTTTTTTG	ATGGATAAATTTGATTCTTTAACCTTTGATAAGCTTTCTGAAATTGTTGGGGGAAATGTAGCATATGACATTGGTTATGGAGTTGGACAAGTAAGTTATATTGCAGTTGAGATTTTAAAACTTAGAAAAATAAGATAG	MDKFDSLTFDKLSEIVGGNVAYDIGYGVGQVSYIAVEILKLRKIR*	MDKFDSLTFDKLSEIVGG	NVAYDIGYGVGQVSYIAVEILKLRKIR*	18	28	0.344444	3036.71	9.73602	1.99935
NU10	846301	846459	159	ATAGTGACATTTATGTCACTATTTTTTAT	ATGTATATGGATACAATGATGATGGATAAATTTGATTCTTTAACCTTTGATAAGCTTTCTGAAATTGTTGGGGGAAATGTAGCATATGACATTGGTTATGGAGTTGGACAAGTAAGTTATATTGCAGTTGAGATTTTAAAACTTAGAAAAATAAGATAG	MYMDTMMMDKFDSLTFDKLSEIVGGNVAYDIGYGVGQVSYIAVEILKLRKIR*	MYMDTMMMDKFDSLTFDKLSEIVGG	NVAYDIGYGVGQVSYIAVEILKLRKIR*	25	28	0.344444	3036.71	9.73602	1.99935
NU10	846307	846459	153	ATAGTGACATTTATGTCACTATTTTTTAT	ATGGATACAATGATGATGGATAAATTTGATTCTTTAACCTTTGATAAGCTTTCTGAAATTGTTGGGGGAAATGTAGCATATGACATTGGTTATGGAGTTGGACAAGTAAGTTATATTGCAGTTGAGATTTTAAAACTTAGAAAAATAAGATAG	MDTMMMDKFDSLTFDKLSEIVGGNVAYDIGYGVGQVSYIAVEILKLRKIR*	MDTMMMDKFDSLTFDKLSEIVGG	NVAYDIGYGVGQVSYIAVEILKLRKIR*	23	28	0.344444	3036.71	9.73602	1.99935
NU10	846145	846294	150	ATAGTGACATTTATGTCACTATTTTTTAT	ATGAAAAATACATTTCAAAAAATTGATATTAAAGATTTAGCAATTGTAGTTGGTGGAAGTATTTACTCATCTGTAGGATATGGAGTCGGAGTAGTTACTCACACGGTTTATGATTTTGGTCGTGGATTTGTAGATGGATTTAGAGGTTAA	MKNTFQKIDIKDLAIVVGGSIYSSVGYGVGVVTHTVYDFGRGFVDGFRG*	MKNTFQKIDIKDLAIVVGG	SIYSSVGYGVGVVTHTVYDFGRGFVDGFRG*	19	31	0.28	3197.56	7.52846	0.239453
NU10	846316	846459	144	ATAGTGACATTTATGTCACTATTTTTTAT	ATGATGATGGATAAATTTGATTCTTTAACCTTTGATAAGCTTTCTGAAATTGTTGGGGGAAATGTAGCATATGACATTGGTTATGGAGTTGGACAAGTAAGTTATATTGCAGTTGAGATTTTAAAACTTAGAAAAATAAGATAG	MMMDKFDSLTFDKLSEIVGGNVAYDIGYGVGQVSYIAVEILKLRKIR*	MMMDKFDSLTFDKLSEIVGG	NVAYDIGYGVGQVSYIAVEILKLRKIR*	20	28	0.344444	3036.71	9.73602	1.99935
NU10	846319	846459	141	ATAGTGACATTTATGTCACTATTTTTTAT	ATGATGGATAAATTTGATTCTTTAACCTTTGATAAGCTTTCTGAAATTGTTGGGGGAAATGTAGCATATGACATTGGTTATGGAGTTGGACAAGTAAGTTATATTGCAGTTGAGATTTTAAAACTTAGAAAAATAAGATAG	MMDKFDSLTFDKLSEIVGGNVAYDIGYGVGQVSYIAVEILKLRKIR*	MMDKFDSLTFDKLSEIVGG	NVAYDIGYGVGQVSYIAVEILKLRKIR*	19	28	0.344444	3036.71	9.73602	1.99935
NU10	846322	846459	138	ATAGTGACATTTATGTCACTATTTTTTAT	ATGGATAAATTTGATTCTTTAACCTTTGATAAGCTTTCTGAAATTGTTGGGGGAAATGTAGCATATGACATTGGTTATGGAGTTGGACAAGTAAGTTATATTGCAGTTGAGATTTTAAAACTTAGAAAAATAAGATAG	MDKFDSLTFDKLSEIVGGNVAYDIGYGVGQVSYIAVEILKLRKIR*	MDKFDSLTFDKLSEIVGG	NVAYDIGYGVGQVSYIAVEILKLRKIR*	18	28	0.344444	3036.71	9.73602	1.99935
NU10	910870	911106	237	GTGGTGACATTAATGTCACTACTTTTTTA	ATGACAACAAAAATCATTAACAATTTTAACTCACTTAATTCCGAAGATCTTTCTATTATTGCAGGTGGGGATGTGATTGGTTGTGTAGCTGGGACCGCTGGATCTGCTGGACTTGGATTTTTGACTGGAACATCAGTTGGAACTGTTGCATTTCCAATTGTTGGGACTGTTTCAGGTGGAGCATTTGGGGCATGGTCAGGAGCCGGCCTTGGAATGGCTACATTTTGCGGAGTTTAG	MTTKIINNFNSLNSEDLSIIAGGDVIGCVAGTAGSAGLGFLTGTSVGTVAFPIVGTVSGGAFGAWSGAGLGMATFCGV*	MTTKIINNFNSLNSEDLSIIAGG	DVIGCVAGTAGSAGLGFLTGTSVGTVAFPIVGTVSGGAFGAWSGAGLGMATFCGV*	23	56	1.14364	4978.43	3.74997	-1.06051
NU10	919496	919675	180	GTGGTGACATACATGTCACTACTTTTTTG	ATGACAACACAAACAATGAACAATTTTGAAACACTCGATCTCGAGGCACTTGCAAACGTTGAAGGTGGTGGATGGGTTAAGTGTTATGCCGGCACAATCGGATCTGCTCTAGTAGGATCAGCAGGAGGCCCAGTAGGTTACTGGGGAGGAGCTTTAGTTGGTTATGCCACATTCTGCTAA	MTTQTMNNFETLDLEALANVEGGGWVKCYAGTIGSALVGSAGGPVGYWGGALVGYATFC*	MTTQTMNNFETLDLEALANVEGG	GWVKCYAGTIGSALVGSAGGPVGYWGGALVGYATFC*	23	37	0.763889	3494.68	8.2049	0.936154
NU10	919511	919675	165	GTGGTGACATACATGTCACTACTTTTTTG	ATGAACAATTTTGAAACACTCGATCTCGAGGCACTTGCAAACGTTGAAGGTGGTGGATGGGTTAAGTGTTATGCCGGCACAATCGGATCTGCTCTAGTAGGATCAGCAGGAGGCCCAGTAGGTTACTGGGGAGGAGCTTTAGTTGGTTATGCCACATTCTGCTAA	MNNFETLDLEALANVEGGGWVKCYAGTIGSALVGSAGGPVGYWGGALVGYATFC*	MNNFETLDLEALANVEGG	GWVKCYAGTIGSALVGSAGGPVGYWGGALVGYATFC*	18	37	0.763889	3494.68	8.2049	0.936154
NU10	1681059	1681226	168	ATGGTGACATTTATGTCACTACTTTTTTA	ATGACTAAGACCATTAACAATCGTAAAAACATGACTACTCAAGAACTTGAAGCTGTATCAGGTGGAGTGGTTCCTTGGGCCGCTATTTCTGTTGGCATTGCTGCTGCAAAACTGACTTATGACCTTAGCTATGCTGCAGGTAAGTCTTTCTATAACCTCACCCACTAA	MTKTINNRKNMTTQELEAVSGGVVPWAAISVGIAAAKLTYDLSYAAGKSFYNLTH*	MTKTINNRKNMTTQELEAVSGG	VVPWAAISVGIAAAKLTYDLSYAAGKSFYNLTH*	22	34	0.587879	3496.84	9.03496	1.23835
NU10	1680875	1681039	165	ATGGTGACATTTATGTCACTACTTTTTTA	ATGACAATGATTAATAAAGAAATGAAGGCAGCTGACCTAGCCTCAGTAACAGGAGGCGGATGGAAGACTAACCTTGCCATTGGAGGGCTCTGCCTAGCTTCAGGACCTATTGGAACTATGATGTGCCTTGGAGCCTACAATGGCTACATGGACTCTGCGCGATAA	MTMINKEMKAADLASVTGGGWKTNLAIGGLCLASGPIGTMMCLGAYNGYMDSAR*	MTMINKEMKAADLASVTGG	GWKTNLAIGGLCLASGPIGTMMCLGAYNGYMDSAR*	19	36	0.351429	3591.68	8.21289	0.937738
NU10	1680881	1681039	159	ATGGTGACATTTATGTCACTACTTTTTTA	ATGATTAATAAAGAAATGAAGGCAGCTGACCTAGCCTCAGTAACAGGAGGCGGATGGAAGACTAACCTTGCCATTGGAGGGCTCTGCCTAGCTTCAGGACCTATTGGAACTATGATGTGCCTTGGAGCCTACAATGGCTACATGGACTCTGCGCGATAA	MINKEMKAADLASVTGGGWKTNLAIGGLCLASGPIGTMMCLGAYNGYMDSAR*	MINKEMKAADLASVTGG	GWKTNLAIGGLCLASGPIGTMMCLGAYNGYMDSAR*	17	36	0.351429	3591.68	8.21289	0.937738
PS4	1025039	1025206	168	ATAGTGACATCTATGTCACTACTTTTTTA	ATGATTAATAAACTCAAAACACATCAAAACATGACTCTTAAAGAGCTTGAAAGTGTATCAGGTGGGGCGGTTCCTTGGGCTGCTATCTCCGTCGGGATTGCTGCTGCAAAGCTGACTTACGACCTAAGCTATGCCGTTGGTAAAACTTATTACAACCTCACACACTAA	MINKLKTHQNMTLKELESVSGGAVPWAAISVGIAAAKLTYDLSYAVGKTYYNLTH*	MINKLKTHQNMTLKELESVSGG	AVPWAAISVGIAAAKLTYDLSYAVGKTYYNLTH*	22	34	0.466667	3526.85	8.96754	1.23756
PS4	1024854	1025018	165	ATAGTGACATCTATGTCACTACTTTTTTA	ATGACAAAGATAACTAAAGAAATGAATGTTGCAGACCTAGCTGCAGTCACAGGAGGCGGATGGAAGACCAACATCGCTATTGGAGGACTCTGCCTAGCTTCAGGACCTATCGGAACTCTTGTATGTGTTGGCGCTTATAATGGCTACAAGGATTCTGCACGATAA	MTKITKEMNVADLAAVTGGGWKTNIAIGGLCLASGPIGTLVCVGAYNGYKDSAR*	MTKITKEMNVADLAAVTGG	GWKTNIAIGGLCLASGPIGTLVCVGAYNGYKDSAR*	19	36	0.337143	3524.79	8.76681	1.93758
PS4	1521471	1521701	231	GTAGTGACATTGATGTCACTATTTTTTTG	ATGACAATACAAACTATTGATAAGATTGACATGCTTGATTTCAAAGATCTTTCTACCATTGTGGGTGGAGCATGTAGTTTTTGGGAAGCTACAGCTGCCGTTGGTGTCGGGGCTGTTGGGGGAGCCGTTAAAGGTGGTATTCAAACAGGTACTTGGCAAGGTGCAGCCTTAAAGGGTATTGGTTATGGTATTAATGGTGGGATTACTTATGGCTTTACTTGTCGTTATTAG	MTIQTIDKIDMLDFKDLSTIVGGACSFWEATAAVGVGAVGGAVKGGIQTGTWQGAALKGIGYGINGGITYGFTCRY*	MTIQTIDKIDMLDFKDLSTIVGG	ACSFWEATAAVGVGAVGGAVKGGIQTGTWQGAALKGIGYGINGGITYGFTCRY*	23	54	0.409434	5211.57	8.74396	1.93725
PS4	1530586	1530828	243	GTAGTGACATTTATGTCACTACTTTTTTG	ATGGCAACTCAAACAATTGAAAACTTTAACACCCTTGACCTCGAAACACTTGCTAGTGTTGAAGGAGGTGGCTGTAGTTGGAGAGGCGCAGGTGGAGCGACTGTTCAAGGAGCTATCGGAGGAGCGTTTGGAGGTAATGTAGTTTTACCAGTTGTAGGCTCAGTTCCTGGTTATCTAGCTGGTGGTGTTCTAGGTGGTGCAGGTGGTGCTGTTGCCTATGGAGCAACCTGCTGGTGGAGCTAA	MATQTIENFNTLDLETLASVEGGGCSWRGAGGATVQGAIGGAFGGNVVLPVVGSVPGYLAGGVLGGAGGAVAYGATCWWS*	MATQTIENFNTLDLETLASVEGG	GCSWRGAGGATVQGAIGGAFGGNVVLPVVGSVPGYLAGGVLGGAGGAVAYGATCWWS*	23	58	0.745614	5221.57	8.21452	0.937103
PS4	1531030	1531218	189	GTAGTGACATTTATGTCACTACTTTTTTG	ATGATTACAGAACTAACATATAACGACCTTGAAACCATCCAAGGTGGAGTATCTTGTATTATGCCTAGAACAAATAATAAAGCTGGTGGTAGCTACGACCCCTTTATAGACGGTAGGGTATCGCCACCTAGATATCGAAGTGGCGAAGCCTATCCGATGGTATATCTTCCTATCTGTGTTCTTATGTAG	MITELTYNDLETIQGGVSCIMPRTNNKAGGSYDPFIDGRVSPPRYRSGEAYPMVYLPICVLM*	MITELTYNDLETIQGG	VSCIMPRTNNKAGGSYDPFIDGRVSPPRYRSGEAYPMVYLPICVLM*	16	47	-0.102174	5119.5	8.72713	1.93819
PS4	1530066	1530245	180	GTAGTGACATTTATGTCACTACTTTTTTG	ATGACAACACAAACAATGAACAATTTTGAAACACTCGATCTCGAGGCACTTGCAAACGTTGAAGGTGGCGGATGGGTTAAGTGTTATGCCGGCACAATTGGATCTGCTCTAGTAGGATCGGCAGGAGGCCCAGTAGGTTACTGGGGAGGAGCTTTAGTTGGTTATGCCACATTCTGCTAA	MTTQTMNNFETLDLEALANVEGGGWVKCYAGTIGSALVGSAGGPVGYWGGALVGYATFC*	MTTQTMNNFETLDLEALANVEGG	GWVKCYAGTIGSALVGSAGGPVGYWGGALVGYATFC*	23	37	0.763889	3494.68	8.2049	0.936154
PS4	1530081	1530245	165	GTAGTGACATTTATGTCACTACTTTTTTG	ATGAACAATTTTGAAACACTCGATCTCGAGGCACTTGCAAACGTTGAAGGTGGCGGATGGGTTAAGTGTTATGCCGGCACAATTGGATCTGCTCTAGTAGGATCGGCAGGAGGCCCAGTAGGTTACTGGGGAGGAGCTTTAGTTGGTTATGCCACATTCTGCTAA	MNNFETLDLEALANVEGGGWVKCYAGTIGSALVGSAGGPVGYWGGALVGYATFC*	MNNFETLDLEALANVEGG	GWVKCYAGTIGSALVGSAGGPVGYWGGALVGYATFC*	18	37	0.763889	3494.68	8.2049	0.936154
Ssal B50	2110593	2110760	168	ATGGTGACATTTTTGTCACTACTTTTTTA	ATGACTAAGACCATTAACAATCGTAAAAACATGACTACTCAAGAACTTGAAGCTGTATCAGGTGGAGTAGTTCCTTGGGCCGCTATTTCTGTTGGCATCGCTGCTGCAAAACTGACTTATGACCTTAGCTATGCTGCAGGTAAGTCTTTCTATAACCTCACCCACTAA	MTKTINNRKNMTTQELEAVSGGVVPWAAISVGIAAAKLTYDLSYAAGKSFYNLTH*	MTKTINNRKNMTTQELEAVSGG	VVPWAAISVGIAAAKLTYDLSYAAGKSFYNLTH*	22	34	0.587879	3496.84	9.03496	1.23835
Ssal B50	2110409	2110573	165	ATGGTGACATTTTTGTCACTACTTTTTTA	ATGACAATGATTAACAAAGAAATGAAGGTAGCTGAGCTAGCCTCAGTAACAGGAGGCGGATGGAAGACCAACCTTGCCATTGGAGGGCTCTGCCTAGCTTCAGGACCTATTGGAACTATGGTATGCCTTGGAGCCTACAATGGCTACATGGACTCTGCGCGATAA	MTMINKEMKVAELASVTGGGWKTNLAIGGLCLASGPIGTMVCLGAYNGYMDSAR*	MTMINKEMKVAELASVTGG	GWKTNLAIGGLCLASGPIGTMVCLGAYNGYMDSAR*	19	36	0.417143	3559.71	8.21289	0.937738
Ssal B50	2110415	2110573	159	ATGGTGACATTTTTGTCACTACTTTTTTA	ATGATTAACAAAGAAATGAAGGTAGCTGAGCTAGCCTCAGTAACAGGAGGCGGATGGAAGACCAACCTTGCCATTGGAGGGCTCTGCCTAGCTTCAGGACCTATTGGAACTATGGTATGCCTTGGAGCCTACAATGGCTACATGGACTCTGCGCGATAA	MINKEMKVAELASVTGGGWKTNLAIGGLCLASGPIGTMVCLGAYNGYMDSAR*	MINKEMKVAELASVTGG	GWKTNLAIGGLCLASGPIGTMVCLGAYNGYMDSAR*	17	36	0.417143	3559.71	8.21289	0.937738
Ssal B50	269547	269696	150	ATAGTGACATTTATGTCACTATTTTTTTG	ATGCGAACTAAGGCATATGGCGAAGAGCTGACTGCTGAAACCTTAGAAAATGTCACAGGGGGTGATTTTGTATCTAGACCTCAAACCTTACCTGAACGATTGGGTTGGAACAAATGGTGGTTGAAAAGAAGACCTCCTTATGGCGATTAG	MRTKAYGEELTAETLENVTGGDFVSRPQTLPERLGWNKWWLKRRPPYGD*	MRTKAYGEELTAETLENVTGG	DFVSRPQTLPERLGWNKWWLKRRPPYGD*	21	29	-1.34286	3496.83	10.8569	3.00172
Ssal B50	339736	339969	234	GTGGTGACATACATGTCACTACTTTTTTG	ATGACAACACAAACAATGAACAATTTTGAAACACTCGATCTCGAGGCACTTGCAAACGTTGAAGGTGGAAATAGATGTAAAGATTTAATCTTTGGAGGAGCTTTAACTGGCGCAGGTGCTGGATTTACAGGTGGTATGGCAGCATTTGGTGTTACAGCATTTCCAGGAGCATTTGTAGGAGCACATGTTGGAGCAGTTGCTGGTGGGCTAGCATGTATCGGAGCGAGCTTTTAG	MTTQTMNNFETLDLEALANVEGGNRCKDLIFGGALTGAGAGFTGGMAAFGVTAFPGAFVGAHVGAVAGGLACIGASF*	MTTQTMNNFETLDLEALANVEGG	NRCKDLIFGGALTGAGAGFTGGMAAFGVTAFPGAFVGAHVGAVAGGLACIGASF*	23	55	0.996296	4987.47	8.24126	1.17958
Ssal B50	339751	339969	219	GTGGTGACATACATGTCACTACTTTTTTG	ATGAACAATTTTGAAACACTCGATCTCGAGGCACTTGCAAACGTTGAAGGTGGAAATAGATGTAAAGATTTAATCTTTGGAGGAGCTTTAACTGGCGCAGGTGCTGGATTTACAGGTGGTATGGCAGCATTTGGTGTTACAGCATTTCCAGGAGCATTTGTAGGAGCACATGTTGGAGCAGTTGCTGGTGGGCTAGCATGTATCGGAGCGAGCTTTTAG	MNNFETLDLEALANVEGGNRCKDLIFGGALTGAGAGFTGGMAAFGVTAFPGAFVGAHVGAVAGGLACIGASF*	MNNFETLDLEALANVEGG	NRCKDLIFGGALTGAGAGFTGGMAAFGVTAFPGAFVGAHVGAVAGGLACIGASF*	18	55	0.996296	4987.47	8.24126	1.17958
Ssal B50	339982	340170	189	GTGGTGACATACATGTCACTACTTTTTTG	ATGAATGTGACTAAGTATAATAAGATGTGCGATGCTGAGCTAGAAATTATTTCTGGTGGTGGGAAAGTTGGAGCAGTAATTGGTGGCTGTCTAGGTGGTATGCTCATGGCATGGGCAGCAGGACCTGTTTCCGCAGGGGGTTATACTATGATATGTGCTACTTCGGGGCTTGCAAATGCTTATTTTTGA	MNVTKYNKMCDAELEIISGGGKVGAVIGGCLGGMLMAWAAGPVSAGGYTMICATSGLANAYF*	MNVTKYNKMCDAELEIISGG	GKVGAVIGGCLGGMLMAWAAGPVSAGGYTMICATSGLANAYF*	20	43	0.985714	3992.91	8.21291	0.936947
Ssal B50	339988	340170	183	GTGGTGACATACATGTCACTACTTTTTTG	GTGACTAAGTATAATAAGATGTGCGATGCTGAGCTAGAAATTATTTCTGGTGGTGGGAAAGTTGGAGCAGTAATTGGTGGCTGTCTAGGTGGTATGCTCATGGCATGGGCAGCAGGACCTGTTTCCGCAGGGGGTTATACTATGATATGTGCTACTTCGGGGCTTGCAAATGCTTATTTTTGA	VTKYNKMCDAELEIISGGGKVGAVIGGCLGGMLMAWAAGPVSAGGYTMICATSGLANAYF*	VTKYNKMCDAELEIISGG	GKVGAVIGGCLGGMLMAWAAGPVSAGGYTMICATSGLANAYF*	18	43	0.985714	3992.91	8.21291	0.936947
Ssal B57	2075541	2075708	168	ATGGTGACATTTATGTCACTACTTTTTTA	ATGACTAAGACCATTAACAATCGTAAAAACATGACTACTCAAGAACTTGAAACTGTATCAGGTGGAGTGGTTCCTTGGGCCGCTATTTCTGTTGGCATTGCTGCTGCAAAACTGACTTATGACCTTAGCTATGCTGCAGGTAAGTCTTTCTATAACCTCACCCACTAA	MTKTINNRKNMTTQELETVSGGVVPWAAISVGIAAAKLTYDLSYAAGKSFYNLTH*	MTKTINNRKNMTTQELETVSGG	VVPWAAISVGIAAAKLTYDLSYAAGKSFYNLTH*	22	34	0.587879	3496.84	9.03496	1.23835
Ssal B57	2075357	2075521	165	ATGGTGACATTTATGTCACTACTTTTTTA	ATGACAATGATTAACAAAGAAATGAAGGCAGCTGACCTAGCCTCAGTAACAGGAGGCGGATGGAAGACTAACCTTGCCATTGGAGGGCTCTGCCTAGCTTCAGGACCTATTGGAACTATGGTATGCCTTGGAGCCTACAATGGCTACATGGACTCTGCGAGATAA	MTMINKEMKAADLASVTGGGWKTNLAIGGLCLASGPIGTMVCLGAYNGYMDSAR*	MTMINKEMKAADLASVTGG	GWKTNLAIGGLCLASGPIGTMVCLGAYNGYMDSAR*	19	36	0.417143	3559.71	8.21289	0.937738
Ssal B57	2075363	2075521	159	ATGGTGACATTTATGTCACTACTTTTTTA	ATGATTAACAAAGAAATGAAGGCAGCTGACCTAGCCTCAGTAACAGGAGGCGGATGGAAGACTAACCTTGCCATTGGAGGGCTCTGCCTAGCTTCAGGACCTATTGGAACTATGGTATGCCTTGGAGCCTACAATGGCTACATGGACTCTGCGAGATAA	MINKEMKAADLASVTGGGWKTNLAIGGLCLASGPIGTMVCLGAYNGYMDSAR*	MINKEMKAADLASVTGG	GWKTNLAIGGLCLASGPIGTMVCLGAYNGYMDSAR*	17	36	0.417143	3559.71	8.21289	0.937738
Ssal B57	290648	290797	150	ATAGTGACATTTATGTCACTATTTTTTTG	ATGCGAACTAAGGTATATGGCGAAGAGCTCACTGCTGAAACGTTAGAAAATGTCACAGGGGGTGATTTTGTATCTAGACCTCAAACCTTACCTGAACGATTGGGTTGGAACAAATGGTGGTTGAAAAGAAAATACCCTTATGGTGATTAA	MRTKVYGEELTAETLENVTGGDFVSRPQTLPERLGWNKWWLKRKYPYGD*	MRTKVYGEELTAETLENVTGG	DFVSRPQTLPERLGWNKWWLKRKYPYGD*	21	29	-1.31071	3534.83	10.3219	3.00077
Ssal B57	358825	359055	231	GTAGTGACATTTATGTCACTACTTTTTTG	ATGACAACACAAATCATTAACAATTTTAACTCACTTAATTCCGAAGATCTTTCTACTGTTAAGGGTGGAGCATGTAGTTTTTGGGGAGCTACAGCTGCCGTAGGCGTCGGGGCTGTTGGAGGAGCCATTAAAGGTGGTATTCAAACAGGTACTTGGCAAGGTGCAGCCTTAAAGGGTATTGGTTATGGTATTAAAGATGGGATTACTTATGGCCTTATTTGTCGTTATTAG	MTTQIINNFNSLNSEDLSTVKGGACSFWGATAAVGVGAVGGAIKGGIQTGTWQGAALKGIGYGIKDGITYGLICRY*	MTTQIINNFNSLNSEDLSTVKGG	ACSFWGATAAVGVGAVGGAIKGGIQTGTWQGAALKGIGYGIKDGITYGLICRY*	23	54	0.524528	5203.67	9.26645	2.93663
Ssal B57	367429	367608	180	GTGGTGACATTTATGTCACTACTTTTTTG	ATGACAACACAAACAATGAACACTTTTGAAACACTCGATCTCGAGACACTTGCAAACGTTGAAGGTGGCGGATGGGTTAAGTGTTATGCCGGCACAATTGGCTCTGCTCTAGTAGGATCAGCAGGAGGCCCGGTAGGTTACTGGGGAGGAGCTTTAGTTGGCTATGCTACATTCTGCTAA	MTTQTMNTFETLDLETLANVEGGGWVKCYAGTIGSALVGSAGGPVGYWGGALVGYATFC*	MTTQTMNTFETLDLETLANVEGG	GWVKCYAGTIGSALVGSAGGPVGYWGGALVGYATFC*	23	37	0.763889	3494.68	8.2049	0.936154
Ssal B57	367444	367608	165	GTGGTGACATTTATGTCACTACTTTTTTG	ATGAACACTTTTGAAACACTCGATCTCGAGACACTTGCAAACGTTGAAGGTGGCGGATGGGTTAAGTGTTATGCCGGCACAATTGGCTCTGCTCTAGTAGGATCAGCAGGAGGCCCGGTAGGTTACTGGGGAGGAGCTTTAGTTGGCTATGCTACATTCTGCTAA	MNTFETLDLETLANVEGGGWVKCYAGTIGSALVGSAGGPVGYWGGALVGYATFC*	MNTFETLDLETLANVEGG	GWVKCYAGTIGSALVGSAGGPVGYWGGALVGYATFC*	18	37	0.763889	3494.68	8.2049	0.936154
Ssal B63	2097124	2097291	168	ATGGTGACATTTATGTCACTACTTTTTTA	ATGACTAAGACCATTAACAATCGTAAAAACATGACTACTCAAGAACTTGAAACTGTATCAGGTGGAGTGGTTCCTTGGGCCGCTATTTCTGTTGGCATTGCTGCTGCAAAACTGACTTATGACCTTAGCTATGCTGCAGGTAAGTCTTTCTATAACCTCACCCACTAA	MTKTINNRKNMTTQELETVSGGVVPWAAISVGIAAAKLTYDLSYAAGKSFYNLTH*	MTKTINNRKNMTTQELETVSGG	VVPWAAISVGIAAAKLTYDLSYAAGKSFYNLTH*	22	34	0.587879	3496.84	9.03496	1.23835
Ssal B63	2096940	2097104	165	ATGGTGACATTTATGTCACTACTTTTTTA	ATGACAATGATTAACAAAGAAATGAAGGCAGCTGACCTAGCCTCAGTAACAGGAGGCGGATGGAAGACTAACCTTGCCATTGGAGGGCTCTGCCTAGCTTCAGGACCTATTGGAACTATGGTATGCCTTGGAGCCTACAATGGCTACATGGACTCTGCGAGATAA	MTMINKEMKAADLASVTGGGWKTNLAIGGLCLASGPIGTMVCLGAYNGYMDSAR*	MTMINKEMKAADLASVTGG	GWKTNLAIGGLCLASGPIGTMVCLGAYNGYMDSAR*	19	36	0.417143	3559.71	8.21289	0.937738
Ssal B63	2096946	2097104	159	ATGGTGACATTTATGTCACTACTTTTTTA	ATGATTAACAAAGAAATGAAGGCAGCTGACCTAGCCTCAGTAACAGGAGGCGGATGGAAGACTAACCTTGCCATTGGAGGGCTCTGCCTAGCTTCAGGACCTATTGGAACTATGGTATGCCTTGGAGCCTACAATGGCTACATGGACTCTGCGAGATAA	MINKEMKAADLASVTGGGWKTNLAIGGLCLASGPIGTMVCLGAYNGYMDSAR*	MINKEMKAADLASVTGG	GWKTNLAIGGLCLASGPIGTMVCLGAYNGYMDSAR*	17	36	0.417143	3559.71	8.21289	0.937738
Ssal B63	264792	264941	150	ATAGTGACATTTATGTCACTATTTTTTTG	ATGCGAACTAAGGCATATGGTGAAGAGCTCACTACTGAAACGTTAGAAAATGTCACAGGGGGTGATTTTGTATCTAGACCTCAAACCTTACCTGAACGATTGGGTTGGAATAGATGGTGGTTGAAAAGAAAATACCCTTATGGTGATTAG	MRTKAYGEELTTETLENVTGGDFVSRPQTLPERLGWNRWWLKRKYPYGD*	MRTKAYGEELTTETLENVTGG	DFVSRPQTLPERLGWNRWWLKRKYPYGD*	21	29	-1.33214	3562.84	10.4397	3.00093
Ssal B63	330982	331212	231	GTAGTGACATTTATGTCACTACTTTTTTG	ATGACGACACAAATCATTAACAATTTTAACTCACTTAATTCCGAAGATCTTTCTACTGTTAAGGGTGGAGCATGTAGTTTTTGGGGAGCTACAGCTGCCGTAGGCGTCGGGGCTGTTGGAGGAGCCATTAAAGGTGGTATTCAAACAGGTACTTGGCAAGGTGCAGCCTTAAAGGGTATTGGTTATGGTATTAAAGATGGGATTACTTATGGACTTATTTGTCGTTATTAG	MTTQIINNFNSLNSEDLSTVKGGACSFWGATAAVGVGAVGGAIKGGIQTGTWQGAALKGIGYGIKDGITYGLICRY*	MTTQIINNFNSLNSEDLSTVKGG	ACSFWGATAAVGVGAVGGAIKGGIQTGTWQGAALKGIGYGIKDGITYGLICRY*	23	54	0.524528	5203.67	9.26645	2.93663
Ssal B63	339595	339825	231	GTGGTGACATTTATGTCACTACTTTTTTG	ATGACAACACAAACAATGAACACTTTTGAAACACTCGATCTCGAGACACTTGCAAACGTTGAAGGTGGTGGATGTAGCTGGGGAGGTTTTGCTAAACAAGGAGTAGCTACAGGAGTTGGTAATGGTTTACGATTAGGTATCAAAACACGTACTTGGCAAGGTGCTGTCGCAGGAGCAGCTGGAGGTGCTATTGTAGGGGGTGTTGGTTATGGAGCAACATGCTGGTGGTGA	MTTQTMNTFETLDLETLANVEGGGCSWGGFAKQGVATGVGNGLRLGIKTRTWQGAVAGAAGGAIVGGVGYGATCWW*	MTTQTMNTFETLDLETLANVEGG	GCSWGGFAKQGVATGVGNGLRLGIKTRTWQGAVAGAAGGAIVGGVGYGATCWW*	23	54	0.332075	5136.57	10.2636	3.93758
Ssal B63	339610	339825	216	GTGGTGACATTTATGTCACTACTTTTTTG	ATGAACACTTTTGAAACACTCGATCTCGAGACACTTGCAAACGTTGAAGGTGGTGGATGTAGCTGGGGAGGTTTTGCTAAACAAGGAGTAGCTACAGGAGTTGGTAATGGTTTACGATTAGGTATCAAAACACGTACTTGGCAAGGTGCTGTCGCAGGAGCAGCTGGAGGTGCTATTGTAGGGGGTGTTGGTTATGGAGCAACATGCTGGTGGTGA	MNTFETLDLETLANVEGGGCSWGGFAKQGVATGVGNGLRLGIKTRTWQGAVAGAAGGAIVGGVGYGATCWW*	MNTFETLDLETLANVEGG	GCSWGGFAKQGVATGVGNGLRLGIKTRTWQGAVAGAAGGAIVGGVGYGATCWW*	18	54	0.332075	5136.57	10.2636	3.93758
Ssal L22	2080294	2080461	168	ATGGTGACATTTTTGTCACTACTTTTTTA	ATGACTAAGACCATTAACAATCGTAAAAACATGACTACTCAAGAACTTGAAGCTGTATCAGGTGGAGTAGTTCCTTGGGCCGCTATTTCTGTTGGCATCGCTGCTGCAAAACTGACTTATGACCTTAGCTATGCTGCAGGTAAGTCTTTCTATAACCTCACCCACTAA	MTKTINNRKNMTTQELEAVSGGVVPWAAISVGIAAAKLTYDLSYAAGKSFYNLTH*	MTKTINNRKNMTTQELEAVSGG	VVPWAAISVGIAAAKLTYDLSYAAGKSFYNLTH*	22	34	0.587879	3496.84	9.03496	1.23835
Ssal L22	2080110	2080274	165	ATGGTGACATTTTTGTCACTACTTTTTTA	ATGACAATGATTAACAAAGAAATGAAGGTAGCTGAGCTAGCCTCAGTAACAGGAGGCGGATGGAAGACCAACCTTGCCATTGGAGGGCTCTGCCTAGCTTCAGGACCTATTGGAACTATGGTATGCCTTGGAGCCTACAATGGCTACATGGACTCTGCGCGATAA	MTMINKEMKVAELASVTGGGWKTNLAIGGLCLASGPIGTMVCLGAYNGYMDSAR*	MTMINKEMKVAELASVTGG	GWKTNLAIGGLCLASGPIGTMVCLGAYNGYMDSAR*	19	36	0.417143	3559.71	8.21289	0.937738
Ssal L22	2080116	2080274	159	ATGGTGACATTTTTGTCACTACTTTTTTA	ATGATTAACAAAGAAATGAAGGTAGCTGAGCTAGCCTCAGTAACAGGAGGCGGATGGAAGACCAACCTTGCCATTGGAGGGCTCTGCCTAGCTTCAGGACCTATTGGAACTATGGTATGCCTTGGAGCCTACAATGGCTACATGGACTCTGCGCGATAA	MINKEMKVAELASVTGGGWKTNLAIGGLCLASGPIGTMVCLGAYNGYMDSAR*	MINKEMKVAELASVTGG	GWKTNLAIGGLCLASGPIGTMVCLGAYNGYMDSAR*	17	36	0.417143	3559.71	8.21289	0.937738
Ssal L22	277052	277201	150	ATAGTGACATTTATGTCACTATTTTTTTG	ATGCGAACTAAGGTATATGGCGAAGAGCTAACTGCTGAAACGTTAGAAAATGTCACAGGGGGTGATTTTGTATCTAGACCTCAAACCTTACCTGAACGATTGGGTTGGAACAGATGGTGGTTGAAAAGAAAATACCCTTATGGTGATTAG	MRTKVYGEELTAETLENVTGGDFVSRPQTLPERLGWNRWWLKRKYPYGD*	MRTKVYGEELTAETLENVTGG	DFVSRPQTLPERLGWNRWWLKRKYPYGD*	21	29	-1.33214	3562.84	10.4397	3.00093
Ssal L22	341632	341862	231	GTGGTGACATTAATGTCACTACTTTTTTG	ATGACAACACAAATCATTAACAATTTTAATTCACTTAATTCCGAAGATCTTTCTACTGTTAAGGGGGGAGCATGTAGTTTTTGGGGAGCTACAGCTGCCGTAGGTGTCGGGGCTGTTGGAGGAGCCGTTAAAGGTGGTATTCAAACAGGTACTTGGCAAGGTGCAGCCTTAAAGGGTATTGGTTATGGTATTAAAGGTGGGATTACTTATGGCCTTACTTGTCGTTATTAG	MTTQIINNFNSLNSEDLSTVKGGACSFWGATAAVGVGAVGGAVKGGIQTGTWQGAALKGIGYGIKGGITYGLTCRY*	MTTQIINNFNSLNSEDLSTVKGG	ACSFWGATAAVGVGAVGGAVKGGIQTGTWQGAALKGIGYGIKGGITYGLTCRY*	23	54	0.479245	5119.62	9.74961	3.93583
Ssal L22	350242	350472	231	GTGGTGACATTTATGTCACTACTTTTTTG	ATGACAACACAAACAATGAACACTTTTGAAACACTCGATCTCGAGACACTTGCAAACGTTGAAGGTGGCGGATGTAGCTGGGGAGGTTTTGCTAAACAAGGAGTAGCTACAGGAGTTGGTAATGGTTTACGATTAGGTATCAAAACACGTACTTGGCAAGGTGCTGTCGCAGGAGCAGCTGGAGGTGCTATCGTAGGGGGTGTTGGTTATGGAGCAACATGCTGGTGGTGA	MTTQTMNTFETLDLETLANVEGGGCSWGGFAKQGVATGVGNGLRLGIKTRTWQGAVAGAAGGAIVGGVGYGATCWW*	MTTQTMNTFETLDLETLANVEGG	GCSWGGFAKQGVATGVGNGLRLGIKTRTWQGAVAGAAGGAIVGGVGYGATCWW*	23	54	0.332075	5136.57	10.2636	3.93758
Ssal L22	350257	350472	216	GTGGTGACATTTATGTCACTACTTTTTTG	ATGAACACTTTTGAAACACTCGATCTCGAGACACTTGCAAACGTTGAAGGTGGCGGATGTAGCTGGGGAGGTTTTGCTAAACAAGGAGTAGCTACAGGAGTTGGTAATGGTTTACGATTAGGTATCAAAACACGTACTTGGCAAGGTGCTGTCGCAGGAGCAGCTGGAGGTGCTATCGTAGGGGGTGTTGGTTATGGAGCAACATGCTGGTGGTGA	MNTFETLDLETLANVEGGGCSWGGFAKQGVATGVGNGLRLGIKTRTWQGAVAGAAGGAIVGGVGYGATCWW*	MNTFETLDLETLANVEGG	GCSWGGFAKQGVATGVGNGLRLGIKTRTWQGAVAGAAGGAIVGGVGYGATCWW*	18	54	0.332075	5136.57	10.2636	3.93758
Ssal L22	354260	354418	159	GTAGTGACATTTATGTCACTACTTTTTTG	ATGGGAACTCAAACAATTGAAAACTTTAACACCCTCGACCTTGAAACACTTGCTAGTGTTGAAGGAGGACGAGTCAATTGGGAACGATGGGGAATGTGTGGGGCCTCTGTCGCCGTAGGTGCAACTATTGGAGGTGGAGTAGCCTTACTTGGCTGTTAA	MGTQTIENFNTLDLETLASVEGGRVNWERWGMCGASVAVGATIGGGVALLGC*	MGTQTIENFNTLDLETLASVEGG	RVNWERWGMCGASVAVGATIGGGVALLGC*	23	30	0.72069	2889.42	8.23143	0.939944
Ssal L25	1992013	1992180	168	ATGGTGACATTTTTGTCACTACTTTTTTA	ATGACTAAGACCATTAACAATCGTAAAAACATGACTACTCAAGAACTTGAAGCTGTATCAGGTGGAGTAGTTCCTTGGGCCGCTATTTCTGTTGGCATCGCTGCTGCAAAACTGACTTATGACCTTAGCTATGCTGCAGGTAAGTCTTTCTATAACCTCACCCACTAA	MTKTINNRKNMTTQELEAVSGGVVPWAAISVGIAAAKLTYDLSYAAGKSFYNLTH*	MTKTINNRKNMTTQELEAVSGG	VVPWAAISVGIAAAKLTYDLSYAAGKSFYNLTH*	22	34	0.587879	3496.84	9.03496	1.23835
Ssal L25	1991829	1991993	165	ATGGTGACATTTTTGTCACTACTTTTTTA	ATGACAATGATTAACAAAGAAATGAAGGTAGCTGAGCTAGCCTCAGTAACAGGAGGCGGATGGAAGACCAACCTTGCCATTGGAGGGCTCTGCCTAGCTTCAGGACCTATTGGAACTATGGTATGCCTTGGAGCCTACAATGGCTACATGGACTCTGCGCGATAA	MTMINKEMKVAELASVTGGGWKTNLAIGGLCLASGPIGTMVCLGAYNGYMDSAR*	MTMINKEMKVAELASVTGG	GWKTNLAIGGLCLASGPIGTMVCLGAYNGYMDSAR*	19	36	0.417143	3559.71	8.21289	0.937738
Ssal L25	1991835	1991993	159	ATGGTGACATTTTTGTCACTACTTTTTTA	ATGATTAACAAAGAAATGAAGGTAGCTGAGCTAGCCTCAGTAACAGGAGGCGGATGGAAGACCAACCTTGCCATTGGAGGGCTCTGCCTAGCTTCAGGACCTATTGGAACTATGGTATGCCTTGGAGCCTACAATGGCTACATGGACTCTGCGCGATAA	MINKEMKVAELASVTGGGWKTNLAIGGLCLASGPIGTMVCLGAYNGYMDSAR*	MINKEMKVAELASVTGG	GWKTNLAIGGLCLASGPIGTMVCLGAYNGYMDSAR*	17	36	0.417143	3559.71	8.21289	0.937738
Ssal L25	284939	285088	150	ATAGTGACATTTATGTCACTATTTTTTTG	ATGCGAACTAAGGTATATGGCGAAGAGCTAACTGCTGAAACGTTAGAAAATGTCACAGGGGGTGATTTTGTATCTAGACCTCAAACCTTACCTGAACGATTGGGTTGGAACAGATGGTGGTTGAAAAGAAAATACCCTTATGGTGATTAG	MRTKVYGEELTAETLENVTGGDFVSRPQTLPERLGWNRWWLKRKYPYGD*	MRTKVYGEELTAETLENVTGG	DFVSRPQTLPERLGWNRWWLKRKYPYGD*	21	29	-1.33214	3562.84	10.4397	3.00093
Ssal L25	346850	347080	231	GTAGTGACATTTATGTCACTACTTTTTTG	ATGACAACACAAATCATTAACAATTTTAACTCACTTAATTCCGAAGATCTTTCTACTGTTAAGGGTGGAGCATGTAGTTTTTGGGGAGCTACAGCTGCCGTAGGCGTCGGGGCTGTTGGAGGAGCCATTAAAGGTGGTATTCAAACAGGTACTTGGCAAGGTGCAGCCTTAAAGGGTATTGGTTATGGTATTAAAGATGGGATTACTTATGGCCTTATTTGTCGTTATTAG	MTTQIINNFNSLNSEDLSTVKGGACSFWGATAAVGVGAVGGAIKGGIQTGTWQGAALKGIGYGIKDGITYGLICRY*	MTTQIINNFNSLNSEDLSTVKGG	ACSFWGATAAVGVGAVGGAIKGGIQTGTWQGAALKGIGYGIKDGITYGLICRY*	23	54	0.524528	5203.67	9.26645	2.93663
Ssal L25	355463	355693	231	GTGGTGACATTTATGTCACTACTTTTTTG	ATGACAACACAAACAATGAACACTTTTGAAACACTCGATCTCGAGACACTTGCAAACGTTGAAGGTGGCGGATGTAGCTGGGGAGGTTTTGCTAAACAAGGAGTAGCTACAGGAGTTGGTAATGGTTTACGATTAGGTATCAAAACACGTACTTGGCAAGGTGCTGTCGCAGGAGCAGCTGGAGGTGCTATCGTAGGGGGTGTTGGTTATGGAGCAACATGCTGGTGGTGA	MTTQTMNTFETLDLETLANVEGGGCSWGGFAKQGVATGVGNGLRLGIKTRTWQGAVAGAAGGAIVGGVGYGATCWW*	MTTQTMNTFETLDLETLANVEGG	GCSWGGFAKQGVATGVGNGLRLGIKTRTWQGAVAGAAGGAIVGGVGYGATCWW*	23	54	0.332075	5136.57	10.2636	3.93758
Ssal L25	355478	355693	216	GTGGTGACATTTATGTCACTACTTTTTTG	ATGAACACTTTTGAAACACTCGATCTCGAGACACTTGCAAACGTTGAAGGTGGCGGATGTAGCTGGGGAGGTTTTGCTAAACAAGGAGTAGCTACAGGAGTTGGTAATGGTTTACGATTAGGTATCAAAACACGTACTTGGCAAGGTGCTGTCGCAGGAGCAGCTGGAGGTGCTATCGTAGGGGGTGTTGGTTATGGAGCAACATGCTGGTGGTGA	MNTFETLDLETLANVEGGGCSWGGFAKQGVATGVGNGLRLGIKTRTWQGAVAGAAGGAIVGGVGYGATCWW*	MNTFETLDLETLANVEGG	GCSWGGFAKQGVATGVGNGLRLGIKTRTWQGAVAGAAGGAIVGGVGYGATCWW*	18	54	0.332075	5136.57	10.2636	3.93758
Ssal L25	359481	359639	159	GTAGTGACATTTATGTCACTACTTTTTTG	ATGGGAACTCAAACAATTGAAAACTTTAACACCCTCGACCTTGAAACACTTGCTAGTGTTGAAGGAGGACGAGTCAATTGGGAACGATGGGGAATGTGTGGGGCCTCTGTCGCCGTAGGTGCAACTATTGGAGGTGGAGTAGCCTTACTTGGCTGTTAA	MGTQTIENFNTLDLETLASVEGGRVNWERWGMCGASVAVGATIGGGVALLGC*	MGTQTIENFNTLDLETLASVEGG	RVNWERWGMCGASVAVGATIGGGVALLGC*	23	30	0.72069	2889.42	8.23143	0.939944
Ssal L45	2018128	2018295	168	ATGGTGACATTTATGTCACTACTTTTTTA	ATGACTAAGACCATTAACAATCGTAAAAACATGACTACTCAAGAACTTGAAGCTGTATCAGGTGGAGTAGTTCCTTGGGCCGCTATTTCTGTTGGCATCGCTGCTGCAAAACTGACTTATGACCTTAGCTATGCTGCAGGTAAGTCTTTCTATAACCTCACCCACTAA	MTKTINNRKNMTTQELEAVSGGVVPWAAISVGIAAAKLTYDLSYAAGKSFYNLTH*	MTKTINNRKNMTTQELEAVSGG	VVPWAAISVGIAAAKLTYDLSYAAGKSFYNLTH*	22	34	0.587879	3496.84	9.03496	1.23835
Ssal L45	2017944	2018108	165	ATGGTGACATTTATGTCACTACTTTTTTA	ATGACAATGATTAACAAAGAAATGAAGGCAGCTGACCTAGCCTCAGTAACAGGAGGAGGATGGAAGACTAACCTTGCCATTGGAGGGCTCTGCCTAGCTTCAGGACCTATTGGAACGATGGTATGCCTTGGAGCCTACAATGGCTACATGGACTCTGCGCGATAA	MTMINKEMKAADLASVTGGGWKTNLAIGGLCLASGPIGTMVCLGAYNGYMDSAR*	MTMINKEMKAADLASVTGG	GWKTNLAIGGLCLASGPIGTMVCLGAYNGYMDSAR*	19	36	0.417143	3559.71	8.21289	0.937738
Ssal L45	2017950	2018108	159	ATGGTGACATTTATGTCACTACTTTTTTA	ATGATTAACAAAGAAATGAAGGCAGCTGACCTAGCCTCAGTAACAGGAGGAGGATGGAAGACTAACCTTGCCATTGGAGGGCTCTGCCTAGCTTCAGGACCTATTGGAACGATGGTATGCCTTGGAGCCTACAATGGCTACATGGACTCTGCGCGATAA	MINKEMKAADLASVTGGGWKTNLAIGGLCLASGPIGTMVCLGAYNGYMDSAR*	MINKEMKAADLASVTGG	GWKTNLAIGGLCLASGPIGTMVCLGAYNGYMDSAR*	17	36	0.417143	3559.71	8.21289	0.937738
Ssal L45	246786	246986	201	ATAGTGACATTTATGTCACTATTTTTTAT	TTGAAAACATCAGAAATGACACAACAAGTATTGACACATCAGGAATTATCAGTGGTTGTAGGTGGTGGATGTAGTTGGAACAATGCAGCTAAGGCAGCCCTCGGAACAAGTATCACGGGTCTTATCACTAGTGGCCCAGGAGGAGCTTTATTGGGATTAGCTGGAGGAGCAGTAAGTTACGGAGCGTTGTGTTGGGTATGA	LKTSEMTQQVLTHQELSVVVGGGCSWNNAAKAALGTSITGLITSGPGGALLGLAGGAVSYGALCWV*	LKTSEMTQQVLTHQELSVVVGG	GCSWNNAAKAALGTSITGLITSGPGGALLGLAGGAVSYGALCWV*	22	45	0.788636	4105.08	8.22118	0.937741
Ssal L45	246801	246986	186	ATAGTGACATTTATGTCACTATTTTTTAT	ATGACACAACAAGTATTGACACATCAGGAATTATCAGTGGTTGTAGGTGGTGGATGTAGTTGGAACAATGCAGCTAAGGCAGCCCTCGGAACAAGTATCACGGGTCTTATCACTAGTGGCCCAGGAGGAGCTTTATTGGGATTAGCTGGAGGAGCAGTAAGTTACGGAGCGTTGTGTTGGGTATGA	MTQQVLTHQELSVVVGGGCSWNNAAKAALGTSITGLITSGPGGALLGLAGGAVSYGALCWV*	MTQQVLTHQELSVVVGG	GCSWNNAAKAALGTSITGLITSGPGGALLGLAGGAVSYGALCWV*	17	45	0.788636	4105.08	8.22118	0.937741
Ssal L45	258152	258301	150	GTAGTGACATTTATGTCACTATTTTTTTA	ATGCGAACTAAGGTATATGGTGAAGAGCTCAATGCTGAAACCTTAGAAAATGTTACAGGGGGTGGTTTTGTATCTAAACCTCAAACCTTACCTGAACGATTGGGTTGGAACAAATGGTGGTTGAAAAGAAGACCTCCTTATGGCGATTAG	MRTKVYGEELNAETLENVTGGGFVSKPQTLPERLGWNKWWLKRRPPYGD*	MRTKVYGEELNAETLENVTGG	GFVSKPQTLPERLGWNKWWLKRRPPYGD*	21	29	-1.21071	3410.82	11.0904	4.00077
Ssal L45	323439	323669	231	GTAGTGACATTTATGTCACTACTTTTTTG	ATGACGACACAAATCATTAACAATTTTAACTCACTTAATTCCGAAGATCTTTCTACTGTTAAGGGTGGAGCATGTAGTTTTTGGGGAGCTACAGCTGCCGTAGGCGTCGGGGCTGTTGGAGGAGCCATTAAAGGTGGTATTCAAACAGGTACTTGGCAAGGTGCAGCCTTAAAGGGTATTGGTTATGGTATTAAAGATGGGATTACTTATGGACTTATTTGTCGTTATTAG	MTTQIINNFNSLNSEDLSTVKGGACSFWGATAAVGVGAVGGAIKGGIQTGTWQGAALKGIGYGIKDGITYGLICRY*	MTTQIINNFNSLNSEDLSTVKGG	ACSFWGATAAVGVGAVGGAIKGGIQTGTWQGAALKGIGYGIKDGITYGLICRY*	23	54	0.524528	5203.67	9.26645	2.93663
Ssal L45	332051	332281	231	GTGGTGACATTTATGTCACTACTTTTTTG	ATGACAACACAAACAATGAACAATTTTGAAACACTCGATCTCGAGACACTTGCAAACGCTGAAGGTGGCGGATGTAGCTGGGGAGGTTTTGCTAAACAAGGAGTAGCTACAGGAGTTGGTAATGGTTTACGATTAGGTATCAAAACACGTACTTGGCAAGGTGCTGTCGCAGGAGCAGCTGGAGGTGCTATCGTAGGGGGTGTTGGTTATGGAGCAACATGCTGGTGGTGA	MTTQTMNNFETLDLETLANAEGGGCSWGGFAKQGVATGVGNGLRLGIKTRTWQGAVAGAAGGAIVGGVGYGATCWW*	MTTQTMNNFETLDLETLANAEGG	GCSWGGFAKQGVATGVGNGLRLGIKTRTWQGAVAGAAGGAIVGGVGYGATCWW*	23	54	0.332075	5136.57	10.2636	3.93758
Ssal L45	332066	332281	216	GTGGTGACATTTATGTCACTACTTTTTTG	ATGAACAATTTTGAAACACTCGATCTCGAGACACTTGCAAACGCTGAAGGTGGCGGATGTAGCTGGGGAGGTTTTGCTAAACAAGGAGTAGCTACAGGAGTTGGTAATGGTTTACGATTAGGTATCAAAACACGTACTTGGCAAGGTGCTGTCGCAGGAGCAGCTGGAGGTGCTATCGTAGGGGGTGTTGGTTATGGAGCAACATGCTGGTGGTGA	MNNFETLDLETLANAEGGGCSWGGFAKQGVATGVGNGLRLGIKTRTWQGAVAGAAGGAIVGGVGYGATCWW*	MNNFETLDLETLANAEGG	GCSWGGFAKQGVATGVGNGLRLGIKTRTWQGAVAGAAGGAIVGGVGYGATCWW*	18	54	0.332075	5136.57	10.2636	3.93758
Ssal L45	336069	336227	159	GTAGTGACATTTATGTCACTACTTTTTTG	ATGGGAACTCAAACAATTGAAAACTTTAACACCCTCGACCTTGAAACACTTGCTAGTGTTGAAGGAGGACGAGTCAATTGGGAACGATGGGGAATGTGTGGGGCCTCTGTCGCCGTAGGTGCAACTATTGGAGGTGGAGTAGCCTTACTTGGCTGTTAA	MGTQTIENFNTLDLETLASVEGGRVNWERWGMCGASVAVGATIGGGVALLGC*	MGTQTIENFNTLDLETLASVEGG	RVNWERWGMCGASVAVGATIGGGVALLGC*	23	30	0.72069	2889.42	8.23143	0.939944
Ssal L61	2183704	2183871	168	ATGGTGACATTTATGTCACTACTTTTTTA	ATGACTAAGACCATTAACAATCGTAAAAACATGACTACTCAAGAACTTGAAACTGTATCAGGTGGAGTGGTTCCTTGGGCCGCTATTTCTGTTGGCATTGCTGCTGCAAAACTGACTTATGACCTTAGCTATGCTGCAGGTAAGTCTTTCTATAACCTCACCCACTAA	MTKTINNRKNMTTQELETVSGGVVPWAAISVGIAAAKLTYDLSYAAGKSFYNLTH*	MTKTINNRKNMTTQELETVSGG	VVPWAAISVGIAAAKLTYDLSYAAGKSFYNLTH*	22	34	0.587879	3496.84	9.03496	1.23835
Ssal L61	2183520	2183684	165	ATGGTGACATTTATGTCACTACTTTTTTA	ATGACAATGATTAACAAAGAAATGAAGGCAGCTGACCTAGCCTCAGTAACAGGAGGCGGATGGAAGACTAACCTTGCCATTGGAGGGCTCTGCCTAGCTTCAGGACCTATTGGAACTATGGTATGCCTTGGAGCCTACAATGGCTACATGGACTCTGCGAGATAA	MTMINKEMKAADLASVTGGGWKTNLAIGGLCLASGPIGTMVCLGAYNGYMDSAR*	MTMINKEMKAADLASVTGG	GWKTNLAIGGLCLASGPIGTMVCLGAYNGYMDSAR*	19	36	0.417143	3559.71	8.21289	0.937738
Ssal L61	2183526	2183684	159	ATGGTGACATTTATGTCACTACTTTTTTA	ATGATTAACAAAGAAATGAAGGCAGCTGACCTAGCCTCAGTAACAGGAGGCGGATGGAAGACTAACCTTGCCATTGGAGGGCTCTGCCTAGCTTCAGGACCTATTGGAACTATGGTATGCCTTGGAGCCTACAATGGCTACATGGACTCTGCGAGATAA	MINKEMKAADLASVTGGGWKTNLAIGGLCLASGPIGTMVCLGAYNGYMDSAR*	MINKEMKAADLASVTGG	GWKTNLAIGGLCLASGPIGTMVCLGAYNGYMDSAR*	17	36	0.417143	3559.71	8.21289	0.937738
Ssal L61	299646	299795	150	ATAGTGACATTTATGTCACTATTTTTTTG	ATGCGAACTAAGGTATATGGCGAAGAGCTCACTGCTGAAACGTTAGAAAATGTCACAGGGGGTGATTTTGTATCTAGACCTCAAACCTTACCTGAACGATTGGGTTGGAACAAATGGTGGTTGAAAAGAAAATACCCTTATGGTGATTAA	MRTKVYGEELTAETLENVTGGDFVSRPQTLPERLGWNKWWLKRKYPYGD*	MRTKVYGEELTAETLENVTGG	DFVSRPQTLPERLGWNKWWLKRKYPYGD*	21	29	-1.31071	3534.83	10.3219	3.00077
Ssal L61	363126	363356	231	GTAGTGACATTTATGTCACTACTTTTTTG	ATGACAACACAAATCATTAACAATTTTAACTCACTTAATTCCGAAGATCTTTCTACTGTTAAGGGTGGAGCATGTAGTTTTTGGGGAGCTACAGCTGCCGTAGGCGTCGGGGCTGTTGGAGGAGCCATTAAAGGTGGTATTCAAACAGGTACTTGGCAAGGTGCAGCCTTAAAGGGTATTGGTTATGGTATTAAAGATGGGATTACTTATGGCCTTATTTGTCGTTATTAG	MTTQIINNFNSLNSEDLSTVKGGACSFWGATAAVGVGAVGGAIKGGIQTGTWQGAALKGIGYGIKDGITYGLICRY*	MTTQIINNFNSLNSEDLSTVKGG	ACSFWGATAAVGVGAVGGAIKGGIQTGTWQGAALKGIGYGIKDGITYGLICRY*	23	54	0.524528	5203.67	9.26645	2.93663
Ssal L61	371739	371918	180	GTGGTGACATTTATGTCACTACTTTTTTG	ATGACAACACAAACAATGAACACTTTTGAAACACTCGATCTCGAGACACTTGCAAACGTTGAAGGTGGCGGATGGGTTAAGTGTTATGCCGGCACAATTGGCTCTGCTCTAGTAGGATCAGCAGGAGGCCCGGTAGGTTACTGGGGAGGAGCTTTAGTTGGCTATGCTACATTCTGCTAA	MTTQTMNTFETLDLETLANVEGGGWVKCYAGTIGSALVGSAGGPVGYWGGALVGYATFC*	MTTQTMNTFETLDLETLANVEGG	GWVKCYAGTIGSALVGSAGGPVGYWGGALVGYATFC*	23	37	0.763889	3494.68	8.2049	0.936154
Ssal L61	371754	371918	165	GTGGTGACATTTATGTCACTACTTTTTTG	ATGAACACTTTTGAAACACTCGATCTCGAGACACTTGCAAACGTTGAAGGTGGCGGATGGGTTAAGTGTTATGCCGGCACAATTGGCTCTGCTCTAGTAGGATCAGCAGGAGGCCCGGTAGGTTACTGGGGAGGAGCTTTAGTTGGCTATGCTACATTCTGCTAA	MNTFETLDLETLANVEGGGWVKCYAGTIGSALVGSAGGPVGYWGGALVGYATFC*	MNTFETLDLETLANVEGG	GWVKCYAGTIGSALVGSAGGPVGYWGGALVGYATFC*	18	37	0.763889	3494.68	8.2049	0.936154
Ssal L64	2107551	2107718	168	ATGGTGACATTTTTGTCACTACTTTTTTA	ATGACTAAGACCATTAACAATCGTAAAAACATGACTACTCAAGAACTTGAAGCTGTATCAGGTGGAGTAGTTCCTTGGGCCGCTATTTCTGTTGGCATCGCTGCTGCAAAACTGACTTATGACCTTAGCTATGCTGCAGGTAAGTCTTTCTATAACCTCACCCACTAA	MTKTINNRKNMTTQELEAVSGGVVPWAAISVGIAAAKLTYDLSYAAGKSFYNLTH*	MTKTINNRKNMTTQELEAVSGG	VVPWAAISVGIAAAKLTYDLSYAAGKSFYNLTH*	22	34	0.587879	3496.84	9.03496	1.23835
Ssal L64	2107367	2107531	165	ATGGTGACATTTTTGTCACTACTTTTTTA	ATGACAATGATTAACAAAGAAATGAAGGTAGCTGAGCTAGCCTCAGTAACAGGAGGCGGATGGAAGACCAACCTTGCCATTGGAGGGCTCTGCCTAGCTTCAGGACCTATTGGAACTATGGTATGCCTTGGAGCCTACAATGGCTACATGGACTCTGCGCGATAA	MTMINKEMKVAELASVTGGGWKTNLAIGGLCLASGPIGTMVCLGAYNGYMDSAR*	MTMINKEMKVAELASVTGG	GWKTNLAIGGLCLASGPIGTMVCLGAYNGYMDSAR*	19	36	0.417143	3559.71	8.21289	0.937738
Ssal L64	2107373	2107531	159	ATGGTGACATTTTTGTCACTACTTTTTTA	ATGATTAACAAAGAAATGAAGGTAGCTGAGCTAGCCTCAGTAACAGGAGGCGGATGGAAGACCAACCTTGCCATTGGAGGGCTCTGCCTAGCTTCAGGACCTATTGGAACTATGGTATGCCTTGGAGCCTACAATGGCTACATGGACTCTGCGCGATAA	MINKEMKVAELASVTGGGWKTNLAIGGLCLASGPIGTMVCLGAYNGYMDSAR*	MINKEMKVAELASVTGG	GWKTNLAIGGLCLASGPIGTMVCLGAYNGYMDSAR*	17	36	0.417143	3559.71	8.21289	0.937738
Ssal L64	270206	270355	150	ATAGTGACATTTATGTCACTATTTTTTTG	ATGCGAACTAAGGCATATGGCGAAGAGCTGACTGCTGAAACCTTAGAAAATGTCACAGGGGGTGATTTTGTATCTAGACCTCAAACCTTACCTGAACGATTGGGTTGGAACAAATGGTGGTTGAAAAGAAGACCTCCTTATGGCGATTAG	MRTKAYGEELTAETLENVTGGDFVSRPQTLPERLGWNKWWLKRRPPYGD*	MRTKAYGEELTAETLENVTGG	DFVSRPQTLPERLGWNKWWLKRRPPYGD*	21	29	-1.34286	3496.83	10.8569	3.00172
Ssal L64	340386	340619	234	GTGGTGACATACATGTCACTACTTTTTTG	ATGACAACACAAACAATGAACAATTTTGAAACACTCGATCTCGAGGCACTTGCAAACGTTGAAGGTGGAAATAGATGTAAAGATTTAATCTTTGGAGGAGCTTTAACTGGCGCAGGTGCTGGATTTACAGGTGGTATGGCAGCATTTGGTGTTACAGCATTTCCAGGAGCATTTGTAGGAGCACATGTTGGAGCAGTTGCTGGTGGGCTAGCATGTATCGGAGCGAGCTTTTAG	MTTQTMNNFETLDLEALANVEGGNRCKDLIFGGALTGAGAGFTGGMAAFGVTAFPGAFVGAHVGAVAGGLACIGASF*	MTTQTMNNFETLDLEALANVEGG	NRCKDLIFGGALTGAGAGFTGGMAAFGVTAFPGAFVGAHVGAVAGGLACIGASF*	23	55	0.996296	4987.47	8.24126	1.17958
Ssal L64	340401	340619	219	GTGGTGACATACATGTCACTACTTTTTTG	ATGAACAATTTTGAAACACTCGATCTCGAGGCACTTGCAAACGTTGAAGGTGGAAATAGATGTAAAGATTTAATCTTTGGAGGAGCTTTAACTGGCGCAGGTGCTGGATTTACAGGTGGTATGGCAGCATTTGGTGTTACAGCATTTCCAGGAGCATTTGTAGGAGCACATGTTGGAGCAGTTGCTGGTGGGCTAGCATGTATCGGAGCGAGCTTTTAG	MNNFETLDLEALANVEGGNRCKDLIFGGALTGAGAGFTGGMAAFGVTAFPGAFVGAHVGAVAGGLACIGASF*	MNNFETLDLEALANVEGG	NRCKDLIFGGALTGAGAGFTGGMAAFGVTAFPGAFVGAHVGAVAGGLACIGASF*	18	55	0.996296	4987.47	8.24126	1.17958
Ssal L64	340632	340820	189	GTGGTGACATACATGTCACTACTTTTTTG	ATGAATGTGACTAAGTATAATAAGATGTGCGATGCTGAGCTAGAAATTATTTCTGGTGGTGGGAAAGTTGGAGCAGTAATTGGTGGCTGTCTAGGTGGTATGCTCATGGCATGGGCAGCAGGACCTGTTTCCGCAGGGGGTTATACTATGATATGTGCTACTTCGGGGCTTGCAAATGCTTATTTTTGA	MNVTKYNKMCDAELEIISGGGKVGAVIGGCLGGMLMAWAAGPVSAGGYTMICATSGLANAYF*	MNVTKYNKMCDAELEIISGG	GKVGAVIGGCLGGMLMAWAAGPVSAGGYTMICATSGLANAYF*	20	43	0.985714	3992.91	8.21291	0.936947
Ssal L64	340638	340820	183	GTGGTGACATACATGTCACTACTTTTTTG	GTGACTAAGTATAATAAGATGTGCGATGCTGAGCTAGAAATTATTTCTGGTGGTGGGAAAGTTGGAGCAGTAATTGGTGGCTGTCTAGGTGGTATGCTCATGGCATGGGCAGCAGGACCTGTTTCCGCAGGGGGTTATACTATGATATGTGCTACTTCGGGGCTTGCAAATGCTTATTTTTGA	VTKYNKMCDAELEIISGGGKVGAVIGGCLGGMLMAWAAGPVSAGGYTMICATSGLANAYF*	VTKYNKMCDAELEIISGG	GKVGAVIGGCLGGMLMAWAAGPVSAGGYTMICATSGLANAYF*	18	43	0.985714	3992.91	8.21291	0.936947
Ssal N20	2012037	2012204	168	ATGGTGACATTTATGTCACTACTTTTTTA	ATGACTAAGACCATTAATAATCGTAAAAACATGACTACTCAAGAACTTGAAGCTGTATCAGGTGGAGTGGTTCCTTGGGCCGCTATTTCTGTTGGCATTGCTGCTGCAAAACTGACTTATGACCTTAGCTATGCTGCAGGTAAGTCTTTCTATAACCTCACCCACTAA	MTKTINNRKNMTTQELEAVSGGVVPWAAISVGIAAAKLTYDLSYAAGKSFYNLTH*	MTKTINNRKNMTTQELEAVSGG	VVPWAAISVGIAAAKLTYDLSYAAGKSFYNLTH*	22	34	0.587879	3496.84	9.03496	1.23835
Ssal N20	2011853	2012017	165	ATGGTGACATTTATGTCACTACTTTTTTA	ATGACAGTGATTAACAAAGAAATGAAGGCAGCTGACCTAGCCTCAGTAACAGGAGGCGGATGGAAGACTAACCTTGCCATTGGAGGGCTCTGCCTAGCTTCAGGACCTATTGGAACTATGGTATGCCTTGGAGCCTACAATGGCTACATGGACTCTGCGCGATAA	MTVINKEMKAADLASVTGGGWKTNLAIGGLCLASGPIGTMVCLGAYNGYMDSAR*	MTVINKEMKAADLASVTGG	GWKTNLAIGGLCLASGPIGTMVCLGAYNGYMDSAR*	19	36	0.417143	3559.71	8.21289	0.937738
Ssal N20	2011859	2012017	159	ATGGTGACATTTATGTCACTACTTTTTTA	GTGATTAACAAAGAAATGAAGGCAGCTGACCTAGCCTCAGTAACAGGAGGCGGATGGAAGACTAACCTTGCCATTGGAGGGCTCTGCCTAGCTTCAGGACCTATTGGAACTATGGTATGCCTTGGAGCCTACAATGGCTACATGGACTCTGCGCGATAA	VINKEMKAADLASVTGGGWKTNLAIGGLCLASGPIGTMVCLGAYNGYMDSAR*	VINKEMKAADLASVTGG	GWKTNLAIGGLCLASGPIGTMVCLGAYNGYMDSAR*	17	36	0.417143	3559.71	8.21289	0.937738
Ssal N20	260629	260778	150	ATAGTGACATTTATGTCACTATTTTTTTG	ATGCGAACTAAGGCATATGGCGAAGAGCTGACTGCTGAAACCTTAGAAAATGTCACAGGGGGTGATTTTGTATCTAGACCTCAAACCTTACCTGGACGATTGGGTTGGAATAGATGGTGGTTGAAAAGAAAATACCCTTATGGTGATTAG	MRTKAYGEELTAETLENVTGGDFVSRPQTLPGRLGWNRWWLKRKYPYGD*	MRTKAYGEELTAETLENVTGG	DFVSRPQTLPGRLGWNRWWLKRKYPYGD*	21	29	-1.22143	3490.82	10.9347	3.99967
Ssal N20	330256	330435	180	GTGGTGACATTTATGTCACTACTTTTTTG	ATGACAACACAAACAATGAACAATTTTGAAACACTCGATCTCGAGACACTTGCAAACGTTGAAGGTGGTGGATGGGTTAAGTGTTATGCCGGCACAATTGGATCTGCTCTAGTAGGATCAGCAGGAGGCCCAGTAGGTTACTGGGGAGGAGCTTTAGTTGGTTACGCCACATTCTGCTAA	MTTQTMNNFETLDLETLANVEGGGWVKCYAGTIGSALVGSAGGPVGYWGGALVGYATFC*	MTTQTMNNFETLDLETLANVEGG	GWVKCYAGTIGSALVGSAGGPVGYWGGALVGYATFC*	23	37	0.763889	3494.68	8.2049	0.936154
Ssal N20	330271	330435	165	GTGGTGACATTTATGTCACTACTTTTTTG	ATGAACAATTTTGAAACACTCGATCTCGAGACACTTGCAAACGTTGAAGGTGGTGGATGGGTTAAGTGTTATGCCGGCACAATTGGATCTGCTCTAGTAGGATCAGCAGGAGGCCCAGTAGGTTACTGGGGAGGAGCTTTAGTTGGTTACGCCACATTCTGCTAA	MNNFETLDLETLANVEGGGWVKCYAGTIGSALVGSAGGPVGYWGGALVGYATFC*	MNNFETLDLETLANVEGG	GWVKCYAGTIGSALVGSAGGPVGYWGGALVGYATFC*	18	37	0.763889	3494.68	8.2049	0.936154
Ssal N20	418931	419101	171	TTAGTGACATGAATGTCACTATTTTTTTC	ATGTTAGAAATAAATATGATTTATTCTGATTTATCACTTACTGAACTTGCTCAAATTAATGGGGGAGGAATTCTGTCAAGTGTAGCTGGACTTGTTAAAGATACCTGGGGAACGTTATATTCTACAGGAAGAGACTTTGGACGTAGCGTTGTTAACGCTGCTATGCCTTAA	MLEINMIYSDLSLTELAQINGGGILSSVAGLVKDTWGTLYSTGRDFGRSVVNAAMP*	MLEINMIYSDLSLTELAQINGG	GILSSVAGLVKDTWGTLYSTGRDFGRSVVNAAMP*	22	35	0.244118	3524.81	9.2964	1.00063
Ssal N20	419113	419283	171	TTAGTGACATGAATGTCACTATTTTTTTC	ATGTATAGAGAAAAGAGAAATGATGAAGAACTGAATATTAATGATCTTGCCATGATTAATGGTGGAGTAGCCCCTGTAGTTATTGCTGTAGGGGTAGTTGCGACACCATTCGTACTGGGCGCGATTGCTGGAGGCGCAGATGAGTACGCAAGAAAGAGAGGGCATCACTGA	MYREKRNDEELNINDLAMINGGVAPVVIAVGVVATPFVLGAIAGGADEYARKRGHH*	MYREKRNDEELNINDLAMINGG	VAPVVIAVGVVATPFVLGAIAGGADEYARKRGHH*	22	35	0.708824	3396.88	9.30118	1.4816
Ssal N20	418946	419101	156	TTAGTGACATGAATGTCACTATTTTTTTC	ATGATTTATTCTGATTTATCACTTACTGAACTTGCTCAAATTAATGGGGGAGGAATTCTGTCAAGTGTAGCTGGACTTGTTAAAGATACCTGGGGAACGTTATATTCTACAGGAAGAGACTTTGGACGTAGCGTTGTTAACGCTGCTATGCCTTAA	MIYSDLSLTELAQINGGGILSSVAGLVKDTWGTLYSTGRDFGRSVVNAAMP*	MIYSDLSLTELAQINGG	GILSSVAGLVKDTWGTLYSTGRDFGRSVVNAAMP*	17	35	0.244118	3524.81	9.2964	1.00063
Ssal N5	2065091	2065258	168	ATGGTGACATTTATGTCACTACTTTTTTA	ATGACTAAGACCATTAACAATCGTAAAAACATGACTACTCAAGAACTTGAAGCTGTATCAGGTGGAGTGGTTCCTTGGGCCGCTATTTCTGTTGGCATTGCTGCTGCAAAACTGACTTATGACCTTAGCTATGCTGCAGGTAAGTCTTTCTATAACCTCACCCACTAA	MTKTINNRKNMTTQELEAVSGGVVPWAAISVGIAAAKLTYDLSYAAGKSFYNLTH*	MTKTINNRKNMTTQELEAVSGG	VVPWAAISVGIAAAKLTYDLSYAAGKSFYNLTH*	22	34	0.587879	3496.84	9.03496	1.23835
Ssal N5	2064907	2065071	165	ATGGTGACATTTATGTCACTACTTTTTTA	ATGACAGTGATTAACAAAGAAATGAAGGCAGCTGACCTAGCCTCAGTAACAGGAGGCGGATGGAAGACTAACCTTGCCATTGGAGGGCTCTGCCTAGCTTCAAGACCTATTGGAACTATGGTATGCCTTGGAGCCTACAATGGCTACATGGACTCTGCGCGATAA	MTVINKEMKAADLASVTGGGWKTNLAIGGLCLASRPIGTMVCLGAYNGYMDSAR*	MTVINKEMKAADLASVTGG	GWKTNLAIGGLCLASRPIGTMVCLGAYNGYMDSAR*	19	36	0.3	3658.79	8.77177	1.93773
Ssal N5	2064913	2065071	159	ATGGTGACATTTATGTCACTACTTTTTTA	GTGATTAACAAAGAAATGAAGGCAGCTGACCTAGCCTCAGTAACAGGAGGCGGATGGAAGACTAACCTTGCCATTGGAGGGCTCTGCCTAGCTTCAAGACCTATTGGAACTATGGTATGCCTTGGAGCCTACAATGGCTACATGGACTCTGCGCGATAA	VINKEMKAADLASVTGGGWKTNLAIGGLCLASRPIGTMVCLGAYNGYMDSAR*	VINKEMKAADLASVTGG	GWKTNLAIGGLCLASRPIGTMVCLGAYNGYMDSAR*	17	36	0.3	3658.79	8.77177	1.93773
Ssal N5	284639	284788	150	GTAGTGACATTTATGTCACTATTTTTTTG	ATGCGAACTAAGGCATATGGTGAAGAGCTCAATGCTGAAATCTTAGAAAGTGTTACAGGGGGTGGTTTTGTATCTAAACCTCAAACCTTACCTGAACGATTGGGTTGGAACAAATGGTGGTTGAAAAGAAGACCTCCTTATGGCGATTAG	MRTKAYGEELNAEILESVTGGGFVSKPQTLPERLGWNKWWLKRRPPYGD*	MRTKAYGEELNAEILESVTGG	GFVSKPQTLPERLGWNKWWLKRRPPYGD*	21	29	-1.21071	3410.82	11.0904	4.00077
Ssal N5	352070	352300	231	GTAGTGACATAAATGTCACTATTTTTTTG	ATGACAACACAAATCATTAACAATTTTAATTCACTTAATTCCGAAGATCTTTCTACTGTTAAGGGGGGAGCATGTAGTTTTTGGGGAGCTACAGCTGCCGTAGGTGTCGGGGCTGTTGGAGGAGCCGTTAAAGGTGGTATTCAAACAGGTACTTGGCAAGGTGCAGCCTTAAAGGGTATTGGTTATGGTATTAAAGGTGGGATTACTTATGGCCTTACTTGTCGTTATTAG	MTTQIINNFNSLNSEDLSTVKGGACSFWGATAAVGVGAVGGAVKGGIQTGTWQGAALKGIGYGIKGGITYGLTCRY*	MTTQIINNFNSLNSEDLSTVKGG	ACSFWGATAAVGVGAVGGAVKGGIQTGTWQGAALKGIGYGIKGGITYGLTCRY*	23	54	0.479245	5119.62	9.74961	3.93583
Ssal N5	360665	360844	180	GTGGTGACATACATGTCACTACTTTTTTG	ATGACAACACAAACAATGAACAATTTTGAAACACTCGATCTCGAGGCACTTGCAAACGTTGAAGGTGGTGGATGGGTTAAGTGTTATGCCGGCACAATCGGATCTGCTCTAGTAGGATCAGCAGGAGGCCCAGTAGGTTACTGGGGAGGAGCTTTAGTTGGTTATGCCACATTCTGCTAA	MTTQTMNNFETLDLEALANVEGGGWVKCYAGTIGSALVGSAGGPVGYWGGALVGYATFC*	MTTQTMNNFETLDLEALANVEGG	GWVKCYAGTIGSALVGSAGGPVGYWGGALVGYATFC*	23	37	0.763889	3494.68	8.2049	0.936154
Ssal N5	360680	360844	165	GTGGTGACATACATGTCACTACTTTTTTG	ATGAACAATTTTGAAACACTCGATCTCGAGGCACTTGCAAACGTTGAAGGTGGTGGATGGGTTAAGTGTTATGCCGGCACAATCGGATCTGCTCTAGTAGGATCAGCAGGAGGCCCAGTAGGTTACTGGGGAGGAGCTTTAGTTGGTTATGCCACATTCTGCTAA	MNNFETLDLEALANVEGGGWVKCYAGTIGSALVGSAGGPVGYWGGALVGYATFC*	MNNFETLDLEALANVEGG	GWVKCYAGTIGSALVGSAGGPVGYWGGALVGYATFC*	18	37	0.763889	3494.68	8.2049	0.936154
UBSS01	396723	396917	195	ATGGTGACATTTATGTCACTATTTTTTGT	ATGGTATTGAATTTAGAAAATGTAAACTGTGTTACTCTTCAAGATGAAGAATTGATGATGGTTAACGGAGGTCTTGCACCGATTGTAATTGGTGGAGTTGTCGTAGGTTGGAAGGTCATTGGTGGCGTTGCAGGTGTTATAGCAGCAAGTGGTGCTGCAGGGATTGCAGCAGGTTATTATGCTAATCGTCCTTAA	MVLNLENVNCVTLQDEELMMVNGGLAPIVIGGVVVGWKVIGGVAGVIAASGAAGIAAGYYANRP*	MVLNLENVNCVTLQDEELMMVNGG	LAPIVIGGVVVGWKVIGGVAGVIAASGAAGIAAGYYANRP*	24	41	1.2225	3734.1	10.0086	1.99825
UBSS01	396729	396917	189	ATGGTGACATTTATGTCACTATTTTTTGT	TTGAATTTAGAAAATGTAAACTGTGTTACTCTTCAAGATGAAGAATTGATGATGGTTAACGGAGGTCTTGCACCGATTGTAATTGGTGGAGTTGTCGTAGGTTGGAAGGTCATTGGTGGCGTTGCAGGTGTTATAGCAGCAAGTGGTGCTGCAGGGATTGCAGCAGGTTATTATGCTAATCGTCCTTAA	LNLENVNCVTLQDEELMMVNGGLAPIVIGGVVVGWKVIGGVAGVIAASGAAGIAAGYYANRP*	LNLENVNCVTLQDEELMMVNGG	LAPIVIGGVVVGWKVIGGVAGVIAASGAAGIAAGYYANRP*	22	41	1.2225	3734.1	10.0086	1.99825
UBSS01	397137	397292	156	ATGGTGACATTTATGTCACTATTTTTTGT	ATGTCTAAAAAATATGAGTTGAGTAAAAAAGAATTACAGGAAATTCAAGGAGGTGTTGCACCAATTATGGTTGCTATTGGTTTAGGAAGTCTAGCAGTAGCATCATTTAGTTCAGGATATAAATTTGGAACAGATTTAGCTAGACGTGGACGATAG	MSKKYELSKKELQEIQGGVAPIMVAIGLGSLAVASFSSGYKFGTDLARRGR*	MSKKYELSKKELQEIQGG	VAPIMVAIGLGSLAVASFSSGYKFGTDLARRGR*	18	34	0.6	3366.82	11.4308	2.99983
UBSS01	1157916	1158116	201	ATAGTGACATTTATGTCACTATTTTTTAT	TTGAAAACATCAGAAATGACACAACAAGTATTGACACATCAGGAATTATCAGTGGTTGTAGGTGGTGGATGTAGTTGGAACAATGCAGCTAAGGCAGCCCTCGGAACAAGTATCACGGGTCTTATCACTAGTGGCCCAGGAGGAGCTTTATTGGGATTAGCTGGAGGAGCAGTAAGTTACGGAGCGTTGTGTTGGGTATGA	LKTSEMTQQVLTHQELSVVVGGGCSWNNAAKAALGTSITGLITSGPGGALLGLAGGAVSYGALCWV*	LKTSEMTQQVLTHQELSVVVGG	GCSWNNAAKAALGTSITGLITSGPGGALLGLAGGAVSYGALCWV*	22	45	0.788636	4105.08	8.22118	0.937741
UBSS01	1157931	1158116	186	ATAGTGACATTTATGTCACTATTTTTTAT	ATGACACAACAAGTATTGACACATCAGGAATTATCAGTGGTTGTAGGTGGTGGATGTAGTTGGAACAATGCAGCTAAGGCAGCCCTCGGAACAAGTATCACGGGTCTTATCACTAGTGGCCCAGGAGGAGCTTTATTGGGATTAGCTGGAGGAGCAGTAAGTTACGGAGCGTTGTGTTGGGTATGA	MTQQVLTHQELSVVVGGGCSWNNAAKAALGTSITGLITSGPGGALLGLAGGAVSYGALCWV*	MTQQVLTHQELSVVVGG	GCSWNNAAKAALGTSITGLITSGPGGALLGLAGGAVSYGALCWV*	17	45	0.788636	4105.08	8.22118	0.937741
UBSS01	1169296	1169445	150	ATAGTGACATTTATGTCACTATTTTTTTG	ATGCGAACTAAGGCGTATGGTGAAGAGCTCAATGCTGACACCTTAGAAAATGTTACAGGGGGTGGTTTTGTATCTAAACCTCAAACCTTACCTGAACGATTGGGTTGGAACAAATGGTGGTTGAAAAGAAGACCTCCTTATGGCGATTAG	MRTKAYGEELNADTLENVTGGGFVSKPQTLPERLGWNKWWLKRRPPYGD*	MRTKAYGEELNADTLENVTGG	GFVSKPQTLPERLGWNKWWLKRRPPYGD*	21	29	-1.21071	3410.82	11.0904	4.00077
UBSS01	1234802	1235038	237	GTGGTGACATTAATGTCACTACTTTTTTG	ATGACAACACAAATCATTAACAATTTTTATTCACTTAATTCCGAAGATCTTTCTATTATCGAAGGTGGTGGTGTGATTGGTTGTGTAGCTGTGACCGCTGGATCTGCTGGACTGGGATTTTTGACTGGAACATCAGTTGGAACTGTTACATTTCCAATTGTTGGGACTGTTTCAGGTGGAGTATTTGGGGCATGGTCAGGAGCCGGCCTTGGAATGGCTACATTTTGCGGAGTTTAG	MTTQIINNFYSLNSEDLSIIEGGGVIGCVAVTAGSAGLGFLTGTSVGTVTFPIVGTVSGGVFGAWSGAGLGMATFCGV*	MTTQIINNFYSLNSEDLSIIEGG	GVIGCVAVTAGSAGLGFLTGTSVGTVTFPIVGTVSGGVFGAWSGAGLGMATFCGV*	23	56	1.28182	5020.52	5.826	-0.0613069
UBSS01	1243401	1243580	180	GTGGTGACATACATGTCACTACTTTTTTG	ATGACAACACAAACAATGAACAATTTTGAAACACTCGATCTCGAGACACTTGCAAACGTTGAAGGTGGCGGATGGGTTAAGTGTTATGCAGGCACAATTGGCTCTGCTCTAGTAGGATCAGCAGGAGGCCCAGTAGGTTACTGGGGAGGAGCTTTAGTTGGTTACGCCACATTCTGCTAA	MTTQTMNNFETLDLETLANVEGGGWVKCYAGTIGSALVGSAGGPVGYWGGALVGYATFC*	MTTQTMNNFETLDLETLANVEGG	GWVKCYAGTIGSALVGSAGGPVGYWGGALVGYATFC*	23	37	0.763889	3494.68	8.2049	0.936154
UBSS01	1243416	1243580	165	GTGGTGACATACATGTCACTACTTTTTTG	ATGAACAATTTTGAAACACTCGATCTCGAGACACTTGCAAACGTTGAAGGTGGCGGATGGGTTAAGTGTTATGCAGGCACAATTGGCTCTGCTCTAGTAGGATCAGCAGGAGGCCCAGTAGGTTACTGGGGAGGAGCTTTAGTTGGTTACGCCACATTCTGCTAA	MNNFETLDLETLANVEGGGWVKCYAGTIGSALVGSAGGPVGYWGGALVGYATFC*	MNNFETLDLETLANVEGG	GWVKCYAGTIGSALVGSAGGPVGYWGGALVGYATFC*	18	37	0.763889	3494.68	8.2049	0.936154
UBSS01	1364628	1364798	171	TTAGTGACATCTATGTCACTATTTTTTTC	ATGTTAGAAATAAATATGATTTATTCTGACTTATCACTTACTGAACTTGCTCAAATTAATGGGGGAGGGATTATGTCAAGTGTAGCTGGACTTGTTAAAGATACCTGGGGAACGTTATATTCTACAGGAAGAGACTTTGGACGTAGCGTTGTTAACGCTGCTATGCCTTAA	MLEINMIYSDLSLTELAQINGGGIMSSVAGLVKDTWGTLYSTGRDFGRSVVNAAMP*	MLEINMIYSDLSLTELAQINGG	GIMSSVAGLVKDTWGTLYSTGRDFGRSVVNAAMP*	22	35	0.188235	3542.76	9.2964	1.00063
UBSS01	1364810	1364980	171	TTAGTGACATCTATGTCACTATTTTTTTC	ATGTATAGAGAAAAGAGAAATGATGAAGAACTGAATATTAATGATCTTGCCATGATTAATGGTGGAGTAGCCCCTGTAGTTATTGCTGTAGGGGTAATTGCGACACCATTTGTATTGGGCGCGATTGCTGGAGGCGCAGATGAGTACGCAAGGAAGAGAGGGCATCACTGA	MYREKRNDEELNINDLAMINGGVAPVVIAVGVIATPFVLGAIAGGADEYARKRGHH*	MYREKRNDEELNINDLAMINGG	VAPVVIAVGVIATPFVLGAIAGGADEYARKRGHH*	22	35	0.717647	3410.89	9.30118	1.4816
UBSS01	510732	510899	168	ATGGTGACATTTATGTCACTACTTTTATA	ATGACTAAGACCATTAACAATCGTAAAAACATGACTACTCAAGAACTTGAAGCTGTATCAGGTGGAGTGGTTCCTTGGGCCGCTATTTCTGTTGGCATTGCTGCTGCAAAACTGACTTATGACCTTAGCTATGCTGCAGGTAAGTCTTTCTATAACCTCACCCACTAA	MTKTINNRKNMTTQELEAVSGGVVPWAAISVGIAAAKLTYDLSYAAGKSFYNLTH*	MTKTINNRKNMTTQELEAVSGG	VVPWAAISVGIAAAKLTYDLSYAAGKSFYNLTH*	22	34	0.587879	3496.84	9.03496	1.23835
UBSS01	510548	510712	165	ATGGTGACATTTATGTCACTACTTTTATA	ATGACAATGATTAATAAAGAAATGAAGGCAGCTGACCTAGCCTCAGTAACAGGAGGCGGATGGAAGACTAACCTTGCCATTGGAGGGCTCTGCCTAGCTTCAGGACCTATTGGAACTATGATGTGCCTTGGAGCCTACAATGGCTACATGGACTCTGCGCGATAA	MTMINKEMKAADLASVTGGGWKTNLAIGGLCLASGPIGTMMCLGAYNGYMDSAR*	MTMINKEMKAADLASVTGG	GWKTNLAIGGLCLASGPIGTMMCLGAYNGYMDSAR*	19	36	0.351429	3591.68	8.21289	0.937738
UBSS01	510554	510712	159	ATGGTGACATTTATGTCACTACTTTTATA	ATGATTAATAAAGAAATGAAGGCAGCTGACCTAGCCTCAGTAACAGGAGGCGGATGGAAGACTAACCTTGCCATTGGAGGGCTCTGCCTAGCTTCAGGACCTATTGGAACTATGATGTGCCTTGGAGCCTACAATGGCTACATGGACTCTGCGCGATAA	MINKEMKAADLASVTGGGWKTNLAIGGLCLASGPIGTMMCLGAYNGYMDSAR*	MINKEMKAADLASVTGG	GWKTNLAIGGLCLASGPIGTMMCLGAYNGYMDSAR*	17	36	0.351429	3591.68	8.21289	0.937738
UC3162	1242831	1242959	129	TTACTGACTTCAATTTCTCTATTTCTTTA	ATGGCAACACTGGCTTTGATGAAGCTTTCTGTCAAGCCCTTGCGTGGTGGGTCCACAATGATAACATCTGGTTTGATGCCATCCTTGCTCCACTTGGCCATGGTATTTTCAGCTGAGTCGGCTACATAG	MATLALMKLSVKPLRGGSTMITSGLMPSLLHLAMVFSAESAT*	MATLALMKLSVKPLRGG	STMITSGLMPSLLHLAMVFSAESAT*	17	26	0.92	2594.28	5.36348	-0.75849
UC3162	1615926	1616075	150	ATAGTGACATTTATGTCACTATTTTTTTG	ATGCGAACTAAGGTATATGGCGAAGAGCTCACTGCTGAAACGTTAGAAAATGTCACAGGGGGTGATTTTGTATCTAGACCTCAAACCTTACCTGAACGATTGGGTTGGAACAAATGGTGGTTGAAAAGAAAATACCCTTATGGTGATTAA	MRTKVYGEELTAETLENVTGGDFVSRPQTLPERLGWNKWWLKRKYPYGD*	MRTKVYGEELTAETLENVTGG	DFVSRPQTLPERLGWNKWWLKRKYPYGD*	21	29	-1.31071	3534.83	10.3219	3.00077
UC3162	1764941	1765171	231	GTAGTGACATTTATGTCACTACTTTTTTG	ATGACAACACAAATCATTAACAATTTTAACTCACTTAATTCCGAAGATCTTTCTACTGTTAAGGGTGGAGCATGTAGTTTTTGGGGAGCTACAGCTGCCGTAGGCGTCGGGGCTGTTGGAGGAGCCATTAAAGGTGGTATTCAAACAGGTACTTGGCAAGGTGCAGCCTTAAAGGGTATTGGTTATGGTATTAAAGATGGGATTACTTATGGCCTTATTTGTCGTTATTAG	MTTQIINNFNSLNSEDLSTVKGGACSFWGATAAVGVGAVGGAIKGGIQTGTWQGAALKGIGYGIKDGITYGLICRY*	MTTQIINNFNSLNSEDLSTVKGG	ACSFWGATAAVGVGAVGGAIKGGIQTGTWQGAALKGIGYGIKDGITYGLICRY*	23	54	0.524528	5203.67	9.26645	2.93663
UC3162	1773548	1773778	231	GTGGTGACATTTATGTCACTACTTTTTTG	ATGACAACACAAACAATGAACACTTTTGAAACACTCGATCTCGAGACACTTGCAAACGTTGAAGGTGGTGGATGTAGCTGGGGAGGTTTTGCTAAACAAGGAGTAGCTACAGGAGTTGGTAATGGTTTACGATTAGGTATCAAAACACGTACTTGGCAAGGTGCTGTCGCAGGAGCAGCTGGAGGTGCTATTGTAGGGGGTGTTGGTTATGGAGCAACATGCTGGTGGTGA	MTTQTMNTFETLDLETLANVEGGGCSWGGFAKQGVATGVGNGLRLGIKTRTWQGAVAGAAGGAIVGGVGYGATCWW*	MTTQTMNTFETLDLETLANVEGG	GCSWGGFAKQGVATGVGNGLRLGIKTRTWQGAVAGAAGGAIVGGVGYGATCWW*	23	54	0.332075	5136.57	10.2636	3.93758
UC3162	1773563	1773778	216	GTGGTGACATTTATGTCACTACTTTTTTG	ATGAACACTTTTGAAACACTCGATCTCGAGACACTTGCAAACGTTGAAGGTGGTGGATGTAGCTGGGGAGGTTTTGCTAAACAAGGAGTAGCTACAGGAGTTGGTAATGGTTTACGATTAGGTATCAAAACACGTACTTGGCAAGGTGCTGTCGCAGGAGCAGCTGGAGGTGCTATTGTAGGGGGTGTTGGTTATGGAGCAACATGCTGGTGGTGA	MNTFETLDLETLANVEGGGCSWGGFAKQGVATGVGNGLRLGIKTRTWQGAVAGAAGGAIVGGVGYGATCWW*	MNTFETLDLETLANVEGG	GCSWGGFAKQGVATGVGNGLRLGIKTRTWQGAVAGAAGGAIVGGVGYGATCWW*	18	54	0.332075	5136.57	10.2636	3.93758
UC3162	43132	43299	168	ATGGTGACATTTATGTCACTACTTTTTTA	ATGACTAAGACCATTAACAATCGTAAAAACATGACTACTCAAGAACTTGAAACTGTATCAGGTGGAGTGGTTCCTTGGGCCGCTATTTCTGTTGGCATTGCTGCTGCAAAACTGACTTATGACCTTAGCTATGCTGCAGGTAAGTCTTTCTATAACCTCACCCACTAA	MTKTINNRKNMTTQELETVSGGVVPWAAISVGIAAAKLTYDLSYAAGKSFYNLTH*	MTKTINNRKNMTTQELETVSGG	VVPWAAISVGIAAAKLTYDLSYAAGKSFYNLTH*	22	34	0.587879	3496.84	9.03496	1.23835
UC3162	42948	43112	165	ATGGTGACATTTATGTCACTACTTTTTTA	ATGACAATGATTAACAAAGAAATGAAGGCAGCTGACCTAGCCTCAGTAACAGGAGGCGGATGGAAGACTAACCTTGCCATTGGAGGGCTCTGCCTAGCTTCAGGACCTATTGGAACTATGGTATGCCTTGGAGCCTACAATGGCTACATGGACTCTGCGAGATAA	MTMINKEMKAADLASVTGGGWKTNLAIGGLCLASGPIGTMVCLGAYNGYMDSAR*	MTMINKEMKAADLASVTGG	GWKTNLAIGGLCLASGPIGTMVCLGAYNGYMDSAR*	19	36	0.417143	3559.71	8.21289	0.937738
UC3162	42954	43112	159	ATGGTGACATTTATGTCACTACTTTTTTA	ATGATTAACAAAGAAATGAAGGCAGCTGACCTAGCCTCAGTAACAGGAGGCGGATGGAAGACTAACCTTGCCATTGGAGGGCTCTGCCTAGCTTCAGGACCTATTGGAACTATGGTATGCCTTGGAGCCTACAATGGCTACATGGACTCTGCGAGATAA	MINKEMKAADLASVTGGGWKTNLAIGGLCLASGPIGTMVCLGAYNGYMDSAR*	MINKEMKAADLASVTGG	GWKTNLAIGGLCLASGPIGTMVCLGAYNGYMDSAR*	17	36	0.417143	3559.71	8.21289	0.937738
UMB0051	2090349	2090582	234	GTGGTGACATACATGTCACTACTTTTTTG	ATGACAACACAAACAATGAACAATTTTGAAACACTCGATCTCGAGGCACTTGCAAACGTTGAAGGTGGAAATAGATGTAAAGATTTAATCTTTGGAGGAGCTTTAACTGGCGCAGGTGCTGGATTTACAGGTGGTATGGCAGCATTTGGTGTTACAGCATTTCCAGGAGCATTTGTAGGAGCACATGTTGGAGCAGTTGCTGGTGGGCTAGCATGTATCGGAGCGAGCTTTTAG	MTTQTMNNFETLDLEALANVEGGNRCKDLIFGGALTGAGAGFTGGMAAFGVTAFPGAFVGAHVGAVAGGLACIGASF*	MTTQTMNNFETLDLEALANVEGG	NRCKDLIFGGALTGAGAGFTGGMAAFGVTAFPGAFVGAHVGAVAGGLACIGASF*	23	55	0.996296	4987.47	8.24126	1.17958
UMB0051	2090364	2090582	219	GTGGTGACATACATGTCACTACTTTTTTG	ATGAACAATTTTGAAACACTCGATCTCGAGGCACTTGCAAACGTTGAAGGTGGAAATAGATGTAAAGATTTAATCTTTGGAGGAGCTTTAACTGGCGCAGGTGCTGGATTTACAGGTGGTATGGCAGCATTTGGTGTTACAGCATTTCCAGGAGCATTTGTAGGAGCACATGTTGGAGCAGTTGCTGGTGGGCTAGCATGTATCGGAGCGAGCTTTTAG	MNNFETLDLEALANVEGGNRCKDLIFGGALTGAGAGFTGGMAAFGVTAFPGAFVGAHVGAVAGGLACIGASF*	MNNFETLDLEALANVEGG	NRCKDLIFGGALTGAGAGFTGGMAAFGVTAFPGAFVGAHVGAVAGGLACIGASF*	18	55	0.996296	4987.47	8.24126	1.17958
UMB0051	2090595	2090783	189	GTGGTGACATACATGTCACTACTTTTTTG	ATGAATGTGACTAAGTATAATAAGATGTGCGATGCTGAGCTAGAAATTATTTCTGGTGGTGGGAAAGTTGGAGCAGTAATTGGTGGCTGTCTAGGTGGTATGCTCATGGCATGGGCAGCAGGACCTGTTTCCGCAGGGGGTTATACTATGATATGTGCTACTTCGGGGCTTGCAAATGCTTATTTTTGA	MNVTKYNKMCDAELEIISGGGKVGAVIGGCLGGMLMAWAAGPVSAGGYTMICATSGLANAYF*	MNVTKYNKMCDAELEIISGG	GKVGAVIGGCLGGMLMAWAAGPVSAGGYTMICATSGLANAYF*	20	43	0.985714	3992.91	8.21291	0.936947
UMB0051	2090601	2090783	183	GTGGTGACATACATGTCACTACTTTTTTG	GTGACTAAGTATAATAAGATGTGCGATGCTGAGCTAGAAATTATTTCTGGTGGTGGGAAAGTTGGAGCAGTAATTGGTGGCTGTCTAGGTGGTATGCTCATGGCATGGGCAGCAGGACCTGTTTCCGCAGGGGGTTATACTATGATATGTGCTACTTCGGGGCTTGCAAATGCTTATTTTTGA	VTKYNKMCDAELEIISGGGKVGAVIGGCLGGMLMAWAAGPVSAGGYTMICATSGLANAYF*	VTKYNKMCDAELEIISGG	GKVGAVIGGCLGGMLMAWAAGPVSAGGYTMICATSGLANAYF*	18	43	0.985714	3992.91	8.21291	0.936947
UMB0051	1782727	1782876	150	ATAGTGACATTTATGTCACTATTTTTTTG	ATGCGAACTAAGGCATATGGCGAAGAGCTGACTGCTGAAACCTTAGAAAATGTCACAGGGGGTGATTTTGTATCTAGACCTCAAACCTTACCTGAACGATTGGGTTGGAACAAATGGTGGTTGAAAAGAAGACCTCCTTATGGCGATTAG	MRTKAYGEELTAETLENVTGGDFVSRPQTLPERLGWNKWWLKRRPPYGD*	MRTKAYGEELTAETLENVTGG	DFVSRPQTLPERLGWNKWWLKRRPPYGD*	21	29	-1.34286	3496.83	10.8569	3.00172
UMB0051	1940751	1940918	168	ATGGTGACATTTTTGTCACTACTTTTTTA	ATGACTAAGACCATTAACAATCGTAAAAACATGACTACTCAAGAACTTGAAGCTGTATCAGGTGGAGTAGTTCCTTGGGCCGCTATTTCTGTTGGCATCGCTGCTGCAAAACTGACTTATGACCTTAGCTATGCTGCAGGTAAGTCTTTCTATAACCTCACCCACTAA	MTKTINNRKNMTTQELEAVSGGVVPWAAISVGIAAAKLTYDLSYAAGKSFYNLTH*	MTKTINNRKNMTTQELEAVSGG	VVPWAAISVGIAAAKLTYDLSYAAGKSFYNLTH*	22	34	0.587879	3496.84	9.03496	1.23835
UMB0051	1940567	1940731	165	ATGGTGACATTTTTGTCACTACTTTTTTA	ATGACAATGATTAACAAAGAAATGAAGGTAGCTGAGCTAGCCTCAGTAACAGGAGGCGGATGGAAGACCAACCTTGCCATTGGAGGGCTCTGCCTAGCTTCAGGACCTATTGGAACTATGGTATGCCTTGGAGCCTACAATGGCTACATGGACTCTGCGCGATAA	MTMINKEMKVAELASVTGGGWKTNLAIGGLCLASGPIGTMVCLGAYNGYMDSAR*	MTMINKEMKVAELASVTGG	GWKTNLAIGGLCLASGPIGTMVCLGAYNGYMDSAR*	19	36	0.417143	3559.71	8.21289	0.937738
UMB0051	1940573	1940731	159	ATGGTGACATTTTTGTCACTACTTTTTTA	ATGATTAACAAAGAAATGAAGGTAGCTGAGCTAGCCTCAGTAACAGGAGGCGGATGGAAGACCAACCTTGCCATTGGAGGGCTCTGCCTAGCTTCAGGACCTATTGGAACTATGGTATGCCTTGGAGCCTACAATGGCTACATGGACTCTGCGCGATAA	MINKEMKVAELASVTGGGWKTNLAIGGLCLASGPIGTMVCLGAYNGYMDSAR*	MINKEMKVAELASVTGG	GWKTNLAIGGLCLASGPIGTMVCLGAYNGYMDSAR*	17	36	0.417143	3559.71	8.21289	0.937738
VA08-2AN	1125222	1125452	231	GTAGTGACATTTATGTCACTACTTTTTTG	ATGACAACACAAATCATTAACAATTTTAACTCACTTAATTCCGAAGATCTTTCTACTGTTAAGGGTGGAGCATGTAGTTTTTGGGGAGCTACAGCTGCCGTAGGCGTCGGGGCTGTTGGAGGAGCCATTAAAGGTGGTATTCAAACAGGTACTTGGCAAGGTGCAGCCTTAAAGGGTATTGGTTATGGTATTAAAGATGGGATTACTTATGGCCTTATTTGTCGTTATTAG	MTTQIINNFNSLNSEDLSTVKGGACSFWGATAAVGVGAVGGAIKGGIQTGTWQGAALKGIGYGIKDGITYGLICRY*	MTTQIINNFNSLNSEDLSTVKGG	ACSFWGATAAVGVGAVGGAIKGGIQTGTWQGAALKGIGYGIKDGITYGLICRY*	23	54	0.524528	5203.67	9.26645	2.93663
VA08-2AN	1133835	1134014	180	GTGGTGACATTTATGTCACTACTTTTTTG	ATGACAACACAAACAATGAACACTTTTGAAACACTCGATCTCGAGACACTTGCAAACGTTGAAGGTGGCGGATGGGTTAAGTGTTATGCCGGCACAATTGGCTCTGCTCTAGTAGGATCAGCAGGAGGCCCGGTAGGTTACTGGGGAGGAGCTTTAGTTGGCTATGCTACATTCTGCTAA	MTTQTMNTFETLDLETLANVEGGGWVKCYAGTIGSALVGSAGGPVGYWGGALVGYATFC*	MTTQTMNTFETLDLETLANVEGG	GWVKCYAGTIGSALVGSAGGPVGYWGGALVGYATFC*	23	37	0.763889	3494.68	8.2049	0.936154
VA08-2AN	1133850	1134014	165	GTGGTGACATTTATGTCACTACTTTTTTG	ATGAACACTTTTGAAACACTCGATCTCGAGACACTTGCAAACGTTGAAGGTGGCGGATGGGTTAAGTGTTATGCCGGCACAATTGGCTCTGCTCTAGTAGGATCAGCAGGAGGCCCGGTAGGTTACTGGGGAGGAGCTTTAGTTGGCTATGCTACATTCTGCTAA	MNTFETLDLETLANVEGGGWVKCYAGTIGSALVGSAGGPVGYWGGALVGYATFC*	MNTFETLDLETLANVEGG	GWVKCYAGTIGSALVGSAGGPVGYWGGALVGYATFC*	18	37	0.763889	3494.68	8.2049	0.936154
VA08-2AN	33628	33777	150	ATAGTGACATTTATGTCACTATTTTTTTG	ATGCGAACTAAGGTATATGGCGAAGAGCTCACTGCTGAAACGTTAGAAAATGTCACAGGGGGTGATTTTGTATCTAGACCTCAAACCTTACCTGAACGATTGGGTTGGAACAAATGGTGGTTGAAAAGAAAATACCCTTATGGTGATTAA	MRTKVYGEELTAETLENVTGGDFVSRPQTLPERLGWNKWWLKRKYPYGD*	MRTKVYGEELTAETLENVTGG	DFVSRPQTLPERLGWNKWWLKRKYPYGD*	21	29	-1.31071	3534.83	10.3219	3.00077
VA08-2AN	487714	487881	168	ATGGTGACATTTATGTCACTACTTTTTTA	ATGACTAAGACCATTAACAATCGTAAAAACATGACTACTCAAGAACTTGAAACTGTATCAGGTGGAGTGGTTCCTTGGGCCGCTATTTCTGTTGGCATTGCTGCTGCAAAACTGACTTATGACCTTAGCTATGCTGCAGGTAAGTCTTTCTATAACCTCACCCACTAA	MTKTINNRKNMTTQELETVSGGVVPWAAISVGIAAAKLTYDLSYAAGKSFYNLTH*	MTKTINNRKNMTTQELETVSGG	VVPWAAISVGIAAAKLTYDLSYAAGKSFYNLTH*	22	34	0.587879	3496.84	9.03496	1.23835
VA08-2AN	487530	487694	165	ATGGTGACATTTATGTCACTACTTTTTTA	ATGACAATGATTAACAAAGAAATGAAGGCAGCTGACCTAGCCTCAGTAACAGGAGGCGGATGGAAGACTAACCTTGCCATTGGAGGGCTCTGCCTAGCTTCAGGACCTATTGGAACTATGGTATGCCTTGGAGCCTACAATGGCTACATGGACTCTGCGAGATAA	MTMINKEMKAADLASVTGGGWKTNLAIGGLCLASGPIGTMVCLGAYNGYMDSAR*	MTMINKEMKAADLASVTGG	GWKTNLAIGGLCLASGPIGTMVCLGAYNGYMDSAR*	19	36	0.417143	3559.71	8.21289	0.937738
VA08-2AN	487536	487694	159	ATGGTGACATTTATGTCACTACTTTTTTA	ATGATTAACAAAGAAATGAAGGCAGCTGACCTAGCCTCAGTAACAGGAGGCGGATGGAAGACTAACCTTGCCATTGGAGGGCTCTGCCTAGCTTCAGGACCTATTGGAACTATGGTATGCCTTGGAGCCTACAATGGCTACATGGACTCTGCGAGATAA	MINKEMKAADLASVTGGGWKTNLAIGGLCLASGPIGTMVCLGAYNGYMDSAR*	MINKEMKAADLASVTGG	GWKTNLAIGGLCLASGPIGTMVCLGAYNGYMDSAR*	17	36	0.417143	3559.71	8.21289	0.937738
YU10	1074128	1074298	171	TTAGTGACATGAATGTCACTATTTTTTTC	ATGTTAGAAATAAATATGATTTATTCTGATTTATCACTTACTGAACTTGCTCAAATTAATGGGGGAGGAATTCTGTCAAGTGTAGCTGGACTTGTTAAAGATACCTGGGGAACGTTATATTCTACAGGAAGAGACTTTGGACGTAGCGTTGTTAACGCTGCTATGCCTTAA	MLEINMIYSDLSLTELAQINGGGILSSVAGLVKDTWGTLYSTGRDFGRSVVNAAMP*	MLEINMIYSDLSLTELAQINGG	GILSSVAGLVKDTWGTLYSTGRDFGRSVVNAAMP*	22	35	0.244118	3524.81	9.2964	1.00063
YU10	1074310	1074480	171	TTAGTGACATGAATGTCACTATTTTTTTC	ATGTATAGAGAAAAGAGAAATGATGAAGAACTGAATATTAATGATCTTGCCATGATTAATGGTGGAGTAGCCCCTGTAGTTATTGCTGTAGGGGTAGTTGCGACACCATTCGTACTGGGCGCGATTGCTGGAGGCGCAGATGAGTACGCAAGAAAGAGAGGGCATCACTGA	MYREKRNDEELNINDLAMINGGVAPVVIAVGVVATPFVLGAIAGGADEYARKRGHH*	MYREKRNDEELNINDLAMINGG	VAPVVIAVGVVATPFVLGAIAGGADEYARKRGHH*	22	35	0.708824	3396.88	9.30118	1.4816
YU10	1074143	1074298	156	TTAGTGACATGAATGTCACTATTTTTTTC	ATGATTTATTCTGATTTATCACTTACTGAACTTGCTCAAATTAATGGGGGAGGAATTCTGTCAAGTGTAGCTGGACTTGTTAAAGATACCTGGGGAACGTTATATTCTACAGGAAGAGACTTTGGACGTAGCGTTGTTAACGCTGCTATGCCTTAA	MIYSDLSLTELAQINGGGILSSVAGLVKDTWGTLYSTGRDFGRSVVNAAMP*	MIYSDLSLTELAQINGG	GILSSVAGLVKDTWGTLYSTGRDFGRSVVNAAMP*	17	35	0.244118	3524.81	9.2964	1.00063
YU10	1435002	1435169	168	ATGGTGACATTTATGTCACTACTTTTTTA	ATGACTAAGACCATTAACAATCGTAAAAACATGACTACTCAAGAACTTGAAGCTGTATCAGGTGGAGTGGTTCCTTGGGCCGCTATTTCTGTTGGCATTGCTGCTGCAAAACTGACTTATGACCTTAGCTATGCTGCAGGTAAGTCTTTCTATAACCTCACCCACTAA	MTKTINNRKNMTTQELEAVSGGVVPWAAISVGIAAAKLTYDLSYAAGKSFYNLTH*	MTKTINNRKNMTTQELEAVSGG	VVPWAAISVGIAAAKLTYDLSYAAGKSFYNLTH*	22	34	0.587879	3496.84	9.03496	1.23835
YU10	1434818	1434982	165	ATGGTGACATTTATGTCACTACTTTTTTA	ATGACAATGATTAATAAAGAAATGAAGGCAGCTGACCTAGCCTCAGTAACAGGAGGCGGATGGAAGACTAACCTTGCCATTGGAGGGCTCTGCCTAGCTTCAGGACCTATTGGAACTATGATGTGCCTTGGAGCCTACAATGGCTACATGGACTCTGCGCGATAA	MTMINKEMKAADLASVTGGGWKTNLAIGGLCLASGPIGTMMCLGAYNGYMDSAR*	MTMINKEMKAADLASVTGG	GWKTNLAIGGLCLASGPIGTMMCLGAYNGYMDSAR*	19	36	0.351429	3591.68	8.21289	0.937738
YU10	1434824	1434982	159	ATGGTGACATTTATGTCACTACTTTTTTA	ATGATTAATAAAGAAATGAAGGCAGCTGACCTAGCCTCAGTAACAGGAGGCGGATGGAAGACTAACCTTGCCATTGGAGGGCTCTGCCTAGCTTCAGGACCTATTGGAACTATGATGTGCCTTGGAGCCTACAATGGCTACATGGACTCTGCGCGATAA	MINKEMKAADLASVTGGGWKTNLAIGGLCLASGPIGTMMCLGAYNGYMDSAR*	MINKEMKAADLASVTGG	GWKTNLAIGGLCLASGPIGTMMCLGAYNGYMDSAR*	17	36	0.351429	3591.68	8.21289	0.937738
YU10	2224532	2224690	159	GTAGTGACATTTATGTCACTATTTTTTTG	ATGTATATGGATACAATGATGATGGATAAATTTGATTCTTTAACCTTTGATAAGCTTTCTGAAATTGTTGGGGGAAATGTAGCATATGACATTGGTTATGGAGTTGGACAAGTAAGTTATATTGCAGTTGAGATTTTAAAACTTAGAAAAATAAGATAG	MYMDTMMMDKFDSLTFDKLSEIVGGNVAYDIGYGVGQVSYIAVEILKLRKIR*	MYMDTMMMDKFDSLTFDKLSEIVGG	NVAYDIGYGVGQVSYIAVEILKLRKIR*	25	28	0.344444	3036.71	9.73602	1.99935
YU10	2224538	2224690	153	GTAGTGACATTTATGTCACTATTTTTTTG	ATGGATACAATGATGATGGATAAATTTGATTCTTTAACCTTTGATAAGCTTTCTGAAATTGTTGGGGGAAATGTAGCATATGACATTGGTTATGGAGTTGGACAAGTAAGTTATATTGCAGTTGAGATTTTAAAACTTAGAAAAATAAGATAG	MDTMMMDKFDSLTFDKLSEIVGGNVAYDIGYGVGQVSYIAVEILKLRKIR*	MDTMMMDKFDSLTFDKLSEIVGG	NVAYDIGYGVGQVSYIAVEILKLRKIR*	23	28	0.344444	3036.71	9.73602	1.99935
YU10	2224376	2224525	150	GTAGTGACATTTATGTCACTATTTTTTTG	ATGAAAAATACATTTCAAAAAATTGATATTAAAGATTTAGCAATTGTAGTTGGTGGAAGTATTTACTCATCTGTAGGATATGGAGTCGGAGTAGTTACTCACACGGTTTATGATTTTGGTCGTGGATTTGTAGATGGATTTAGAGGTTAA	MKNTFQKIDIKDLAIVVGGSIYSSVGYGVGVVTHTVYDFGRGFVDGFRG*	MKNTFQKIDIKDLAIVVGG	SIYSSVGYGVGVVTHTVYDFGRGFVDGFRG*	19	31	0.28	3197.56	7.52846	0.239453
YU10	2224547	2224690	144	GTAGTGACATTTATGTCACTATTTTTTTG	ATGATGATGGATAAATTTGATTCTTTAACCTTTGATAAGCTTTCTGAAATTGTTGGGGGAAATGTAGCATATGACATTGGTTATGGAGTTGGACAAGTAAGTTATATTGCAGTTGAGATTTTAAAACTTAGAAAAATAAGATAG	MMMDKFDSLTFDKLSEIVGGNVAYDIGYGVGQVSYIAVEILKLRKIR*	MMMDKFDSLTFDKLSEIVGG	NVAYDIGYGVGQVSYIAVEILKLRKIR*	20	28	0.344444	3036.71	9.73602	1.99935
YU10	2224550	2224690	141	GTAGTGACATTTATGTCACTATTTTTTTG	ATGATGGATAAATTTGATTCTTTAACCTTTGATAAGCTTTCTGAAATTGTTGGGGGAAATGTAGCATATGACATTGGTTATGGAGTTGGACAAGTAAGTTATATTGCAGTTGAGATTTTAAAACTTAGAAAAATAAGATAG	MMDKFDSLTFDKLSEIVGGNVAYDIGYGVGQVSYIAVEILKLRKIR*	MMDKFDSLTFDKLSEIVGG	NVAYDIGYGVGQVSYIAVEILKLRKIR*	19	28	0.344444	3036.71	9.73602	1.99935
YU10	2224553	2224690	138	GTAGTGACATTTATGTCACTATTTTTTTG	ATGGATAAATTTGATTCTTTAACCTTTGATAAGCTTTCTGAAATTGTTGGGGGAAATGTAGCATATGACATTGGTTATGGAGTTGGACAAGTAAGTTATATTGCAGTTGAGATTTTAAAACTTAGAAAAATAAGATAG	MDKFDSLTFDKLSEIVGGNVAYDIGYGVGQVSYIAVEILKLRKIR*	MDKFDSLTFDKLSEIVGG	NVAYDIGYGVGQVSYIAVEILKLRKIR*	18	28	0.344444	3036.71	9.73602	1.99935
YU10	2224532	2224690	159	ATAGTGACATTTATGTCACTATTTTTTAT	ATGTATATGGATACAATGATGATGGATAAATTTGATTCTTTAACCTTTGATAAGCTTTCTGAAATTGTTGGGGGAAATGTAGCATATGACATTGGTTATGGAGTTGGACAAGTAAGTTATATTGCAGTTGAGATTTTAAAACTTAGAAAAATAAGATAG	MYMDTMMMDKFDSLTFDKLSEIVGGNVAYDIGYGVGQVSYIAVEILKLRKIR*	MYMDTMMMDKFDSLTFDKLSEIVGG	NVAYDIGYGVGQVSYIAVEILKLRKIR*	25	28	0.344444	3036.71	9.73602	1.99935
YU10	2224538	2224690	153	ATAGTGACATTTATGTCACTATTTTTTAT	ATGGATACAATGATGATGGATAAATTTGATTCTTTAACCTTTGATAAGCTTTCTGAAATTGTTGGGGGAAATGTAGCATATGACATTGGTTATGGAGTTGGACAAGTAAGTTATATTGCAGTTGAGATTTTAAAACTTAGAAAAATAAGATAG	MDTMMMDKFDSLTFDKLSEIVGGNVAYDIGYGVGQVSYIAVEILKLRKIR*	MDTMMMDKFDSLTFDKLSEIVGG	NVAYDIGYGVGQVSYIAVEILKLRKIR*	23	28	0.344444	3036.71	9.73602	1.99935
YU10	2224376	2224525	150	ATAGTGACATTTATGTCACTATTTTTTAT	ATGAAAAATACATTTCAAAAAATTGATATTAAAGATTTAGCAATTGTAGTTGGTGGAAGTATTTACTCATCTGTAGGATATGGAGTCGGAGTAGTTACTCACACGGTTTATGATTTTGGTCGTGGATTTGTAGATGGATTTAGAGGTTAA	MKNTFQKIDIKDLAIVVGGSIYSSVGYGVGVVTHTVYDFGRGFVDGFRG*	MKNTFQKIDIKDLAIVVGG	SIYSSVGYGVGVVTHTVYDFGRGFVDGFRG*	19	31	0.28	3197.56	7.52846	0.239453
YU10	2224547	2224690	144	ATAGTGACATTTATGTCACTATTTTTTAT	ATGATGATGGATAAATTTGATTCTTTAACCTTTGATAAGCTTTCTGAAATTGTTGGGGGAAATGTAGCATATGACATTGGTTATGGAGTTGGACAAGTAAGTTATATTGCAGTTGAGATTTTAAAACTTAGAAAAATAAGATAG	MMMDKFDSLTFDKLSEIVGGNVAYDIGYGVGQVSYIAVEILKLRKIR*	MMMDKFDSLTFDKLSEIVGG	NVAYDIGYGVGQVSYIAVEILKLRKIR*	20	28	0.344444	3036.71	9.73602	1.99935
YU10	2224550	2224690	141	ATAGTGACATTTATGTCACTATTTTTTAT	ATGATGGATAAATTTGATTCTTTAACCTTTGATAAGCTTTCTGAAATTGTTGGGGGAAATGTAGCATATGACATTGGTTATGGAGTTGGACAAGTAAGTTATATTGCAGTTGAGATTTTAAAACTTAGAAAAATAAGATAG	MMDKFDSLTFDKLSEIVGGNVAYDIGYGVGQVSYIAVEILKLRKIR*	MMDKFDSLTFDKLSEIVGG	NVAYDIGYGVGQVSYIAVEILKLRKIR*	19	28	0.344444	3036.71	9.73602	1.99935
YU10	2224553	2224690	138	ATAGTGACATTTATGTCACTATTTTTTAT	ATGGATAAATTTGATTCTTTAACCTTTGATAAGCTTTCTGAAATTGTTGGGGGAAATGTAGCATATGACATTGGTTATGGAGTTGGACAAGTAAGTTATATTGCAGTTGAGATTTTAAAACTTAGAAAAATAAGATAG	MDKFDSLTFDKLSEIVGGNVAYDIGYGVGQVSYIAVEILKLRKIR*	MDKFDSLTFDKLSEIVGG	NVAYDIGYGVGQVSYIAVEILKLRKIR*	18	28	0.344444	3036.71	9.73602	1.99935
YU10	2289101	2289337	237	GTGGTGACATTAATGTCACTACTTTTTTA	ATGACAACAAAAATCATTAACAATTTTAACTCACTTAATTCCGAAGATCTTTCTATTATTGCAGGTGGGGATGTGATTGGTTGTGTAGCTGGGACCGCTGGATCTGCTGGACTTGGATTTTTGACTGGAACATCAGTTGGAACTGTTGCATTTCCAATTGTTGGGACTGTTTCAGGTGGAGCATTTGGGGCATGGTCAGGAGCCGGCCTTGGAATGGCTACATTTTGCGGAGTTTAG	MTTKIINNFNSLNSEDLSIIAGGDVIGCVAGTAGSAGLGFLTGTSVGTVAFPIVGTVSGGAFGAWSGAGLGMATFCGV*	MTTKIINNFNSLNSEDLSIIAGG	DVIGCVAGTAGSAGLGFLTGTSVGTVAFPIVGTVSGGAFGAWSGAGLGMATFCGV*	23	56	1.14364	4978.43	3.74997	-1.06051
YU10	2297727	2297906	180	GTGGTGACATACATGTCACTACTTTTTTG	ATGACAACACAAACAATGAACAATTTTGAAACACTCGATCTCGAGGCACTTGCAAACGTTGAAGGTGGTGGATGGGTTAAGTGTTATGCCGGCACAATCGGATCTGCTCTAGTAGGATCAGCAGGAGGCCCAGTAGGTTACTGGGGAGGAGCTTTAGTTGGTTATGCCACATTCTGCTAA	MTTQTMNNFETLDLEALANVEGGGWVKCYAGTIGSALVGSAGGPVGYWGGALVGYATFC*	MTTQTMNNFETLDLEALANVEGG	GWVKCYAGTIGSALVGSAGGPVGYWGGALVGYATFC*	23	37	0.763889	3494.68	8.2049	0.936154
YU10	2297742	2297906	165	GTGGTGACATACATGTCACTACTTTTTTG	ATGAACAATTTTGAAACACTCGATCTCGAGGCACTTGCAAACGTTGAAGGTGGTGGATGGGTTAAGTGTTATGCCGGCACAATCGGATCTGCTCTAGTAGGATCAGCAGGAGGCCCAGTAGGTTACTGGGGAGGAGCTTTAGTTGGTTATGCCACATTCTGCTAA	MNNFETLDLEALANVEGGGWVKCYAGTIGSALVGSAGGPVGYWGGALVGYATFC*	MNNFETLDLEALANVEGG	GWVKCYAGTIGSALVGSAGGPVGYWGGALVGYATFC*	18	37	0.763889	3494.68	8.2049	0.936154

## Sheet: Treated data
Seqnames	MATUREseq	Name
1001175st1_H3	RVNWERWGMCGASVAVGATIGGGVALLGC*	BlpE
ATCC 7073	RVNWERWGMCGASVAVGATIGGGVALLGC*	BlpE
BCC42	RVNWERWGMCGASVAVGAAIGGGVALLGC*	BlpE
bf_0095	RVNWERWGMCGASVAVGATIGGGVALLGC*	BlpE
BIOML-A10	RVNWERWGMCGASVAVGATIGGGVALLGC*	BlpE
BIOML-A7	RVNWERWGMCGASVAVGATIGGGVALLGC*	BlpE
JF	RVNWERWGMCGASVAVGATIGGGVALLGC*	BlpE
JIM8777	RVNWERWGMCGASVAVGATIGGGVALLGC*	BlpE
NCTC8618	RVNWERWGMCGASVAVGATIGGGVALLGC*	BlpE
Ssal L22	RVNWERWGMCGASVAVGATIGGGVALLGC*	BlpE
Ssal L25	RVNWERWGMCGASVAVGATIGGGVALLGC*	BlpE
Ssal L45	RVNWERWGMCGASVAVGATIGGGVALLGC*	BlpE
ICDC1	AVCRMPNVNSKEGDPLKDGWVSPPKYRSGEAYPMVYIPICAIM*	BlpF
ICDC3	AVCRMPNVNSKEGDPLKDGWVSPPKYRSGEAYPMVYIPICAIM*	BlpF
PS4	VSCIMPRTNNKAGGSYDPFIDGRVSPPRYRSGEAYPMVYLPICVLM*	BlpF
1001175st1_H3	GCSWGGFAKQGVATGVGNGLRLGIKTRTWQGAVAGAAGGAIVGGVGYGATCWW*	BlpK
37-08 S12	GCSWGGFAKQGVATGVGNGLRLGIKTRTWQGAVAGAAGGAIVGGVGYGATCWW*	BlpK
57.I	GCSWGGFAKQGVATGVGNGLRLGIKTRTWQGAVAGAAGGAIVGGVGYGATCWW*	BlpK
AF10-23	GCSWGGFAKQGVATGVGNGLRLGIKTRTWQGAVAGAAGGAIVGGVGYGATCWW*	BlpK
AF29-16	GCSWGGFAKQGVATGVGNGLRLGIKTRTWQGAVAGAAGGAIVGGVGYGATCWW*	BlpK
ATCC 7073	GCSWGGFAKQGVATGVGNGLRLGIKTRTWQGAVAGAAGGAIVGGVGYGATCWW*	BlpK
BCC42	GCSWGGFAKQGVATGVGNGLRLGIKTRTWQGAVAGAAGGAIVGGVGYGATCWW*	BlpK
bf_0095	GCSWGGFAKQGVATGVGNGLRLGIKTRTWQGAVAGAAGGAIVGGVGYGATCWW*	BlpK
BIOML-A10	GCSWGGFAKQGVATGVGNGLRLGIKTRTWQGAVAGAAGGAIVGGVGYGATCWW*	BlpK
BIOML-A7	GCSWGGFAKQGVATGVGNGLRLGIKTRTWQGAVAGAAGGAIVGGVGYGATCWW*	BlpK
CCHSS3	GCSWGGFAKQGVATGVGNGLRLGIKTRTWQGAVAGAAGGAIVGGVGYGATCWW*	BlpK
DB-B5	GCSWGGFAKQGVATGVGNGLRLGIKTRTWQGAVAGAAGGAIVGGVGYGATCWW*	BlpK
DE0578	GCSWGGFAKQGVATGVGNGLRLGIKTRTWQGAVAGAAGGAIVGGVGYGATCWW*	BlpK
HSISS4	GCSWGGFAKQGVATGVGNGLRLGIKTRTWQGAVAGAAGGAIVGGVGYGATCWW*	BlpK
JF	GCSWGGFAKQGVATGVGNGLRLGIKTRTWQGAVAGAAGGAIVGGVGYGATCWW*	BlpK
JIM8777	GCSWGGFAKQGVATGVGNGLRLGIKTRTWQGAVAGAAGGAIVGGVGYGATCWW*	BlpK
KB005	GCSWGGFAKQGVATGVGNGLRLGIKTRTWQGAVAGAAGGAIVGGVGYGATCWW*	BlpK
LAB813	GCSWGGFAKQGVATGVGNGLRLGIKTRTWQGAVAGAAGGAIVGGVGYGATCWW*	BlpK
MGYG-HGUT-00113	GCSWGGFAKQGVATGVGNGLRLGIKTRTWQGAVAGAAGGAIVGGVGYGATCWW*	BlpK
NCTC8618	GCSWGGFAKQGVATGVGNGLRLGIKTRTWQGAVAGAAGGAIVGGVGYGATCWW*	BlpK
SALI-10	GCSWGGFAKQGVATGVGNGLRLGIKTRTWQGAVAGAAGGAIVGGVGYGATCWW*	BlpK
Ssal B63	GCSWGGFAKQGVATGVGNGLRLGIKTRTWQGAVAGAAGGAIVGGVGYGATCWW*	BlpK
Ssal L22	GCSWGGFAKQGVATGVGNGLRLGIKTRTWQGAVAGAAGGAIVGGVGYGATCWW*	BlpK
Ssal L25	GCSWGGFAKQGVATGVGNGLRLGIKTRTWQGAVAGAAGGAIVGGVGYGATCWW*	BlpK
Ssal L45	GCSWGGFAKQGVATGVGNGLRLGIKTRTWQGAVAGAAGGAIVGGVGYGATCWW*	BlpK
UC3162	GCSWGGFAKQGVATGVGNGLRLGIKTRTWQGAVAGAAGGAIVGGVGYGATCWW*	BlpK
39-09 S16	GIMSSVAGLVKDTWGTLYSTGRDFGRSVVNAAMP*	PsnA
84-12 S20	GIMSSVAGLVKDTWGTLYSTGRDFGRSVVNAAMP*	PsnA
ATCC 27945	GILSSVAGLVKDTWGTLYSTGRDFGRSVVNAAMP*	PsnA
BIOML-A1	GILSSVAGLVKDTWGTLYSTGRDFGRSVVNAAMP*	PsnA
BIOML-A2	GILSSVAGLVKDTWGTLYSTGRDFGRSVVNAAMP*	PsnA
BIOML-A8	GIMSSVAGLVKDTWGTLYSTGRDFGRSVVNAAMP*	PsnA
FDAARGOS_771	GILSSVAGLVKDTWGTLYSTGRDFGRSVVNAAMP*	PsnA
NU10	GILSSVAGLVKDTWGTLYSTGRDFGRSVVNAAMP*	PsnA
Ssal N20	GILSSVAGLVKDTWGTLYSTGRDFGRSVVNAAMP*	PsnA
UBSS01	GIMSSVAGLVKDTWGTLYSTGRDFGRSVVNAAMP*	PsnA
YU10	GILSSVAGLVKDTWGTLYSTGRDFGRSVVNAAMP*	PsnA
39-09 S16	VAPVVIAVGVIATPFVLGAIAGGADEYARKRGHH*	PsnB
84-12 S20	VAPVVIAVGVIATPFVLGAIAGGADEYARKRGHH*	PsnB
ATCC 27945	VAPVVIAVGVVATPFVLGAIAGGADEYARKRGHH*	PsnB
BIOML-A1	VAPVVIAVGVVATPFVLGAIAGGADEYARKRGHH*	PsnB
BIOML-A2	VAPVVIAVGVVATPFVLGAIAGGADEYARKRGHH*	PsnB
BIOML-A8	VAPVVIAVGVIATPFVLGAIAGGADEYARKRGHH*	PsnB
FDAARGOS_771	VAPVVIAVGVVATPFVLGAIAGGADEYARKRGHH*	PsnB
NU10	VAPVVIAVGVVATPFVLGAIAGGADEYARKRGHH*	PsnB
Ssal N20	VAPVVIAVGVVATPFVLGAIAGGADEYARKRGHH*	PsnB
UBSS01	VAPVVIAVGVIATPFVLGAIAGGADEYARKRGHH*	PsnB
YU10	VAPVVIAVGVVATPFVLGAIAGGADEYARKRGHH*	PsnB
20-12 S2	NRCKDLIFGGALTGAGAGFTGGMAAFGVTAFPGAFVGAHVGAVAGGLACIGASF*	PsnC
726_SSAL	NRCKDLIFGGALTGAGAGFTGGMAAFGVTAFPGAFVGAHVGAVAGGLACIGASF*	PsnC
ATCC 25975	NRCKDLIFGGALTGAGAGFTGGMAAFGVTAFPGAFVGAHVGAVAGGLACIGASF*	PsnC
ATCC 27945	NRCKDLIFGGALTGAGAGFTGGMAAFGVTAFPGAFVGAHVGAVAGGLACIGASF*	PsnC
BIOML-A20	NRCKDLIFGGALTGAGAGFTGGMAAFGVTAFPGAFVGAHVGAVAGGLACIGASF*	PsnC
BIOML-A3	NRCKDLIFGGALTGAGAGFTGGMAAFGVTAFPGAFVGAHVGAVAGGLACIGASF*	PsnC
BIOML-A4	NRCKDLIFGGALTGAGAGFTGGMAAFGVTAFPGAFVGAHVGAVAGGLACIGASF*	PsnC
BIOML-A5	NRCKDLIFGGALTGAGAGFTGGMAAFGVTAFPGAFVGAHVGAVAGGLACIGASF*	PsnC
MIT 14-1770-C1	NRCKDLIFGGALTGAGAGFTGGMVAFGVTAFPGAFVGAHVGAVAGGLACIGASF*	PsnC
NCTC7366	NRCKDLIFGGALTGAGAGFTGGMAAFGVTAFPGAFVGAHVGAVAGGLACIGASF*	PsnC
Ssal B50	NRCKDLIFGGALTGAGAGFTGGMAAFGVTAFPGAFVGAHVGAVAGGLACIGASF*	PsnC
Ssal L64	NRCKDLIFGGALTGAGAGFTGGMAAFGVTAFPGAFVGAHVGAVAGGLACIGASF*	PsnC
UMB0051	NRCKDLIFGGALTGAGAGFTGGMAAFGVTAFPGAFVGAHVGAVAGGLACIGASF*	PsnC
20-12 S2	GKVGAVIGGCLGGMLMAWAAGPVSAGGYTMICATSGLANAYF*	PsnD
726_SSAL	GKVGAVIGGCLGGMLMAWAAGPVSAGGYTMICATSGLANAYF*	PsnD
ATCC 25975	GKVGAVIGGCLGGMLMAWAAGPVSAGGYTMICATSGLANAYF*	PsnD
ATCC 27945	GKVGEVIGGCLGGMLMAWAAGPVSAGGYTMICATSGLANAYF*	PsnD
BIOML-A20	GKVGAVIGGCLGGMLMAWAAGPVSAGGYTMICATSGLANAYF*	PsnD
BIOML-A3	GKVGAVIGGCLGGMLMAWAAGPVSAGGYTMICATSGLANAYF*	PsnD
BIOML-A4	GKVGAVIGGCLGGMLMAWAAGPVSAGGYTMICATSGLANAYF*	PsnD
BIOML-A5	GKVGAVIGGCLGGMLMAWAAGPVSAGGYTMICATSGLANAYF*	PsnD
MIT 14-1770-C1	GKVGAVIGGCLGGMLMAWAAGPVSAGGYTMICATSGLANAYF*	PsnD
NCTC7366	GKVGAVIGGCLGGMLMAWAAGPVSAGGYTMICATSGLANAYF*	PsnD
Ssal B50	GKVGAVIGGCLGGMLMAWAAGPVSAGGYTMICATSGLANAYF*	PsnD
Ssal L64	GKVGAVIGGCLGGMLMAWAAGPVSAGGYTMICATSGLANAYF*	PsnD
UMB0051	GKVGAVIGGCLGGMLMAWAAGPVSAGGYTMICATSGLANAYF*	PsnD
140_SSAL	SIYSSVGYGVGVVTHTVYDFGRGFVDGFRG*	PsnE
22-08 S7	SIYSSVGYGVGVVTHTVYDFGRGFVDGFRG*	PsnE
37-09 S13	SIYSSVGYGVGVVTHTVYDFGRGFVDGFRG*	PsnE
39-01 S14	SIYSSVGYGVGVVTHTVYDFGRGFVDGFRG*	PsnE
40-02 S18	SIYSSVGYGVGVVTHTVYDFGRGFVDGFRG*	PsnE
BIOML-A6	SIYSSVGYGVGVVTHTVYDFGRGFVDGFRG*	PsnE
BIOML-A9	SIYSSVGYGVGVVTHTVYDFGRGFVDGFRG*	PsnE
DE0578	SIYSSVGYGVGVVTHTVYDFGRGFVDGFRG*	PsnE
NU10	SIYSSVGYGVGVVTHTVYDFGRGFVDGFRG*	PsnE
YU10	SIYSSVGYGVGVVTHTVYDFGRGFVDGFRG*	PsnE
140_SSAL	NVAYDIGYGVGQVSYIAVEILKLRKIR*	PsnF
22-08 S7	NVAYDIGYGVGQVSYIAVEILKLRKIR*	PsnF
37-09 S13	NVAYDIGYGVGQVSYIAVEILKLRKIR*	PsnF
39-01 S14	NVAYDIGYGVGQVSYIAVEILKLRKIR*	PsnF
40-02 S18	NVAYDIGYGVGQVSYIAVEILKLRKIR*	PsnF
BIOML-A6	NVAYDIGYGVGQVSYIAVEILKLRKIR*	PsnF
BIOML-A9	NVAYDIGYGVGQVSYIAVEILKLRKIR*	PsnF
DE0578	NVAYDIGYGVGQVSYIAVEILKLRKIR*	PsnF
NU10	NVAYDIGYGVGQVSYIAVEILKLRKIR*	PsnF
YU10	NVAYDIGYGVGQVSYIAVEILKLRKIR*	PsnF
140_SSAL	LAPIVIGGVVVGWKVIGGVAGVIAASGAAGIAAGYYANRP*	PsnG
57.I	LAPIVIGGVVVGWKVIGGVAGVIAASGAAGIAAGYYANRP*	PsnG
84-12 S20	LAPIVIGGVVVGWKVIGGVAGVIAASGAAGIAAGYYANRP*	PsnG
BIOML-A1	LAPIVIGGVVVGWKVIGGVAGVIAASGAAGIAAGYYANRP*	PsnG
BIOML-A2	LAPIVIGGVVVGWKVIGGVAGVIAASGAAGIAAGYYANRP*	PsnG
BIOML-A6	LAPIVIGGVVVGWKVIGGVAGVIAASGAAGIAAGYYANRP*	PsnG
BIOML-A8	LAPIVIGGVVVGWKVIGGVAGVIAASGAAGIAAGYYANRP*	PsnG
BIOML-A9	LAPIVIGGVVVGWKVIGGVAGVIAASGAAGIAAGYYANRP*	PsnG
CCHSS3	LAPIVIGGVVVGWKVIGGVAGVIAASGAAGIAAGYYANRP*	PsnG
F6-1	LAPIVIGGVVVGWKVIGGVAGVIAASGAAGIAAGYYANRP*	PsnG
FDAARGOS_771	LAPIVIGGVVVGWKVIGGVAGVIAASGAAGIAAGYYANRP*	PsnG
SALI-10	LAPIVIGGVVVGWKVIGGVAGVIAASGAAGIAAGYYANRP*	PsnG
UBSS01	LAPIVIGGVVVGWKVIGGVAGVIAASGAAGIAAGYYANRP*	PsnG
140_SSAL	VAPIMVAIGLGSLAVASFSSGYKFGTDLARRGR*	PsnH
57.I	VAPIMVAIGLGSLAVASFSSGYKFGTDLARRGR*	PsnH
84-12 S20	VAPIMVAIGLGSLAVASFSSGYKFGTDLARRGR*	PsnH
BIOML-A1	VAPIMVAIGLGSLAVASFSSGYKFGTDLARRGR*	PsnH
BIOML-A2	VAPIMVAIGLGSLAVASFSSGYKFGTDLARRGR*	PsnH
BIOML-A6	VAPIMVAIGLGSLAVASFSSGYKFGTDLARRGR*	PsnH
BIOML-A8	VAPIMVAIGLGSLAVASFSSGYKFGTDLARRGR*	PsnH
BIOML-A9	VAPIMVAIGLGSLAVASFSSGYKFGTDLARRGR*	PsnH
CCHSS3	VAPIMVAIGLGSLAVASFSSGYKFGTDLARRGR*	PsnH
F6-1	VAPIMVAIGLGSLAVASFSSGYKFGTDLARRGR*	PsnH
FDAARGOS_771	VAPIMVAIGLGSLAVASFSSGYKFGTDLARRGR*	PsnH
SALI-10	VAPIMVAIGLGSLAVASFSSGYKFGTDLARRGR*	PsnH
UBSS01	VAPIMVAIGLGSLAVASFSSGYKFGTDLARRGR*	PsnH
34-09 S8	GVIGCVAGTAGSAGLGFLTGTSVGTVTFPIVGTVSGGAFGAWSGAGLGMATFCGV*	PsnI
34-19 S9	GVIGCVAGTAGSAGLGFLTGTSVGTVTFPIVGTVSGGAFGAWSGAGLGMATFCGV*	PsnI
34-24 S10	GVIGCVAGTAGSAGLGFLTGTSVGTVTFPIVGTVSGGAFGAWSGAGLGMATFCGV*	PsnI
85-02 S21	GVIGCVAGTAESAGLGFLTGTSVGTVTFPIVGTVSGGAFGAWSGAGLGMATFCGV*	PsnI
85-04 S22	GVIGCVAGTAESAGLGFLTGTSVGTVTFPIVGTVSGGAFGAWSGAGLGMATFCGV*	PsnI
85-05 S23	GVIGCVAGTAESAGLGFLTGTSVGTVTFPIVGTVSGGAFGAWSGAGLGMATFCGV*	PsnI
85-06 S24	GVIGCVAGTAESAGLGFLTGTSVGTVTFPIVGTVSGGAFGAWSGAGLGMATFCGV*	PsnI
ATCC 25975	GVIGCVAGTAGSAGLGFLTGTSVGTVTFPIVGTVSGGAFGAWSGAGLGMATFCGV*	PsnI
BIOML-A1	GVIGCVAGTAGSAGLGFLTGTSVGTVTFPIVGTVSGGAFGAWSGAGLGMATFCGV*	PsnI
BIOML-A2	GVIGCVAGTAGSAGLGFLTGTSVGTVTFPIVGTVSGGAFGAWSGAGLGMATFCGV*	PsnI
KB005	GVIGCVAGTAGSAGLGFLTGTSVGTVTFPIVGTVSGGAFGAWSGAGLGMATFCGV*	PsnI
M18	GVIGCVAGTAGSAGLGFLTGTSVGTVTFPIVGTVSGGAFGAWSGAGLGMATFCGV*	PsnI
NCTC7366	GVIGCVAGTAGSAGLGFLTGTSVGTVTFPIVGTVSGGAFGAWSGAGLGMATFCGV*	PsnI
NU10	DVIGCVAGTAGSAGLGFLTGTSVGTVAFPIVGTVSGGAFGAWSGAGLGMATFCGV*	PsnI
UBSS01	GVIGCVAVTAGSAGLGFLTGTSVGTVTFPIVGTVSGGVFGAWSGAGLGMATFCGV*	PsnI
YU10	DVIGCVAGTAGSAGLGFLTGTSVGTVAFPIVGTVSGGAFGAWSGAGLGMATFCGV*	PsnI
34-09 S8	KVNWDRLSSSASGAAEGIYFCAASGAPLFTLAPYAIVGCGVVGAGLGYAFPH*	PsnJ
34-19 S9	KVNWDRLSSSASGAAEGIYFCAASGAPLFTLAPYAIVGCGVVGAGLGYAFPH*	PsnJ
34-24 S10	KVNWDRLSSSASGAAEGIYFCAASGAPLFTLAPYAIVGCGVVGAGLGYAFPH*	PsnJ
85-02 S21	KVNWDRLSSSASGAAEGIYFCAASGAPLFTLAPYAIVGCGVVGAGLGYAFPH*	PsnJ
85-04 S22	KVNWDRLSSSASGAAEGIYFCAASGAPLFTLAPYAIVGCGVVGAGLGYAFPH*	PsnJ
85-05 S23	KVNWDRLSSSASGAAEGIYFCAASGAPLFTLAPYAIVGCGVVGAGLGYAFPH*	PsnJ
85-06 S24	KVNWDRLSSSASGAAEGIYFCAASGAPLFTLAPYAIVGCGVVGAGLGYAFPH*	PsnJ
BIOML-A1	KVNWDRLSSSASGAAEGIYFCAASGAPLFTLAPYAIVGCGVVGAGLGYAFPH*	PsnJ
BIOML-A2	KVNWDRLSSSASGAAEGIYFCAASGAPLFTLAPYAIVGCGVVGAGLGYAFPH*	PsnJ
FDAARGOS_1045	KVNWDRLSSSASGAAEGIYFCAASGAPLFTLAPYAIVGCGVVGAGLGYAFPH*	PsnJ
FDAARGOS_771	KVNWDRLSSSASGAAEGIYFCAASGAPLFTLAPYAIVGCGVVGAGLGYAFPH*	PsnJ
HS0302	KVNWDRLSSSASGAAEGIYFCAASGAPLFTLAPYAIVGCGVVGAGLGYAFPH*	PsnJ
ICDC2	KVNWDRLSSSASGAAEGIYFCAASGAPLFTLAPYAIVGCGVVGAGLGYAFPH*	PsnJ
ICDC1	KVIYYGNGLYCKSNGGCWVDWSQTINSILTNSAMNWATRGNAGWHSGGIAP*	PsnK
ICDC3	KVIYYGNGLYCKSNGGCWVDWSQTINSILTNSAMNWATRGNAGWHSGGIAP*	PsnK
1003_SOLI	GWVKCYAGTIGSALVGSAGGPVGYWGGALVGYATFC*	PsnL
1270_SSAL	GWVKCYAGTIGSALVGSAGGPVGYWGGALVGYATFC*	PsnL
140_SSAL	GWVKCYAGTIGSALVGSAGGPVGYWGGALVGYATFC*	PsnL
22-08 S7	GWVKCYAGTIGSALVGSAGGPVGYWGGALVGYATFC*	PsnL
37-09 S13	GWVKCYAGTIGSALVGSAGGPVGYWGGALVGYATFC*	PsnL
39-01 S14	GWVKCYAGTIGSALVGSAGGPVGYWGGALVGYATFC*	PsnL
39-07 S15	GWVKCYAGTIGSALVGSAGGPVGYWGGALVGYATFC*	PsnL
39-09 S16	GWVKCYAGTIGSALVGSAGGPVGYWGGALVGYATFC*	PsnL
40-02 S18	GWVKCYAGTIGSALVGSAGGPVGYWGGALVGYATFC*	PsnL
726_SSAL	GWVKCYAGTIGSALVGSAGGPVGYWGGALVGYATFC*	PsnL
84-12 S20	GWVKCYAGTIGSALVGSAGGPVGYWGGALVGYATFC*	PsnL
AF23-9AC	GWVKCYAGTIGSALVGSAGGPVGYWGGALVGYATFC*	PsnL
ATCC 25975	GWVKCYAGTIGSALVGSAGGPVGYWGGALVGYATFC*	PsnL
BIOML-A13	GWVKCYAGTIGSALVGSAGGPVGYWGGALVGYATFC*	PsnL
BIOML-A17	GWVKCYAGTIGSALVGSAGGPVGYWGGALVGYATFC*	PsnL
BIOML-A18	GWVKCYAGTIGSALVGSAGGPVGYWGGALVGYATFC*	PsnL
BIOML-A19	GWVKCYAGTIGSALVGSAGGPVGYWGGALVGYATFC*	PsnL
BIOML-A21	GWVKCYAGTIGSALVGSAGGPVGYWGGALVGYATFC*	PsnL
BIOML-A22	GWVKCYAGTIGSALVGSAGGPVGYWGGALVGYATFC*	PsnL
BIOML-A23	GWVKCYAGTIGSALVGSAGGPVGYWGGALVGYATFC*	PsnL
BIOML-A24	GWVKCYAGTIGSALVGSAGGPVGYWGGALVGYATFC*	PsnL
BIOML-A25	GWVKCYAGTIGSALVGSAGGPVGYWGGALVGYATFC*	PsnL
BIOML-A26	GWVKCYAGTIGSALVGSAGGPVGYWGGALVGYATFC*	PsnL
BIOML-A27	GWVKCYAGTIGSALVGSAGGPVGYWGGALVGYATFC*	PsnL
BIOML-A28	GWVKCYAGTIGSALVGSAGGPVGYWGGALVGYATFC*	PsnL
BIOML-A30	GWVKCYAGTIGSALVGSAGGPVGYWGGALVGYATFC*	PsnL
BIOML-A31	GWVKCYAGTIGSALVGSAGGPVGYWGGALVGYATFC*	PsnL
BIOML-A32	GWVKCYAGTIGSALVGSAGGPVGYWGGALVGYATFC*	PsnL
BIOML-A33	GWVKCYAGTIGSALVGSAGGPVGYWGGALVGYATFC*	PsnL
BIOML-A34	GWVKCYAGTIGSALVGSAGGPVGYWGGALVGYATFC*	PsnL
BIOML-A35	GWVKCYAGTIGSALVGSAGGPVGYWGGALVGYATFC*	PsnL
BIOML-A6	GWVKCYAGTIGSALVGSAGGPVGYWGGALVGYATFC*	PsnL
BIOML-A8	GWVKCYAGTIGSALVGSAGGPVGYWGGALVGYATFC*	PsnL
BIOML-A9	GWVKCYAGTIGSALVGSAGGPVGYWGGALVGYATFC*	PsnL
F6-1	GWVKCYAGTIGSALVGSAGGPVGYWGGALVGYATFC*	PsnL
FDAARGOS_259	GWVKCYAGTIGSALVGSAGGPVGYWGGALVGYATFC*	PsnL
ICDC1	GWVKCYAGTIGSALVGSAGGPVGYWGGALVGYATFC*	PsnL
ICDC3	GWVKCYAGTIGSALVGSAGGPVGYWGGALVGYATFC*	PsnL
K12	GWVKCYAGTIGSALVGSAGGPVGYWGGALVGYATFC*	PsnL
M18	GWVKCYAGTIGSALVGSAGGPVGYWGGALVGYATFC*	PsnL
NCTC7366	GWVKCYAGTIGSALVGSAGGPVGYWGGALVGYATFC*	PsnL
NU10	GWVKCYAGTIGSALVGSAGGPVGYWGGALVGYATFC*	PsnL
PS4	GWVKCYAGTIGSALVGSAGGPVGYWGGALVGYATFC*	PsnL
Ssal B57	GWVKCYAGTIGSALVGSAGGPVGYWGGALVGYATFC*	PsnL
Ssal L61	GWVKCYAGTIGSALVGSAGGPVGYWGGALVGYATFC*	PsnL
Ssal N20	GWVKCYAGTIGSALVGSAGGPVGYWGGALVGYATFC*	PsnL
Ssal N5	GWVKCYAGTIGSALVGSAGGPVGYWGGALVGYATFC*	PsnL
UBSS01	GWVKCYAGTIGSALVGSAGGPVGYWGGALVGYATFC*	PsnL
VA08-2AN	GWVKCYAGTIGSALVGSAGGPVGYWGGALVGYATFC*	PsnL
YU10	GWVKCYAGTIGSALVGSAGGPVGYWGGALVGYATFC*	PsnL
PS4	GCSWRGAGGATVQGAIGGAFGGNVVLPVVGSVPGYLAGGVLGGAGGAVAYGATCWWS*	PsnM
1001175st1_H3	ACSFWGATAAVGVGAVGGAIKGGIQTGTWQGAALKGIGYGIKGGITYGLTCRY*	SlvV
1003_SOLI	ACSFWGATAAVGVGAVGGAIKGGIQTGTWQGAALKGIGYGIKDGITYGLICRY*	SlvV
1270_SSAL	ACSFWGATAAVGVGAVGGAIKGGIQTGTWQGAALKGIGYGIKDGITYGLICRY*	SlvV
140_SSAL	ACSFWGATAAVGVGAVGGAVKGGIQTGTWQGAALKGIGYGIKGGITYGLTCRY*	SlvV
22-08 S7	ACSFWGATAAVGVGAVGGAIKGGIQTGTWQGAALKGIGYGIKDGITYGLICRY*	SlvV
37-08 S12	ACSFWGATAAVGVGAVGGAIKGGIQTGTWQGAALKGIGYGIKDGITYGLICRY*	SlvV
37-09 S13	ACSFWGATAAVGVGAVGGAIKGGIQTGTWQGAALKGIGYGIKDGITYGLICRY*	SlvV
39-07 S15	ACSFWGATAAVGVGAVGGAIKGGIQTGTWQGAALKGIGYGIKDGITYGLICRY*	SlvV
39-09 S16	ACSFWGATAAVGVGAVGGAIKGGIQTGTWQGAALKGIGYGIKDGITYGLICRY*	SlvV
40-02 S18	ACSFWGATAAVGVGAVGGAIKGGIQTGTWQGAALKGIGYGIKDGITYGLICRY*	SlvV
57.I	ACSFWGATAAVGVGAVGGAIKGGIQTGTWQGAALKGIGYGIKGGITYGLTCRY*	SlvV
726_SSAL	ACSFWGATAAVGVGAVGGAIKGGIQTGTWQGAALKGIGYGIKDGITYGLICRY*	SlvV
AF10-23	ACSFWGATAAVGVGAVGGAIKGGIQTGTWQGAALKGIGYGIKGGITYGLTCRY*	SlvV
AF23-9AC	ACSFWGATAAVGVGAVGGAIKGGIQTGTWQGAALKGIGYGIKDGITYGLICRY*	SlvV
AF29-16	ACSFWGATAAVGVGAVGGAIKGGIQTGTWQGAALKGIGYGIKDGITYGLICRY*	SlvV
ATCC 7073	ACSFWGATAAVGVGAVGGAIKGGIQTGTWQGAALKGIGYGIKDGITYGLICRY*	SlvV
BCC42	ACSFWGATAAVGVGAVGGAIKGGIQTGTWQGAALKGIGYGIKDGITYGLICRY*	SlvV
bf_0095	ACSFWGATAAVGVGAVGGAIKGGIQTGTWQGAALKGIGYGIKDGITYGLICRY*	SlvV
BIOML-A10	ACSFWGATAAVGVGAVGGAIKGGIQTGTWQGAALKGIGYGIKDGITYGLICRY*	SlvV
BIOML-A13	ACSFWGATAAVGVGAVGGAIKGGIQTGTWQGAALKGIGYGIKDGITYGLICRY*	SlvV
BIOML-A17	ACSFWGATAAVGVGAVGGAIKGGIQTGTWQGAALKGIGYGIKDGITYGLICRY*	SlvV
BIOML-A18	ACSFWGATAAVGVGAVGGAIKGGIQTGTWQGAALKGIGYGIKDGITYGLICRY*	SlvV
BIOML-A19	ACSFWGATAAVGVGAVGGAIKGGIQTGTWQGAALKGIGYGIKDGITYGLICRY*	SlvV
BIOML-A21	ACSFWGATAAVGVGAVGGAIKGGIQTGTWQGAALKGIGYGIKDGITYGLICRY*	SlvV
BIOML-A22	ACSFWGATAAVGVGAVGGAIKGGIQTGTWQGAALKGIGYGIKDGITYGLICRY*	SlvV
BIOML-A23	ACSFWGATAAVGVGAVGGAIKGGIQTGTWQGAALKGIGYGIKDGITYGLICRY*	SlvV
BIOML-A24	ACSFWGATAAVGVGAVGGAIKGGIQTGTWQGAALKGIGYGIKDGITYGLICRY*	SlvV
BIOML-A25	ACSFWGATAAVGVGAVGGAIKGGIQTGTWQGAALKGIGYGIKDGITYGLICRY*	SlvV
BIOML-A26	ACSFWGATAAVGVGAVGGAIKGGIQTGTWQGAALKGIGYGIKDGITYGLICRY*	SlvV
BIOML-A27	ACSFWGATAAVGVGAVGGAIKGGIQTGTWQGAALKGIGYGIKDGITYGLICRY*	SlvV
BIOML-A28	ACSFWGATAAVGVGAVGGAIKGGIQTGTWQGAALKGIGYGIKDGITYGLICRY*	SlvV
BIOML-A30	ACSFWGATAAVGVGAVGGAIKGGIQTGTWQGAALKGIGYGIKDGITYGLICRY*	SlvV
BIOML-A31	ACSFWGATAAVGVGAVGGAIKGGIQTGTWQGAALKGIGYGIKDGITYGLICRY*	SlvV
BIOML-A32	ACSFWGATAAVGVGAVGGAIKGGIQTGTWQGAALKGIGYGIKDGITYGLICRY*	SlvV
BIOML-A33	ACSFWGATAAVGVGAVGGAIKGGIQTGTWQGAALKGIGYGIKDGITYGLICRY*	SlvV
BIOML-A34	ACSFWGATAAVGVGAVGGAIKGGIQTGTWQGAALKGIGYGIKDGITYGLICRY*	SlvV
BIOML-A35	ACSFWGATAAVGVGAVGGAIKGGIQTGTWQGAALKGIGYGIKDGITYGLICRY*	SlvV
BIOML-A6	ACSFWGATAAVGVGAVGGAVKGGIQTGTWQGAALKGIGYGIKGGITYGLTCRY*	SlvV
BIOML-A7	ACSFWGATAAVGVGAVGGAIKGGIQTGTWQGAALKGIGYGIKDGITYGLICRY*	SlvV
BIOML-A8	ACSFWGATAAVGVGAVGGAVKGGIQTGTWQGAALKGIGYGIKGGITYGLTCRY*	SlvV
BIOML-A9	ACSFWGATAAVGVGAVGGAVKGGIQTGTWQGAALKGIGYGIKGGITYGLTCRY*	SlvV
CCHSS3	ACSFWGATAAVGVGAVGGAVKGGIQTGTWQGAALKGIGYGIKGGITYGLTCRY*	SlvV
DB-B5	ACSFWGATAAVGVGAVGGAIKGGIQTGTWQGAALKGIGYGIKDGITYGLICRY*	SlvV
DE0578	ACSFWGATAAVGVGAVGGAIKGGIQTGTWQGAALKGIGYGIKDGITYGLICRY*	SlvV
F6-1	ACSFWGATAAVGVGAVGGAVKGGIQTGTWQGAALKGIGYGIKGGITYGLTCRY*	SlvV
FDAARGOS_1045	ACSFWGATAAVGVGAVGGAVKGGIQTGTWQGAALKGIGYGIKGGITYGLTCRY*	SlvV
FDAARGOS_259	VCSFWGATAAVGVGAVGGAIKGGIQTGTWQGAALKGIGYGIKDGITYGLICRY*	SlvV
FDAARGOS_771	ACSFWGATAAVGVGAVGGAIKGGIQTGTWQGAALKGIGYGIKDGITYGLICRY*	SlvV
HS0302	ACSFWGATAAVGVGAVGGAIKGGIQTGTWQGAALKGIGYGIKDGITYGLICRY*	SlvV
HSISS4	ACSFWGATAAVGVGAVGGAIKGGIQTGTWQGAALKGIGYGIKDGITYGLICRY*	SlvV
ICDC1	ACSFWGATAAVGVGAVGGAIKGGIQTGTWQGAALKGIGYGIKDGITYGLICRY*	SlvV
ICDC2	ACSFWGATAAVGVGAVGGAIKGGIQTGTWQGAALKGIGYGIKDGITYGLICRY*	SlvV
ICDC3	ACSFWGATAAVGVGAVGGAIKGGIQTGTWQGAALKGIGYGIKDGITYGLICRY*	SlvV
JF	ACSFWGATAAVGVGAVGGAIKGGIQTGTWQGAALKGIGYGIKDGITYGLICRY*	SlvV
JIM8777	ACSFWGATAAVGVGAVGGAIKGGIQTGTWQGAALKGIGYGIKDGITYGLICRY*	SlvV
K12	ACSFWGATAAVGVGAVGGAVKGGIQTGTWQGAALKGIGYGIKGGITYGLTCRY*	SlvV
LAB813	ACSFWGATAAVGVGAVGGAIKGGIQTGTWQGAALKGIGYGIKGGITYGLTCRY*	SlvV
MGYG-HGUT-00113	ACSFWGATAAVGVGAVGGAIKGGIQTGTWQGAALKGIGYGIKDGITYELICRY*	SlvV
NCTC8618	ACSFWGATAAVGVGAVGGAIKGGIQTGTWQGAALKGIGYGIKDGITYGLICRY*	SlvV
PS4	ACSFWEATAAVGVGAVGGAVKGGIQTGTWQGAALKGIGYGINGGITYGFTCRY*	SlvV
SALI-10	ACSFWGATAAVGVGAVGGAIKGGIQTGTWQGAALKGIGYGIKDGITYGLICRY*	SlvV
Ssal B57	ACSFWGATAAVGVGAVGGAIKGGIQTGTWQGAALKGIGYGIKDGITYGLICRY*	SlvV
Ssal B63	ACSFWGATAAVGVGAVGGAIKGGIQTGTWQGAALKGIGYGIKDGITYGLICRY*	SlvV
Ssal L22	ACSFWGATAAVGVGAVGGAVKGGIQTGTWQGAALKGIGYGIKGGITYGLTCRY*	SlvV
Ssal L25	ACSFWGATAAVGVGAVGGAIKGGIQTGTWQGAALKGIGYGIKDGITYGLICRY*	SlvV
Ssal L45	ACSFWGATAAVGVGAVGGAIKGGIQTGTWQGAALKGIGYGIKDGITYGLICRY*	SlvV
Ssal L61	ACSFWGATAAVGVGAVGGAIKGGIQTGTWQGAALKGIGYGIKDGITYGLICRY*	SlvV
Ssal N5	ACSFWGATAAVGVGAVGGAVKGGIQTGTWQGAALKGIGYGIKGGITYGLTCRY*	SlvV
UC3162	ACSFWGATAAVGVGAVGGAIKGGIQTGTWQGAALKGIGYGIKDGITYGLICRY*	SlvV
VA08-2AN	ACSFWGATAAVGVGAVGGAIKGGIQTGTWQGAALKGIGYGIKDGITYGLICRY*	SlvV
1001175st1_H3	DFVSRPQTLPERLGWNKWWLKRKYPYGD*	SlvW
1003_SOLI	DFVSRPQTLPERLGWNRWWLKRKHPYGD*	SlvW
1270_SSAL	DFVSRPQTLPERLGWNKWWLKRKYPYGD*	SlvW
20-12 S2	DFVSRPQTLPERLGWNKWWLKRRPPYGD*	SlvW
22-08 S7	DFVSRPQTLPERLGWNKWWLKRRPPYGD*	SlvW
34-09 S8	GFVSKPQTLPERLGWNKWWLKRRPPYGD*	SlvW
34-19 S9	GFVSKPQTLPERLGWNKWWLKRRPPYGD*	SlvW
34-24 S10	GFVSKPQTLPERLGWNKWWLKRRPPYGD*	SlvW
37-08 S12	DFVSRPQTLPERLGWNKWWLKRKYPYGD*	SlvW
37-09 S13	GFVSKPQTLPERLGWNKWWLKRRPPYGD*	SlvW
39-01 S14	DFVSRPQTLPERLGWNRWWLKRKYPYGD*	SlvW
39-07 S15	GFVSKPQTLPERLGWNKWWLKRRPPYGD*	SlvW
39-09 S16	GFVSKPQTLPERLGWNKWWLKRRPPYGD*	SlvW
40-02 S18	DFVSRPQTLPERLGWNKWWLKRRPPYGD*	SlvW
57.I	DFVSRPQTLPERLGWNKWWLKRRPPYGD*	SlvW
726_SSAL	DFVSRPQTLPERLGWNKWWLKRKYPYGD*	SlvW
84-12 S20	GFVSKPQTLPERLGWNKWWLKRRPPYGD*	SlvW
85-02 S21	GFVSKPQTLPERLGWNKWWLKRRPPYGD*	SlvW
85-04 S22	GFVSKPQTLPERLGWNKWWLKRRPPYGD*	SlvW
85-05 S23	GFVSKPQTLPERLGWNKWWLKRRPPYGD*	SlvW
85-06 S24	GFVSKPQTLPERLGWNKWWLKRRPPYGD*	SlvW
AF10-23	DFVSRPQTLPERLGWNKWWLKRKYPYGD*	SlvW
AF23-9AC	DFVSRPQTLSERLGWNKWWLKRKYPYGD*	SlvW
AF29-16	DFVSRPQTLPERLGWNKWWLKRKYPYGD*	SlvW
ATCC 25975	GFVSKPQTLPERLGWNKWWLKRRPPYGD*	SlvW
ATCC 27945	DFVSRPQTLPGRLGWNRWWLKRKYPYGD*	SlvW
ATCC 7073	DFVSRPQTLPERLGWNRWWLKRKYPYGD*	SlvW
BCC42	DFVSRPQTLPERLGWNKWWLKRKYPYGD*	SlvW
bf_0095	NFVYRPKTFPERLGWDRWWLKRKYPYGD*	SlvW
BIOML-A1	DFVSRPQTLPERLGWNKWWLKRRPPYGD*	SlvW
BIOML-A10	NFVYRPKTFPERLGWDRWWLKRKYPYGD*	SlvW
BIOML-A13	GFVSKPQTLPERLGWNKWWLKRRPPYGD*	SlvW
BIOML-A17	GFVSKPQTLPERLGWNKWWLKRRPPYGD*	SlvW
BIOML-A18	GFVSKPQTLPERLGWNKWWLKRRPPYGD*	SlvW
BIOML-A19	GFVSKPQTLPERLGWNKWWLKRRPPYGD*	SlvW
BIOML-A2	DFVSRPQTLPERLGWNKWWLKRRPPYGD*	SlvW
BIOML-A20	DFVSRPQTLPERLGWNKWWLKRRPPYGD*	SlvW
BIOML-A21	GFVSKPQTLPERLGWNKWWLKRRPPYGD*	SlvW
BIOML-A22	GFVSKPQTLPERLGWNKWWLKRRPPYGD*	SlvW
BIOML-A23	GFVSKPQTLPERLGWNKWWLKRRPPYGD*	SlvW
BIOML-A24	GFVSKPQTLPERLGWNKWWLKRRPPYGD*	SlvW
BIOML-A25	GFVSKPQTLPERLGWNKWWLKRRPPYGD*	SlvW
BIOML-A26	GFVSKPQTLPERLGWNKWWLKRRPPYGD*	SlvW
BIOML-A27	GFVSKPQTLPERLGWNKWWLKRRPPYGD*	SlvW
BIOML-A28	GFVSKPQTLPERLGWNKWWLKRRPPYGD*	SlvW
BIOML-A3	GFVSKPQTLPERLGWNKWWLKRRPPYGD*	SlvW
BIOML-A30	GFVSKPQTLPERLGWNKWWLKRRPPYGD*	SlvW
BIOML-A31	GFVSKPQTLPERLGWNKWWLKRRPPYGD*	SlvW
BIOML-A32	GFVSKPQTLPERLGWNKWWLKRRPPYGD*	SlvW
BIOML-A33	GFVSKPQTLPERLGWNKWWLKRRPPYGD*	SlvW
BIOML-A34	GFVSKPQTLPERLGWNKWWLKRRPPYGD*	SlvW
BIOML-A35	GFVSKPQTLPERLGWNKWWLKRRPPYGD*	SlvW
BIOML-A4	GFVSKPQTLPERLGWNKWWLKRRPPYGD*	SlvW
BIOML-A5	GFVSKPQTLPERLGWNKWWLKRRPPYGD*	SlvW
BIOML-A6	DFVSRPQTLPERLGWNRWWLKRKYPYGD*	SlvW
BIOML-A7	NFVYRPKTFPERLGWDRWWLKRKYPYGD*	SlvW
BIOML-A8	DFVSRPQTLPERLGWDRWWLKRKYPYGD*	SlvW
BIOML-A9	DFVSRPQTLPERLGWNRWWLKRKYPYGD*	SlvW
CCHSS3	DFVSRPQTLPERLGWNKWWLKRKYPYGD*	SlvW
DB-B5	DFVSRPQTLPERLGWNRWWLKRKYPYGD*	SlvW
DE0578	GFVSRPQTLPERLGWNKWWLKRRPPYGD*	SlvW
F6-1	DFVSSPQTLTERLGWNRWWLKIKYPYGD*	SlvW
FDAARGOS_1045	GFVSKPQTLPERLGWNKWWLKRRPPYGD*	SlvW
FDAARGOS_259	DFVSRPQTLPERLGWNKWWLKRRPPYGD*	SlvW
FDAARGOS_771	DFVSRPQTLPERLGWNRWWLKRKHPYGD*	SlvW
HS0302	GFVSKPQTLPERLGWNKWWLKRRPPYGD*	SlvW
HSISS4	DFVSRPQTLPERLGWNKWWLKRRPPYGD*	SlvW
ICDC1	DFVSRPQTLPERLGWNKWWLKRKYPYGD*	SlvW
ICDC2	GFVSKPQTLPERLGWNKWWLKRRPPYGD*	SlvW
ICDC3	DFVSRPQTLPERLGWNKWWLKRKYPYGD*	SlvW
JF	DFVSRPQTLPERLGWNRWWLKRKYPYGD*	SlvW
JIM8777	DFVSRPQTLPERLGWNRWWLKRKYPYGD*	SlvW
K12	GFVSKPQTLPERLGWNKWWLKRRPPYGD*	SlvW
KB005	DFVSRPQTLPERLGWNKWWLKRKYPYGD*	SlvW
LAB813	DFVSRPQTLPERLGWNKWWLKRKYPYGD*	SlvW
M18	GFVSKPQTLPERLGWNKWWLKRRPPYGD*	SlvW
MGYG-HGUT-00113	DFVSRPQTLPERLGWNRWWLKRKYPYGD*	SlvW
MIT 14-1770-C1	DFVSRPQTLPERLGWNKWWLKRKYPYGD*	SlvW
NCTC7366	DFVSRPQTLPERLGWNKWWLKRKYPYGD*	SlvW
NCTC8618	DFVSRPQTLPERLGWNRWWLKRKYPYGD*	SlvW
Ssal B50	DFVSRPQTLPERLGWNKWWLKRRPPYGD*	SlvW
Ssal B57	DFVSRPQTLPERLGWNKWWLKRKYPYGD*	SlvW
Ssal B63	DFVSRPQTLPERLGWNRWWLKRKYPYGD*	SlvW
Ssal L22	DFVSRPQTLPERLGWNRWWLKRKYPYGD*	SlvW
Ssal L25	DFVSRPQTLPERLGWNRWWLKRKYPYGD*	SlvW
Ssal L45	GFVSKPQTLPERLGWNKWWLKRRPPYGD*	SlvW
Ssal L61	DFVSRPQTLPERLGWNKWWLKRKYPYGD*	SlvW
Ssal L64	DFVSRPQTLPERLGWNKWWLKRRPPYGD*	SlvW
Ssal N20	DFVSRPQTLPGRLGWNRWWLKRKYPYGD*	SlvW
Ssal N5	GFVSKPQTLPERLGWNKWWLKRRPPYGD*	SlvW
UBSS01	GFVSKPQTLPERLGWNKWWLKRRPPYGD*	SlvW
UC3162	DFVSRPQTLPERLGWNKWWLKRKYPYGD*	SlvW
UMB0051	DFVSRPQTLPERLGWNKWWLKRRPPYGD*	SlvW
VA08-2AN	DFVSRPQTLPERLGWNKWWLKRKYPYGD*	SlvW
1003_SOLI	GCSWNNAAKAALGTSITGLITSGPGGALLGLAGGAVSYGALCWV*	SlvX
84-12 S20	GCSWNNAAKAALGTSITGLITSGPGGALLGLAGGAVSYGALCWV*	SlvX
BIOML-A1	GCSWNNAAKAALGTSITGLITSGPGGALLGLAGGAVSYGALCWV*	SlvX
BIOML-A2	GCSWNNAAKAALGTSITGLITSGPGGALLGLAGGAVSYGALCWV*	SlvX
BIOML-A3	GCSWNNAAKAALGTSITGLITSGPGGALLGLAGGAVSYGALCWV*	SlvX
BIOML-A4	GCSWNNAAKAALGTSITGLITSGPGGALLGLAGGAVSYGALCWV*	SlvX
BIOML-A5	GCSWNNAAKAALGTSITGLITSGPGGALLGLAGGAVSYGALCWV*	SlvX
HS0302	GCSWNNAAKAALGTSITGLITSGPGGALLGLAGGAVSYGALCWV*	SlvX
HSISS4	GCSWNNAAKAALGTSITGLITSGPGGALLGLAGGAVSYGALCWV*	SlvX
Ssal L45	GCSWNNAAKAALGTSITGLITSGPGGALLGLAGGAVSYGALCWV*	SlvX
UBSS01	GCSWNNAAKAALGTSITGLITSGPGGALLGLAGGAVSYGALCWV*	SlvX
1001175st1_H3	GWKTNLAIGGLCLASGPIGTMVCLGAYNGYMDSAR*	SlvY
1003_SOLI	GWKTNLAIGGLCLASGPIGTMVCLGAYNGYMDSAR*	SlvY
1270_SSAL	GWKTNLAIGGLCLASGPIGTMVCLGAYNGYMDSAR*	SlvY
140_SSAL	GWKTNLAIGGLCLASGPIGTMMCLGAYNGYMDSAR*	SlvY
20-12 S2	GWKTNLAIGGLCLASGPIGTMVCLGAYNGYMDSAR*	SlvY
22-08 S7	GWKTNLAIGGLCLASGPIGTMMCLGAYNGYMDSAR*	SlvY
34-09 S8	GWKTNLAIGGLCLASGPIGTMMCLGAYNGYMDSAR*	SlvY
34-19 S9	GWKTNLAIGGLCLASGPIGTMMCLGAYNGYMDSAR*	SlvY
34-24 S10	GWKTNLAIGGLCLASGPIGTMMCLGAYNGYMDSAR*	SlvY
37-08 S12	GWKTNIAIGGLCLASGPIGTMVCLGAYNGYMDSAR*	SlvY
37-09 S13	GWKTNLAIGGLCLASGPIGTMMCLGAYNGYVDSAR*	SlvY
39-01 S14	GWKTNLAIGGLCLASGPIGTMVCLGAYNGYMDSAR*	SlvY
39-07 S15	GWKTNLAIGGLCLASGPIGTMMCLGAYNGYMDSAR*	SlvY
39-09 S16	GWKTNLAIGGLCLASGPIGTMMCLGAYNGYMDSAR*	SlvY
40-02 S18	GWKTNLAIGGLCLASGPIGTMMCLGAYNGYMDSAR*	SlvY
57.I	GWKTNLAIGGLCLASGPIGTMVCLGAYNGYMDSAR*	SlvY
726_SSAL	GWKTNIAIGGLCLASGPIGTMVCLGAYNGYMDSAR*	SlvY
84-12 S20	GWKTNLAIGGLCLASGPIGTMVCLGAYNGYMDSAR*	SlvY
85-02 S21	GWKTNLAIGGLCLASGPIGTMVCLGAYNGYMDSAR*	SlvY
85-04 S22	GWKTNLAIGGLCLASGPIGTMVCLGAYNGYMDSAR*	SlvY
85-05 S23	GWKTNLAIGGLCLASGPIGTMVCLGAYNGYMDSAR*	SlvY
85-06 S24	GWKTNLAIGGLCLASGPIGTMVCLGAYNGYMDSAR*	SlvY
AF10-23	GWKTNLAIGGLCLASGPIGTMVCLGAYNGYMDSAR*	SlvY
AF23-9AC	GWKTNLAIGGLCLASGPIGTMVCLGAYNGYMDSAR*	SlvY
AF29-16	GWKTNLAIGGLCLASGPIGTMVCLGAYNGYMDSAR*	SlvY
ATCC 25975	GWKTNLAIGGLCLASGPIGTMVCLGAYNGYMDSAR*	SlvY
ATCC 27945	GWKTNLAIGGLCLASGPIGTMVCLGAYNGYMDSAR*	SlvY
ATCC 7073	GWKTNLAIGGLCLASRPIGTMVCLGAYNGYMDSAR*	SlvY
BCC42	GWKTNIAIGGLCLASGPIGTMVCLGAYNGYMDSAR*	SlvY
bf_0095	GWKTNLAIGGLCLASGPIGTMVCLGAYNGYMDSAR*	SlvY
BIOML-A1	GWKTNLAVGGLCLASGPIGTMICLGAYNGYMDSAR*	SlvY
BIOML-A10	GWKTNLAIGGLCLASGPIGTMVCLGAYNGYMDSAR*	SlvY
BIOML-A13	GWKTNLAIGGLCLASGPIGTMMCLGAYNGYMDSAR*	SlvY
BIOML-A17	GWKTNLAIGGLCLASRPIGTMVCLGAYNGYMDSAR*	SlvY
BIOML-A18	GWKTNLAIGGLCLASRPIGTMVCLGAYNGYMDSAR*	SlvY
BIOML-A19	GWKTNLAIGGLCLASGPIGTMMCLGAYNGYMDSAR*	SlvY
BIOML-A2	GWKTNLAVGGLCLASGPIGTMICLGAYNGYMDSAR*	SlvY
BIOML-A20	GWKTNLAIGGLCLASGPIGTMVCLGAYNGYMDSAR*	SlvY
BIOML-A21	GWKTNLAIGGLCLASGPIGTMMCLGAYNGYMDSAR*	SlvY
BIOML-A22	GWKTNLAIGGLCLASGPIGTMMCLGAYNGYMDSAR*	SlvY
BIOML-A23	GWKTNLAIGGLCLASGPIGTMMCLGAYNGYMDSAR*	SlvY
BIOML-A24	GWKTNLAIGGLCLASGPIGTMMCLGAYNGYMDSAR*	SlvY
BIOML-A25	GWKTNLAIGGLCLASGPIGTMMCLGAYNGYMDSAR*	SlvY
BIOML-A26	GWKTNLAIGGLCLASRPIGTMVCLGAYNGYMDSAR*	SlvY
BIOML-A27	GWKTNLAIGGLCLASRPIGTMVCLGAYNGYMDSAR*	SlvY
BIOML-A28	GWKTNLAIGGLCLASRPIGTMVCLGAYNGYMDSAR*	SlvY
BIOML-A3	GWKTNLAIGGLCLASGPIGTMICLGAYNGYMDSAR*	SlvY
BIOML-A30	GWKTNLAIGGLCLASRPIGTMVCLGAYNGYMDSAR*	SlvY
BIOML-A31	GWKTNLAIGGLCLASRPIGTMVCLGAYNGYMDSAR*	SlvY
BIOML-A32	GWKTNLAIGGLCLASRPIGTMVCLGAYNGYMDSAR*	SlvY
BIOML-A33	GWKTNLAIGGLCLASRPIGTMVCLGAYNGYMDSAR*	SlvY
BIOML-A34	GWKTNLAIGGLCLASRPIGTMVCLGAYNGYMDSAR*	SlvY
BIOML-A35	GWKTNLAIGGLCLASRPIGTMVCLGAYNGYMDSAR*	SlvY
BIOML-A4	GWKTNLAIGGLCLASGPIGTMICLGAYNGYMDSAR*	SlvY
BIOML-A5	GWKTNLAIGGLCLASGPIGTMICLGAYNGYMDSAR*	SlvY
BIOML-A6	GWKTNLAIGGLCLASGPIGTMMCLGAYNGYMDSAR*	SlvY
BIOML-A7	GWKTNLAIGGLCLASGPIGTMVCLGAYNGYMDSAR*	SlvY
BIOML-A8	GWKTNLAIGGLCLASGPIGTMMCLGAYNGYMDSAR*	SlvY
BIOML-A9	GWKTNLAIGGLCLASGPIGTMMCLGAYNGYMDSAR*	SlvY
CCHSS3	GWKTNLAVGGLCLASGPIGTMICLGAYNGYMDSAR*	SlvY
DB-B5	GWKTNLAIGGLCLASGPIGTMVCLGAYNGYMDSAR*	SlvY
DE0578	GWKTNLAIGGLCLASGPIGTMICLGAYNGYMDSAR*	SlvY
F6-1	GWKTNLAIGGLCLASGPIGTMVCLGAYNGYMDSAR*	SlvY
FDAARGOS_1045	GWKTNLAVGGLCLASGPIGTMICLGAYNGYMDSAR*	SlvY
FDAARGOS_259	GWKTNLAVGGLCLASGPIGTMICLGAYNGYMDSAR*	SlvY
FDAARGOS_771	GWKTNLAIGGLCLASGPIGTMVCLGAYNGYMDSAR*	SlvY
HS0302	GWKTNLAIGGLCLASGPIGTMVCLGAYNGYMDSAR*	SlvY
HSISS4	GWKTNLAIGGLCLASGPIGTMVCLGAYNGYMDSAR*	SlvY
ICDC1	GWKTNLAIGGLCLASGPIGTMVCLGAYNGYMDSAR*	SlvY
ICDC2	GWKTNLAIGGLCLASGPIGTMVCLGAYNGYMDSAR*	SlvY
ICDC3	GWKTNLAIGGLCLASGPIGTMVCLGAYNGYMDSAR*	SlvY
JF	GWKTNLAIGGLCLASRPIGTMVCLGAYNGYMDSAR*	SlvY
JIM8777	GWKTNLAIGGLCLASGPIGTMMCLGAYNGYMDSAR*	SlvY
K12	GWKTNLAVGGLCLASGPIGTMICLGAYNGYMDSAR*	SlvY
KB005	GWKTNLAIGGLCLASGPIGTMVCLGAYNGYMDSAR*	SlvY
LAB813	GWKTNLAIGGLCLASGPIGTMVCLGAYNGYMDSAR*	SlvY
M18	GWKTNLAIGGLCLASGPIGTMVCLGAYNGYMDSAR*	SlvY
MGYG-HGUT-00113	GWKTNLAIGGLCLASRPIGTMVCLGAYNGYMDSAR*	SlvY
MIT 14-1770-C1	GWKTNLAIGGLCLASGPIGTMVCLGAYNGYMDSAR*	SlvY
NCTC7366	GWKTNLAIGGLCLASGPIGTMVCLGAYNGYMDSAR*	SlvY
NCTC8618	GWKTNLAIGGLCLASRPIGTMVCLGAYNGYMDSAR*	SlvY
NU10	GWKTNLAIGGLCLASGPIGTMMCLGAYNGYMDSAR*	SlvY
PS4	GWKTNIAIGGLCLASGPIGTLVCVGAYNGYKDSAR*	SlvY
SALI-10	GWKTNLAIGGLCLASGPIGTMVCLGAYNGYMDSAR*	SlvY
Ssal B50	GWKTNLAIGGLCLASGPIGTMVCLGAYNGYMDSAR*	SlvY
Ssal B57	GWKTNLAIGGLCLASGPIGTMVCLGAYNGYMDSAR*	SlvY
Ssal B63	GWKTNLAIGGLCLASGPIGTMVCLGAYNGYMDSAR*	SlvY
Ssal L22	GWKTNLAIGGLCLASGPIGTMVCLGAYNGYMDSAR*	SlvY
Ssal L25	GWKTNLAIGGLCLASGPIGTMVCLGAYNGYMDSAR*	SlvY
Ssal L45	GWKTNLAIGGLCLASGPIGTMVCLGAYNGYMDSAR*	SlvY
Ssal L61	GWKTNLAIGGLCLASGPIGTMVCLGAYNGYMDSAR*	SlvY
Ssal L64	GWKTNLAIGGLCLASGPIGTMVCLGAYNGYMDSAR*	SlvY
Ssal N20	GWKTNLAIGGLCLASGPIGTMVCLGAYNGYMDSAR*	SlvY
Ssal N5	GWKTNLAIGGLCLASRPIGTMVCLGAYNGYMDSAR*	SlvY
UBSS01	GWKTNLAIGGLCLASGPIGTMMCLGAYNGYMDSAR*	SlvY
UC3162	GWKTNLAIGGLCLASGPIGTMVCLGAYNGYMDSAR*	SlvY
UMB0051	GWKTNLAIGGLCLASGPIGTMVCLGAYNGYMDSAR*	SlvY
VA08-2AN	GWKTNLAIGGLCLASGPIGTMVCLGAYNGYMDSAR*	SlvY
YU10	GWKTNLAIGGLCLASGPIGTMMCLGAYNGYMDSAR*	SlvY
1001175st1_H3	VVPWAAISVGIAAAKLTYDLSYAAGKSFYNLTH*	SlvZ
1003_SOLI	VVPWAAISVGIAAAKLTYDLSYAAGKSFYNLTH*	SlvZ
1270_SSAL	VVPWAAISVGIAAAKLTYDLSYAAGKSFYNLTH*	SlvZ
140_SSAL	VVPWAAISVGIAAAKLTYDLSYAAGKSFYNLTH*	SlvZ
20-12 S2	VVPWAAISVGIAAAKLTYDLSYAAGKSFYNLTH*	SlvZ
22-08 S7	VVPWAAISVGIAAAKLTYDLSYAAGKSFYNLTH*	SlvZ
34-09 S8	VVPWAAISVGIAAAKLTYDLSYAAGKSFYNLTH*	SlvZ
34-19 S9	VVPWAAISVGIAAAKLTYDLSYAAGKSFYNLTH*	SlvZ
34-24 S10	VVPWAAISVGIAAAKLTYDLSYAAGKSFYNLTH*	SlvZ
37-08 S12	VVPWAAISVGIAAAKLTYDLSYAAGKSFYNLTH*	SlvZ
37-09 S13	VVPWAAISVGIAAAKLTYDLSYAAGKSFYNLTH*	SlvZ
39-01 S14	VVPWAAISVGIAAAKLTYDLSYAAGKSFYNLTH*	SlvZ
39-07 S15	VVPWAAISVGIAAAKLTYDLSYAAGKSFYNLTH*	SlvZ
39-09 S16	VVPWAAISVGIAAAKLTYDLSYAAGKSFYNLTH*	SlvZ
40-02 S18	VVPWAAISVGIAAAKLTYDLSYAAGKSFYNLTH*	SlvZ
57.I	VVPWAAISVGIAAAKLTYDLSYAAGKSFYNLTH*	SlvZ
726_SSAL	VVPWAAISVGIAAAKLTYDLSYAAGKSFYNLTH*	SlvZ
84-12 S20	VVPWAAISVGIAAAKLTYDLSYAAGKSFYNLTH*	SlvZ
85-02 S21	VIPWAAISVGIAAAKLTYDLSYAAGKSFYNLTH*	SlvZ
85-04 S22	VIPWAAISVGIAAAKLTYDLSYAAGKSFYNLTH*	SlvZ
85-05 S23	VIPWAAISVGIAAAKLTYDLSYAAGKSFYNLTH*	SlvZ
85-06 S24	VIPWAAISVGIAAAKLTYDLSYAAGKSFYNLTH*	SlvZ
AF10-23	VVPWAAISVGIAAAKLTYDLSYAAGKSFYNLTH*	SlvZ
AF23-9AC	VVPWAAISVGMAAAKLTYDLSYAAGKSFYNLTH*	SlvZ
AF29-16	VVPWAAISVGIAAAKLTYDLSYAAGKSFYNLTH*	SlvZ
ATCC 25975	VVPWAAISVGIAAAKLTYDLSYAAGKSFYNLTH*	SlvZ
ATCC 27945	VVPWAAISVGIAAAKLTYDLSYAAGKSFYNLTH*	SlvZ
ATCC 7073	VVPWAAISVGIAAAKLTYDLSYAAGKSFYNLTH*	SlvZ
BCC42	VVPWAAISVGIAAAKLTYDLSYAAGKSFYNLTH*	SlvZ
bf_0095	VVPWAAISVGIAAAKLTYDLSYAAGKSFYNLIH*	SlvZ
BIOML-A1	VVPWVAISVGMAAAKLTYDLSYATGKSFYNLTH*	SlvZ
BIOML-A10	VVPWAAISVGIAAAKLTYDLSYAAGKSFYNLIH*	SlvZ
BIOML-A13	VVPWAAISVGIAAAKLTYDLSYAAGKSFYNLTH*	SlvZ
BIOML-A17	VVPWAAISVGIAAAKLTYDLSYAAGKSFYNLTH*	SlvZ
BIOML-A18	VVPWAAISVGIAAAKLTYDLSYAAGKSFYNLTH*	SlvZ
BIOML-A19	VVPWAAISVGIAAAKLTYDLSYAAGKSFYNLTH*	SlvZ
BIOML-A2	VVPWVAISVGMAAAKLTYDLSYATGKSFYNLTH*	SlvZ
BIOML-A20	VVPWAAISVGIAAAKLTYDLSYAAGKSFYNLTH*	SlvZ
BIOML-A21	VVPWAAISVGIAAAKLTYDLSYAAGKSFYNLTH*	SlvZ
BIOML-A22	VVPWAAISVGIAAAKLTYDLSYAAGKSFYNLTH*	SlvZ
BIOML-A23	VVPWAAISVGIAAAKLTYDLSYAAGKSFYNLTH*	SlvZ
BIOML-A24	VVPWAAISVGIAAAKLTYDLSYAAGKSFYNLTH*	SlvZ
BIOML-A25	VVPWAAISVGIAAAKLTYDLSYAAGKSFYNLTH*	SlvZ
BIOML-A26	VVPWAAISVGIAAAKLTYDLSYAAGKSFYNLTH*	SlvZ
BIOML-A27	VVPWAAISVGIAAAKLTYDLSYAAGKSFYNLTH*	SlvZ
BIOML-A28	VVPWAAISVGIAAAKLTYDLSYAAGKSFYNLTH*	SlvZ
BIOML-A3	VVPWVAISVGMAAAKLTYDLSYTAGKSFYNLTH*	SlvZ
BIOML-A30	VVPWAAISVGIAAAKLTYDLSYAAGKSFYNLTH*	SlvZ
BIOML-A31	VVPWAAISVGIAAAKLTYDLSYAAGKSFYNLTH*	SlvZ
BIOML-A32	VVPWAAISVGIAAAKLTYDLSYAAGKSFYNLTH*	SlvZ
BIOML-A33	VVPWAAISVGIAAAKLTYDLSYAAGKSFYNLTH*	SlvZ
BIOML-A34	VVPWAAISVGIAAAKLTYDLSYAAGKSFYNLTH*	SlvZ
BIOML-A35	VVPWAAISVGIAAAKLTYDLSYAAGKSFYNLTH*	SlvZ
BIOML-A4	VVPWVAISVGMAAAKLTYDLSYTAGKSFYNLTH*	SlvZ
BIOML-A5	VVPWVAISVGMAAAKLTYDLSYTAGKSFYNLTH*	SlvZ
BIOML-A6	VVPWAAISVGIAAAKLTYDLSYAAGKSFYNLTH*	SlvZ
BIOML-A7	VVPWAAISVGIAAAKLTYDLSYAAGKSFYNLIH*	SlvZ
BIOML-A8	VVPWAAISVGIAAAKLTYDLSYAAGKSFYNLTH*	SlvZ
BIOML-A9	VVPWAAISVGIAAAKLTYDLSYAAGKSFYNLTH*	SlvZ
CCHSS3	VVPWGAISVGMAAAKLTYDLSYAAGKSFYNLTH*	SlvZ
DB-B5	VVPWAAISVGIAAAKLTYDLSYAAGKSFYNLTH*	SlvZ
DE0578	VVPWVAISVGMAAAKLTYDLSYAAGKSFYNLTH*	SlvZ
F6-1	VVPWVAISVGMAAAKLTYDLSYAAGKSFYNLTH*	SlvZ
FDAARGOS_1045	VVPWVAISVGMAAAKLTYDLSYAAGKSFYNLTH*	SlvZ
FDAARGOS_259	VVPWVAISVGMAAAKLTYDLSYAAGKSFYNLTH*	SlvZ
FDAARGOS_771	VVPWAAISVGIAAAKLTYDLSYAAGKSFYNLTH*	SlvZ
HS0302	VVPWAAISVGIAAAKLTYDLSYAAGKSFYNLTH*	SlvZ
HSISS4	VVPWAAISVGIAAAKLTYDLSYAAGKSFYNLTH*	SlvZ
ICDC1	VVPWAAISVGIAAAKLTYDLSYAAGKSFYNLTH*	SlvZ
ICDC2	VVPWAAISVGIAAAKLTYDLSYAAGKSFYNLTH*	SlvZ
ICDC3	VVPWAAISVGIAAAKLTYDLSYAAGKSFYNLTH*	SlvZ
JF	VVPWAAISVGIAAAKLTYDLSYAAGKSFYNLTH*	SlvZ
[truncated: 27 more rows]
