# Supplementary material for: Uncovering the class II-bacteriocin predatiome in salivarius streptococci
Source: Research Square preprint supplement (doi:10.21203/rs.3.rs-4499347/v1), 2024-06-26
Supplement: Supplementary file 3 [file 96255bc6bcdac98aa4c119a4.xlsx]

## Sheet: L.monocytogenes
	Δslv5			Mean	HSISS4			Mean
PsnJ	0	0	0	0	0	0	0	0
PsnK	1.95452	1.91262	1.70915	1.85876	3.65625	3.63797	3.50191	3.59871
PsnL	1.04161	1.31671	1.07075	1.14302	1.57481	1.52728	1.47039	1.52416
-	0	0	0	0	0	0	0	0
Tukey's multiple comparisons test	Mean Diff,	95,00% CI of diff,	Below threshold?	Summary	Adjusted P Value
Δslv5 + PsnK vs. HSISS4 + PsnK	-1.74	-1,963 to -1,517	Yes	****	<0,0001
HSISS4 vs. HSISS4 + PsnL	-1.524	-1,747 to -1,301	Yes	****	<0,0001
HSISS4 vs. HSISS4 + PsnK	-3.599	-3,822 to -3,375	Yes	****	<0,0001

## Sheet: S. aureus
	Δslv5			Mean	HSISS4			Mean
PsnJ	0	0	0	0	0.676466	0.644513	0.581604	0.634195
PsnK	0	0	0	0	0.706603	0.755274	0.498406	0.653428
PsnL	1.48453	1.26923	1.22512	1.32629	1.9153	1.71778	1.70678	1.77996
-	0	0	0	0	0.767596	0.739151	0.80144	0.769396
Tukey's multiple comparisons test	Mean Diff,	95,00% CI of diff,	Below threshold?	Summary	Adjusted P Value
HSISS4 vs. HSISS4 + PsnL	-1.011	-1,245 to -0,7763	Yes	****	<0,0001

## Sheet: S. thermophilus
	Δslv5			Mean	HSISS4			Mean
PsnJ	2.64569	2.26719	2.16315	2.35868	2.70641	3.1298	2.37829	2.73817
PsnK	0	0	0	0	1.44919	0.734535	0.953569	1.04577
PsnL	1.78349	1.11747	0.791109	1.23069	1.13085	1.72578	1.69279	1.51647
-	0	0	0	0	1.35661	1.11429	1.53727	1.33606
Tukey's multiple comparisons test	Mean Diff,	95,00% CI of diff,	Below threshold?	Summary	Adjusted P Value
HSISS4 vs. HSISS4 + PsnJ	-1.402	-2,269 to -0,5348	Yes	***	0.0008

## Sheet: S. epidermidis
	Δslv5				HSISS4
PsnJ	0	0	0		0	0	0
PsnK	0	0	0		0	0	0
PsnL	0.421706	0.613646	0.60673		1.04649	1.05048	1.32504
-	0	0	0		0	0	0
Tukey's multiple comparisons test	Mean Diff,	95,00% CI of diff,	Below threshold?	Summary	Adjusted P Value
Δslv5 + PsnL vs. HSISS4 + PsnL	-0.5933	-0,7865 to -0,4002	Yes	****	<0,0001
HSISS4 vs. HSISS4 + PsnL	-1.141	-1,334 to -0,9475	Yes	****	<0,0001
